# Supplementary material
Source: publisher figshare collection journal article supplement (https://acs.figshare.com/ndownloader/files/9432949)

## *Supporting Information*

# **Ketene Amino Phosphates: Competent Substrates for Enantioselective Pd(0)-Catalyzed C-H Functionalizations**

Daria Grosheva and Nicolai Cramer\*

Laboratory of Asymmetric Catalysis and Synthesis, Institute of Chemical Sciences and Engineering, Ecole Polytechnique Fédérale de Lausanne, EPFL SB ISIC LCSA, BCH 4305, CH-1015 Lausanne, Switzerland, \*e-mail: nicolai.cramer@epfl.ch.

## *Contents of Supporting Information*

|                                                          |            |
|----------------------------------------------------------|------------|
| <b>General Methods</b>                                   | <b>S2</b>  |
| <b>Additional Optimization Experiments</b>               | <b>S4</b>  |
| <b>Experimental Procedures and Characterization Data</b> | <b>S7</b>  |
| <b>References</b>                                        | <b>S54</b> |
| <b>NMR Spectra</b>                                       | <b>S55</b> |

## General Methods

### Experimental procedures, reagents and glassware

All reactions were carried out under an atmosphere of nitrogen in oven-dried glassware with magnetic stirring, unless otherwise indicated. Toluene, THF, Et<sub>2</sub>O and dichloromethane were purified by an Innovative Technology Solvent Delivery System. DMF was dried over 4A molecular sieves. Chemicals were used as obtained from the suppliers unless otherwise stated. Diphenyl phosphoryl chloride (ClPO(OPh)<sub>2</sub>) and diethyl phosphoryl chloride (ClPO(OEt)<sub>2</sub>) was distilled under reduced pressure and stored in a glovebox. Solvent compositions are given in (v/v).

### Chromatography

Flash chromatography was performed with Silicycle silica gel 60 (0.040-0.063 µm grade). Analytical thin-layer chromatography was performed with commercial glass plates coated with 0.25 mm silica gel (E. Merck, Kieselgel 60 F254). Compounds were visualised under UV-light at 254 nm and/or developed using standard KMnO<sub>4</sub> or vanillin stains, followed by heating. Where specified silica was buffered prior to use (method: silica (100 g) was suspended in 0.2 M Na<sub>2</sub>HPO<sub>4</sub> (1 L), the pH was adjusted to 7 with phosphoric acid, and the silica filtered and oven-dried prior to use).

### NMR Spectroscopy

Proton nuclear magnetic resonance (<sup>1</sup>H NMR) data were acquired at 400 MHz on a Bruker AVANCEIII-400 spectrometer or at 600 MHz on a Bruker DRX-600 spectrometer. Chemical shifts (δ) are reported in parts per million (ppm) relative to residual chloroform (s, 7.26 ppm), residual benzene (s, 7.16 ppm) or residual CD<sub>3</sub>CN (m, 1.94 ppm). Proton decoupled Carbon-13 nuclear magnetic resonance (<sup>13</sup>C{<sup>1</sup>H} NMR) data were acquired at 101 MHz on a Bruker AVANCEIII-400, at 151 MHz on a Bruker DRX-600 spectrometer or at 201 MHz on an AVANCEII-800. Chemical shifts are reported in ppm relative to residual chloroform (77.16 ppm), residual benzene (128.06 ppm) or residual CD<sub>3</sub>CN (1.32 and 118.26 ppm). Proton decoupled Fluorine-19 nuclear magnetic resonance (<sup>19</sup>F{<sup>1</sup>H} NMR) were acquired at 377 MHz on a Bruker AV400 spectrometer. Proton decoupled Phosphorus-31 nuclear magnetic resonance (<sup>31</sup>P{<sup>1</sup>H} NMR) were acquired at 162 MHz on a Bruker AV400 spectrometer. The assignment of proton and carbon signals was assisted by COSY, HSQC, HMBC and DEPT-135 experiments where necessary. Splitting patterns are designated as s, singlet; d, doublet; t, triplet; q, quartet; p, pentet; dd, doublet of doublets; dt, doublet of triplets; td, triplet of doublets; m, multiplet. All NMR data were recorded at 298 K.

### Infrared Spectroscopy

Infrared (IR) data were recorded on an Alpha-P Bruker FT-IR Spectrometer. Absorbance frequencies are reported in reciprocal centimeters (cm<sup>-1</sup>).

### Mass Spectrometry

HRMS measurements were performed on an Agilent LC-MS TOF (Multimode: ESI + APCI) or Waters Xevo G2-S QTOF (ESI or APPI). High resolution mass are given in *m/z*.

### Melting Points

Melting points were measured on a Büchi B-540 and are uncorrected.

**Enantiomeric excesses**

Enantiomeric excesses were measured on an Agilent HPLC. Optical rotations were measured on a Polartronic M polarimeter using a 0.5 cm cell with a Na 589 nm filter.

**X-Ray analyses**

X-ray analyses of compounds **L6** and **5e** were performed by Dr. R. Scopelliti and Dr. F. Fadaei Tirani at the EPF Lausanne.

## Additional Optimization Experiments

Pd source screening with L10 and Ph<sub>2</sub>MeCCO<sub>2</sub>H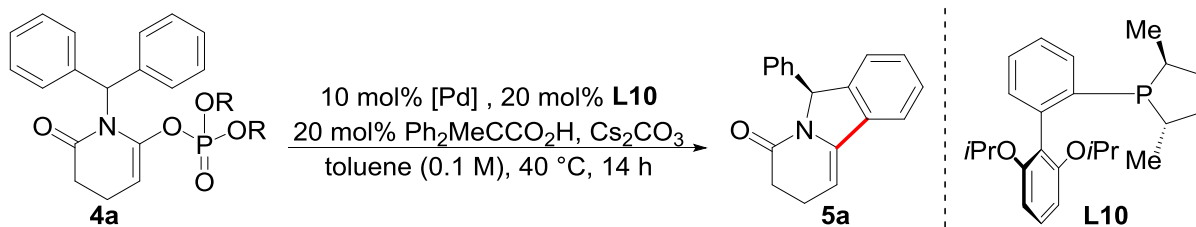

| Entry | [Pd]                 | Conversion | Yield | er        |
|-------|----------------------|------------|-------|-----------|
| 1     | Pd(dba) <sub>2</sub> | 100%       | 82%   | 89:11     |
| 2     | Pd(cinnamyl)Cp       | 62%        | 52%   | 88.5:11.5 |
| 3     | Pd(OAc) <sub>2</sub> | 100%       | 85%   | 71:29     |

## Base screening

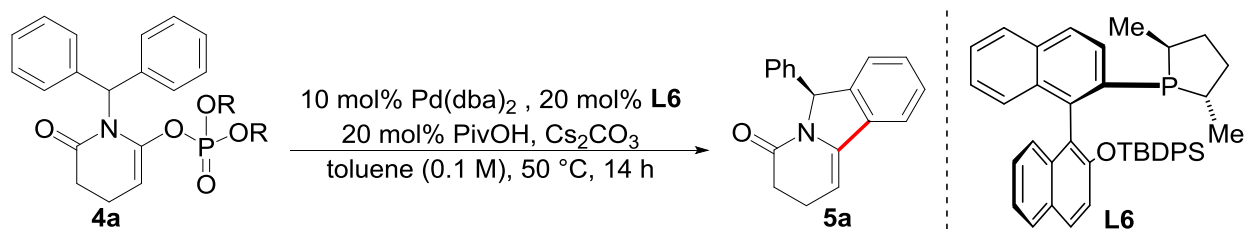

| Entry | Base                            | Conversion | Yield | er        |
|-------|---------------------------------|------------|-------|-----------|
| 1     | Li <sub>2</sub> CO <sub>3</sub> | 30%        | 22%   | 69.5:30.5 |
| 2     | Na <sub>2</sub> CO <sub>3</sub> | 36%        | 30%   | 72.5:27.5 |
| 3     | K <sub>2</sub> CO <sub>3</sub>  | 68%        | 65%   | 87:13     |
| 4     | Cs <sub>2</sub> CO <sub>3</sub> | 76%        | 76%   | 92.5 :7.5 |
| 5     | Tl <sub>2</sub> CO <sub>3</sub> | 84%        | 80%   | 92:8      |



## Acid screening

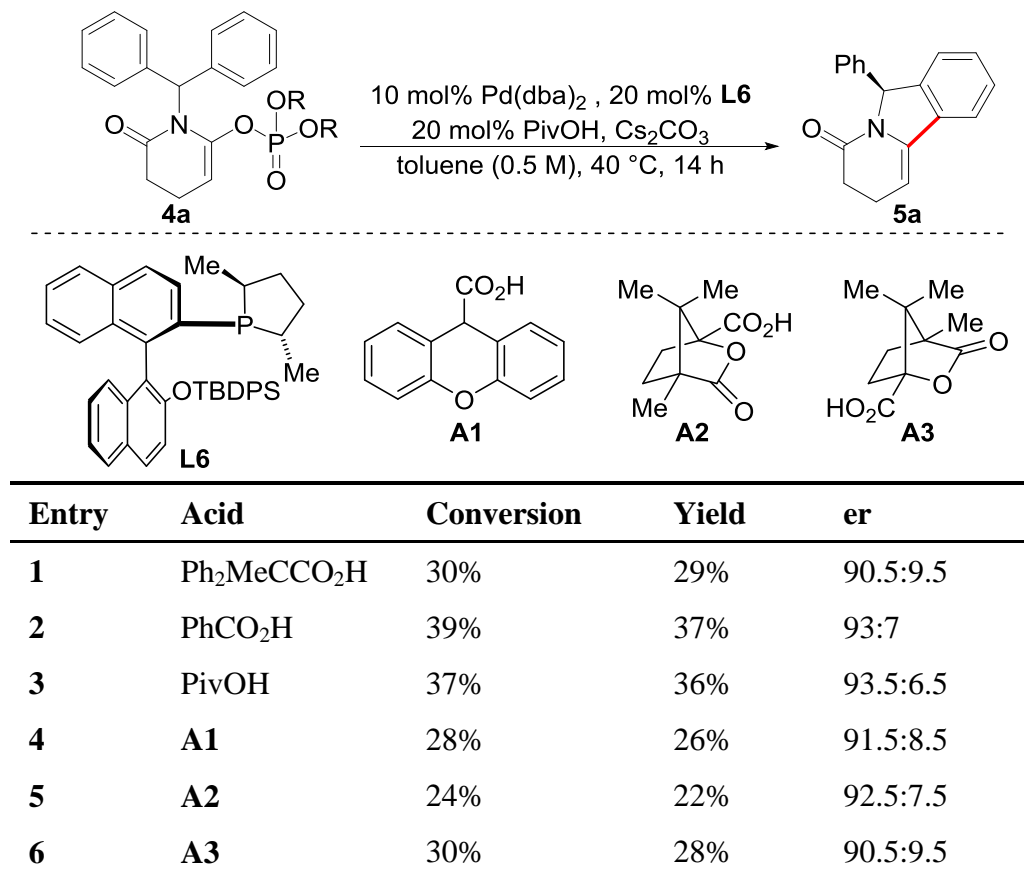

## Relevant Control Experiments

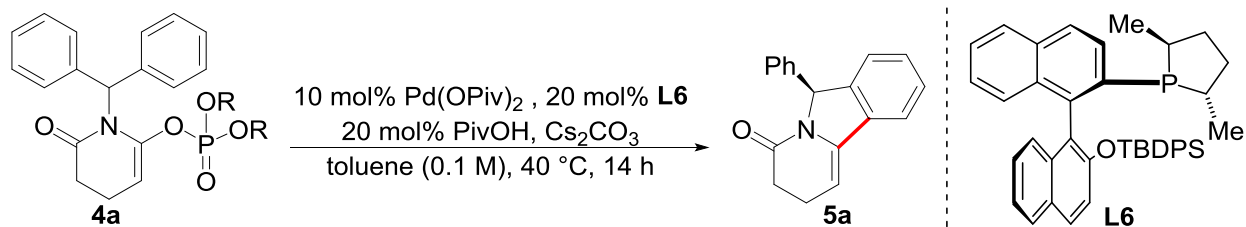

| Entry | Deviation from Standard Conditions | Conversion | Yield | er   |
|-------|------------------------------------|------------|-------|------|
| 1     | —                                  | 100%       | 95%   | 94:6 |
| 2     | no Pd source                       | 0%         | 0%    | —    |
| 3     | no ligand                          | 0%         | 0%    | —    |
| 4     | no PivOH                           | 95%        | 90%   | 92:8 |

## Ligand Screening under Optimized Conditions

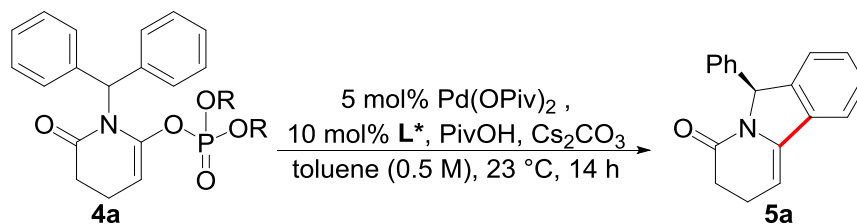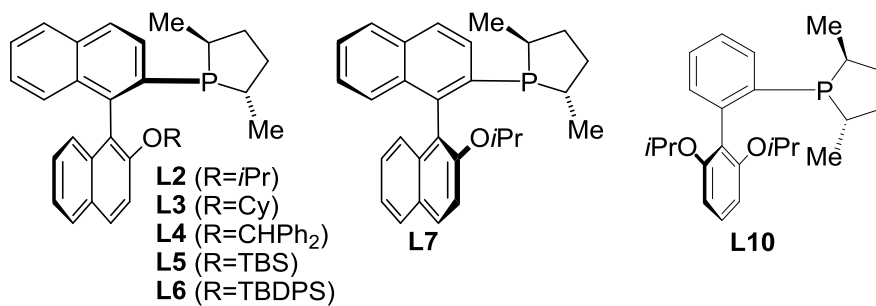

| Entry | Ligand | Conversion | Yield | er         |
|-------|--------|------------|-------|------------|
| 1     | L2     | 60%        | 38%   | 71.5:28.5  |
| 2     | L3     | 67%        | 39%   | 90.5:9.5   |
| 3     | L4     | 82%        | 55%   | 73.5:26.5  |
| 4     | L5     | 18%        | 8%    | nd         |
| 5     | L6     | 100%       | 93%   | 94.5 :5.5  |
| 6     | L7     | 100%       | 72%   | 67.5 :32.5 |
| 7     | L10    | 100%       | 62%   | 83.5:16.5  |

## Experimental Procedures and Characterization Data

## Chiral binaphthyl-substituted phospholane ligands

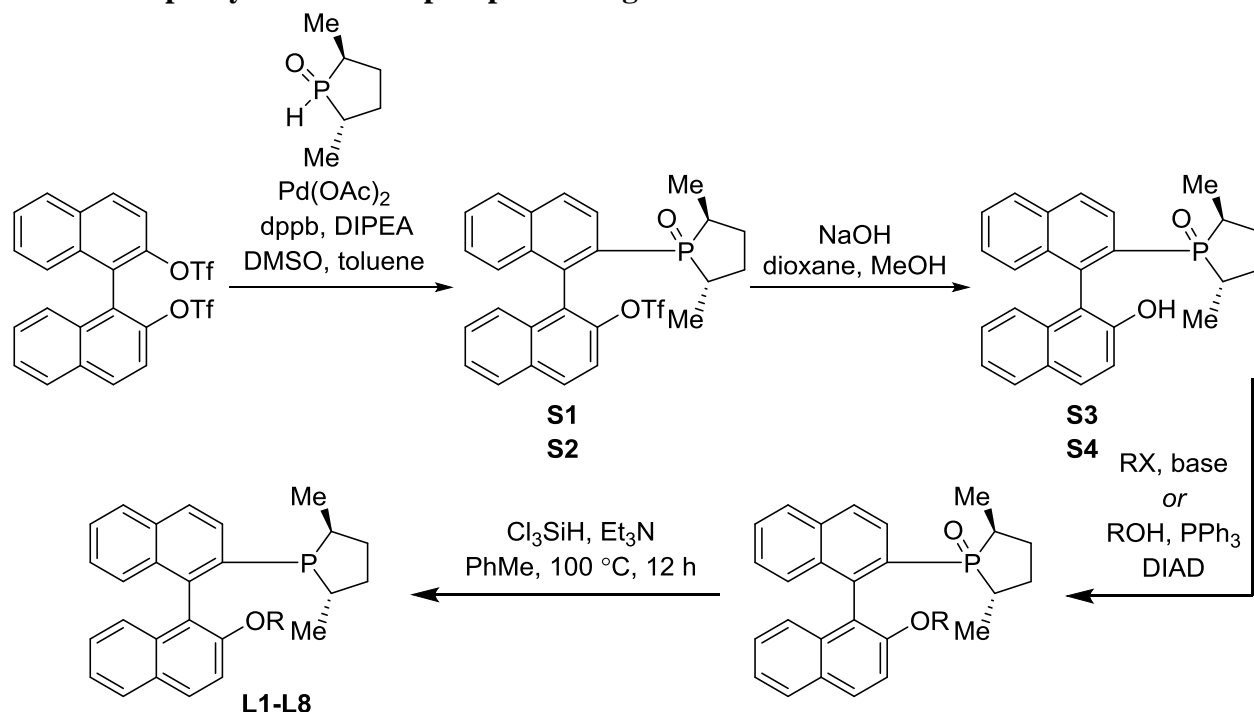**(R)-2'-((2S,5S)-2,5-dimethyl-1-oxidophospholan-1-yl)-[1,1'-binaphthalen]-2-yl trifluoromethanesulfonate:**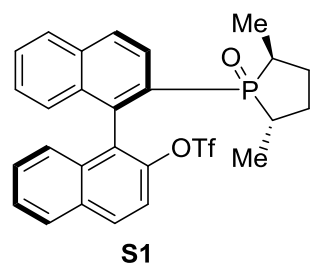

Prepared according to a slight modification of the procedure reported by Buchwald.<sup>1</sup> A 10-20 mL microwave tube was charged with (R)-[1,1'-binaphthalene]-2,2'-diyl bis(trifluoromethanesulfonate) (2.08 g, 3.78 mmol, 1.0 eq.), Pd(OAc)<sub>2</sub> (170 mg, 0.757 mmol, 20 mol%) and 1,4-bis(diphenylphosphino)butane (dppb) (323 mg, 0.757 mmol, 20 mol%). This tube was transferred to a glovebox, (2S,5S)-2,5-dimethylphospholane 1-oxide<sup>2</sup> (1.00 g, 7.57 mmol, 2.0 eq.) and distilled toluene (3.0 mL) were added, the tube was closed and taken out of the glovebox. Freshly distilled *N,N*-diisopropylethylamine (DIPEA) (2.6 mL, 15.1 mmol, 4.0 eq.) and DMSO (5.0 mL) were added by syringe. The tube was sealed and the reaction was stirred for 48 h at 110 °C. The resulting mixture was cooled down to room temperature and diluted with EtOAc (70 mL). The organic phase was washed with water (4\*50 mL) and brine, dried over MgSO<sub>4</sub> and concentrated under reduced pressure. Purification *via* flash chromatography (SiO<sub>2</sub>, EtOAc) yielded (R)-2'-((2S,5S)-2,5-dimethyl-1-oxidophospholan-1-yl)-[1,1'-binaphthalen]-2-yl trifluoromethanesulfonate (**S1**) (1.49 g, 2.80 mmol, 74%).

**Appearance:** pale brown foam; **R<sub>f</sub>**: 0.2 (EtOAc); <sup>1</sup>H NMR (400 MHz, CDCl<sub>3</sub>): δ 8.12–8.01 (m, 2 H), 7.96 (d, *J* = 8.4 Hz, 2 H), 7.63–7.42 (m, 4 H), 7.38–7.20 (m, 3 H), 7.12 (d, *J* = 8.5 Hz, 1 H), 2.33–1.99 (m, 4 H), 1.63–1.39 (m, 2 H), 1.17 (dd, *J* = 7.1, 16.3 Hz, 3 H), 0.86 (dd, *J* = 6.8, 14.7 Hz, 3 H) ppm; <sup>13</sup>C{<sup>1</sup>H} NMR (101 MHz, CDCl<sub>3</sub>): 145.6, 138.5 (d, *J* = 4.3 Hz), 134.6, 134.4 (d, *J* = 2.4 Hz), 133.5 (d, *J* = 10.1 Hz), 132.1, 130.7, 129.2 (d, *J* = 3.7 Hz), 128.8 (d, *J* = 11.8 Hz),

128.6, 128.4, 128.0, 127.4, 127.35, 127.3, 126.7, 126.6, 126.0 (d,  $J = 12.5$  Hz), 119.8, 119.3, 116.6, 39.6 (d,  $J = 66.2$  Hz), 36.5 (d,  $J = 68.2$  Hz), 34.0 (d,  $J = 9.1$  Hz), 32.5 (d,  $J = 8.3$  Hz), 14.2, 12.1 (d,  $J = 2.8$  Hz) ppm;  $^{19}\text{F}\{^1\text{H}\}$  NMR (376 MHz,  $\text{CDCl}_3$ ):  $\delta$  -74.9 ppm;  $^{31}\text{P}\{^1\text{H}\}$  NMR (162 MHz,  $\text{CDCl}_3$ ):  $\delta$  59.7 ppm; IR (ATR):  $\nu_{\text{max}} = 3060, 2959, 2932, 2871, 1453, 1417, 1212, 1181, 1139, 956, 940, 834, 810, 748, 685, 499$   $\text{cm}^{-1}$ ; HRMS (Multimode): calculated for  $[\text{C}_{27}\text{H}_{24}\text{F}_3\text{O}_4\text{PS} + \text{H}]^+$ : 533.1158, found: 533.1157;  $[\alpha]_{\text{D}}^{20}$ : 62.3 ( $c = 1.0$ ,  $\text{CHCl}_3$ ).

**(S)-2'-((2S,5S)-2,5-dimethyl-1-oxidophospholan-1-yl)-[1,1'-binaphthalen]-2-yl trifluoromethanesulfonate:**

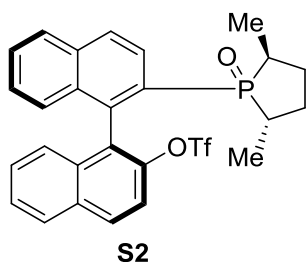

Prepared according to a slight modification of the procedure reported by Buchwald.<sup>1</sup> A 10-20 mL microwave tube was charged with (S)-[1,1'-binaphthalene]-2,2'-diyl bis(trifluoromethanesulfonate) (1.10 g, 2.00 mmol, 1.0 eq.),  $\text{Pd}(\text{OAc})_2$  (90.0 mg, 0.400 mmol, 20 mol%) and 1,4-bis(diphenylphosphino)butane (dppb) (171 mg, 0.400 mmol, 20 mol%). This tube was transferred to a glovebox, and (2S,5S)-2,5-dimethylphospholane 1-oxide (529 mg, 4.00 mmol, 2.0 eq.) and distilled toluene (2.0 mL) were added, the tube was closed. Freshly distilled *N,N*-diisopropylethylamine (DIPEA) (1.4 mL, 8.00 mmol, 4.0 eq.) and DMSO (3.0 mL) were added by syringe. The tube was sealed and the reaction was stirred for 48 h at 110 °C. The resulting mixture was cooled down to room temperature and diluted with EtOAc (70 mL). The organic phase was washed with water (4\*30 mL) and brine, dried over  $\text{MgSO}_4$  and concentrated under reduced pressure. Purification *via* flash chromatography ( $\text{SiO}_2$ , EtOAc) yielded (S)-2'-((2S,5S)-2,5-dimethyl-1-oxidophospholan-1-yl)-[1,1'-binaphthalen]-2-yl trifluoromethanesulfonate (**S2**) (619 mg, 1.16 mmol, 58%).

**Appearance:** white foam; **R<sub>f</sub>**: 0.2 (EtOAc);  $^1\text{H}$  NMR (400 MHz,  $\text{C}_6\text{D}_6$ ):  $\delta$  7.70 (ddd,  $J = 0.9, 2.4, 8.7$  Hz, 1 H), 7.62 (d,  $J = 8.2$  Hz, 1 H), 7.56–7.46 (m, 3 H), 7.36 (dd,  $J = 1.0, 8.5$  Hz, 1 H), 7.21–7.07 (m, 4 H), 6.98–6.91 (m, 2 H), 1.95–1.83 (m, 1 H), 1.81–1.47 (m, 3 H), 1.30 (dd,  $J = 6.9, 14.5$  Hz, 3 H), 1.30–1.17 (m, 1 H), 1.01–0.88 (m, 1 H), 0.74 (dd,  $J = 7.3, 15.8$  Hz, 3 H) ppm;  $^{13}\text{C}\{^1\text{H}\}$  NMR (101 MHz,  $\text{C}_6\text{D}_6$ ):  $\delta$  145.5, 138.7 (d,  $J = 4.0$  Hz), 134.63, 134.60, 134.01 (d,  $J = 9.9$  Hz), 132.6, 130.6, 129.8, 129.2 (d,  $J = 3.7$  Hz), 128.80, 128.7 (d,  $J = 11.4$  Hz), 128.2, 127.9, 127.5, 127.2, 126.9, 126.40, 126.3 (d,  $J = 12.1$  Hz), 120.4, 120.1, 117.2, 39.7 (d,  $J = 66.8$  Hz), 35.5 (d,  $J = 67.9$  Hz), 33.4 (d,  $J = 9.5$  Hz), 32.8 (d,  $J = 8.1$  Hz), 14.3, 12.8 (d,  $J = 2.6$  Hz) ppm;  $^{19}\text{F}\{^1\text{H}\}$  NMR (376 MHz,  $\text{C}_6\text{D}_6$ ):  $\delta$  -75.5 ppm;  $^{31}\text{P}\{^1\text{H}\}$  NMR (162 MHz,  $\text{C}_6\text{D}_6$ ):  $\delta$  56.9 ppm; IR (ATR):  $\nu_{\text{max}} = 3059, 2961, 2932, 2872, 1624, 1586, 1560, 1509, 1454, 1416, 1247, 1211, 1180, 1138, 747, 686$   $\text{cm}^{-1}$ ; HRMS (Multimode): calculated for  $[\text{C}_{27}\text{H}_{24}\text{F}_3\text{O}_4\text{PS} + \text{H}]^+$ : 533.1158, found: 533.1156;  $[\alpha]_{\text{D}}^{20}$ : 43.2 ( $c = 1.0$ ,  $\text{CHCl}_3$ ).

**(2S,5S)-1-((R)-2'-Hydroxy-[1,1'-binaphthalen]-2-yl)-2,5-dimethylphospholane 1-oxide:**

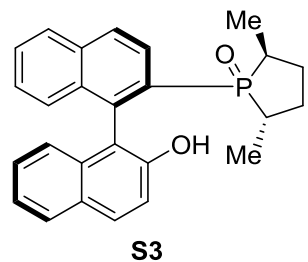

To a solution of triflate **S1** (1.49 g, 2.80 mmol, 1.0 eq.) in a mixture of dioxane:MeOH (2:1, 30 mL) was added 4 M aqueous solution of NaOH (7.7 mL, 30.8 mmol, 11 eq.) at 23 °C. The resulting mixture was kept stirring overnight at this temperature. Then, the mixture was acidified ( $\text{pH} = 1$ ) by the addition of concentrated HCl (aqueous) and product was extracted with EtOAc (50 mL). The organic fraction was dried over  $\text{MgSO}_4$  and concentrated under reduced pressure to yield (2S,5S)-1-((R)-2'-hydroxy-[1,1'-binaphthalen]-2-yl)-2,5-dimethylphospholane 1-

oxide (**S3**) (1.12 g, 2.80 mmol, 100%) which was used in the next step without further purification.

**Appearance:** pale brown foam;  $^1\text{H}$  NMR (400 MHz,  $\text{CD}_3\text{CN}$ ):  $\delta$  8.28–8.20 (m, 1 H), 8.10 (d,  $J$  = 8.2 Hz, 1 H), 8.0 (d,  $J$  = 9.0 Hz, 1 H), 7.95–7.89 (m, 1 H), 7.77 (dd,  $J$  = 8.7, 11.1 Hz, 1 H), 7.72–7.67 (m, 1 H), 7.44–7.38 (m, 1 H), 7.38–7.28 (m, 1 H + 1 H), 7.26–7.15 (m, 2 H), 6.83–6.78 (m, 1 H), 2.13–1.99 (m, 1 H), 1.91–1.70 (m, 3 H), 0.99 (dd,  $J$  = 7.2, 18.4 Hz, 3 H), 0.98–0.85 (m, 1 H), 0.87 (dd,  $J$  = 6.7, 16.3 Hz, 3 H) ppm;  $^{13}\text{C}\{^1\text{H}\}$  NMR (101 MHz,  $\text{CD}_3\text{CN}$ ):  $\delta$  153.5, 143.0 (d,  $J$  = 7.7 Hz), 136.6 (d,  $J$  = 2.6 Hz), 135.5, 134.2 (d,  $J$  = 2.6 Hz), 131.7, 130.5, 129.8 (d,  $J$  = 12.5 Hz), 129.4, 129.3, 129.2, 128.9, 128.0, 127.8 (d,  $J$  = 12.5 Hz), 127.6, 125.3, 124.6, 118.8, 117.1 (d,  $J$  = 4.0 Hz), 37.8 (d,  $J$  = 62.0 Hz), 34.2 (d,  $J$  = 63.8 Hz), 32.5 (d,  $J$  = 10.3 Hz), 31.9 (d,  $J$  = 8.8 Hz), 14.6, 12.2 (d,  $J$  = 4.0 Hz) ppm;  $^{31}\text{P}\{^1\text{H}\}$  NMR (162 MHz,  $\text{CD}_3\text{CN}$ ):  $\delta$  87.2 ppm; **HRMS** (Multimode): calculated for  $[\text{C}_{26}\text{H}_{25}\text{O}_2\text{P} + \text{H}]^+$ : 401.1665, found: 401.1663.

**(2*S*,5*S*)-1-((*S*)-2'-Hydroxy-[1,1'-binaphthalen]-2-yl)-2,5-dimethylphospholane 1-oxide:**

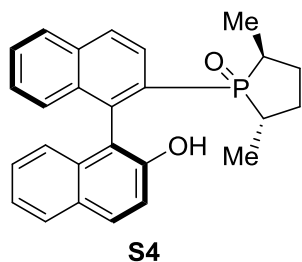

To a solution of triflate **S2** (586 mg, 1.10 mmol, 1.0 eq.) in a mixture of dioxane:MeOH (2:1, 10 mL) was added 4 M aqueous solution of NaOH (3.0 mL, 12.1 mmol, 11 eq.) at 23 °C. The resulting mixture was kept stirring overnight at this temperature. Then, the mixture was acidified (pH = 1) by the addition of concentrated HCl (aqueous) and product was extracted with EtOAc (20 mL). The organic fraction was dried over  $\text{MgSO}_4$  and concentrated under reduced pressure to yield crude (2*S*,5*S*)-1-((*S*)-2'-hydroxy-[1,1'-binaphthalen]-2-yl)-2,5-dimethylphospholane 1-

oxide (**S4**) (381 mg, 0.953 mmol, 87%) which was used in the next step without further purification.

**Appearance:** Pale brown foam;  $^1\text{H}$  NMR (400 MHz,  $\text{CD}_3\text{CN}$ ):  $\delta$  8.33 – 8.29 (m, 1 H), 8.19–7.88 (m, 9 H), 7.74 – 7.69 (m, 1 H), 7.50 – 7.16 (m, 5 H), 6.89–6.77 (m, 1H), 2.65 – 2.50 (m, 1 H), 2.32–2.11 (m, 1 H), 2.01–1.81 (m, 1 H), 1.52–1.17 (m, 1 H), 1.05 (dd,  $J$  = 7.3, 19.3 Hz, 3 H), 0.39 (ddd,  $J$  = 1.8, 6.8 17.1 Hz, 3 H) ppm;  $^{13}\text{C}\{^1\text{H}\}$  NMR (101 MHz,  $\text{CD}_3\text{CN}$ ):  $\delta$  155.6, 140.5, 135.6, 134.0, 132.6, 131.5, 131.4, 131.2, 131.0, 130.4, 129.7, 129.62, 129.14, 129.05, 128.9, 128.4, 128.3, 127.9, 127.6, 127.3, 125.7, 124.5, 121.5, 114.0, 56.5, 55.3, 40.8, 40.1, 34.7, 34.0, 33.2, 33.1, 30.3, 14.6, 12.5, 12.44 ppm;  $^{31}\text{P}\{^1\text{H}\}$  NMR (162 MHz,  $\text{CD}_3\text{CN}$ ):  $\delta$  87.2 ppm; **HRMS** (Multimode): calculated for  $[\text{C}_{26}\text{H}_{25}\text{O}_2\text{P} + \text{H}]^+$ : 401.1665, found: 401.1661.

**(2*S*,5*S*)-1-((*R*)-2'-methoxy-[1,1'-binaphthalen]-2-yl)-2,5-dimethylphospholane:**

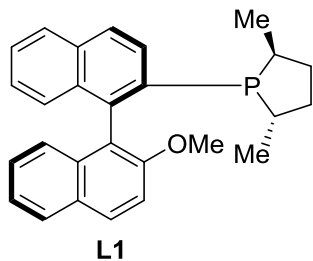

A mixture of (2*S*,5*S*)-1-((*R*)-2'-hydroxy-[1,1'-binaphthalen]-2-yl)-2,5-dimethylphospholane 1-oxide (**S3**) (75.0 mg, 0.187 mmol, 1.0 eq),  $\text{K}_2\text{CO}_3$  (104 mg, 0.749 mmol, 4.0 eq) and MeI (47  $\mu\text{L}$ , 0.749 mmol, 4.0 eq) in acetone (0.94 mL, 0.2 M) was stirred for 10 h at 50 °C. The reaction mixture was cooled down, filtered through celite (eluting with  $\text{Et}_2\text{O}$ ) and concentrated under reduced pressure to give (2*S*,5*S*)-1-((*R*)-2'-methoxy-[1,1'-binaphthalen]-2-yl)-2,5-dimethylphospholane 1-oxide (66.0 mg, 0.159 mmol, 85%), which was used in the next step without

further purification.

A 10–20 mL microwave vial was transferred to a glovebox and charged with a solution of (2*S*,5*S*)-1-((*R*)-2'-methoxy-[1,1'-binaphthalen]-2-yl)-2,5-dimethylphospholane 1-oxide (66.0 mg, 0.159 mmol, 1.0 eq) in toluene (3.2 mL, 0.05 M). The tube was sealed and taken out of the glovebox. To this solution was added  $\text{Et}_3\text{N}$  (0.71 mL, 5.10 mmol, 32 eq), and the resulting

mixture was cooled down to 0 °C. Trichlorosilane (Cl<sub>3</sub>SiH) (0.13 mL, 1.27 mmol, 8.0 eq) was added at this temperature, the tube was sealed, heated to 100 °C and the reaction was stirred for 10 h at this temperature. After this time the mixture was cooled down, diluted with Et<sub>2</sub>O (5.0 mL), quenched with saturated NaHCO<sub>3</sub> (2.0 mL) and filtered through celite (eluting with Et<sub>2</sub>O). The resulting filtrate was concentrated under reduced pressure and subjected to silica gel chromatography (pentane/EtOAc, 10:1) to afford (2*S*,5*S*)-1-((*R*)-2'-methoxy-[1,1'-binaphthalen]-2-yl)-2,5-dimethylphospholane (**L1**) (40.0 mg, 0.100 mmol, 63%).

**Appearance:** white foam; **R<sub>f</sub>**: 0.6 (pentane:EtOAc, 10:1); **<sup>1</sup>H NMR** (400 MHz, C<sub>6</sub>D<sub>6</sub>): δ 7.84–7.68 (m, 5 H), 7.46 (d, *J* = 8.5 Hz, 1 H) 7.26–7.17 (m, 3 H), 7.08–6.94 (m, 3 H), 3.21 (s, 3 H), 2.63–2.50 (m, 1 H), 2.24–2.08 (m, 1 H), 2.07–1.84 (m, 2 H), 1.79–1.61 (m, 1 H), 1.15 (dd, *J* = 7.1, 9.1 Hz, 3 H), 1.12–1.06 (m, 1 H), 1.00 (dd, *J* = 7.1, 18.1 Hz, 3 H) ppm; **<sup>13</sup>C{<sup>1</sup>H} NMR** (101 MHz, CDCl<sub>3</sub>): δ 155.2 (d, *J* = 2.2 Hz), 144.4, 144.1, 137.1, 138.8, 135.3, 134.4, 133.9 (d, *J* = 7.3 Hz), 131.1 (d, *J* = 3.7 Hz), 129.6, 129.4, 128.7, 127.4 (d, *J* = 2.6 Hz), 127.2, 126.7 (d, *J* = 2.2 Hz), 126.5, 126.1, 123.8 (d, *J* = 9.5 Hz), 123.7, 113.0, 55.4, 39.0 (d, *J* = 11.7 Hz), 38.3 (d, *J* = 2.2 Hz), 37.5 (d, *J* = 2.9 Hz), 35.4 (d, *J* = 14.3 Hz), 20.4 (d, *J* = 36.7 Hz), 16.0 (d, *J* = 2.2 Hz) ppm; **<sup>31</sup>P{<sup>1</sup>H} NMR** (162 MHz, C<sub>6</sub>D<sub>6</sub>): δ -2.9 ppm; **IR** (ATR): ν<sub>max</sub> = 3054, 2922, 2858, 1736, 1593, 1509, 1456, 1345, 1268, 1249, 1147, 1080, 1020, 908, 809, 746 cm<sup>-1</sup>; **HRMS** (Multimode): calculated for [C<sub>27</sub>H<sub>27</sub>OP + H]<sup>+</sup>: 399.1872, found: 399.1876; [α]<sub>D</sub><sup>20</sup>: 55.3 (c = 0.6, CHCl<sub>3</sub>).

**(2*S*,5*S*)-1-((*R*)-2'-isopropoxy-[1,1'-binaphthalen]-2-yl)-2,5-dimethylphospholane:**

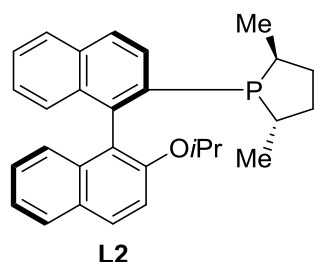

A mixture of (2*S*,5*S*)-1-((*R*)-2'-hydroxy-[1,1'-binaphthalen]-2-yl)-2,5-dimethylphospholane 1-oxide (**S3**) (120 mg, 0.300 mmol, 1.0 eq), K<sub>2</sub>CO<sub>3</sub> (166 mg, 1.20 mmol, 4.0 eq) and *i*PrI (204 mg, 1.20 mmol, 4.0 eq) in acetone (1.5 mL, 0.2 M) was stirred for 10 h at 50 °C. The reaction mixture was cooled down, filtered through celite (eluting with Et<sub>2</sub>O) and concentrated under reduced pressure to give (2*S*,5*S*)-1-((*R*)-2'-isopropoxy-[1,1'-binaphthalen]-2-yl)-2,5-dimethylphospholane 1-oxide (128 mg, 0.289 mmol, 96%), which was used in the next step

without further purification.

A 10-20 mL microwave vial was transferred to a glovebox and charged with a solution of (2*S*,5*S*)-1-((*R*)-2'-isopropoxy-[1,1'-binaphthalen]-2-yl)-2,5-dimethylphospholane 1-oxide (125 mg, 0.281 mmol, 1.0 eq) in toluene (5.6 mL, 0.05 M). The tube was sealed and taken out of the glovebox. To this solution was added Et<sub>3</sub>N (1.3 mL, 9.02 mmol, 32 eq), and the resulting mixture was cooled down to 0 °C. Trichlorosilane (Cl<sub>3</sub>SiH) (0.23 mL, 2.26 mmol, 8.0 eq) was added at this temperature, the tube was sealed, heated to 100 °C and the reaction was stirred for 10 h at this temperature. After this time the mixture was cooled down, diluted with Et<sub>2</sub>O (8.0 mL), quenched with saturated NaHCO<sub>3</sub> (4.0 mL) and filtered through celite (eluting with Et<sub>2</sub>O). The resulting filtrate was concentrated under reduced pressure and subjected to silica gel chromatography (pentane: CH<sub>2</sub>Cl<sub>2</sub>, 2:1) to afford (2*S*,5*S*)-1-((*R*)-2'-isopropoxy-[1,1'-binaphthalen]-2-yl)-2,5-dimethylphospholane (**L2**) (92.0 mg, 0.216 mmol, 76%).

**Appearance:** yellow oil; **R<sub>f</sub>**: 0.5 (pentane:EtOAc, 20:1); **<sup>1</sup>H NMR** (400 MHz, C<sub>6</sub>D<sub>6</sub>): δ 7.84–7.70 (m, 5 H), 7.43–7.38 (m, 1 H), 7.26–7.21 (m, 1 H), 7.19–7.12 (m, 3 H), 7.06–6.97 (m, 2 H), 4.32–4.21 (m, 1 H), 2.60–2.48 (m, 1 H), 2.32–2.15 (m, 1 H), 2.09–1.86 (m, 2 H), 1.78–1.60 (m, 1 H), 1.22 (dd, *J* = 7.3, 9.4 Hz, 3 H), 1.16–1.03 (m, 1 H), 1.03–0.90 (m, 3 H + 3 H), 0.73 (d, *J* = 6.0 Hz, 3 H) ppm; **<sup>13</sup>C{<sup>1</sup>H} NMR** (101 MHz, C<sub>6</sub>D<sub>6</sub>): δ 153.6 (d, *J* = 2.2 Hz), 144.6 (d, *J* = 34.8 Hz), 137.3 (d, *J* = 28.6 Hz), 135.8, 135.7, 134.2, 133.7 (d, *J* = 7.3 Hz), 131.2 (d, *J* = 3.7 Hz), 129.43, 129.37, 128.20, 128.16, 127.9, 127.6 (d, *J* = 2.6 Hz), 127.1, 126.5 (d, *J* = 2.9 Hz), 126.2, 125.2

(d,  $J = 9.2$  Hz), 123.7, 115.7, 70.3, 39.4 (d,  $J = 11.7$  Hz), 38.5 (d,  $J = 2.2$  Hz), 37.5 (d,  $J = 3.3$  Hz), 35.2 (d,  $J = 14.3$  Hz), 22.5, 22.1, 20.3 (d,  $J = 36.7$  Hz), 16.3 (d,  $J = 2.2$  Hz) ppm;  $^{31}\text{P}\{^1\text{H}\}$  NMR (162 MHz,  $\text{C}_6\text{D}_6$ ):  $\delta$  -3.1 ppm; **IR** (ATR):  $\nu_{\text{max}} = 3054, 2973, 2920, 2279, 1621, 1591, 1507, 1452, 1326, 1241, 1112, 1001, 809, 745, 499$   $\text{cm}^{-1}$ ; **HRMS** (Multimode): calculated for  $[\text{C}_{29}\text{H}_{31}\text{OP} + \text{H}]^+$ : 427.2185, found: 427.2188;  $[\alpha]_{\text{D}}^{20}$ : 249.9 ( $c = 1.0$ ,  $\text{CHCl}_3$ ).

**(2*S*,5*S*)-1-((*R*)-2'-cyclohexyloxy-[1,1'-binaphthalen]-2-yl)-2,5-dimethylphospholane:**

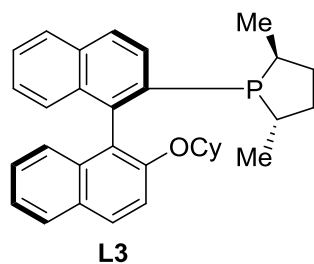

A solution of diisopropyl azodicarboxylate (DIAD) (152 mg, 0.750 mmol, 1.5 eq) in THF (4 mL, 0.19 M) was added dropwise via a syringe to a stirring solution of cyclohexanol (460 mg, 2.50 mmol, 5 eq), (2*S*,5*S*)-1-((*R*)-2'-hydroxy-[1,1'-binaphthalen]-2-yl)-2,5-dimethylphospholane 1-oxide (**S3**) (200 mg, 0.500 mmol) and  $\text{PPh}_3$  (196 mg, 0.750 mmol) in THF (2 mL, 0.25 M) at 0 °C. After stirring for 45 h at 23 °C, the reaction mixture was diluted with EtOAc (50 mL), washed with water (2\*25 mL), brine, dried over  $\text{MgSO}_4$  and concentrated under reduced pressure. Purification *via* flash chromatography ( $\text{SiO}_2$ , pure EtOAc  $\rightarrow$  EtOAc:MeOH, 100:1) yielded (2*S*,5*S*)-1-((*R*)-2'-cyclohexyloxy-[1,1'-binaphthalen]-2-yl)-2,5-dimethylphospholane 1-oxide (101 mg, 0.209 mmol, 42%).

A 2-5 mL microwave vial was transferred to a glovebox and charged with a solution of (2*S*,5*S*)-1-((*R*)-2'-cyclohexyloxy-[1,1'-binaphthalen]-2-yl)-2,5-dimethylphospholane 1-oxide (50 mg, 0.110 mmol, 1.0 eq) in toluene (2.20 mL, 0.05 M). The tube was sealed and taken out of the glovebox. To this solution was added  $\text{Et}_3\text{N}$  (491  $\mu\text{L}$ , 3.52 mmol, 32 eq), and the resulting mixture was cooled down to 0 °C. Trichlorosilane ( $\text{Cl}_3\text{SiH}$ ) (89.0  $\mu\text{L}$ , 0.880 mmol, 8.0 eq) was added at this temperature, the tube was sealed, heated to 100 °C and the reaction was stirred for 10 h at this temperature. After this time the mixture was cooled down, diluted with  $\text{Et}_2\text{O}$  (2.0 mL), quenched with saturated  $\text{NaHCO}_3$  (1.0 mL) and filtered through celite (eluting with  $\text{Et}_2\text{O}$ ). The resulting filtrate was concentrated under reduced pressure and subjected to silica gel chromatography (pentane:  $\text{CH}_2\text{Cl}_2$ , 2:1) to afford (2*S*,5*S*)-1-((*R*)-2'-cyclohexyloxy-[1,1'-binaphthalen]-2-yl)-2,5-dimethylphospholane (**L3**) (36.0 mg, 0.080 mmol, 73%).

**Appearance:** white foam; **R<sub>f</sub>**: 0.25 (pentane:  $\text{CH}_2\text{Cl}_2$ , 3:1);  $^1\text{H}$  NMR (400 MHz,  $\text{C}_6\text{D}_6$ ):  $\delta$  7.83–7.70 (m, 5 H), 7.44 – 7.39 (m, 1 H), 7.27–7.17 (m, 4 H), 7.08–6.97 (m, 2 H), 4.11 – 4.02 (m, 1 H), 2.59 – 2.47 (m, 1 H), 2.36 – 2.18 (m, 1 H), 2.09–1.87 (m, 2 H), 1.84–1.63 (m, 2 H), 1.56–1.44 (m, 1 H), 1.41–1.06 (m, 8 H), 1.04–0.64 (m, 7 H) ppm;  $^{13}\text{C}\{^1\text{H}\}$  NMR (101 MHz,  $\text{C}_6\text{D}_6$ ):  $\delta$  153.6 (d,  $J = 2.2$  Hz), 144.6 (d,  $J = 34.5$  Hz), 137.4 (d,  $J = 28.6$  Hz), 135.8 (d,  $J = 2.6$  Hz), 134.2, 133.7 (d,  $J = 7.3$  Hz), 131.3 (d,  $J = 3.7$  Hz), 129.4, 129.3, 128.20, 128.18, 127.9, 127.1, 126.6, 126.5, 126.2, 126.1, 125.2 (d,  $J = 9.2$  Hz), 123.7, 116.0, 75.9, 39.5 (d,  $J = 11.4$  Hz), 38.5 (d,  $J = 2.2$  Hz), 37.5 (d,  $J = 3.3$  Hz), 35.3 (d,  $J = 14.3$  Hz), 32.8, 31.9, 25.6, 23.9, 23.7, 20.4 (d,  $J = 36.7$  Hz), 16.3 (d,  $J = 2.2$  Hz) ppm;  $^{31}\text{P}\{^1\text{H}\}$  NMR (162 MHz,  $\text{C}_6\text{D}_6$ ):  $\delta$  -3.1 ppm; **IR** (ATR):  $\nu_{\text{max}} = 3054, 2930, 2857, 1452, 1330, 1236, 1071, 1048, 1021, 812, 745, 684$   $\text{cm}^{-1}$ ; **HRMS** (Multimode): calculated for  $[\text{C}_{32}\text{H}_{35}\text{OP} + \text{H}]^+$ : 467.2498, found: 467.2497;  $[\alpha]_{\text{D}}^{20}$ : 167.0 ( $c = 1.0$ ,  $\text{CHCl}_3$ ).

**(2*S*,5*S*)-1-((*R*)-2'-benzhydryloxy-[1,1'-binaphthalen]-2-yl)-2,5-dimethylphospholane:**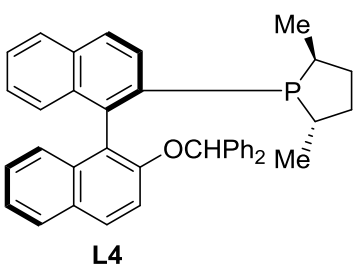

A solution of diisopropyl azodicarboxylate (DIAD) (152 mg, 0.750 mmol, 1.5 eq) in THF (4.0 mL, 0.19 M) was added dropwise via a syringe to a stirring solution of diphenylmethanol (460 mg, 2.50 mmol, 5 eq), (2*S*,5*S*)-1-((*R*)-2'-hydroxy-[1,1'-binaphthalen]-2-yl)-2,5-dimethylphospholane 1-oxide (**S3**) (200 mg, 0.500 mmol) and PPh<sub>3</sub> (196 mg, 0.750 mmol) in THF (5.0 mL, 0.1 M) at 0 °C. After stirring for 45 h at 23 °C, the reaction mixture was diluted with EtOAc (50 mL), washed with water (2\*25 mL), brine, dried over MgSO<sub>4</sub> and concentrated under reduced pressure. Purification *via* flash chromatography (SiO<sub>2</sub>, pure EtOAc → EtOAc:MeOH, 100:1) yielded (2*S*,5*S*)-1-((*R*)-2'-benzhydryloxy-[1,1'-binaphthalen]-2-yl)-2,5-dimethylphospholane 1-oxide (107 mg, 0.189 mmol, 38%).

A 2-5 mL microwave vial was transferred to a glovebox and charged with a solution of (2*S*,5*S*)-1-((*R*)-2'-benzhydryloxy-[1,1'-binaphthalen]-2-yl)-2,5-dimethylphospholane 1-oxide (50 mg, 0.090 mmol, 1.0 eq) in toluene (1.8 mL, 0.05 M). The tube was sealed and taken out of the glovebox. To this solution was added Et<sub>3</sub>N (0.40 mL, 2.88 mmol, 32 eq), and the resulting mixture was cooled down to 0 °C. Trichlorosilane (Cl<sub>3</sub>SiH) (73 µL, 0.720 mmol, 8.0 eq) was added at this temperature, the tube was sealed, heated to 100 °C and the reaction was stirred for 10 h at this temperature. After this time the mixture was cooled down, diluted with Et<sub>2</sub>O (2.0 mL), quenched with saturated NaHCO<sub>3</sub> (1.0 mL) and filtered through celite (eluting with Et<sub>2</sub>O). The resulting filtrate was concentrated under reduced pressure and subjected to silica gel chromatography (pentane: CH<sub>2</sub>Cl<sub>2</sub>, 2:1) to afford 2(2*S*,5*S*)-1-((*R*)-2'-benzhydryloxy-[1,1'-binaphthalen]-2-yl)-2,5-dimethylphospholane (**L4**) (37.0 mg, 0.067 mmol, 75%).

**Appearance:** colorless oil; **R<sub>f</sub>**: 0.15 (pentane: CH<sub>2</sub>Cl<sub>2</sub>, 3:1); **<sup>1</sup>H NMR** (400 MHz, C<sub>6</sub>D<sub>6</sub>): δ 7.85–7.74 (m, 3 H), 7.66–7.56 (m, 2 H), 7.44–7.40 (m, 1 H), 7.31–7.19 (m, 3 H), 7.15–7.10 (m, 3 H), 7.07–6.94 (m, 6 H), 6.94–6.82 (m, 4 H), 6.13 (s, 1 H), 2.56–2.44 (m, 1 H), 2.26–2.10 (m, 1 H), 2.05–1.80 (m, 2 H), 1.75–1.60 (m, 1 H), 1.14–1.01 (m, 1 H), 1.01–0.91 (m, 6 H) ppm; **<sup>13</sup>C{<sup>1</sup>H} NMR** (101 MHz, C<sub>6</sub>D<sub>6</sub>): δ 153.6 (d, *J* = 2.2 Hz), 144.2 (d, *J* = 34.8 Hz), 142.4, 142.2, 137.7 (d, *J* = 29.0 Hz), 135.6 (d, *J* = 2.9 Hz), 134.2, 133.7 (d, *J* = 7.3 Hz), 131.53, 131.49, 129.6, 129.3, 128.51 (2 C), 128.45 (2 C), 128.2, 127.9, 127.6, 127.5, 127.2, 126.93 (2 C), 126.86 (2 C), 126.7, 126.6, 126.3, 126.2, 125.1 (d, *J* = 9.2 Hz), 123.9, 116.1, 82.5, 40.2 (d, *J* = 11.7 Hz), 38.6 (d, *J* = 2.6 Hz), 37.7 (d, *J* = 2.6 Hz), 35.7 (d, *J* = 13.6 Hz), 20.4 (d, *J* = 36.3 Hz), 15.9 (d, *J* = 2.2 Hz) ppm; **<sup>31</sup>P{<sup>1</sup>H} NMR** (162 MHz, C<sub>6</sub>D<sub>6</sub>): δ -2.2 ppm; **IR** (ATR): ν<sub>max</sub> = 3057, 3031, 2921, 2860, 2278, 1621, 1591, 1494, 1467, 1453, 1329, 1265, 1194, 1147, 1084, 1044, 1017, 811, 744, 701, 499 cm<sup>-1</sup>; **HRMS** (Multimode): calculated for [C<sub>39</sub>H<sub>35</sub>OP + H]<sup>+</sup>: 551.2498, found: 551.2496; [α]<sub>D</sub><sup>20</sup>: 86.4 (c = 1.0, CHCl<sub>3</sub>).

**(2*S*,5*S*)-1-((*R*)-2'-(*tert*-butyldimethylsilyl)oxy-[1,1'-binaphthalen]-2-yl)-2,5-dimethylphospholane:**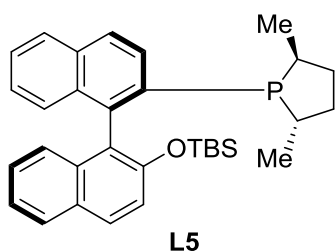

To a solution of (2*S*,5*S*)-1-((*R*)-2'-hydroxy-[1,1'-binaphthalen]-2-yl)-2,5-dimethylphospholane 1-oxide (**S3**) (100 mg, 0.250 mmol, 1.0 eq) and imidazole (34.0 mg, 0.500 mmol, 2.0 eq) in DMF (1.0 mL, 0.25 M) was added *tert*-butyldimethylsilyl chloride (57 µL, 0.375 mmol, 1.5 eq). The reaction was stirred for 10 h at 50 °C. The resulting



mixture was cooled down, diluted with EtOAc (10 mL) and washed with water (5\*8 mL). The combined organic fractions were dried over MgSO<sub>4</sub> and concentrated under reduced pressure to yield crude (2*S*,5*S*)-1-((*R*)-2'-(*tert*-butyldimethylsilyl)oxy-[1,1'-binaphthalen]-2-yl)-2,5-dimethylphospholane 1-oxide (127 mg, 0.249  $\mu$ mol, 99%) which was used in the next step without further purification.

A 10–20 mL microwave vial was transferred to a glovebox and charged with a solution of (2*S*,5*S*)-1-((*R*)-2'-(*tert*-butyldimethylsilyl)oxy-[1,1'-binaphthalen]-2-yl)-2,5-dimethylphospholane 1-oxide (145 mg, 0.282 mmol, 1.0 eq) in toluene (5.6 mL, 0.05 M). The tube was sealed and taken out of the glovebox. To this solution was added Et<sub>3</sub>N (1.3 mL, 9.01 mmol, 32 eq), and the resulting mixture was cooled down to 0 °C. Trichlorosilane (Cl<sub>3</sub>SiH) (0.23  $\mu$ L, 2.25 mmol, 8.0 eq) was added at this temperature, the tube was sealed, heated to 100 °C and the reaction was stirred for 10 h at this temperature. After this time the mixture was cooled down, diluted with Et<sub>2</sub>O (10 mL), quenched with saturated NaHCO<sub>3</sub> (2 mL) and filtered through celite (eluting with Et<sub>2</sub>O). The resulting filtrate was concentrated under reduced pressure and subjected to silica gel chromatography (pentane:EtOAc, 10:1) to afford (2*S*,5*S*)-1-((*R*)-2'-(*tert*-butyldimethylsilyl)oxy-[1,1'-binaphthalen]-2-yl)-2,5-dimethylphospholane (**L5**) (91.0 mg, 0.182 mmol, 65%).

**Appearance:** colorless oil; **R<sub>f</sub>**: 0.6 (pentane:EtOAc, 20:1); **<sup>1</sup>H NMR** (400 MHz, C<sub>6</sub>D<sub>6</sub>):  $\delta$  7.78–7.68 (m, 5 H), 7.37–7.32 (m, 1 H), 7.27–7.17 (m, 4 H), 7.10–7.04 (m, 1 H), 7.00–6.94 (m, 1 H), 2.54–2.42 (m, 1 H), 2.22–2.08 (m, 1 H), 2.05–1.94 (m, 1 H), 1.92–1.82 (m, 1 H), 1.76–1.64 (m, 1 H), 1.24 (dd,  $J$  = 7.3, 9.4 Hz, 3 H), 1.08–1.00 (m, 1 H), 0.99–0.92 (m, 3 H), 0.58 (s, 9 H), 0.12 (s, 3 H), -0.34 (s, 3 H) ppm; **<sup>13</sup>C{<sup>1</sup>H} NMR** (101 MHz, C<sub>6</sub>D<sub>6</sub>):  $\delta$  151.6 (d,  $J$  = 2.2 Hz), 144.6, 144.2, 137.7, 137.4, 136.0 (d,  $J$  = 2.9 Hz), 134.2, 133.8 (d,  $J$  = 7.0 Hz), 131.5 (d,  $J$  = 3.3 Hz), 129.7, 129.3, 128.2, 127.9, 127.1, 126.6, 126.52, 126.48, 126.3, 123.9, 120.9, 39.9 (d,  $J$  = 12.1 Hz), 38.4 (d,  $J$  = 2.6 Hz), 37.7 (d,  $J$  = 2.6 Hz), 35.6 (d,  $J$  = 13.9 Hz), 25.6 (3 C), 20.5 (d,  $J$  = 36.7 Hz), 18.1, 16.4 (d,  $J$  = 1.8 Hz), -3.5, -4.6 ppm; **<sup>31</sup>P{<sup>1</sup>H} NMR** (162 MHz, C<sub>6</sub>D<sub>6</sub>):  $\delta$  -1.8 ppm; **IR** (ATR):  $\nu_{\text{max}}$  = 3056, 2951, 2927, 2857, 1592, 1468, 1346, 1245, 996, 837, 812, 779, 745, 683 cm<sup>-1</sup>; **HRMS** (Multimode): calculated for [C<sub>32</sub>H<sub>39</sub>OPSi + H]<sup>+</sup>: 499.2581, found: 499.2588; [ $\alpha$ ]<sub>D</sub><sup>20</sup>: 106.2 (c = 1.0, CHCl<sub>3</sub>).

**(2*S*,5*S*)-1-((*R*)-2'-(*tert*-butyldiphenylsilyl)oxy-[1,1'-binaphthalen]-2-yl)-2,5-dimethylphospholane:**

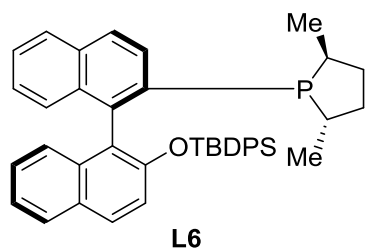

To a solution of (2*S*,5*S*)-1-((*R*)-2'-hydroxy-[1,1'-binaphthalen]-2-yl)-2,5-dimethylphospholane 1-oxide (**S3**) (190 mg, 0.474 mmol, 1.0 eq) and imidazole (129 mg, 1.50 mmol, 4 eq) in DMF (1.9 mL, 0.25 M) was added *tert*-butyldiphenylchlorosilane (0.27 mL, 1.04 mmol, 2.2 eq). The reaction was stirred for 10 h at 80 °C. The resulting mixture was cooled down, diluted with EtOAc (30 mL) and washed with water (5\*20 mL), dried over MgSO<sub>4</sub> and concentrated under reduced pressure to yield crude (2*S*,5*S*)-1-((*R*)-2'-(*tert*-butyldiphenylsilyl)oxy-[1,1'-binaphthalen]-2-yl)-2,5-dimethylphospholane 1-oxide (286 mg, 0.459  $\mu$ mol, 97%) which was used in the next step without further purification.

A 10–20 mL microwave vial was transferred to a glovebox and charged with a solution of (2*S*,5*S*)-1-((*R*)-2'-(*tert*-butyldiphenylsilyl)oxy-[1,1'-binaphthalen]-2-yl)-2,5-dimethylphospholane 1-oxide (400 mg, 0.626 mmol, 1.0 eq) in toluene (7.8 mL, 0.08 M). The tube was sealed and taken out of the glovebox. To this solution was added Et<sub>3</sub>N (2.8 mL, 20.0 mmol, 32 eq), and the resulting mixture was cooled down to 0 °C. Trichlorosilane (Cl<sub>3</sub>SiH) (0.51 mL, 5.01 mmol, 8.0 eq) was added at this temperature, the tube was sealed, heated to 100 °C and the reaction was

stirred for 10 h at this temperature. After this time the mixture was cooled down, diluted with Et<sub>2</sub>O (10 mL), quenched with saturated NaHCO<sub>3</sub> (5.0 mL) and filtered through celite (eluting with Et<sub>2</sub>O). The resulting filtrate was concentrated under reduced pressure and subjected to silica gel chromatography (pentane:EtOAc, 10:1) to afford (2*S*,5*S*)-1-((*R*)-2'-(*tert*-butyldiphenylsilyl)oxy-[1,1'-binaphthalen]-2-yl)-2,5-dimethylphospholane (**L6**) (376 mg, 0.604 mmol, 96%).

**Appearance:** white solid; **R<sub>f</sub>**: 0.55 (pentane:EtOAc, 20:1); **m.p.**: 139.7–140.8; **<sup>1</sup>H NMR** (400 MHz, C<sub>6</sub>D<sub>6</sub>): δ 7.88–7.75 (m, 7 H), 7.62 (d, *J* = 8.2 Hz, 1 H), 7.51–7.47 (m, 1 H), 7.33–7.17 (m, 9 H), 7.13–7.01 (m, 4 H), 2.51–2.41 (m, 1 H), 2.32–2.14 (m, 1 H), 2.09–1.97 (m, 1 H), 1.94–1.85 (m, 1 H), 1.82–1.70 (m, 1 H), 1.13 (dd, *J* = 7.2, 9.5 Hz, 3 H), 1.10–1.02 (m, 1 H), 0.93 (dd, *J* = 7.2, 17.9 Hz, 3 H), 0.61 (s, 9 H) ppm; **<sup>13</sup>C{<sup>1</sup>H} NMR** (100 MHz, C<sub>6</sub>D<sub>6</sub>): δ 150.9 (d, *J* = 2.2 Hz), 144.6 (d, *J* = 34.1 Hz), 137.8 (d, *J* = 30.4 Hz), 136.1 (d, *J* = 3.3 Hz), 135.93 (2 C), 135.91 (2 C), 135.85 (4 C), 134.2, 133.9 (d, *J* = 7.3 Hz), 133.6, 133.4, 131.63, 131.59, 130.3, 130.1, 129.5, 129.0, 128.2, 127.9, 127.1, 126.8, 126.49, 126.46, 126.4, 125.7 (d, *J* = 9.2 Hz), 123.8, 120.8, 41.0 (d, *J* = 12.5 Hz), 38.7 (d, *J* = 2.9 Hz), 38.0, 36.0 (d, *J* = 13.9 Hz), 26.4 (3 C), 20.6 (d, *J* = 35.6 Hz), 19.3, 16.2 (d, *J* = 1.8 Hz) ppm; **<sup>31</sup>P{<sup>1</sup>H} NMR** (162 MHz, C<sub>6</sub>D<sub>6</sub>): δ -3.4 ppm; **IR** (ATR): ν<sub>max</sub> = 3053, 2927, 2858, 1592, 1469, 1428, 1346, 1273, 1247, 1113, 998, 812, 701, 500 cm<sup>-1</sup>; **HRMS** (Multimode): calculated for [C<sub>42</sub>H<sub>43</sub>OPSi + H]<sup>+</sup>: 623.2894, found: 623.2895; [α]<sub>D</sub><sup>20</sup>: 28.1 (c = 1.0, CHCl<sub>3</sub>).

**(2*S*,5*S*)-1-((*S*)-2'-isopropoxy-[1,1'-binaphthalen]-2-yl)-2,5-dimethylphospholane:**

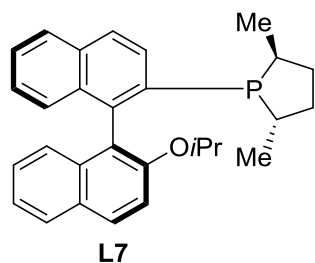

A mixture of (2*S*,5*S*)-1-((*S*)-2'-hydroxy-[1,1'-binaphthalen]-2-yl)-2,5-dimethylphospholane 1-oxide (**S4**) (120 mg, 0.300 mmol, 1.0 eq), K<sub>2</sub>CO<sub>3</sub> (166 mg, 1.20 mmol, 4.0 eq) and *i*PrI (204 mg, 1.20 mmol, 4.0 eq) in acetone (1.5 mL, 0.2 M) was stirred for 10 h at 50 °C. The reaction mixture was cooled down, filtered through celite (eluting with Et<sub>2</sub>O) and concentrated under reduced pressure to give (2*S*,5*S*)-1-((*S*)-2'-isopropoxy-[1,1'-binaphthalen]-2-yl)-2,5-dimethylphospholane (119 mg, 0.279 mmol, 93%), which was used in the next step without

further purification.

A 10-20 mL microwave vial was transferred to a glovebox and charged with a solution of (2*S*,5*S*)-1-((*S*)-2'-isopropoxy-[1,1'-binaphthalen]-2-yl)-2,5-dimethylphospholane (115 mg, 0.270 mmol, 1.0 eq) in toluene (5.4 mL, 0.05 M). The tube was sealed and taken out of the glovebox. To this solution was added Et<sub>3</sub>N (1.2 mL, 8.64 mmol, 32 eq), and the resulting mixture was cooled down to 0 °C. Trichlorosilane (Cl<sub>3</sub>SiH) (0.22 mL, 2.16 mmol, 8.0 eq) was added at this temperature, the tube was sealed, heated to 100 °C and the reaction was stirred for 10 h at this temperature. After this time the mixture was cooled down, diluted with Et<sub>2</sub>O (6.0 mL), quenched with saturated NaHCO<sub>3</sub> (3.0 mL) and filtered through celite (eluting with Et<sub>2</sub>O). The resulting filtrate was concentrated under reduced pressure and subjected to silica gel chromatography (pentane:EtOAc, 20:1) to afford (2*S*,5*S*)-1-((*S*)-2'-isopropoxy-[1,1'-binaphthalen]-2-yl)-2,5-dimethylphospholane (**L7**) (65.0 mg, 0.158 mmol, 59%).

**Appearance:** colorless oil; **R<sub>f</sub>**: 0.6 (pentane:EtOAc, 10:1); **<sup>1</sup>H NMR** (400 MHz, CDCl<sub>3</sub>): δ 8.00–7.76 (m, 5 H), 7.49–7.35 (m, 2 H), 7.31–7.24 (m, 1 H), 7.23–7.09 (m, 3 H), 6.98–6.92 (m, 1 H), 4.43 (dt, *J* = 6.0, 12.0 Hz, 1 H), 2.80–2.55 (m, 1 H), 2.32–2.11 (m, 1 H), 2.10–1.89 (m, 2 H), 1.89–1.68 (m, 1 H), 1.35–1.24 (m, 1 H), 1.24 (dd, *J* = 7.0, 18.2 Hz, 3 H), 1.11 (d, *J* = 6.1 Hz, 3 H), 0.93–0.72 (m, 6H) ppm; **<sup>13</sup>C{<sup>1</sup>H} NMR** (101 MHz, C<sub>6</sub>D<sub>6</sub>): δ 153.5 (d, *J* = 2.2 Hz), 144.3 (d, *J* = 34.8 Hz), 137.4 (d, *J* = 29.3 Hz), 135.5 (d, *J* = 2.2 Hz), 134.2, 133.8 (d, *J* = 7.3 Hz), 131.21,

131.17, 129.6, 129.4, 127.1, 126.6, 126.5, 126.3, 128.2, 127.9, 126.2, 125.7 (d,  $J = 9.2$  Hz), 123.8, 117.1, 71.0, 39.3 (d,  $J = 12.1$  Hz), 38.2 (d,  $J = 2.2$  Hz), 37.6 (d,  $J = 2.6$  Hz), 35.4 (d,  $J = 14.3$  Hz), 22.7, 22.3, 21.0 (d,  $J = 37.0$  Hz), 16.2 (d,  $J = 1.8$  Hz) ppm;  $^{31}\text{P}\{^1\text{H}\}$  NMR (162 MHz,  $\text{CDCl}_3$ ):  $\delta$  -2.2 ppm; IR (ATR):  $\nu_{\text{max}} = 2920, 2861, 2279, 1619, 1591, 1506, 1452, 1329, 1257, 1241, 1113, 1001, 811, 747, 491$   $\text{cm}^{-1}$ ; HRMS (Multimode): calculated for  $[\text{C}_{29}\text{H}_{31}\text{OP} + \text{H}]^+$ : 427.2185, found: 427.2184;  $[\alpha]_{\text{D}}^{20}$ : 61.8 ( $c = 1.0$ ,  $\text{CHCl}_3$ ).

**(2*S*,5*S*)-1-((*S*)-2'-(*tert*-butyldiphenylsilyl)oxy-[1,1'-binaphthalen]-2-yl)-2,5-dimethylphospholane:**

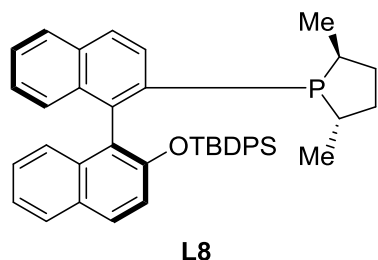

To a solution of (2*S*,5*S*)-1-((*S*)-2'-hydroxy-[1,1'-binaphthalen]-2-yl)-2,5-dimethylphospholane 1-oxide (**S4**) (120 mg, 0.300 mmol, 1.0 eq) and imidazole (82.0 mg, 1.20 mmol, 4 eq) in DMF (1.2 mL, 0.25 M) was added *tert*-butyldiphenylchlorosilane (0.17 mL, 0.660 mmol, 2.2 eq). The reaction was stirred for 10 h at 80 °C. The resulting mixture was cooled down, diluted with EtOAc (15 mL) and washed with water (5\*10 mL), dried over  $\text{MgSO}_4$  and concentrated under reduced pressure to yield crude (2*S*,5*S*)-1-

((*S*)-2'-(*tert*-butyldiphenylsilyl)oxy-[1,1'-binaphthalen]-2-yl)-2,5-dimethylphospholane 1-oxide (236 mg, 0.369  $\mu\text{mol}$ , 74%).

A 2–5 mL microwave vial was transferred to a glovebox and charged with a solution of (2*S*,5*S*)-1-((*S*)-2'-(*tert*-butyldiphenylsilyl)oxy-[1,1'-binaphthalen]-2-yl)-2,5-dimethylphospholane 1-oxide (66.0 mg, 0.100 mmol, 1.0 eq) in toluene (0.74 mL, 0.14 M). The tube was sealed and taken out of the glovebox. To this solution was added  $\text{Et}_3\text{N}$  (0.46 mL, 3.20 mmol, 32 eq), and the resulting mixture was cooled to 0 °C. Trichlorosilane ( $\text{Cl}_3\text{SiH}$ ) (83  $\mu\text{L}$ , 0.800 mmol, 8.0 eq) was added at this temperature, the tube was sealed, heated to 100 °C and the reaction was stirred for 10 h at this temperature. After this time the mixture was cooled down, diluted with  $\text{Et}_2\text{O}$  (2.0 mL), quenched with saturated  $\text{NaHCO}_3$  (1.0 mL) and filtered through celite (eluting with  $\text{Et}_2\text{O}$ ). The resulting filtrate was concentrated under reduced pressure and subjected to silica gel chromatography (pentane:EtOAc, 50:1) to afford (2*S*,5*S*)-1-((*S*)-2'-(*tert*-butyldiphenylsilyl)oxy-[1,1'-binaphthalen]-2-yl)-2,5-dimethylphospholane (**L8**) (55.0 mg, 0.051 mmol, 85%).

**Appearance:** white foam; **R<sub>f</sub>**: 0.55 (pentane:EtOAc, 20:1);  $^1\text{H}$  NMR (400 MHz,  $\text{C}_6\text{D}_6$ ):  $\delta$  7.96–7.90 (m, 2 H), 7.86–7.82 (m, 1 H), 7.80–7.73 (m, 4 H), 7.55–7.46 (m, 2 H), 7.32–7.22 (m, 6 H), 7.18–7.15 (m, 3 H), 7.11–6.98 (m, 4 H), 2.75–2.60 (m, 1H), 2.16 – 2.04 (m, 1 H), 1.91–1.70 (m, 2 H), 1.70–1.55 (m, 1 H), 1.26 (dd,  $J = 7.2, 18.6$  Hz, 3 H), 1.26–1.16 (m, 1 H), 0.89–0.82 (m, 3 H), 0.58 (s, 9 H);  $^{13}\text{C}\{^1\text{H}\}$  NMR (101 MHz,  $\text{C}_6\text{D}_6$ ):  $\delta$  150.4 (d,  $J = 2.2$  Hz), 144.3 (d,  $J = 33.7$  Hz), 137.0 (d,  $J = 29.0$  Hz), 136.17, 136.15, 135.9 (4 C), 135.5 (d,  $J = 2.6$  Hz), 134.3, 133.9 (d,  $J = 7.0$  Hz), 133.6, 133.1, 130.8 (d,  $J = 3.3$  Hz), 130.2 (4 C), 129.5, 129.0, 128.2, 127.9, 127.6, 127.2, 126.7 (d,  $J = 4.0$  Hz), 126.4, 126.1, 125.7, 125.6, 123.7, 121.0, 37.5, 37.1, 35.8 (d,  $J = 14.7$  Hz), 30.5, 26.0 (3 C), 21.9 (d,  $J = 37.0$  Hz), 19.3, 16.7 ppm;  $^{31}\text{P}\{^1\text{H}\}$  NMR (162 MHz,  $\text{C}_6\text{D}_6$ ):  $\delta$  -0.3 ppm; IR (ATR):  $\nu_{\text{max}} = 3051, 2925, 2857, 1621, 1504, 1469, 1346, 1275, 1248, 1113, 1002, 825, 811, 745, 701, 612, 502$   $\text{cm}^{-1}$ ; HRMS (Multimode): calculated for  $[\text{C}_{42}\text{H}_{43}\text{OPSi} + \text{H}]^+$ : 623.2894, found: 623.2902;  $[\alpha]_{\text{D}}^{20}$ : 72.3 ( $c = 0.9$ ,  $\text{CHCl}_3$ ).

## Synthesis of Starting Materials

### Typical Procedures for the Preparation of Substituted Benzhydryl Glutarimides S5a-S5r

#### Typical Procedure TP1

A mixture of glutarimide (1.0 eq.), TBAI (20 mol%),  $K_2CO_3$  (2 eq.) and corresponding benzhydryl bromide (1.5 eq.) in dry acetone (0.5 M) was stirred at room temperature for 36 hours under inert atmosphere. The resulting mixture was concentrated under reduced pressure, suspended in water, extracted with EtOAc (\*2), washed with water and brine. After drying over  $MgSO_4$  the mixture was concentrated under reduced pressure. Desired product was purified by flash chromatography.

#### Typical Procedure TP2

To a mixture of corresponding diarylmethanol (1.0 eq), glutarimide (1.4 eq.),  $PPh_3$  (1.33 eq) in dry THF (0.5 M) was added DIAD (1.3 eq) dropwise at 0 °C. The resulting mixture was stirred at room temperature for 12 hours under inert atmosphere. After that it was concentrated under reduced pressure, and the desired product was purified by flash chromatography.

### Characterisation data for benzhydryl glutarimides S5a-S5r

#### 1-Benzhydrylpiperidine-2,6-dione:

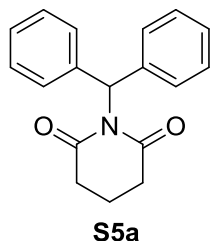

Was obtained according to **TP1** from glutarimide (3.00 g, 26.5 mmol), TBAI (1.96 g, 5.30 mmol),  $K_2CO_3$  (7.33 g, 53.0 mmol) and bromomethylenedibenzene (9.83 g, 39.8 mmol). **Yield:** 4.69 g, 63%; **appearance:** pale brown solid; **R<sub>f</sub>:** 0.2 (pentane:EtOAc, 4:1); **m.p.:** 124.3–124.8 °C; **<sup>1</sup>H NMR** (400 MHz,  $CDCl_3$ ):  $\delta$  7.36–7.20 (m, 10 H), 7.18 (s, 1 H), 2.70 (t,  $J$  = 6.6 Hz, 4 H), 2.04–1.94 (m, 2 H) ppm; **<sup>13</sup>C{<sup>1</sup>H} NMR** (101 MHz,  $CDCl_3$ ):  $\delta$  172.5 (2 C), 138.8 (2 C), 128.8 (4 C), 128.2 (4 C), 127.3 (2 C), 58.3, 33.8 (2 C), 17.2 ppm; **IR** (ATR):  $\nu_{max}$  = 3060, 3028, 2942, 1727, 1677, 1345, 1240, 1169, 1135, 1000, 876, 813, 773, 700  $cm^{-1}$ ; **HRMS** (ESI): calculated for  $[C_{18}H_{17}NO_2 + Na]^+$ : 302.1151, found: 302.1157.

#### 1-(Di-*p*-tolylmethyl)piperidine-2,6-dione:

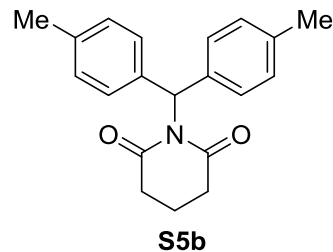

Was obtained according to **TP1** from glutarimide (104 mg, 0.921 mmol), TBAI (68.0 mg, 0.184 mmol),  $K_2CO_3$  (254 mg, 1.84 mmol) and 4,4'-(bromomethylene)bis(methylbenzene) (380 mg, 1.38 mmol). **Yield:** 64.0 mg, 23%; **appearance:** white solid; **R<sub>f</sub>:** 0.2 (pentane:EtOAc, 4:1); **m.p.:** 125.0–126.5 °C; **<sup>1</sup>H NMR** (400 MHz,  $CDCl_3$ ):  $\delta$  7.18 (d,  $J$  = 8.0 Hz, 4 H), 7.13–7.09 (m, 4 H + 1 H), 2.69 (t,  $J$  = 6.6 Hz, 4 H), 2.33 (s, 6 H), 2.01–1.93 (m, 2 H) ppm; **<sup>13</sup>C{<sup>1</sup>H} NMR** (101 MHz,  $CDCl_3$ ):  $\delta$  172.5 (2 C), 136.8 (2 C), 136.0 (2 C), 128.9 (4 C), 128.7 (4 C), 57.9, 33.9 (2 C), 21.2 (2 C), 17.2 ppm; **IR** (ATR):  $\nu_{max}$  = 2943, 1674, 1513, 1342, 1317, 1239, 1167, 1134, 1000, 883, 761  $cm^{-1}$ ; **HRMS** (ESI): calculated for  $[C_{20}H_{21}NO_2 + Na]^+$ : 330.1465, found: 330.1470.

**1-(Di([1,1'-biphenyl]-4-yl)methyl)piperidine-2,6-dione:**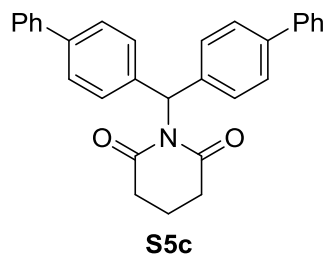

Was obtained according to **TP2** from di([1,1'-biphenyl]-4-yl)methanol (1.35 g, 4.00 mmol), glutarimide (633 mg, 5.60 mmol), PPh<sub>3</sub> (1.40 g, 5.32 mmol) and DIAD (1.05 mL, 5.20 mmol). **Yield:** 301 mg, 17%; **appearance:** white foam; **R<sub>f</sub>:** 0.1 (pentane:EtOAc, 4:1); **<sup>1</sup>H NMR** (400 MHz, CDCl<sub>3</sub>): δ 7.63–7.53 (m, 8 H), 7.47–7.38 (m, 8 H), 7.37–7.31 (m, 2 H), 7.27 (s, 1 H), 2.75 (t, *J* = 6.5 Hz, 4 H), 2.07–1.99 (m, 2 H) ppm; **<sup>13</sup>C{<sup>1</sup>H}** (101 MHz, CDCl<sub>3</sub>): δ 172.5 (2 C), 140.9 (2 C), 140.2 (2 C), 137.8 (2 C), 129.3 (4 C), 128.9 (4 C), 127.4 (2 C), 127.2 (4 C), 127.0 (4 C), 57.8, 33.9 (2 C), 17.3 ppm; **IR** (ATR):  $\nu_{\max}$  = 3028, 2963, 1673, 1519, 1341, 1317, 1238, 1168, 1134, 1000, 766, 740, 698, 565 cm<sup>-1</sup>; **HRMS** (ESI): calculated for [C<sub>30</sub>H<sub>25</sub>NO<sub>2</sub> + Na]<sup>+</sup>: 454.1778, found: 454.1783.

**1-(Bis(4-fluorophenyl)methyl)piperidine-2,6-dione:**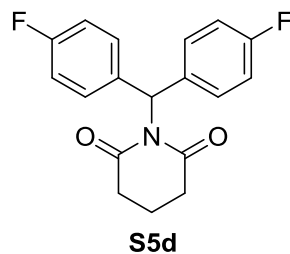

Was obtained according to **TP1** from glutarimide (146 mg, 1.30 mmol), TBAI (96.0 mg, 259 μmol), K<sub>2</sub>CO<sub>3</sub> (358 mg, 2.59 mmol) and 4,4'-(bromomethylene)bis(fluorobenzene) (550 mg, 1.94 mmol). **Yield:** 198 mg, 49%; **appearance:** white solid; **R<sub>f</sub>:** 0.15 (pentane:EtOAc, 4:1); **m.p.:** 133.6–134.6 °C; **<sup>1</sup>H NMR** (400 MHz, CDCl<sub>3</sub>): δ 7.31–7.20 (m, 4 H), 7.11 (s, 1 H), 7.05–6.94 (m, 4 H), 2.70 (t, *J* = 6.6 Hz, 4H), 2.03–1.95 (m, 2 H) ppm; **<sup>13</sup>C{<sup>1</sup>H}** NMR (101 MHz, CDCl<sub>3</sub>): δ 172.5 (2 C), 162.1 (d, *J* = 246.5 Hz, 2 C), 134.4 (d, *J* = 3.2 Hz, 2 C), 130.4 (d, *J* = 8.1 Hz, 4 C), 115.2 (d, *J* = 21.3 Hz, 4 C), 57.1, 33.8 (2 C), 17.1 ppm; **<sup>19</sup>F{<sup>1</sup>H}** NMR (376 MHz, CDCl<sub>3</sub>): δ -115.2 ppm; **IR** (ATR):  $\nu_{\max}$  = 2973, 2898, 1727, 1676, 1603, 1508, 1378, 1342, 1318, 1224, 1167, 1134, 1098, 1000 cm<sup>-1</sup>; **HRMS** (APPI): calculated for [C<sub>18</sub>H<sub>15</sub>F<sub>2</sub>NO<sub>2</sub>]<sup>+</sup>: 315.1065, found: 315.1057.

**1-(Bis(4-chlorophenyl)methyl)piperidine-2,6-dione:**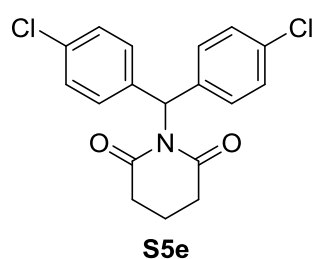

Was obtained according to **TP1** from glutarimide (597 mg, 5.27 mmol), TBAI (390 mg, 1.06 mmol), K<sub>2</sub>CO<sub>3</sub> (1.46 g, 10.6 mmol) and 4,4'-(bromomethylene)bis(chlorobenzene) (2.50 g, 7.91 mmol). **Yield:** 1.45 g, 79%; **appearance:** colorless solid; **R<sub>f</sub>:** 0.2 (pentane:EtOAc, 4:1); **m.p.:** 130.7–131.3 °C; **<sup>1</sup>H NMR** (400 MHz, CDCl<sub>3</sub>): δ 7.30–7.23 (m, 4 H), 7.22–7.16 (m, 4 H), 7.08 (s, 1 H), 2.69 (t, *J* = 6.6 Hz, 4 H), 2.04–1.91 (m, 2 H) ppm; **<sup>13</sup>C{<sup>1</sup>H}** NMR (101 MHz, CDCl<sub>3</sub>): δ 172.4 (2 C), 136.8 (2 C), 133.4 (2 C), 130.1 (4 C), 128.6 (4 C), 57.1, 33.7 (2 C), 17.1 ppm; **IR** (ATR):  $\nu_{\max}$  = 2967, 2884, 1728, 1679, 1491, 1376, 1342, 1318, 1238, 1168, 1168, 1134, 1091, 1001 cm<sup>-1</sup>; **HRMS** (APPI): calculated for [C<sub>18</sub>H<sub>15</sub><sup>35</sup>Cl<sub>2</sub>NO<sub>2</sub>]<sup>+</sup>: 347.0474, found: 347.0464.

**1-(Bis(4-(trifluoromethyl)phenyl)methyl)piperidine-2,6-dione:**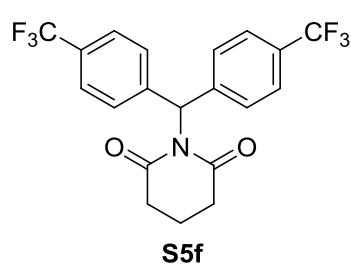

Was obtained according to **TP1** from glutarimide (528 mg, 4.67 mmol), TBAI (345 mg, 0.933 mmol), K<sub>2</sub>CO<sub>3</sub> (1.29 g, 9.33 mmol) and 4,4'-(bromomethylene)bis((trifluoromethyl)benzene) (2.68 g, 7.00 mmol). **Yield:** 205 mg, 11%; **appearance:** yellow solid; **R<sub>f</sub>:** 0.3

(pentane:EtOAc, 4:1); **m.p.**: 134.3–136.2 °C;  $^1\text{H}$  NMR (400 MHz,  $\text{CDCl}_3$ ):  $\delta$  7.58 (d,  $J$  = 8.4 Hz, 4 H), 7.42–7.34 (m, 4 H), 7.24 (s, 1 H), 2.74 (t,  $J$  = 6.5 Hz, 4 H), 2.07–1.93 (m, 2 H) ppm;  $^{13}\text{C}\{^1\text{H}\}$  NMR (101 MHz,  $\text{CDCl}_3$ ):  $\delta$  172.4 (2 C), 141.9 (2 C), 129.9 (q,  $J$  = 32.5 Hz, 2 C), 129.1 (4 C), 125.5 (q,  $J$  = 3.7 Hz, 4 C), 122.8 (2 C), 57.3, 33.7 (2 C), 17.1 ppm;  $^{19}\text{F}\{^1\text{H}\}$  NMR (376 MHz,  $\text{CDCl}_3$ ):  $\delta$  -62.7 ppm; **IR** (ATR):  $\nu_{\text{max}}$  = 2941, 1732, 1681, 1619, 1414, 1377, 1321, 1240, 1165, 1111, 1068, 1018, 1001  $\text{cm}^{-1}$ ; **HRMS** (APPI): calculated for  $[\text{C}_{20}\text{H}_{15}\text{F}_6\text{NO}_2]^+$ : 415.1001, found: 415.0989.

### 1-(Bis(4-methoxyphenyl)methyl)piperidine-2,6-dione:

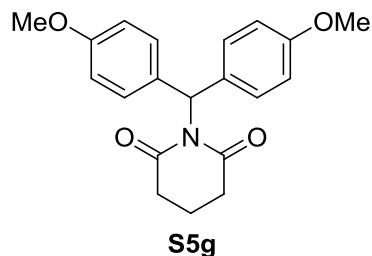

Was obtained according to **TP2** from bis(4-methoxyphenyl)methanol (1.22 g, 5.00 mmol), glutarimide (792 mg, 7.00 mmol),  $\text{PPh}_3$  (1.74 g, 6.65 mmol) and DIAD (1.3 mL, 6.50 mmol). **Yield**: 305 mg, 45%; **appearance**: white foam; **R<sub>f</sub>**: 0.25 (pentane:EtOAc, 1:1);  $^1\text{H}$  NMR (400 MHz,  $\text{CDCl}_3$ ):  $\delta$  7.25–7.19 (m, 4 H), 7.07 (s, 1 H), 6.88–6.72 (m, 4 H), 3.79 (s, 6 H), 2.68 (t,  $J$  = 6.6 Hz, 4 H), 2.01–1.93 (m, 2 H) ppm;  $^{13}\text{C}\{^1\text{H}\}$  NMR (101 MHz,  $\text{CDCl}_3$ ):  $\delta$  172.5 (2 C), 158.7 (2 C), 131.2 (2 C), 130.0 (4 C), 113.6 (4 C), 57.5, 55.4 (2 C), 33.9 (2 C), 17.3 ppm; **IR** (ATR):  $\nu_{\text{max}}$  = 2958, 2937, 2902, 2837, 1725, 1675, 1609, 1511, 1344, 1319, 1248, 1176, 1136, 1111, 834  $\text{cm}^{-1}$ ; **HRMS** (ESI): calculated for  $[\text{C}_{20}\text{H}_{21}\text{NO}_4 + \text{Na}]^+$ : 362.1363, found: 362.1365.

### 1-(Bis(3-(trifluoromethyl)phenyl)methyl)piperidine-2,6-dione:

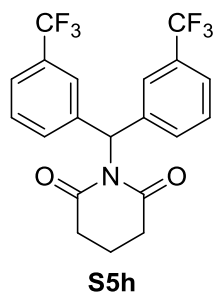

Was obtained according to **TP1** from glutarimide (472 mg, 4.18 mmol), TBAI (309 mg, 835  $\mu\text{mol}$ ),  $\text{K}_2\text{CO}_3$  (1.15 g, 8.35 mmol) and 3,3'-(bromomethylene)bis((trifluoromethyl)benzene) (2.40 g, 6.26 mmol). **Yield**: 1.30 g, 75%; **appearance**: colorless oil; **R<sub>f</sub>**: 0.3 (pentane:EtOAc, 4:1);  $^1\text{H}$  NMR (400 MHz,  $\text{CDCl}_3$ ):  $\delta$  7.64–7.42 (m, 8 H), 7.25 (s, 1 H), 2.74 (t,  $J$  = 6.6 Hz, 4 H), 2.02 (p,  $J$  = 6.5 Hz, 2 H) ppm;  $^{13}\text{C}\{^1\text{H}\}$  NMR (101 MHz,  $\text{CDCl}_3$ ):  $\delta$  172.4 (2 C), 139.0 (2 C), 132.2 (2 C), 130.9 (q,  $J$  = 32.3 Hz, 2 C), 129.0 (2 C), 125.4 (q,  $J$  = 3.7 Hz, 2 C), 124.7 (q,  $J$  = 3.8 Hz, 2 C), 122.8 (2 C), 57.3, 33.7 (2 C), 17.1 ppm;  $^{19}\text{F}\{^1\text{H}\}$  NMR (376 MHz,  $\text{CDCl}_3$ ):  $\delta$  -62.6 ppm; **IR** (ATR):  $\nu_{\text{max}}$  = 2945, 1732, 1683, 1377, 1329, 1257, 1241, 1166, 1122, 1076, 1003, 927, 904  $\text{cm}^{-1}$ ; **HRMS** (ESI): calculated for  $[\text{C}_{20}\text{H}_{15}\text{F}_6\text{NO}_2 + \text{Na}]^+$ : 438.0899, found: 438.0895.

### 1-(Di(naphthalen-2-yl)methyl)piperidine-2,6-dione:

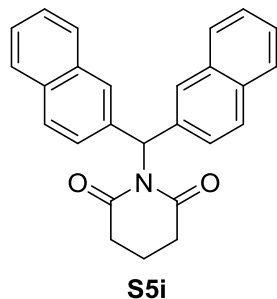

Was obtained according to **TP1** from glutarimide (754 mg, 6.67 mmol), TBAI (492 mg, 1.33 mmol),  $\text{K}_2\text{CO}_3$  (1.84 g, 13.3 mmol) and 2,2'-(bromomethylene)dinaphthalene (3.47 g, 10.0 mmol). **Yield**: 815 mg, 32%; **appearance**: pale brown solid; **R<sub>f</sub>**: 0.1 (pentane:EtOAc, 4:1); **m.p.**: 147.3–148.2 °C;  $^1\text{H}$  NMR (400 MHz,  $\text{CDCl}_3$ ):  $\delta$  7.92–7.67 (m, 8 H), 7.62–7.39 (m, 7 H), 2.75 (t,  $J$  = 6.5 Hz, 4 H), 2.07–1.99 (m, 2 H) ppm;  $^{13}\text{C}\{^1\text{H}\}$  NMR (101 MHz,  $\text{CDCl}_3$ ):  $\delta$  172.6 (2 C), 136.3 (2 C), 133.3 (2 C), 132.8 (2 C), 128.2, 127.9 (4 C), 127.7 (2 C), 126.9 (2 C), 126.2 (2 C), 126.1 (2 C), 58.7, 33.9 (2 C), 17.3 ppm; **IR** (ATR):  $\nu_{\text{max}}$  = 3054, 2937, 1727, 1676, 1633, 1599, 1507, 1428, 1338, 1317, 1239, 1169, 1132, 1001, 820  $\text{cm}^{-1}$ ; **HRMS** (ESI): calculated for  $[\text{C}_{26}\text{H}_{21}\text{NO}_2 + \text{Na}]^+$ : 402.1465, found: 402.1470.

**1-(Di(thiophen-2-yl)methyl)piperidine-2,6-dione:**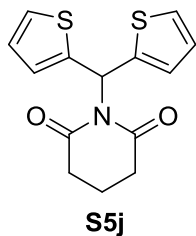

Was obtained according to **TP2** from di(thiophen-2-yl)methanol (720 mg, 3.67 mmol), glutarimide (581 mg, 5.14 mmol), PPh<sub>3</sub> (1.28 g, 4.88 mmol) and DIAD (0.93 mL, 4.77 mmol). **Yield:** 95.0 mg, 9%; **appearance:** white solid; **R<sub>f</sub>:** 0.2 (pentane:EtOAc, 4:1); **m.p.:** 153.2 – 155.7 °C; **<sup>1</sup>H NMR** (400 MHz, C<sub>6</sub>D<sub>6</sub>): δ 7.96 (s, 1 H), 7.13–7.11 (m, 2 H), 6.86–6.83 (m, 2 H), 6.68–6.64 (m, 2 H), 1.81 (t, *J* = 6.6 Hz, 4 H), 0.80–0.72 (m, 2 H) ppm; **<sup>13</sup>C{<sup>1</sup>H} NMR** (151 MHz, C<sub>6</sub>D<sub>6</sub>): δ 171.2 (2 C), 142.6 (2 C), 128.4 (2 C), 126.4 (2 C), 126.1 (2 C), 50.4, 33.0 (2 C), 16.4 ppm; **IR** (ATR):  $\nu_{\max}$  = 3098, 2943, 2882, 1725, 1675, 1430, 1387, 1337, 1316, 1239, 1169, 1133, 1045, 997, 851 cm<sup>-1</sup>; **HRMS** (ESI): calculated for [C<sub>14</sub>H<sub>13</sub>NO<sub>2</sub>S<sub>2</sub> + Na]<sup>+</sup>: 314.0280, found: 314.0282.

**1-(Di-*o*-tolylmethyl)piperidine-2,6-dione:**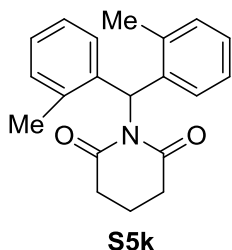

Was obtained according to **TP1** from glutarimide (377 mg, 3.33 mmol), TBAI (246 mg, 667 μmol), K<sub>2</sub>CO<sub>3</sub> (921 mg, 6.67 mmol) and 2,2'-(bromomethylene)bis(methylbenzene) (1.38 g, 5.00 mmol). **Yield:** 284 mg, 28%; **appearance:** white solid; **R<sub>f</sub>:** 0.2 (pentane:EtOAc, 4:1); **m.p.:** 134.5–137.1 °C; **<sup>1</sup>H NMR** (400 MHz, CDCl<sub>3</sub>): δ 7.22–7.03 (m, 9 H), 2.70 (t, *J* = 6.5 Hz, 4 H), 2.15 (s, 6 H), 2.02–1.93 (m, 2 H) ppm; **<sup>13</sup>C{<sup>1</sup>H} NMR** (101 MHz, CDCl<sub>3</sub>): δ 172.5 (2 C), 136.9 (2 C), 136.0 (2 C), 130.4 (2 C), 129.3 (2 C), 127.5 (2 C), 125.8 (2 C), 55.4, 33.8 (2 C), 19.5 (2 C), 17.5 ppm; **IR** (ATR):  $\nu_{\max}$  = 3021, 2956, 2878, 1727, 1677, 1488, 1460, 1377, 1342, 1317, 1240, 1169, 1137, 1111, 1000 cm<sup>-1</sup>; **HRMS** (ESI): calculated for [C<sub>20</sub>H<sub>21</sub>NO<sub>2</sub> + Na]<sup>+</sup>: 330.1465, found: 330.1470.

**1-Benzhydryl-4,4-dimethylpiperidine-2,6-dione:**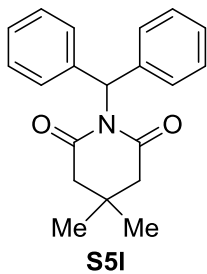

Was obtained according to **TP1** from 4,4-dimethylglutarimide (706 mg, 5.00 mmol), TBAI (369 mg, 1.00 mmol), K<sub>2</sub>CO<sub>3</sub> (1.38 g, 10.0 mmol) and benzhydryl bromide (1.85 g, 7.50 mmol). **Yield:** 548 mg, 36%; **appearance:** white solid; **R<sub>f</sub>:** 0.45 (pentane:EtOAc, 4:1); **m.p.:** 134.1–135.3 °C; **<sup>1</sup>H NMR** (400 MHz, CDCl<sub>3</sub>): δ 7.31–7.20 (m, 10 H), 7.17 (s, 1 H), 2.53 (s, 4 H), 1.06 (s, 6 H) ppm; **<sup>13</sup>C{<sup>1</sup>H} NMR** (101 MHz, CDCl<sub>3</sub>): δ 172.0 (2 C), 138.8 (2 C), 128.8 (4 C), 128.2 (4 C), 127.3 (2 C), 58.3, 47.2 (2 C), 29.3, 27.9 (2 C) ppm; **IR** (ATR):  $\nu_{\max}$  = 3029, 2957, 2872, 1727, 1674, 1494, 1450, 1382, 1349, 1269, 1229, 1136, 1080 cm<sup>-1</sup>; **HRMS** (ESI): calculated for [C<sub>20</sub>H<sub>21</sub>NO<sub>2</sub> + Na]<sup>+</sup>: 330.1465, found: 330.1470.

**8-Benzhydryl-8-azaspiro[4.5]decane-7,9-dione:**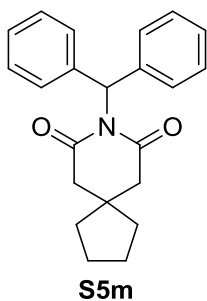

Was obtained according to **TP1** from 8-azaspiro[4.5]decane-7,9-dione (418 mg, 2.50 mmol), TBAI (185 mg, 0.50 mmol), K<sub>2</sub>CO<sub>3</sub> (691 mg, 5.00 mmol) and (bromomethylene)dibenzene (927 mg, 3.75 mmol). **Yield:** 450 mg, 54%; **appearance:** white powder; **R<sub>f</sub>:** 0.4 (pentane:EtOAc, 4:1); **m.p.:** 157.1–160.5 °C; **<sup>1</sup>H NMR** (400 MHz, CDCl<sub>3</sub>): δ 7.32–7.21 (m, 10 H), 7.18 (s, 1 H), 2.64 (s, 4 H), 1.76–1.64 (m, 4 H), 1.59–1.45 (m, 4 H) ppm; **<sup>13</sup>C{<sup>1</sup>H} NMR** (101 MHz,

CDCl<sub>3</sub>):  $\delta$  172.2 (2 C), 138.9 (2 C), 128.8 (4 C), 128.2 (4 C), 127.3 (2 C), 58.4, 45.8 (2 C), 39.6, 37.8 (2 C), 24.5 (2 C) ppm; **IR** (ATR):  $\nu_{\max}$  = 3088, 3061, 3028, 2950, 2863, 1728, 1674, 1601, 1494, 1450, 1382, 1351, 1335, 1265, 1143, 1079, 751, 720, 697, 578, 522 cm<sup>-1</sup>; **HRMS** (ESI): calculated for [C<sub>22</sub>H<sub>23</sub>NO<sub>2</sub> + Na]<sup>+</sup>: 356.1621, found: 356.1627.

### 1-((4-fluorophenyl)(phenyl)methyl)piperidine-2,6-dione:

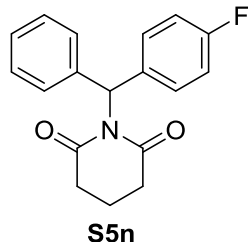

Was obtained according to **TP2** from (4-fluorophenyl)(phenyl)methanol (1.70 g, 8.41 mmol), glutarimide (1.33 g, 11.8 mmol), PPh<sub>3</sub> (2.93 g, 11.2 mmol) and DIAD (2.13 mL, 10.9 mmol). **Yield**: 421 mg, 17%; **appearance**: white solid; **R<sub>f</sub>**: 0.2 (pentane:EtOAc, 4:1); **m.p.**: 105.1–108.2 °C; **<sup>1</sup>H NMR** (400 MHz, CDCl<sub>3</sub>):  $\delta$  7.41–7.17 (m, 7 H), 7.15 (s, 1 H), 7.02–6.96 (m, 2 H), 2.70 (t, *J* = 6.6 Hz, 4 H), 2.07–1.86 (m, 2 H) ppm; **<sup>13</sup>C{<sup>1</sup>H} NMR** (101 MHz, CDCl<sub>3</sub>):  $\delta$  172.5 (2 C), 162.1 (d, *J* = 246.1 Hz), 138.5, 134.6 (d, *J* = 3.3 Hz), 130.9 (d, *J* = 8.1 Hz, 2 C), 128.33 (2 C), 128.27 (2 C), 127.3, 115.1 (d, *J* = 21.3 Hz, 2 C), 57.6, 33.8 (2 C), 17.2 ppm; **<sup>19</sup>F{<sup>1</sup>H} NMR** (376 MHz, CDCl<sub>3</sub>):  $\delta$  -115 ppm; **IR** (ATR):  $\nu_{\max}$  = 3062, 2963, 2944, 2885, 1727, 1675, 1603, 1509, 1452, 1379, 1343, 1318, 1239, 1168, 1134, 1099, 1067, 1000, 881, 841, 792, 728, 701, 563 cm<sup>-1</sup>; **HRMS** (ESI): calculated for [C<sub>18</sub>H<sub>16</sub>FNO<sub>2</sub> + Na]<sup>+</sup>: 320.1057, found: 320.1063.

### 1-(Phenyl(4-(trifluoromethyl)phenyl)methyl)piperidine-2,6-dione:

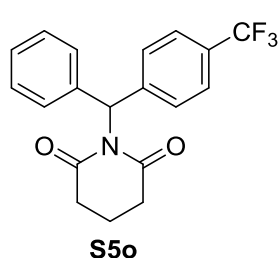

Was obtained according to **TP2** from phenyl(4-(trifluoromethyl)phenyl)methanol (1.17 g, 4.64 mmol), glutarimide (735 mg, 6.49 mmol), PPh<sub>3</sub> (1.62 g, 6.17 mmol) and DIAD (1.17 mL, 6.03 mmol). **Yield**: 322 mg, 20%; **appearance**: colorless foam; **R<sub>f</sub>**: 0.15 (pentane:EtOAc, 4:1); **<sup>1</sup>H NMR** (400 MHz, CDCl<sub>3</sub>):  $\delta$  7.56 (d, *J* = 8.2 Hz, 2 H), 7.41–7.26 (m, 7 H), 7.20 (s, 1 H), 2.72 (t, *J* = 6.6 Hz, 4 H), 2.00 (p, *J* = 6.6 Hz, 2 H) ppm; **<sup>13</sup>C{<sup>1</sup>H} NMR** (101 MHz, CDCl<sub>3</sub>):  $\delta$  172.4 (2 C), 143.0, 137.8, 128.9 (4 C), 128.5 (2 C), 127.8, 125.2 (q, *J* = 3.4 Hz, 2 C), 57.8, 33.8 (2 C), 17.2 ppm, the signals of CF<sub>3</sub> and the adjacent carbon are missing; **<sup>19</sup>F{<sup>1</sup>H} NMR** (376 MHz, CDCl<sub>3</sub>):  $\delta$  -62.5 ppm; **IR** (ATR):  $\nu_{\max}$  = 3304, 3032, 2982, 2939, 1707, 1619, 1495, 1467, 1454, 1385, 1324, 1248, 1165, 1108, 1067, 1018, 951, 922, 840, 814, 760, 722, 699, 620 cm<sup>-1</sup>; **HRMS** (ESI): calculated for [C<sub>19</sub>H<sub>16</sub>F<sub>3</sub>NO<sub>2</sub> + Na]<sup>+</sup>: 370.1025, found: 370.1031.

### 1-((4-Methoxyphenyl)(phenyl)methyl)piperidine-2,6-dione:

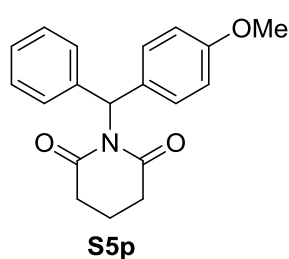

Was obtained according to **TP2** from (4-methoxyphenyl)(phenyl)methanol (1.07 g, 5.00 mmol), glutarimide (792 mg, 7.00 mmol), PPh<sub>3</sub> (1.74 g, 6.65 mmol) and DIAD (1.26 mL, 6.50 mmol). **Yield**: 241 mg, 16%; **appearance**: white solid; **R<sub>f</sub>**: 0.45 (pentane:EtOAc, 1:1); **m.p.**: 131.0–132.2 °C; **<sup>1</sup>H NMR** (400 MHz, CDCl<sub>3</sub>):  $\delta$  7.33–7.17 (m, 7 H), 7.12 (s, 1 H), 6.88–6.75 (m, 2 H), 3.78 (s, 3 H), 2.67 (t, *J* = 6.5 Hz, 4 H), 1.99–1.91 (m, 2 H) ppm; **<sup>13</sup>C{<sup>1</sup>H} NMR** (101 MHz, CDCl<sub>3</sub>):  $\delta$  172.4 (2 C), 158.8, 139.0, 130.9, 130.7 (2 C), 128.2 (2 C), 128.1 (2 C), 127.0, 113.5 (2 C), 57.8, 55.3, 33.8 (2 C), 17.2 ppm; **IR** (ATR):  $\nu_{\max}$  = 2966, 2901, 2836, 1727, 1676, 1608, 1584, 1512, 1461, 1381, 1344, 1318, 1248, 1170, 1135, 1112, 1066, 1032, 1000, 930, 880, 837, 780, 732, 703, 564 cm<sup>-1</sup>; **HRMS** (ESI): calculated for [C<sub>19</sub>H<sub>19</sub>NO<sub>3</sub> + Na]<sup>+</sup>: 332.1257, found: 332.1261.



**1-(Phenyl(*p*-tolyl)methyl)piperidine-2,6-dione:**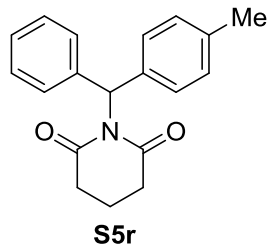

Was obtained according to **TP2** from phenyl(*p*-tolyl)methanol (1.59 g, 8.00 mmol), glutarimide (1.27 g, 11.2 mmol), PPh<sub>3</sub> (2.79 g, 10.6 mmol) and DIAD (2.02 mL, 10.4 mmol). **Yield:** 326 mg, 14%; **appearance:** colorless oil; **R<sub>f</sub>:** 0.6 (pentane:EtOAc, 1:1); **<sup>1</sup>H NMR** (400 MHz, CDCl<sub>3</sub>): δ 7.38–7.24 (m, 7 H), 7.21–7.14 (m, 3 H), 2.72 (t, *J* = 6.6 Hz, 4 H), 2.38 (s, 3 H), 2.05–1.95 (m, 2 H) ppm; **<sup>13</sup>C{<sup>1</sup>H} NMR** (101 MHz, CDCl<sub>3</sub>): δ 172.4 (2 C), 138.9, 136.9, 135.7, 128.9 (2 C), 128.8 (2 C), 128.5 (2 C), 128.1 (2 C), 127.1, 58.0, 33.7 (2 C), 21.2, 17.1 ppm; **IR** (ATR): ν<sub>max</sub> = 3027, 2943, 1727, 1676, 1514, 1379, 1344, 1318, 1240, 1168, 1134, 1000, 929, 880, 828, 746, 725, 702, 593, 564, 510, 442 cm<sup>-1</sup>; **HRMS** (ESI): calculated for [C<sub>19</sub>H<sub>19</sub>NO<sub>2</sub> + Na]<sup>+</sup>: 316.1308, found: 316.1312.

**Typical Procedure for the Preparation of Substituted Ketene Amino Phosphates 4a–4r (TP3)**

A cold (-78 °C) solution of KHMDS (1.1 eq) in THF (0.5 M) was treated with a solution of the corresponding benzhydryl imide (1.0 eq) in THF (0.5 M) dropwise. The resulting mixture was stirred at this temperature for 1.5 h and then a solution of ClPO(OPh)<sub>2</sub> (1.2 eq) in THF (1 M) was added by a syringe pump over 30 min at -78 °C. The reaction mixture was stirred at -78 °C for 15 min and then allowed to warm to room temperature over 1.5 h. It was then quenched by the addition of 2% aqueous ammonia, diluted with water and the layers were separated. The aqueous layer was extracted with Et<sub>2</sub>O (\*2), combined organic fractions were washed with water, brine, dried over K<sub>2</sub>CO<sub>3</sub> and concentrated under reduced pressure. Crude product was purified by flash chromatography (pentane:Et<sub>2</sub>O) using phosphate buffered silica gel. The purified samples were stored in a glovebox freezer as 0.5 M solutions in distilled toluene, otherwise they hydrolyzed to the corresponding imides.

The obtained phosphates were sufficiently characterized by <sup>1</sup>H NMR, <sup>31</sup>P NMR, IR spectroscopy and mass spectrometry, the representative <sup>13</sup>C{<sup>1</sup>H} NMR spectra for compounds **4a**, **4a'**, **4c** and **4n** are also included.

**Characterisation data for ketene amino phosphates 4a–4r****1-Benzhydryl-6-oxo-1,4,5,6-tetrahydropyridin-2-yl diphenyl phosphate:**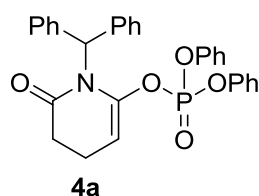

Was obtained according to **TP3** from KHMDS (329 mg, 1.65 mmol), 1-benzhydrylpiperidine-2,6-dione (**S5a**) (419 mg, 1.50 mmol) and ClPO(OPh)<sub>2</sub> (484 mg, 1.80 mmol). **Yield:** 609 mg, 79%; **Appearance:** colorless oil; **R<sub>f</sub>:** 0.4 (pentane:Et<sub>2</sub>O, 1:2); **<sup>1</sup>H NMR** (400 MHz, C<sub>6</sub>D<sub>6</sub>): δ 7.48–7.38 (m, 4 H), 7.32 (s, 1 H), 7.15–7.09 (m, 4 H), 7.08–6.98 (m, 6 H), 6.91–6.85 (m, 4 H), 6.82–6.73 (m, 2 H), 5.39 (td, *J* = 2.0, 5.2 Hz, 1 H), 2.18 (dd, *J* = 6.6, 8.3 Hz, 2 H), 1.66–1.56 (m, 2 H) ppm; **<sup>13</sup>C{<sup>1</sup>H} NMR** (151 MHz, C<sub>6</sub>D<sub>6</sub>): δ 170.1, 150.9, 150.8, 143.42, 143.40, 139.8, 130.0, 129.1, 128.4, 127.3, 125.69, 125.67, 120.4, 120.3, 91.03, 91.00, 59.4, 32.7, 17.3 ppm; **<sup>31</sup>P{<sup>1</sup>H} NMR** (162 MHz, C<sub>6</sub>D<sub>6</sub>): δ -19.1 ppm; **IR** (ATR):  $\nu_{\max}$  = 3061, 3029, 2906, 2847, 1689, 1674, 1589, 1488, 1454, 1396, 1344, 1299, 1274, 11172, 1162, 1010, 966, 949, 769, 688, 516 cm<sup>-1</sup>; **HRMS** (Multimode): calculated for [C<sub>30</sub>H<sub>26</sub>NO<sub>5</sub>P + H]<sup>+</sup>: 512.1621, found: 512.1617.

**1-Benzhydryl-6-oxo-1,4,5,6-tetrahydropyridin-2-yl diethyl phosphate:**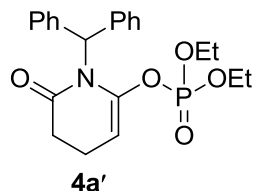

Was obtained according to **TP3** from KHMDS (219 mg, 1.10 mmol), 1-benzhydrylpiperidine-2,6-dione (**S5a**) (279 mg, 1.00 mmol) and ClPO(OEt)<sub>2</sub> (207 mg, 1.20 mmol). **Yield:** 299 mg, 72%; **Appearance:** colorless oil; **R<sub>f</sub>:** 0.35 (pentane:Et<sub>2</sub>O, 1:2); **<sup>1</sup>H NMR** (400 MHz, C<sub>6</sub>D<sub>6</sub>): δ 7.51–7.44 (m, 5 H), 7.13 (d, *J* = 7.8 Hz, 4 H), 7.07–6.99 (m, 2 H), 5.33 (td, *J* = 1.9, 5.1 Hz, 1 H), 3.72–3.42 (m, 4 H), 2.26 (dd, *J* = 6.6, 8.3 Hz, 2 H), 1.69 (tdd, *J* = 1.1, 5.1, 7.3 Hz, 2 H), 0.82 (td, *J* = 1.0, 7.0 Hz, 6 H) ppm; **<sup>13</sup>C{<sup>1</sup>H} NMR** (151 MHz, C<sub>6</sub>D<sub>6</sub>): δ 170.3, 143.64, 143.63, 140.2, 129.1, 128.4, 127.2, 89.28, 89.27, 64.34, 64.31, 58.9, 32.8, 17.3, 15.94, 15.89 ppm; **<sup>31</sup>P{<sup>1</sup>H} NMR** (162 MHz, C<sub>6</sub>D<sub>6</sub>): δ -8.0 ppm; **IR** (ATR):  $\nu_{\max}$  = 3061, 3029, 2982, 2930, 2910, 2848, 1686, 1672, 1495, 1448, 1394, 1345, 1272, 1180, 1163, 1025, 1004, 898, 845, 746, 695, 508 cm<sup>-1</sup>; **HRMS** (Multimode): calculated for [C<sub>22</sub>H<sub>26</sub>NO<sub>5</sub>P + H]<sup>+</sup>: 416.1621, found: 416.1625.

**1-(Di-*p*-tolylmethyl)-6-oxo-1,4,5,6-tetrahydropyridin-2-yl diphenyl phosphate:**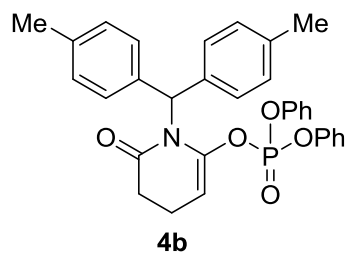

Was obtained according to **TP3** from KHMDS (105 mg, 0.526 mmol), 1-(di-*p*-tolylmethyl)piperidine-2,6-dione (**S5b**) (147 mg, 0.478 mmol) and ClPO(OPh)<sub>2</sub> (154 mg, 0.574 mmol). **Yield:** 162 mg, 63%; **appearance:** yellow oil; **R<sub>f</sub>:** 0.45 (pentane:Et<sub>2</sub>O, 1:2); **<sup>1</sup>H NMR** (400 MHz, C<sub>6</sub>D<sub>6</sub>): δ 7.44–7.38 (m, 5 H), 7.06–7.02 (m, 4 H), 6.97 (d, *J* = 7.9 Hz, 4 H), 6.91–6.85 (m, 4 H), 6.81–6.71 (m, 2 H), 5.41 (td, *J* = 1.9, 5.1 Hz, 1 H), 2.25–2.15 (m, 2 H), 2.09 (s, 6 H), 1.65–1.58 (m, 2 H) ppm; **<sup>31</sup>P{<sup>1</sup>H} NMR** (162 MHz, C<sub>6</sub>D<sub>6</sub>): δ -19.1 ppm; **IR** (ATR): ν<sub>max</sub> = 3085, 3059, 3025, 2919, 2864, 1690, 1674, 1591, 1492, 1456, 1393, 1344, 1299, 1185, 1128, 1025, 1009, 965, 949, 903, 840, 815, 755, 727, 692, 515, 463 cm<sup>-1</sup>; **HRMS** (Multimode): calculated for [C<sub>32</sub>H<sub>30</sub>NO<sub>5</sub>P + H]<sup>+</sup>: 540.1934, found: 540.1928.

**1-(Di([1,1'-biphenyl]-4-yl)methyl)-6-oxo-1,4,5,6-tetrahydropyridin-2-yl diphenyl phosphate:**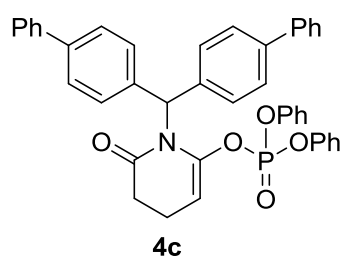

Was obtained according to **TP3** from KHMDS (64.0 mg, 0.321 mmol), 1-(di([1,1'-biphenyl]-4-yl)methyl)piperidine-2,6-dione (**S5c**) (126 mg, 0.292 mmol) and ClPO(OPh)<sub>2</sub> (94.0 mg, 0.350 mmol). **Yield:** 64.0 mg, 33%; **appearance:** colorless oil; **R<sub>f</sub>:** 0.3 (pentane:Et<sub>2</sub>O, 1:2); **<sup>1</sup>H NMR** (600 MHz, C<sub>6</sub>D<sub>6</sub>): δ 7.57 (d, *J* = 8.4 Hz, 4 H), 7.52–7.45 (m, 9 H), 7.24–7.20 (m, 4 H), 7.15–7.12 (m, 2 H), 7.05–7.01 (m, 4 H), 6.85–6.80 (m, 4 H), 6.71–6.69 (m, 2 H), 5.45 (td, *J* = 1.9, 5.2 Hz, 1 H), 2.26 (dd, *J* = 6.5, 8.3 Hz, 2 H), 1.76–1.59 (m, 2 H) ppm; **<sup>13</sup>C{<sup>1</sup>H} NMR** (101 MHz, C<sub>6</sub>D<sub>6</sub>): δ 170.2, 150.8, 150.7, 143.4, 141.2, 140.4, 138.8, 130.0, 129.7, 129.1, 128.2, 128.0, 127.5, 127.4, 127.3, 125.7, 120.3, 120.3, 91.0, 58.8, 32.7, 17.3 ppm; **<sup>31</sup>P{<sup>1</sup>H} NMR** (162 MHz, C<sub>6</sub>D<sub>6</sub>): δ -19.2 ppm; **IR** (ATR): ν<sub>max</sub> = 3057, 3028, 2952, 2921, 2851, 1688, 1673, 1590, 1486, 1391, 1344, 1312, 1296, 1271, 1160, 1129, 1072, 1025, 1009, 946, 905, 846, 742, 731, 687, 561, 513, 465 cm<sup>-1</sup>.

**1-(Bis(4-fluorophenyl)methyl)-6-oxo-1,4,5,6-tetrahydropyridin-2-yl diphenyl phosphate:**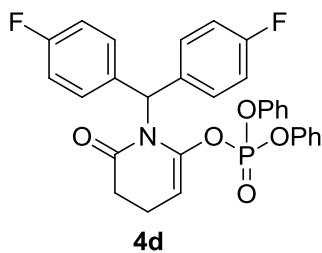

Was obtained according to **TP3** from KHMDS (110 mg, 0.550 mmol), 1-(bis(4-fluorophenyl)methyl)piperidine-2,6-dione (**S5d**) (158 mg, 0.500 mmol) and ClPO(OPh)<sub>2</sub> (161 mg, 0.600 mmol). **Yield:** 126 mg, 46%; **appearance:** colorless oil; **R<sub>f</sub>:** 0.55 (pentane:Et<sub>2</sub>O, 1:2); **<sup>1</sup>H NMR** (400 MHz, C<sub>6</sub>D<sub>6</sub>): 7.15–7.12 (m, 2 H), 7.08 (s, 1 H), 7.03–6.98 (m, 4 H), 6.90–6.84 (m, 4 H), 6.79–6.72 (m, 6 H), 5.37 (td, *J* = 2.0, 5.1 Hz, 1 H), 2.16 (dd, *J* = 6.6, 8.3 Hz, 1 H), 1.63–1.55 (m, 2 H) ppm; **<sup>19</sup>F{<sup>1</sup>H} NMR** (376 MHz, C<sub>6</sub>D<sub>6</sub>): δ -115.3 ppm; **<sup>31</sup>P{<sup>1</sup>H} NMR** (162 MHz, C<sub>6</sub>D<sub>6</sub>): δ -19.2 ppm; **IR** (ATR): ν<sub>max</sub> = 3070, 2904, 2849, 1688, 1675, 1601, 1589, 1508, 1487, 1391, 1298, 1273, 1225, 1159, 1127, 1099, 1010, 965, 949, 905, 833, 754, 687, 543, 516 cm<sup>-1</sup>; **HRMS** (Multimode): calculated for [C<sub>30</sub>H<sub>24</sub>F<sub>2</sub>NO<sub>5</sub>P + H]<sup>+</sup>: 548.1433, found: 548.1441.

**1-(Bis(4-chlorophenyl)methyl)-6-oxo-1,4,5,6-tetrahydropyridin-2-yl diphenyl phosphate:**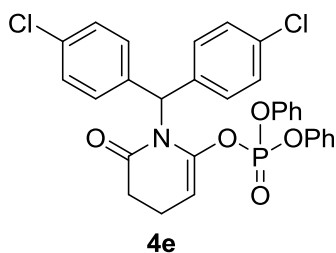

Was obtained according to **TP3** from KHMDS (329 mg, 1.65 mmol), 1-(bis(4-chlorophenyl)methyl)piperidine-2,6-dione (**S5e**) (522 mg, 1.50 mmol) and ClPO(OPh)<sub>2</sub> (484 mg, 1.80 mmol). **Yield**: 576 mg, 66%; **appearance**: colorless oil; **R<sub>f</sub>**: 0.5 (pentane:Et<sub>2</sub>O, 1:2); **<sup>1</sup>H NMR** (400 MHz, C<sub>6</sub>D<sub>6</sub>): 7.07–7.04 (m, 8 H), 7.02 (s, 1 H), 7.01–6.97 (m, 4 H), 6.92–6.87 (m, 4 H), 6.81–6.75 (m, 2 H), 5.36 (dt, *J* = 3.6, 7.2 Hz, 1 H), 2.20–2.06 (m, 2 H), 1.61–1.54 (m, 2 H) ppm; **<sup>31</sup>P{<sup>1</sup>H} NMR** (162 MHz, C<sub>6</sub>D<sub>6</sub>): δ -19.3 ppm; **IR** (ATR): ν<sub>max</sub> = 3464, 3088, 3061, 3028, 2950, 2863 1728, 1674, 1601, 1494, 1450, 1382, 1351, 1335, 1265, 1230, 1143, 1079, 1032, 919, 876, 795, 750, 720, 697, 629, 599, 578, 545, 522, 468, 452 cm<sup>-1</sup>; **HRMS** (Multimode): calculated for [C<sub>30</sub>H<sub>24</sub><sup>35</sup>Cl<sub>2</sub>NO<sub>5</sub>P + H]<sup>+</sup>: 580.0842, found: 580.0849.

**1-(Bis(4-(trifluoromethyl)phenyl)methyl)-6-oxo-1,4,5,6-tetrahydropyridin-2-yl diphenyl phosphate:**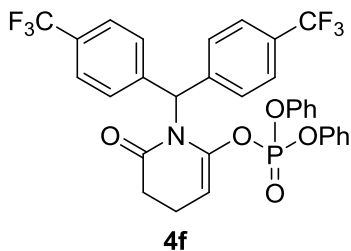

Was obtained according to **TP3** from KHMDS (110 mg, 0.550 mmol), 1-(bis(4-(trifluoromethyl)phenyl)methyl)piperidine-2,6-dione (**S5f**) (208 mg, 0.500 mmol) and ClPO(OPh)<sub>2</sub> (161 mg, 0.600 mmol), as a 5:1 mixture with starting material. **Yield** (calculated based on product:starting material ratio): 65.0 mg, 17%; **appearance**: yellow oil; **R<sub>f</sub>**: 0.6 (pentane:Et<sub>2</sub>O, 1:2); **<sup>1</sup>H NMR** (600 MHz, C<sub>6</sub>D<sub>6</sub>): 7.31 (d, *J* = 8.3 Hz, 4 H), 7.20–7.13 (m, 4 H), 7.05 (s, 1 H), 6.97–6.93 (m, 4 H), 6.90–6.82 (m, 4 H), 6.81–6.68 (m, 2 H), 5.35 (td, *J* = 2.0, 5.1 Hz, 1 H), 2.21–2.08 (m, 2 H), 1.67–1.53 (m, 2 H) ppm; **<sup>19</sup>F{<sup>1</sup>H} NMR** (376 MHz, CDCl<sub>3</sub>): δ -62.2 ppm; **<sup>31</sup>P{<sup>1</sup>H} NMR** (162 MHz, C<sub>6</sub>D<sub>6</sub>): δ -19.2 ppm; **HRMS** (Multimode): calculated for [C<sub>32</sub>H<sub>25</sub>F<sub>6</sub>NO<sub>5</sub>P]<sup>+</sup>: 648.1369, found: 648.1361.

**1-(Bis(4-methoxyphenyl)methyl)-6-oxo-1,4,5,6-tetrahydropyridin-2-yl diphenyl phosphate:**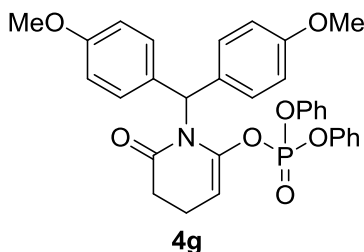

Was obtained according to **TP3** from KHMDS (110 mg, 0.550 mmol), 1-(bis(4-methoxyphenyl)methyl)piperidine-2,6-dione (**S5g**) (170 mg, 0.500 mmol) and ClPO(OPh)<sub>2</sub> (161 mg, 0.600 mmol), as a 4:1 mixture with starting material. **Yield** (calculated based on product:starting material ratio): 89.0 mg, 27%; **appearance**: colorless oil; **R<sub>f</sub>**: 0.3 (pentane:Et<sub>2</sub>O, 1:2); **<sup>1</sup>H NMR** (400 MHz, C<sub>6</sub>D<sub>6</sub>): 7.45–7.37 (m, 4 H), 7.35 (s, 1 H), 7.07–7.02 (m, 4 H), 6.94–6.85 (m, 4 H), 6.81–6.71 (m, 6 H), 5.41 (td, *J* = 1.9, 5.1 Hz, 1 H), 3.27 (s, 6 H), 2.26–2.20 (m, 2 H), 1.70–1.59 (m, 2 H) ppm; **<sup>31</sup>P{<sup>1</sup>H} NMR** (162 MHz, C<sub>6</sub>D<sub>6</sub>): δ -19.1 ppm; **IR** (ATR): ν<sub>max</sub> = 3084, 3061, 3025, 3001, 2917, 2836, 1727, 1609, 1587, 1510, 1490, 1461, 1394, 1342, 1300, 1246, 1173, 1130, 1111, 1028, 1009, 948, 830, 769, 728, 688, 560, 515, 464 cm<sup>-1</sup>; **HRMS** (Multimode): calculated for [C<sub>32</sub>H<sub>30</sub>NO<sub>7</sub>P + Na]<sup>+</sup>: 594.1652, found: 594.1656.

**1-(Bis(3-(trifluoromethyl)phenyl)methyl)-6-oxo-1,4,5,6-tetrahydropyridin-2-yl diphenyl phosphate:**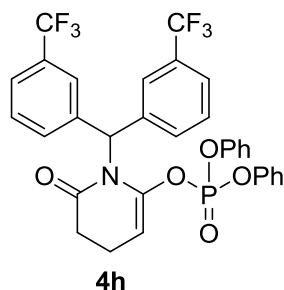

Was obtained according to **TP3** from KHMDS (110 mg, 0.550 mmol), 1-(bis(4-fluorophenyl)methyl)piperidine-2,6-dione (**S5h**) (208 mg, 0.500 mmol) and ClPO(OPh)<sub>2</sub> (161 mg, 0.600 mmol). **Yield:** 99.0 mg, 30%; **appearance:** yellow oil; **R<sub>f</sub>:** 0.55 (pentane:Et<sub>2</sub>O, 1:2); **<sup>1</sup>H NMR** (400 MHz, C<sub>6</sub>D<sub>6</sub>): 7.78 (s, 2 H), 7.33 (d, *J* = 7.9 Hz, 2 H), 7.27–7.18 (m, 2 H), 7.03–7.00 (m, 4 H), 6.98 (s, 1 H), 6.92–6.81 (m, 6 H), 6.79–6.70 (m, 2 H), 5.30 (td, *J* = 2.0, 5.1 Hz, 1 H), 2.03 (dd, *J* = 6.7, 8.3 Hz, 2 H), 1.54–1.44 (m, 2 H) ppm; **<sup>19</sup>F{<sup>1</sup>H} NMR** (376 MHz, C<sub>6</sub>D<sub>6</sub>): δ -62.2 ppm; **<sup>31</sup>P{<sup>1</sup>H} NMR** (162 MHz, C<sub>6</sub>D<sub>6</sub>): δ -18.7 ppm; **IR** (ATR): ν<sub>max</sub> = 3067, 2922, 2852, 1695, 1678, 1591, 1489, 1446, 1393, 1329, 1270, 1163, 1124, 1099, 1076, 1011, 969, 950, 904, 858, 768, 701, 664, 653, 616, 595, 558, 517 cm<sup>-1</sup>; **HRMS** (Multimode): calculated for [C<sub>32</sub>H<sub>24</sub>F<sub>6</sub>NO<sub>5</sub>P + H]<sup>+</sup>: 548.1433, found: 548.1441.

**1-(Di(naphthalen-2-yl)methyl)-6-oxo-1,4,5,6-tetrahydropyridin-2-yl diphenyl phosphate:**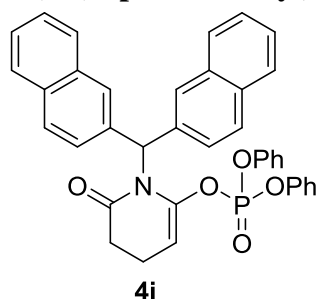

Was obtained according to **TP3** from KHMDS (110 mg, 0.550 mmol), 1-(di(naphthalen-2-yl)methyl)piperidine-2,6-dione (**S4i**) (190 mg, 0.500 mmol) and ClPO(OPh)<sub>2</sub> (161 mg, 0.600 mmol). **Yield:** 248 mg, 81%; **appearance:** white foam; **R<sub>f</sub>:** 0.4 (pentane:Et<sub>2</sub>O, 1:2); **<sup>1</sup>H NMR** (400 MHz, C<sub>6</sub>D<sub>6</sub>): 8.11–7.99 (m, 2 H), 7.79 (s, 1 H), 7.66–7.49 (m, 8 H), 7.31–7.16 (m, 4 H), 6.81–6.77 (m, 4 H), 6.73–6.61 (m, 6 H), 5.44 (td, *J* = 1.9, 5.1 Hz, 1 H), 2.34–2.23 (m, 2 H), 1.70–1.64 (m, 2 H) ppm; **<sup>31</sup>P{<sup>1</sup>H} NMR** (162 MHz, C<sub>6</sub>D<sub>6</sub>): δ -19.0 ppm; **IR** (ATR): ν<sub>max</sub> = 3066, 2925, 2851, 1698, 1672, 1590, 1489, 1445, 1398, 1330, 1281, 1163, 1128, 1100, 1071, 1000, 961, 950, 902, 858, 664, 653, 620, 534 cm<sup>-1</sup>; **HRMS** (Multimode): calculated for [C<sub>38</sub>H<sub>30</sub>NO<sub>5</sub>P + K]<sup>+</sup>: 650.1493, found: 650.1489.

**1-(Di(thiophen-2-yl)methyl)-6-oxo-1,4,5,6-tetrahydropyridin-2-yl diphenyl phosphate:**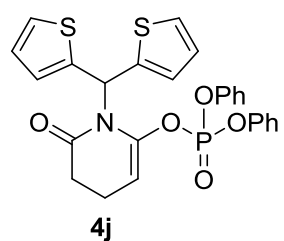

Was obtained according to **TP3** from KHMDS (45.0 mg, 0.227 mmol), 1-(di(thiophen-2-yl)methyl)piperidine-2,6-dione (**S4j**) (60.0 mg, 0.206 mmol) and ClPO(OPh)<sub>2</sub> (66.0 mg, 0.247 mmol). **Yield:** 72 mg, 67%; **appearance:** colorless oil; **R<sub>f</sub>:** 0.45 (pentane:Et<sub>2</sub>O, 1:2); **<sup>1</sup>H NMR** (400 MHz, C<sub>6</sub>D<sub>6</sub>): 7.60 (s, 1 H), 7.15–7.09 (m, 4 H), 6.93–6.88 (m, 3 H), 6.83–6.76 (m, 3 H), 6.67–6.63 (m, 2 H), 5.40 (t, *J* = 5.1 Hz, 1 H), 2.08 (t, *J* = 7.3 Hz, 2 H), 1.61–1.49 (m, 2 H) ppm; **<sup>31</sup>P{<sup>1</sup>H} NMR** (162 MHz, C<sub>6</sub>D<sub>6</sub>): δ -19.0 ppm; **IR** (ATR): ν<sub>max</sub> = 3101, 3070, 2953, 2923, 2851, 1687, 1674, 1589, 1487, 1396, 1363, 1342, 1298, 1269, 1231, 1210, 1134, 1071, 1024, 1009, 946, 904, 856, 832, 757, 687, 616, 584, 565, 515 cm<sup>-1</sup>; **HRMS** (Multimode): calculated for [C<sub>26</sub>H<sub>22</sub>NO<sub>5</sub>PS<sub>2</sub> + Na]<sup>+</sup>: 546.0569, found: 546.0574.

**1-(Di-*o*-tolylmethyl)-6-oxo-1,4,5,6-tetrahydropyridin-2-yl diphenyl phosphate:**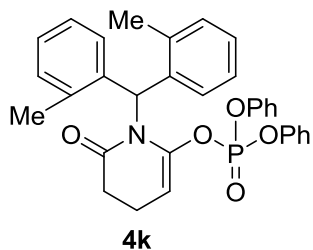

Was obtained according to **TP3** from KHMDS (110 mg, 0.550 mmol), 1-(di-*o*-tolylmethyl)piperidine-2,6-dione (**S4k**) (154 mg, 0.500 mmol) and ClPO(OPh)<sub>2</sub> (161 mg, 0.600 mmol). **Yield**: 168 mg, 62%; **appearance**: colorless oil; **R<sub>f</sub>**: 0.55 (pentane:Et<sub>2</sub>O, 1:2); **<sup>1</sup>H NMR** (400 MHz, C<sub>6</sub>D<sub>6</sub>): 7.52–7.44 (m, 2 H), 7.39 (s, 1 H), 7.09–6.96 (m, 10 H), 6.90 (t, *J* = 7.9 Hz, 4 H), 6.83–6.73 (m, 2 H), 5.41 (td, *J* = 1.8, 5.2 Hz, 1 H), 2.22–2.14 (m, 2 H), 7.17 (s, 6 H), 1.72–1.60 (m, 2 H) ppm; **<sup>31</sup>P{<sup>1</sup>H} NMR** (162 MHz, C<sub>6</sub>D<sub>6</sub>): δ -19.3 ppm; **IR** (ATR): ν<sub>max</sub> = 3068, 3023, 2950, 2924, 2850, 1687, 1590, 1488, 1458, 1403, 1379, 1343, 1312, 1291, 1276, 1173, 1134, 1010, 966, 951, 851, 742, 688, 516, 497 cm<sup>-1</sup>; **HRMS** (Multimode): calculated for [C<sub>32</sub>H<sub>30</sub>NO<sub>5</sub>P + H]<sup>+</sup>: 540.1934, found: 540.1943.

**1-Benzhydryl-4,4-dimethyl-6-oxo-1,4,5,6-tetrahydropyridin-2-yl diphenyl phosphate:**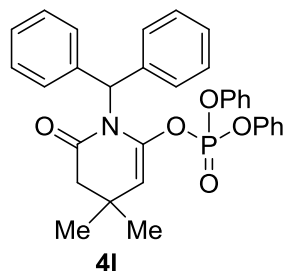

Was obtained according to **TP3** from KHMDS (197 mg, 0.550 mmol), 1-benzhydryl-4,4-dimethylpiperidine-2,6-dione (**S5l**) (277 mg, 0.900 mmol) and ClPO(OPh)<sub>2</sub> (290 mg, 1.08 mmol), as a 10:1 mixture with bisphosphate. **Yield** (calculated based on product:side-product ratio): 376 mg, 72%; **appearance**: colorless oil; **R<sub>f</sub>**: 0.55 (pentane:Et<sub>2</sub>O, 1:2); **<sup>1</sup>H NMR** (400 MHz, C<sub>6</sub>D<sub>6</sub>): 7.48–7.44 (m, 4 H), 7.15–7.00 (m, 11 H), 6.91–6.84 (m, 4 H), 6.81–6.74 (m, 2 H), 5.37 (d, *J* = 2.0 Hz, 1 H), 2.21 (s, 2 H), 0.71 (s, 6H) ppm; **<sup>31</sup>P{<sup>1</sup>H} NMR** (162 MHz, C<sub>6</sub>D<sub>6</sub>): δ -19.0 ppm; **HRMS** (Multimode): calculated for [C<sub>32</sub>H<sub>30</sub>NO<sub>5</sub>P + H]<sup>+</sup>: 540.1934, found: 540.1928.

**8-Benzhydryl-9-oxo-8-azaspiro[4.5]dec-6-en-7-yl diphenyl phosphate:**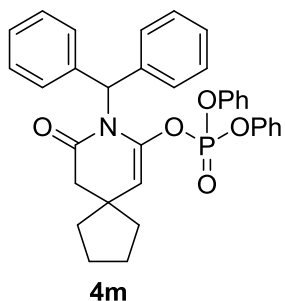

Was obtained according to **TP3** from KHMDS (219 mg, 1.10 mmol), 8-benzhydryl-8-azaspiro[4.5]decane-7,9-dione (**S5m**) (333 mg, 1.00 mmol) and ClPO(OPh)<sub>2</sub> (322 mg, 1.20 mmol), as a 12:1 mixture with bisphosphate. **Yield** (calculated based on product:side-product ratio): 410 mg, 65%; **appearance**: colorless oil; **R<sub>f</sub>**: 0.5 (pentane:Et<sub>2</sub>O, 1:1); **<sup>1</sup>H NMR** (400 MHz, C<sub>6</sub>D<sub>6</sub>): 7.49–7.44 (m, 4 H), 7.39 (s, 1 H), 7.14–7.10 (m, 4 H), 7.08–7.03 (m, 6 H), 6.92–6.86 (m, 4 H), 6.82–6.75 (m, 2 H), 5.49–5.47 (m, 1 H), 2.32 (s, 2 H), 1.31–1.18 (m, 8 H) ppm; **<sup>31</sup>P{<sup>1</sup>H} NMR** (162 MHz, C<sub>6</sub>D<sub>6</sub>): δ -18.9 ppm; **HRMS** (Multimode): calculated for [C<sub>34</sub>H<sub>32</sub>NO<sub>5</sub>P + H]<sup>+</sup>: 566.2091, found: 566.2091.

**1-((4-Fluorophenyl)(phenyl)methyl)-6-oxo-1,4,5,6-tetrahydropyridin-2-yl diphenyl phosphate:**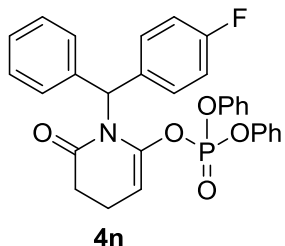

Was obtained according to **TP3** from KHMDS (110 mg, 0.550 mmol), 1-((4-fluorophenyl)(phenyl)methyl)piperidine-2,6-dione (**S5n**) (149 mg, 0.500 mmol) and ClPO(OPh)<sub>2</sub> (161 mg, 0.600 mmol). **Yield**: 178 mg, 67%; **appearance**: yellowish oil; **R<sub>f</sub>**: 0.5 (pentane:Et<sub>2</sub>O, 1:2); **<sup>1</sup>H NMR** (400 MHz, C<sub>6</sub>D<sub>6</sub>): 7.37–7.33 (m, 2 H), 7.24–7.18 (m, 3 H), 7.14–7.09 (m, 2 H), 7.07–6.97 (m, 5 H), 6.89–6.83 (m, 4 H), 6.78–6.70 (m, 4 H), 5.38 (td, *J* = 1.9, 5.1 Hz, 1 H), 2.17 (dd, *J* = 6.6, 8.3 Hz, 2 H), 1.64–1.54 (m, 2

H) ppm;  $^{13}\text{C}\{^1\text{H}\}$  NMR (151 MHz,  $\text{C}_6\text{D}_6$ )  $\delta$  170.1, 163.2, 161.5, 150.74, 150.69, 143.21, 143.19, 139.5, 135.49, 135.47, 131.0, 130.9, 130.0, 128.8, 128.5, 128.4, 127.4, 125.79, 125.77, 120.29, 120.26, 120.22, 120.19, 115.2, 115.1, 91.20, 91.18, 58.7, 32.6, 17.2 ppm;  $^{19}\text{F}\{^1\text{H}\}$  NMR (376 MHz,  $\text{C}_6\text{D}_6$ ):  $\delta$  -115.5 ppm;  $^{31}\text{P}\{^1\text{H}\}$  NMR (162 MHz,  $\text{C}_6\text{D}_6$ ):  $\delta$  -19.1 ppm; IR (ATR):  $\nu_{\text{max}}$  = 3061, 3026, 2919, 2855, 1692, 1675, 1602, 1590, 1508, 1489, 1454, 1393, 1343, 1313, 1300, 1273, 1226, 1184, 1160, 1128, 1009, 965, 947, 836, 755, 727, 687, 555, 515, 501, 463  $\text{cm}^{-1}$ ; HRMS (Multimode): calculated for  $[\text{C}_{30}\text{H}_{26}\text{FNO}_5\text{P}]^+$ : 530.1527, found: 530.1523.

**6-Oxo-1-(phenyl(4-(trifluoromethyl)phenyl)methyl)-1,4,5,6-tetrahydropyridin-2-yl diphenyl phosphate:**

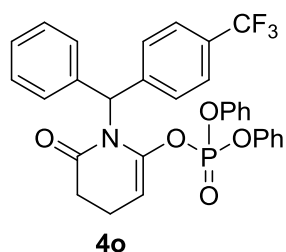

Was obtained according to **TP3** from KHMDS (110 mg, 0.550 mmol), 1-(phenyl(4-(trifluoromethyl)phenyl)methyl)piperidine-2,6-dione (**S5o**) (174 mg, 0.500 mmol) and  $\text{ClPO}(\text{OPh})_2$  (161 mg, 0.600 mmol). **Yield:** 75.0 mg, 26%; **appearance:** yellowish oil; **R<sub>f</sub>:** 0.45 (pentane:Et<sub>2</sub>O, 1:2);  $^1\text{H}$  NMR (600 MHz,  $\text{C}_6\text{D}_6$ ): 7.35–7.32 (m, 2 H), 7.29–7.23 (m, 4 H), 7.19 (s, 1 H), 7.14–7.11 (m, 2 H), 7.08–7.04 (m, 1 H), 6.99–6.96 (m, 4 H), 6.90–6.84 (m, 4 H), 6.79–6.74 (m, 2 H), 5.37 (td,  $J$  = 1.9, 5.1 Hz, 1 H), 2.17 (t,  $J$  = 7.8 Hz, 2 H), 1.62–1.57 (m, 2 H) ppm;  $^{19}\text{F}\{^1\text{H}\}$  NMR (376 MHz,  $\text{C}_6\text{D}_6$ ):  $\delta$  -62.0 ppm;  $^{31}\text{P}\{^1\text{H}\}$  NMR (162 MHz,  $\text{C}_6\text{D}_6$ ):  $\delta$  -19.1 ppm; IR (ATR):  $\nu_{\text{max}}$  = 3062, 3026, 2919, 2873, 1693, 1676, 1619, 1602, 1590, 1491, 1454, 1415, 1393, 1324, 1273, 1162, 1123, 1080, 1026, 1010, 966, 947, 840, 769, 755, 727, 692, 593, 559, 515, 463  $\text{cm}^{-1}$ ; HRMS (Multimode): calculated for  $[\text{C}_{31}\text{H}_{26}\text{F}_3\text{NO}_5\text{P}]^+$ : 580.1495, found: 580.1504.

**1-((4-Methoxyphenyl)(phenyl)methyl)-6-oxo-1,4,5,6-tetrahydropyridin-2-yl diphenyl phosphate:**

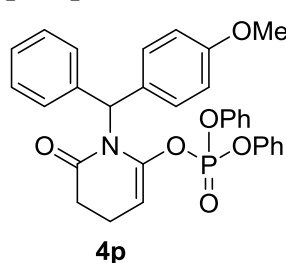

Was obtained according to **TP3** from KHMDS (110 mg, 0.550 mmol), 1-((4-methoxyphenyl)(phenyl)methyl)piperidine-2,6-dione (**S5p**) (155 mg, 0.500 mmol) and  $\text{ClPO}(\text{OPh})_2$  (161 mg, 0.600 mmol). **Yield:** 178 mg, 66%; **appearance:** colorless oil; **R<sub>f</sub>:** 0.4 (pentane:Et<sub>2</sub>O, 1:2);  $^1\text{H}$  NMR (400 MHz,  $\text{C}_6\text{D}_6$ ): 7.47–7.32 (m, 5 H), 7.13 (d,  $J$  = 7.8 Hz, 2 H), 7.10–6.98 (m, 5 H), 6.91–6.84 (m, 4 H), 6.83–6.67 (m, 4 H), 5.40 (td,  $J$  = 2.0, 5.1 Hz, 1 H), 2.20 (t,  $J$  = 7.5 Hz, 2 H), 1.69–1.54 (m, 2 H) ppm;  $^{31}\text{P}\{^1\text{H}\}$  NMR (162 MHz,  $\text{C}_6\text{D}_6$ ):  $\delta$  -19.1 ppm; HRMS (Multimode): calculated for  $[\text{C}_{31}\text{H}_{28}\text{NO}_6\text{P} + \text{H}]^+$ : 542.1727, found: 542.1736.

**6-Oxo-1-(phenyl(*p*-tolyl)methyl)-1,4,5,6-tetrahydropyridin-2-yl diphenyl phosphate:**

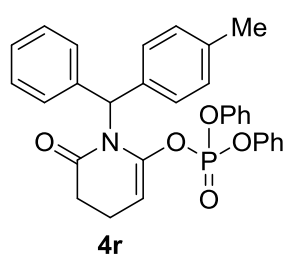

Was obtained according to **TP3** from KHMDS (110 mg, 0.550 mmol), 1-(phenyl(*p*-tolyl)methyl)piperidine-2,6-dione (**S5r**) (147 mg, 0.500 mmol) and  $\text{ClPO}(\text{OPh})_2$  (161 mg, 0.600 mmol). **Yield:** 143 mg, 54%; **appearance:** colorless oil; **R<sub>f</sub>:** 0.45 (pentane:Et<sub>2</sub>O, 1:2);  $^1\text{H}$  NMR (400 MHz,  $\text{C}_6\text{D}_6$ ): 7.49–7.43 (m, 2 H), 7.41–7.35 (m, 3 H), 7.13–7.09 (m, 2 H), 7.07–6.99 (m, 5 H), 6.94 (d,  $J$  = 7.8 Hz, 2 H), 6.89–6.83 (m, 4 H), 6.80–6.70 (m, 2 H), 5.40 (td,  $J$  = 2.0, 5.1 Hz, 1H), 2.17 (dd,  $J$  = 6.7, 8.2 Hz, 2 H), 2.06 (s, 3 H), 1.63–1.52 (m, 2 H) ppm;  $^{31}\text{P}\{^1\text{H}\}$  NMR (162 MHz,  $\text{C}_6\text{D}_6$ ):  $\delta$  -19.0 ppm; IR (ATR):  $\nu_{\text{max}}$  = 3060, 3027, 2919, 2849, 1687, 1673, 1589, 1513, 1487, 1454, 1393, 1344, 1311, 1298, 1272, 1159, 1127, 1009, 945, 902, 853, 825, 753, 727, 686,

*Supporting Information*

616, 582, 557, 513, 464  $\text{cm}^{-1}$ ; **HRMS** (Multimode): calculated for  $[\text{C}_{31}\text{H}_{28}\text{NO}_5\text{P} + \text{H}]^+$ : 526.1778, found: 526.1780.



**General procedure for the enantioselective C–H functionalization of enamide phosphates (GP1)**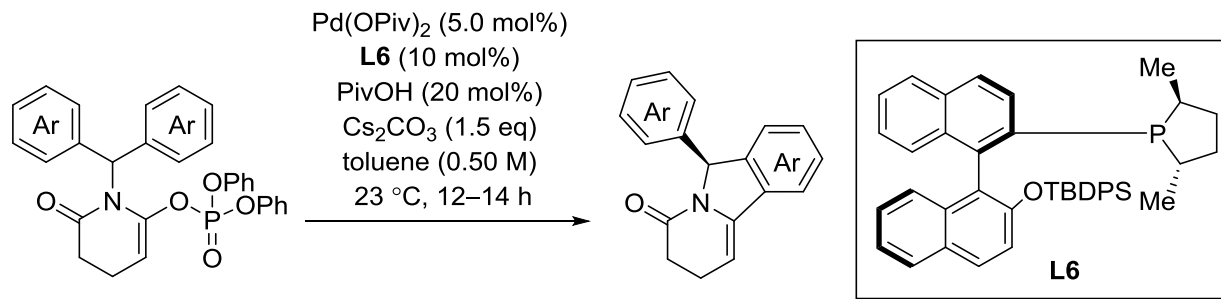

To an oven-dried 0.2–0.5 mL microwave vial equipped with a stir bar and open to air were added  $\text{Pd}(\text{OPiv})_2$  (1.54 mg, 5.00  $\mu\text{mol}$ , 5.0 mol%), ligand **L6** (6.23 mg, 10.0  $\mu\text{mol}$ , 10 mol%) and pivalic acid (2.04 mg, 20.0  $\mu\text{mol}$ , 20 mol%). The vial was transferred to a glovebox,  $\text{Cs}_2\text{CO}_3$  (49.0 mg, 150  $\mu\text{mol}$ , 1.50 eq) was added followed by the addition of the corresponding phosphate (100  $\mu\text{mol}$ , 1.00 eq) as a 0.50 M solution in toluene (200  $\mu\text{L}$ ). The vial was sealed, taken out of the glovebox and the reaction was stirred for 14 h at 23 °C. The reaction mixture was filtered through a plug of celite (eluting with EtOAc) and concentrated under reduced pressure. The resulting product was purified by chromatography on phosphate buffered silica gel (pentane:EtOAc or pentane:  $\text{CH}_2\text{Cl}_2$ ) and stabilized by addition of 4-methoxyphenol.

**Gram-scale preparation of 5a**

A pressure tube with Teflon screw-cap equipped with a stir bar was charged with  $\text{Pd}(\text{OPiv})_2$  (78.0 mg, 0.250 mmol, 5.0 mol%), ligand **L6** (312 mg, 0.500 mmol, 10 mol%) and pivalic acid (102 mg, 1.00 mmol, 20 mol%). The tube was transferred to a glovebox,  $\text{Cs}_2\text{CO}_3$  (2.44 g, 7.50 mmol, 1.50 eq) was added followed by the addition of phosphate **4a** (2.56 g, 5.00 mmol, 1.00 eq) and distilled toluene (10 mL, 0.5 M). The reaction tube was taken out of the glovebox and sealed. The reaction mixture was stirred for 48 h at 23 °C, then was filtered through a plug of celite (eluting with EtOAc) and concentrated under reduced pressure. Purification by column chromatography (pentane:  $\text{CH}_2\text{Cl}_2$ , 1:2) provided product **5a** in 80% yield (1.05 g) and 95.5:4.5 er.

## Characterisation data for isoindolines 5a–5m

## (S)-6-Phenyl-2,6-dihydropyrido[2,1-a]isoindol-4(3H)-one:

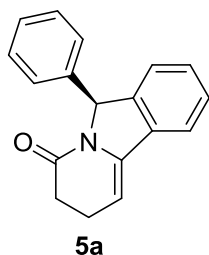

**Yield:** 22.5 mg, 86%; **appearance:** yellow powder; **R<sub>f</sub>**: 0.4 (CH<sub>2</sub>Cl<sub>2</sub>); **m.p.:** 89.6–90.5 °C; **<sup>1</sup>H NMR** (400 MHz, C<sub>6</sub>D<sub>6</sub>): δ 7.30–7.19 (m, 3 H), 7.11–7.05 (m, 2 H), 7.03–6.98 (m, 2 H), 6.93–6.87 (m, 1 H), 6.78–6.75 (m, 1 H), 6.08 (s, 1 H), 5.16 (dd, *J* = 3.4, 5.9 Hz, 1 H), 2.33–2.25 (m, 1 H), 2.22–2.12 (m, 1 H), 2.08–1.96 (m, 1 H), 1.94–1.84 (m, 1 H) ppm; **<sup>13</sup>C{<sup>1</sup>H} NMR** (101 MHz, C<sub>6</sub>D<sub>6</sub>): δ 167.6, 142.5, 141.7, 141.0, 133.4, 129.3, 128.8 (2 C), 128.4 (2 C), 127.7 (2 C), 124.3, 120.4, 94.6, 65.8, 31.7, 21.0 ppm; **IR** (ATR): ν<sub>max</sub> = 3061, 3029, 2928, 2895, 2838, 1729, 1668, 1612, 1600, 1493, 1467, 1454, 1381, 1343, 1313, 1267, 1210, 1178, 1141, 1107, 1075, 1029, 930, 749, 697, 609, 536, 477, 424 cm<sup>-1</sup>; **HRMS** (Multimode): calculated for [C<sub>18</sub>H<sub>15</sub>NO + H]<sup>+</sup>: 262.1226, found: 262.1236; **[α]<sub>D</sub><sup>20</sup>**: 2.8 (*c* = 1.0, CHCl<sub>3</sub>).

**Chiral HPLC** (Chiralpak IB, 4.6 x 250 mm; hexane:*i*-PrOH 80:20, 1.0 mL/min, 284 nm): *t<sub>R</sub>* (major) = 7.6 min, *t<sub>R</sub>* (minor) = 9.2 min, 94.3:5.7 er.

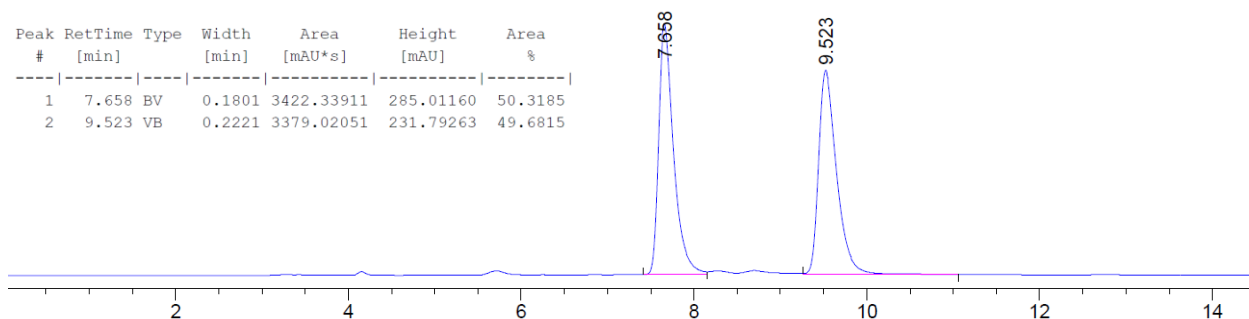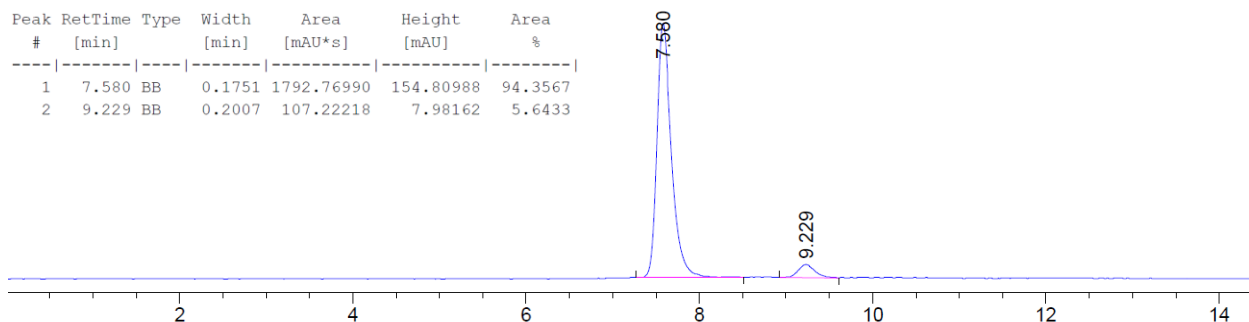

## gram-scale reaction

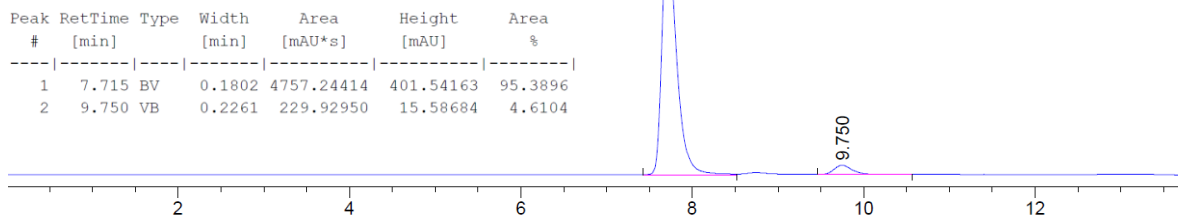

**(S)-9-methyl-6-(p-tolyl)-2,6-dihydropyrido[2,1-a]isoindol-4(3H)-one:**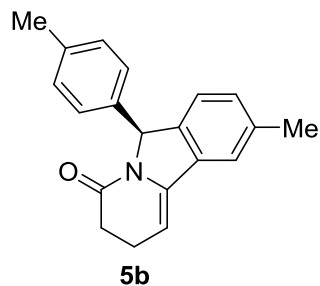

**Yield:** 24.0 mg, 83%; **appearance:** yellow oil; **R<sub>f</sub>**: 0.25 (CH<sub>2</sub>Cl<sub>2</sub>); **<sup>1</sup>H NMR** (400 MHz, C<sub>6</sub>D<sub>6</sub>): δ 7.26 (d, *J* = 8.2 Hz, 2 H), 7.14–7.09 (m, 1 H), 7.00–6.91 (m, 2 H), 6.77 (d, *J* = 1.3 Hz, 2 H), 6.15 (s, 1H), 5.20 (dd, *J* = 3.4, 5.8 Hz, 1 H), 2.37–2.29 (m, 1 H), 2.26–2.16 (m, 1 H), 2.11–2.00 (m, 1 H), 2.07 (s, 3 H), 2.03 (s, 3 H), 1.98–1.85 (m, 1 H) ppm; **<sup>13</sup>C{<sup>1</sup>H} NMR** (101 MHz, C<sub>6</sub>D<sub>6</sub>): δ 167.5, 141.3, 140.2, 139.1, 137.8, 137.3, 133.7, 130.4, 129.4 (2 C), 128.4 (2 C), 124.1, 120.7, 94.2, 65.5, 31.9, 21.3, 21.10, 21.06 ppm; **IR** (ATR): ν<sub>max</sub> = 3061, 3028, 2896, 2833, 1728, 1667, 1600, 1498, 1472, 1380, 1341, 1268, 1210, 1179, 1030, 931, 748, 693 cm<sup>-1</sup>; **HRMS** (Multimode): calculated for [C<sub>20</sub>H<sub>19</sub>NO + H]<sup>+</sup>: 290.1539, found: 290.1540; [α]<sub>D</sub><sup>20</sup>: 96 (c = 0.7, CHCl<sub>3</sub>).

**Chiral HPLC** (Chiralpak IF, 4.6 x 250 mm; hexane:*i*-PrOH 80:20, 1.0 mL/min, 286 nm): *t<sub>R</sub>* (major) = 11.8 min, *t<sub>R</sub>* (minor) = 15.4 min, 96.2:3.8 er.

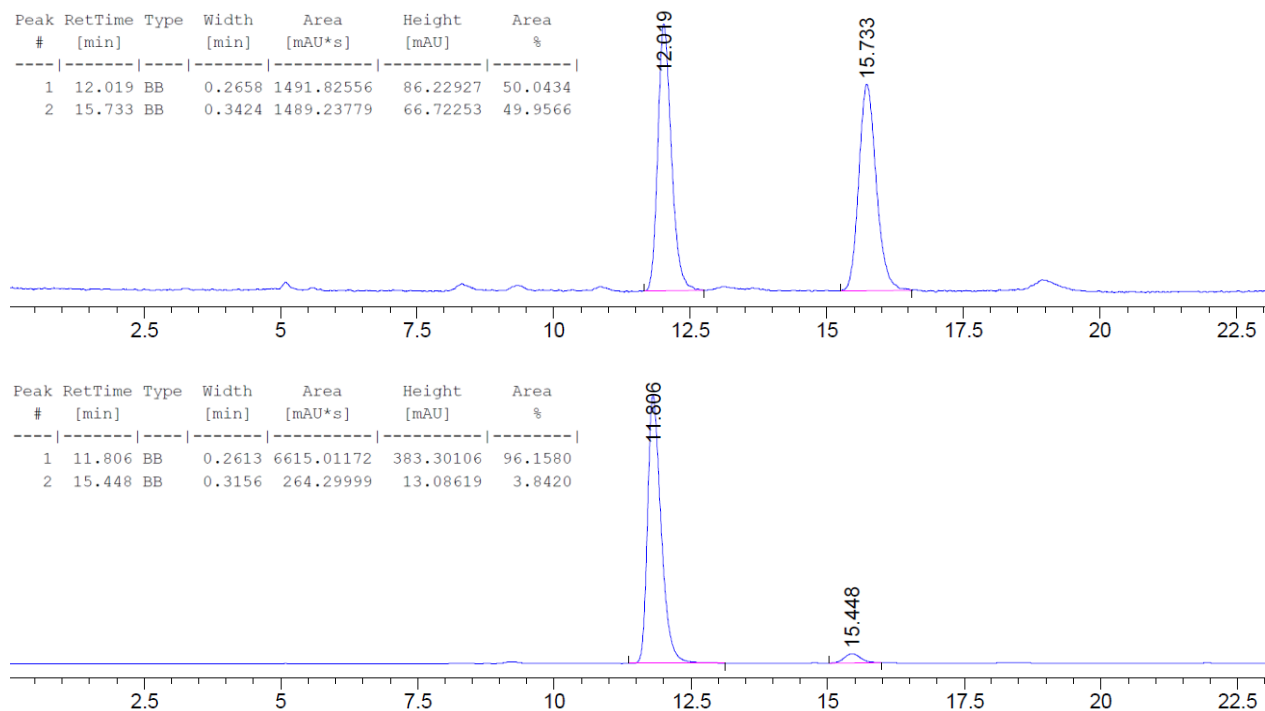

**(S)-6-([1,1'-biphenyl]-4-yl)-9-phenyl-2,3-dihydropyrido[2,1-a]isoindol-4(6H)-one:**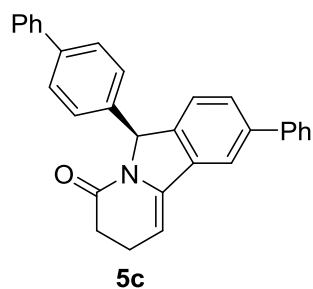

**Yield:** 37.5 mg, 91%; **appearance:** colorless oil; **R<sub>f</sub>:** 0.3 (CH<sub>2</sub>Cl<sub>2</sub>); **<sup>1</sup>H NMR** (600 MHz, C<sub>6</sub>D<sub>6</sub>): δ 7.64 (d, *J* = 1.9 Hz, 1 H), 7.52–7.38 (m, 8 H), 7.30–7.19 (m, 3 H), 7.19–7.16 (m, 3 H), 7.14–7.06 (m, 1 H), 6.88 (d, *J* = 7.9 Hz, 1 H), 6.23 (s, 1 H), 5.23 (dd, *J* = 3.3, 5.8 Hz, 1 H), 2.41–2.32 (m, 1 H), 2.30–2.19 (m, 1 H), 2.14–2.02 (m, 1 H), 1.98–1.88 (m, 1 H) ppm; **<sup>13</sup>C{<sup>1</sup>H} NMR** (151 MHz, C<sub>6</sub>D<sub>6</sub>): δ 172.2 (2 C), 138.9 (2 C), 128.8 (4 C), 128.2 (4 C), 127.3 (2 C), 58.4, 45.8 (2 C), 39.6, 37.8 (2 C), 24.5 (2 C); **IR** (ATR): ν<sub>max</sub> = 3057, 3029, 2929, 2894, 2838, 2278, 2267, 1731, 1671, 1599, 1486, 1475, 1425, 1381, 1321, 1263, 1216, 1205, 1180, 1139, 1125, 1076, 1008, 865, 825, 813, 759, 737, 697, 556, 499 cm<sup>-1</sup>; **HRMS** (Multimode): calculated for [C<sub>30</sub>H<sub>23</sub>NO + H]<sup>+</sup>: 414.1852, found: 414.1832; **[α]<sub>D</sub><sup>20</sup>**: 53 (c = 1.0, CHCl<sub>3</sub>).

**Chiral HPLC** (Chiralpak IF, 4.6 x 250 mm; hexane:*i*-PrOH 70:30, 1.0 mL/min, 274 nm): *t<sub>R</sub>* (major) = 16.3 min, *t<sub>R</sub>* (minor) = 26.8 min, 97.2:2.8 er.

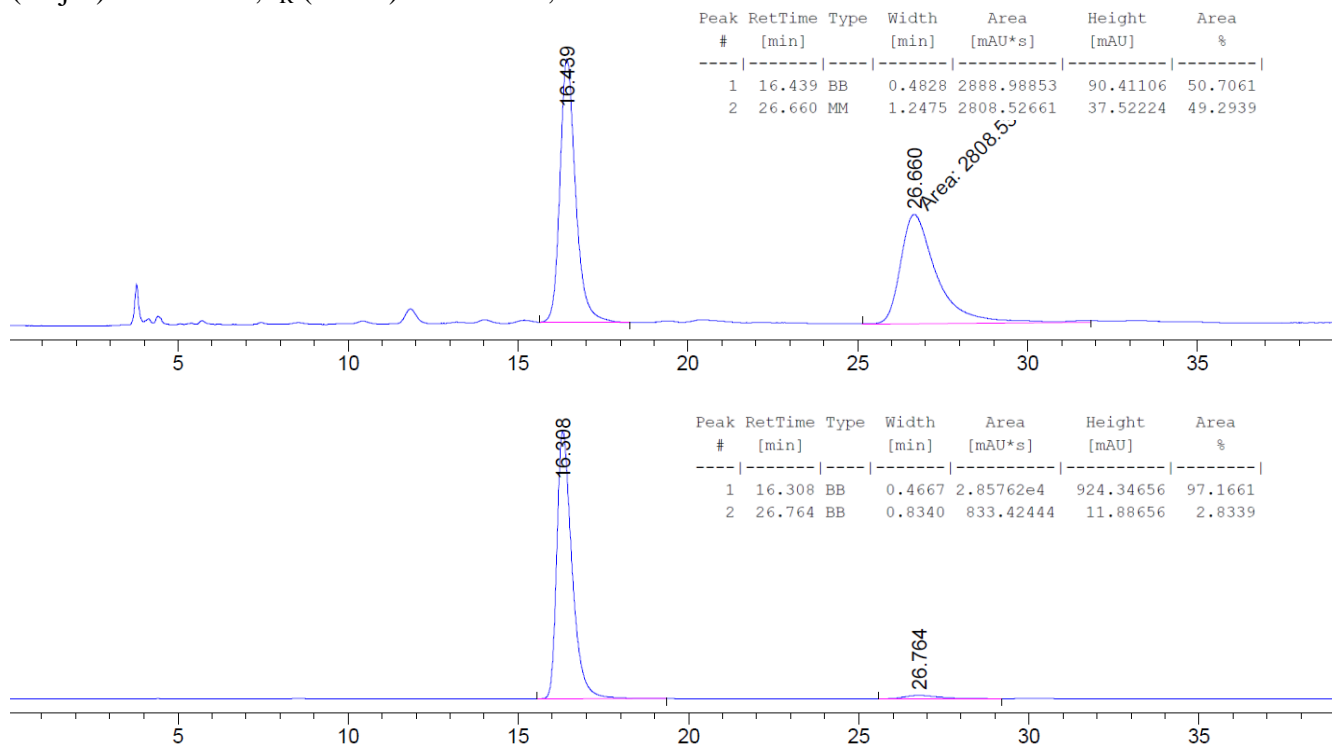

**(S)-9-fluoro-6-(4-fluorophenyl)-2,6-dihydropyrido[2,1-a]isoindol-4(3H)-one:**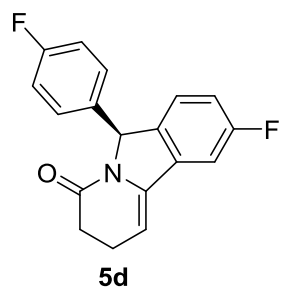

**Yield:** 26 mg, 87%; **appearance:** yellow oil; **R<sub>f</sub>**: 0.35 (CH<sub>2</sub>Cl<sub>2</sub>); **<sup>1</sup>H NMR** (400 MHz, C<sub>6</sub>D<sub>6</sub>): 7.03–6.95 (m, 2 H), 6.91–6.86 (m, 1 H), 6.78–6.71 (m, 2 H), 6.62–6.55 (m, 1 H), 6.42–6.36 (m, 1 H), 5.84 (s, 1 H), 4.95 (dd, *J* = 3.4, 5.9 Hz, 1 H), 2.28–2.19 (m, 1 H), 2.16–2.05 (m, 1 H), 1.99–1.87 (m, 1 H), 1.86–1.76 (m, 1 H) ppm; **<sup>13</sup>C{<sup>1</sup>H} NMR** (151 MHz, C<sub>6</sub>D<sub>6</sub>): δ 167.3, 163.9 (d, *J* = 89.0 Hz), 162.2 (d, *J* = 89.0 Hz), 140.0 (d, *J* = 4.1 Hz), 137.6 (d, *J* = 2.5 Hz), 137.1 (d, *J* = 3.6 Hz), 135.3 (d, *J* = 9.2 Hz), 129.5 (d, *J* = 8.1 Hz, 2 C), 125.8 (d, *J* = 9.2 Hz), 116.7 (d, *J* = 23.4 Hz), 115.6 (d, *J* = 21.4 Hz, 2 C), 107.1 (d, *J* = 23.9 Hz), 96.0, 64.5, 31.5, 21.0 ppm;

**<sup>19</sup>F{<sup>1</sup>H} NMR** (376 MHz, C<sub>6</sub>D<sub>6</sub>): δ -113.9, -114.4 ppm; **IR** (ATR): ν<sub>max</sub> = 1463, 3067, 2933, 2898, 2851, 1683, 1672, 1605, 1508, 1482, 1383, 1323, 1311, 1220, 1159, 863, 818, 579, 535 cm<sup>-1</sup>; **HRMS** (Multimode): calculated for [C<sub>18</sub>H<sub>13</sub>F<sub>2</sub>NO + H]<sup>+</sup>: 298.1038, found: 298.1047; **[α]<sub>D</sub><sup>20</sup>**: 16 (c = 0.2, CHCl<sub>3</sub>).

**Chiral HPLC** (Chiralpak IB, 4.6 x 250 mm; hexane:*i*-PrOH 95:5, 1.0 mL/min, 304 nm): *t<sub>R</sub>* (major) = 14.8 min, *t<sub>R</sub>* (minor) = 16.9 min, 95.3:4.7 er.

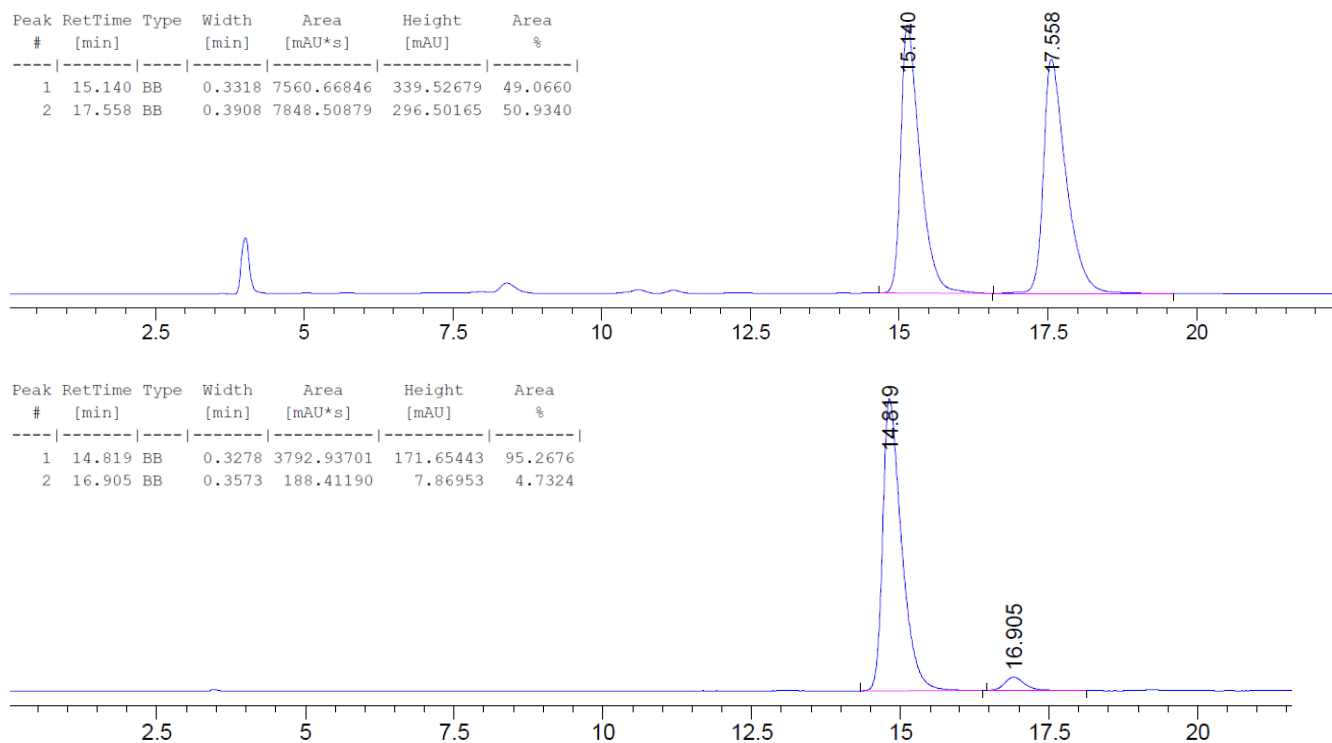

**(S)-9-chloro-6-(4-chlorophenyl)-2,6-dihydropyrido[2,1-a]isoindol-4(3H)-one:**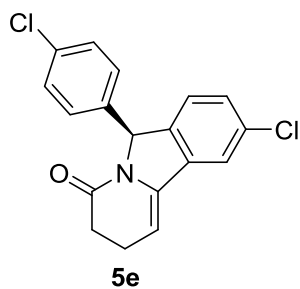

**Yield:** 25.0 mg, 76%; **Appearance:** yellow powder; **R<sub>f</sub>:** 0.3 (pentane:EtOAc, 4:1); **m.p.:** 179.6–181.3 °C; **<sup>1</sup>H NMR** (600 MHz, C<sub>6</sub>D<sub>6</sub>): δ 7.23 (d, *J* = 1.9 Hz, 1 H), 7.07–7.03 (m, 2 H), 6.94–6.83 (m, 3 H), 6.32 (d, *J* = 8.7 Hz, 1 H), 5.76 (s, 1 H), 4.92 (dd, *J* = 3.7, 5.7 Hz, 1 H), 2.26–2.16 (m, 1 H), 2.12–2.05 (m, 1 H), 1.98–1.86 (m, 1 H), 1.86–1.76 (m, 1 H) ppm; **<sup>13</sup>C{<sup>1</sup>H} NMR** (151 MHz, C<sub>6</sub>D<sub>6</sub>): δ 166.9, 139.7, 139.2, 134.7, 134.2, 133.6, 129.1, 128.7 (2 C), 128.6 (2 C), 128.0, 125.1, 120.3, 95.8, 64.3, 31.0, 20.6 ppm; **IR** (ATR): ν<sub>max</sub> = 2927, 2850, 1736, 1683, 1671, 1491, 1468, 1428, 1384, 1324, 1307, 1258, 1209, 1180, 1089, 1073, 1014, 815, 805, 532, 511, 452, cm<sup>-1</sup>; **HRMS** (Multimode): calculated for [C<sub>18</sub>H<sub>13</sub><sup>35</sup>Cl<sub>2</sub>NO + H]<sup>+</sup>: 330.0447, found: 330.0441; [α]<sub>D</sub><sup>20</sup>: 231 (c = 0.6, CHCl<sub>3</sub>).

**Chiral HPLC** (Chiralpak IA, 4.6 x 250 mm; hexane:*i*-PrOH 80:20, 1.0 mL/min, 322 nm): *t<sub>R</sub>* (major) = 9.8 min, *t<sub>R</sub>* (minor) = 17.8 min, 94.5:5.5 er.

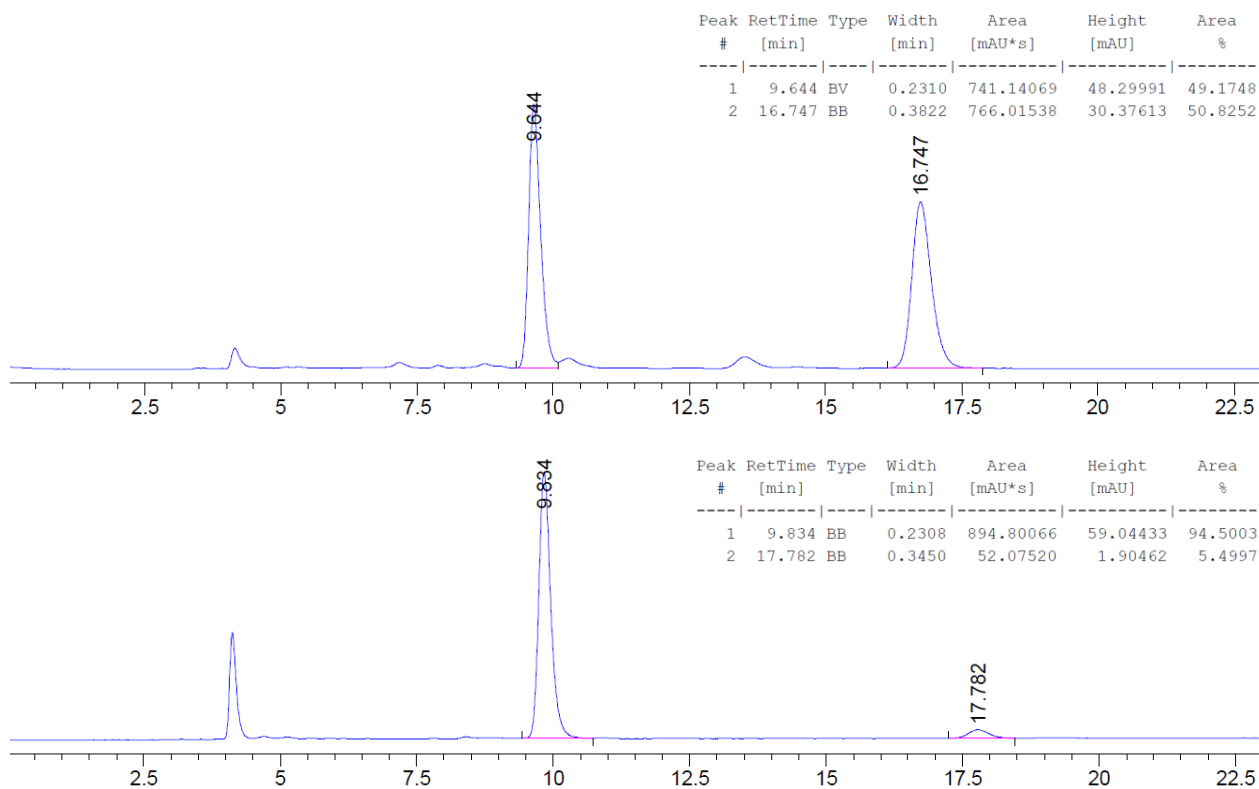

**(S)-9-(trifluoromethyl)-6-(4-(trifluoromethyl)phenyl)-2,6-dihydropyrido[2,1-*a*]isoindol-4(3*H*)-one:**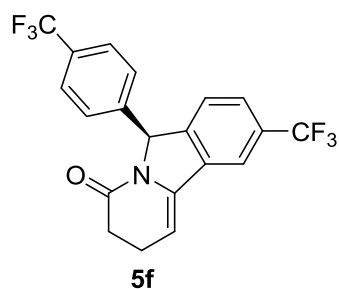

**Yield:** 31.5 mg, 79%; **Appearance:** yellow oil; **R<sub>f</sub>:** 0.15 (pentane:CH<sub>2</sub>Cl<sub>2</sub>, 1:2); **<sup>1</sup>H NMR** (400 MHz, C<sub>6</sub>D<sub>6</sub>): δ 7.57–7.49 (m, 1 H), 7.29 (d, *J* = 8.2 Hz, 2 H), 7.13–7.08 (m, 1 H), 6.96 (d, *J* = 8.0 Hz, 2 H), 6.47–6.35 (m, 1 H), 5.79 (s, 1 H), 4.90 (dd, *J* = 3.5, 5.8 Hz, 1 H), 2.28–2.19 (m, 1 H), 2.15–2.05 (m, 1 H), 1.99–1.88 (m, 1 H), 1.87–1.73 (m, 1 H) ppm; **<sup>13</sup>C{<sup>1</sup>H} NMR** (101 MHz, C<sub>6</sub>D<sub>6</sub>): δ 167.3, 144.5, 144.4, 139.3, 134.1, 131.0 (q, *J* = 32.3), 130.3 (q, *J* = 32.4), 126.0 (q, *J* = 3.7), 125.9 (q, *J* = 3.7, 2 C), 124.7 (2 C), 117.77, 117.73, 96.9, 64.9, 31.2, 21.0 ppm, 2 signals are missing; **<sup>19</sup>F{<sup>1</sup>H}**

**NMR** (376 MHz, C<sub>6</sub>D<sub>6</sub>): δ -62.1, -62.3 ppm; **IR** (ATR): ν<sub>max</sub> = 3377, 2931, 2857, 1733, 1683, 1619, 1420, 1380, 1323, 1266, 1241, 1166, 1119, 1068, 1018, 1002, 855, 841, 766, 732, 705, 604, 563, 441 cm<sup>-1</sup>; **HRMS** (Multimode): calculated for [C<sub>20</sub>H<sub>13</sub>F<sub>6</sub>NO + H]<sup>+</sup>: 398.0974, found: 398.0974; [α]<sub>D</sub><sup>20</sup>: 12 (c = 0.5, CHCl<sub>3</sub>).

**Chiral HPLC** (Chiralpak IC, 4.6 x 250 mm; hexane:*i*-PrOH 80:20, 1.0 mL/min, 290 nm): *t*<sub>R</sub> (major) = 7.6 min, *t*<sub>R</sub> (minor) = 9.0 min, 97.0:3.0 er.

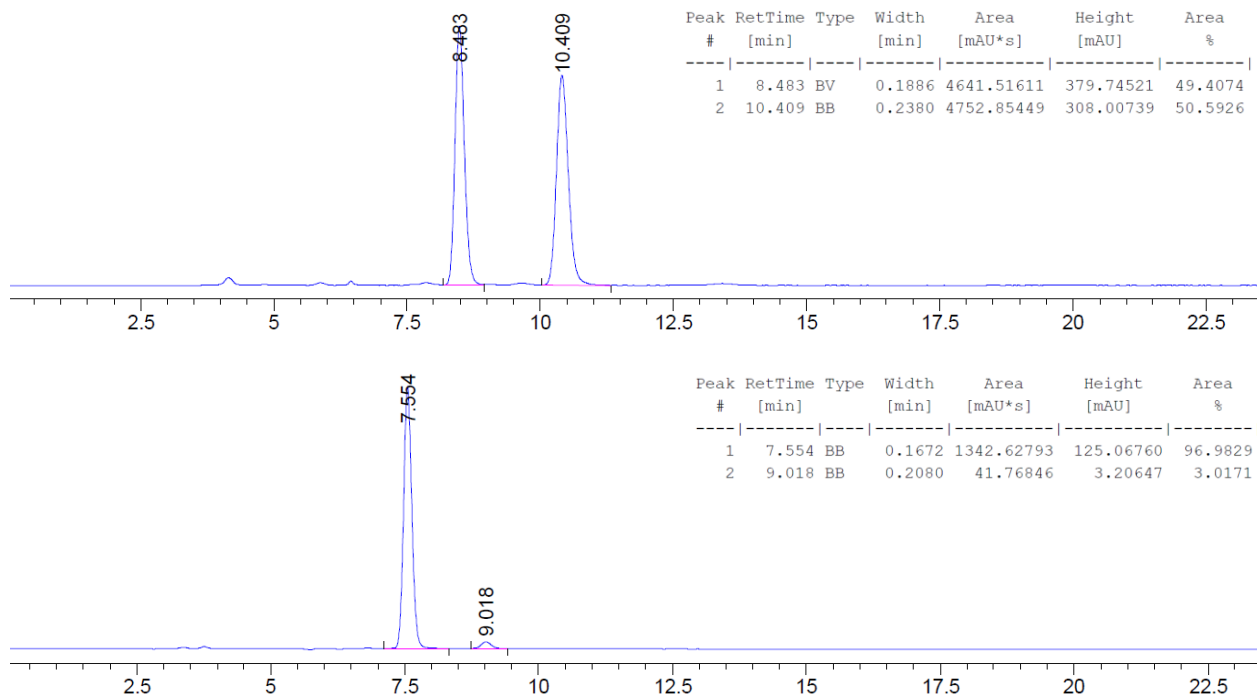

**(S)-9-methoxy-6-(4-methoxyphenyl)-2,6-dihydropyrido[2,1-*a*]isoindol-4(3*H*)-one:**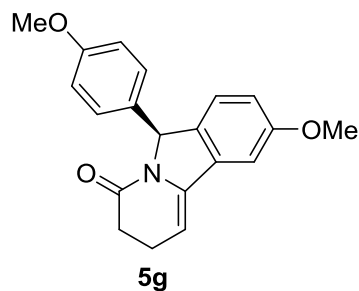

**Yield:** 26.5 mg, 82%; **Appearance:** yellow oil; **R<sub>f</sub>**: 0.1 (CH<sub>2</sub>Cl<sub>2</sub>); **<sup>1</sup>H NMR** (400 MHz, C<sub>6</sub>D<sub>6</sub>): δ 7.28 (d, *J* = 8.8 Hz, 2 H), 6.94 (d, *J* = 2.4 Hz, 1 H), 6.78–6.73 (m, 3 H), 6.69–6.65 (m, 1 H), 6.16 (s, 1 H), 5.12 (dd, *J* = 3.3, 5.9 Hz, 1 H), 3.30 (s, 3 H), 3.23 (s, 3 H), 2.37–2.29 (m, 1 H), 2.26–2.16 (m, 1 H), 2.08–1.97 (m, 1 H), 1.93–1.84 (m, 1 H) ppm; **<sup>13</sup>C{<sup>1</sup>H} NMR** (151 MHz, C<sub>6</sub>D<sub>6</sub>): δ 167.5, 160.4, 159.7, 141.1, 135.2, 134.9, 134.1, 129.3 (2 C), 125.3, 116.5, 114.2 (2 C), 104.6, 94.6, 65.0, 55.0, 54.7, 31.9, 21.1 ppm; **IR** (ATR): ν<sub>max</sub> = 2995, 2923, 2836, 1728, 1670, 1610, 1511, 1490, 1385, 1319, 1245, 1174, 1031, 856, 814, 584, 553, 540, cm<sup>-1</sup>; **HRMS** (Multimode): calculated for [C<sub>20</sub>H<sub>19</sub>NO<sub>3</sub> + H]<sup>+</sup>: 322.1438, found: 322.1442; [α]<sub>D</sub><sup>20</sup>: 36 (c = 0.2, CHCl<sub>3</sub>).

**Chiral HPLC** (Chiralpak IA, 4.6 x 250 mm; hexane:*i*-PrOH 80:20, 1.0 mL/min, 308 nm): *t*<sub>R</sub> (major) = 13.5 min, *t*<sub>R</sub> (minor) = 18.8 min, 94.5:5.5 er.

| Peak # | RetTime [min] | Type | Width [min] | Area [mAU*s] | Height [mAU] | Area %  |
|--------|---------------|------|-------------|--------------|--------------|---------|
| 1      | 12.669        | BB   | 0.3219      | 1065.99121   | 50.17023     | 50.4103 |
| 2      | 17.137        | BB   | 0.4181      | 1048.64063   | 38.46162     | 49.5897 |

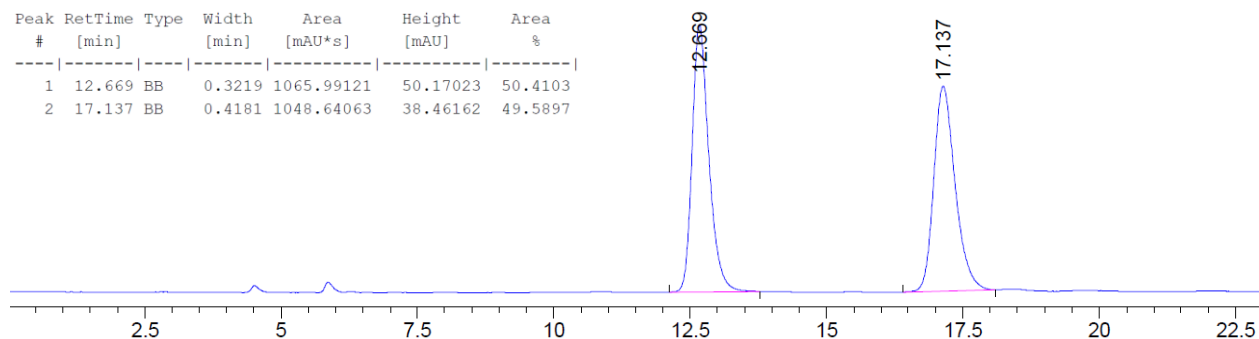

| Peak # | RetTime [min] | Type | Width [min] | Area [mAU*s] | Height [mAU] | Area %  |
|--------|---------------|------|-------------|--------------|--------------|---------|
| 1      | 13.539        | BB   | 0.3525      | 558.58063    | 23.91073     | 94.4505 |
| 2      | 18.813        | BB   | 0.3968      | 32.81994     | 1.01094      | 5.5495  |

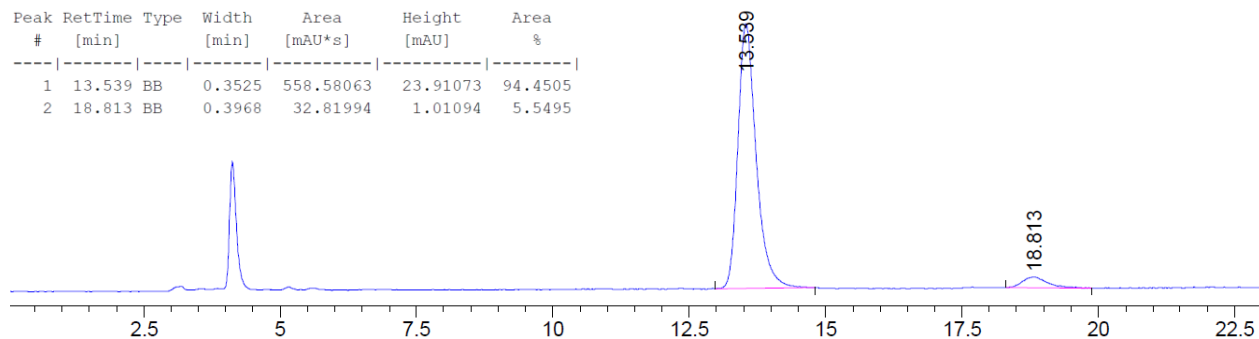



**(S)-8-(trifluoromethyl)-6-(3-(trifluoromethyl)phenyl)-2,6-dihydropyrido[2,1-*a*]isoindol-4(3*H*)-one:**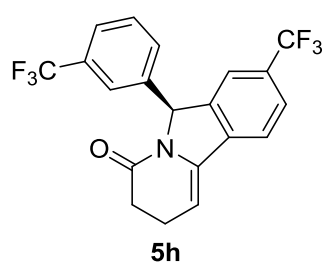

**Yield:** 35.0 mg, 88%; **appearance:** colorless oil; **R<sub>f</sub>:** 0.1 (pentane:EtOAc, 4:1); **<sup>1</sup>H NMR** (400 MHz, C<sub>6</sub>D<sub>6</sub>): δ 7.67 (d, *J* = 1.9 Hz, 1 H), 7.21 (d, *J* = 8.2 Hz, 1 H), 7.10–7.03 (m, 2 H), 6.92–6.89 (1 H), 6.80–6.76 (m, 1 H), 5.84 (s, 1 H), 5.03 (dt, *J* = 3.1, 6.1 Hz, 1H), 2.23–2.15 (m, 1 H), 2.08–2.03 (m, 1 H), 1.92–1.85 (m, 1 H), 1.82–1.76 (m, 1 H) ppm; **<sup>13</sup>C{<sup>1</sup>H} NMR** (201 MHz, C<sub>6</sub>D<sub>6</sub>): δ 167.4, 141.7, 139.4, 136.7, 131.4, 131.2, 130.7, 129.6, 128.4, 125.8 (q, *J* = 3.7 Hz), 125.4, 125.2 (q, *J* = 3.7 Hz), 124.4 (q, *J* = 4.0 Hz), 124.0, 123.8, 121.3 (q, *J* = 4.0 Hz), 121.1, 97.7, 64.9, 31.2, 20.9 ppm; **<sup>19</sup>F{<sup>1</sup>H} NMR** (376 MHz, C<sub>6</sub>D<sub>6</sub>): δ -62.0, -62.3 ppm; **IR** (ATR): ν<sub>max</sub> = 3367, 2923, 2852, 1741, 1684, 1436, 1384, 1327, 1283, 1164, 1121, 1073, 1063, 939, 919, 904, 838, 701, 662 cm<sup>-1</sup>; **HRMS** (Multimode): calculated for [C<sub>20</sub>H<sub>13</sub>F<sub>6</sub>NO + H]<sup>+</sup>: 398.0974, found: 398.0984; [α]<sub>D</sub><sup>20</sup>: 25 (c = 0.5, CHCl<sub>3</sub>).

**Chiral HPLC** (Chiralpak IC, 4.6 x 250 mm; hexane:*i*-PrOH 90:10, 1.0 mL/min, 302 nm): *t*<sub>R</sub> (major) = 10.0 min, *t*<sub>R</sub> (minor) = 11.8 min, 91.6:8.4 er.

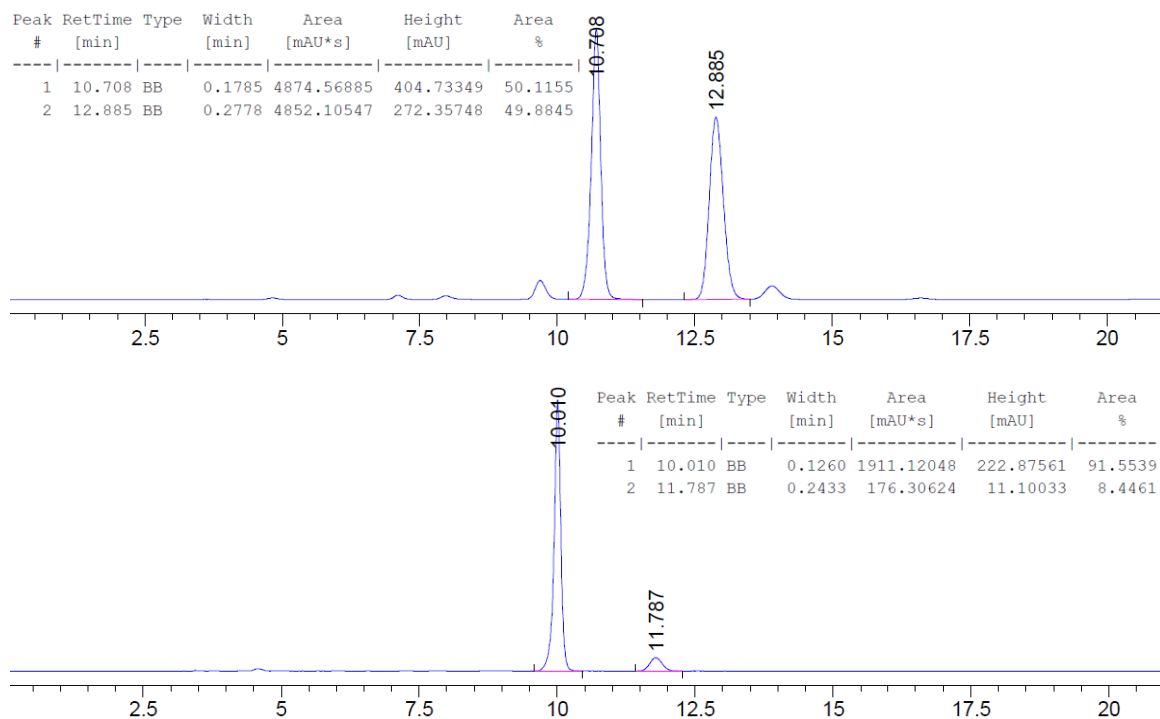

**(S)-6-(naphthalen-2-yl)-2,6-dihydrobenzo[*f*]pyrido[2,1-*a*]isoindol-4(3*H*)-one:**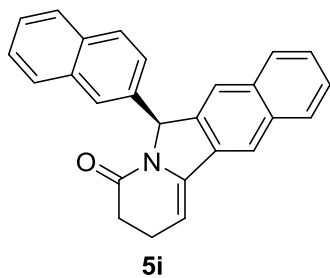

**Yield:** 26.5 mg, 73%; **appearance:** yellow oil; **R<sub>f</sub>:** 0.2 (pentane:EtOAc, 4:1); **<sup>1</sup>H NMR** (400 MHz, C<sub>6</sub>D<sub>6</sub>): δ 8.00–7.95 (m, 1 H), 7.79 (s, 1 H), 7.68–7.59 (m, 2 H), 7.57–7.48 (m, 2 H), 7.40–7.28 (m, 3 H), 7.26–7.18 (m, 4 H), 6.46 (s, 1 H), 5.39 (dd, *J* = 3.3, 5.9 Hz, 1 H), 2.41–2.33 (m, 1 H), 2.30–2.20 (m, 1 H), 2.17–2.06 (m, 1 H), 2.03–1.92 (m, 1 H) ppm; **<sup>13</sup>C{<sup>1</sup>H} NMR** (151 MHz, C<sub>6</sub>D<sub>6</sub>): δ 167.7, 140.6, 140.5, 139.7, 134.6, 133.9, 133.8, 133.6, 132.2, 128.9, 128.6, 128.5, 128.5, 127.6, 127.2, 126.50, 126.47, 126.4, 126.2, 125.2, 123.6, 119.3, 95.6, 65.6, 31.7, 21.2 ppm; **IR** (ATR): ν<sub>max</sub> = 3347, 3055, 2966, 2925, 2854, 1730, 1702, 1637, 1509, 1453, 1374, 1341, 1318, 1267, 1214, 1171, 1143, 1126, 1040, 951, 919, 891, 859, 823, 758, 477 cm<sup>-1</sup>; **HRMS** (Multimode): calculated for [C<sub>26</sub>H<sub>19</sub>NO + H]<sup>+</sup>: 362.1539, found: 362.1531; [α]<sub>D</sub><sup>20</sup>: 58 (*c* = 0.5, CHCl<sub>3</sub>).

**Chiral HPLC** (Chiralpak ID, 4.6 x 250 mm; hexane:*i*-PrOH 80:20, 1.0 mL/min, 240 nm): *t<sub>R</sub>* (major) = 25.0 min, *t<sub>R</sub>* (minor) = 36.4 min, 88.8:11.2 er.

| Peak # | RetTime [min] | Type | Width [min] | Area [mAU*s] | Height [mAU] | Area %  |
|--------|---------------|------|-------------|--------------|--------------|---------|
| 1      | 25.049        | BB   | 0.5450      | 3959.76147   | 93.32450     | 49.6866 |
| 2      | 36.538        | MM   | 1.1810      | 4009.70703   | 56.58869     | 50.3134 |

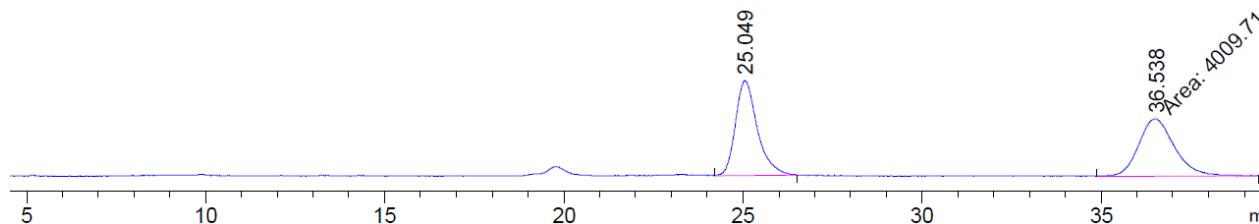

| Peak # | RetTime [min] | Type | Width [min] | Area [mAU*s] | Height [mAU] | Area %  |
|--------|---------------|------|-------------|--------------|--------------|---------|
| 1      | 24.814        | BB   | 0.6391      | 7.17150e4    | 1731.95068   | 88.8437 |
| 2      | 36.410        | BB   | 1.0589      | 9005.41211   | 124.65203    | 11.1563 |

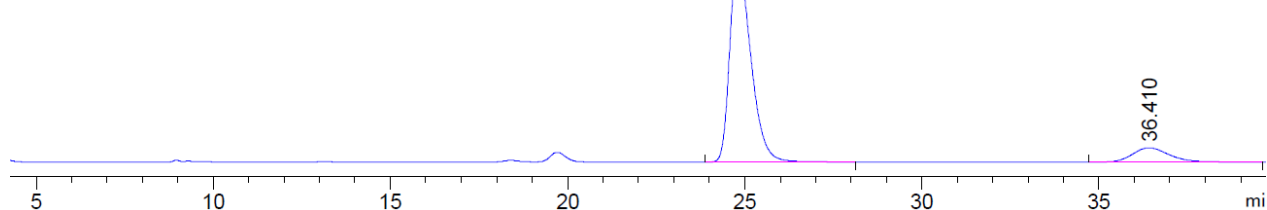

**(S)-9-(thiophen-2-yl)-5,9-dihydrothieno[3,2-*a*]indolizin-7(6*H*)-one:**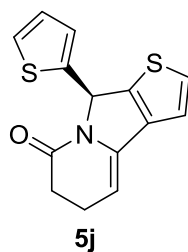

**Yield:** 16.0 mg, 59%; **appearance:** yellow oil; **R<sub>f</sub>:** 0.3 (CH<sub>2</sub>Cl<sub>2</sub>); **<sup>1</sup>H NMR** (400 MHz, C<sub>6</sub>D<sub>6</sub>): δ 7.18–7.21 (m, 1 H), 6.76–6.70 (m, 2 H), 6.64 – 6.60 (m, 1 H), 6.59–6.55 (m, 1 H), 6.48 (s, 1 H), 4.84 (dd, *J* = 3.1, 6.1 Hz, 1 H), 2.30–2.21 (m, 1 H), 2.15–2.04 (m, 1 H), 1.95–1.82 (m, 1 H), 1.80–1.69 (m, 1 H) ppm; **<sup>13</sup>C{<sup>1</sup>H} NMR** (151 MHz, C<sub>6</sub>D<sub>6</sub>): δ 167.8, 143.7, 143.7, 139.8, 137.1, 131.2, 127.5, 126.7, 125.8, 118.2, 94.7, 59.1, 31.6, 20.7 ppm; **IR** (ATR): ν<sub>max</sub> = 3101, 2955, 2917, 2896, 2848, 1727, 1667, 1597, 1537, 1464, 1403, 1374, 1318, 1292, 1208, 1117, 855, 756, 711, 672 cm<sup>-1</sup>; **HRMS** (APPI): calculated for [C<sub>14</sub>H<sub>11</sub>NOS<sub>2</sub> + H]<sup>+</sup>: 274.0355, found: 274.0365; [α]<sub>D</sub><sup>20</sup>: 5.0 (*c* = 1.0, CHCl<sub>3</sub>).

**Chiral HPLC** (Chiralpak IF, 4.6 x 250 mm; hexane:*i*-PrOH 80:20, 1.0 mL/min, 276 nm): *t<sub>R</sub>* (major) = 12.4 min, *t<sub>R</sub>* (minor) = 14.7 min, 95.9:4.1 er.

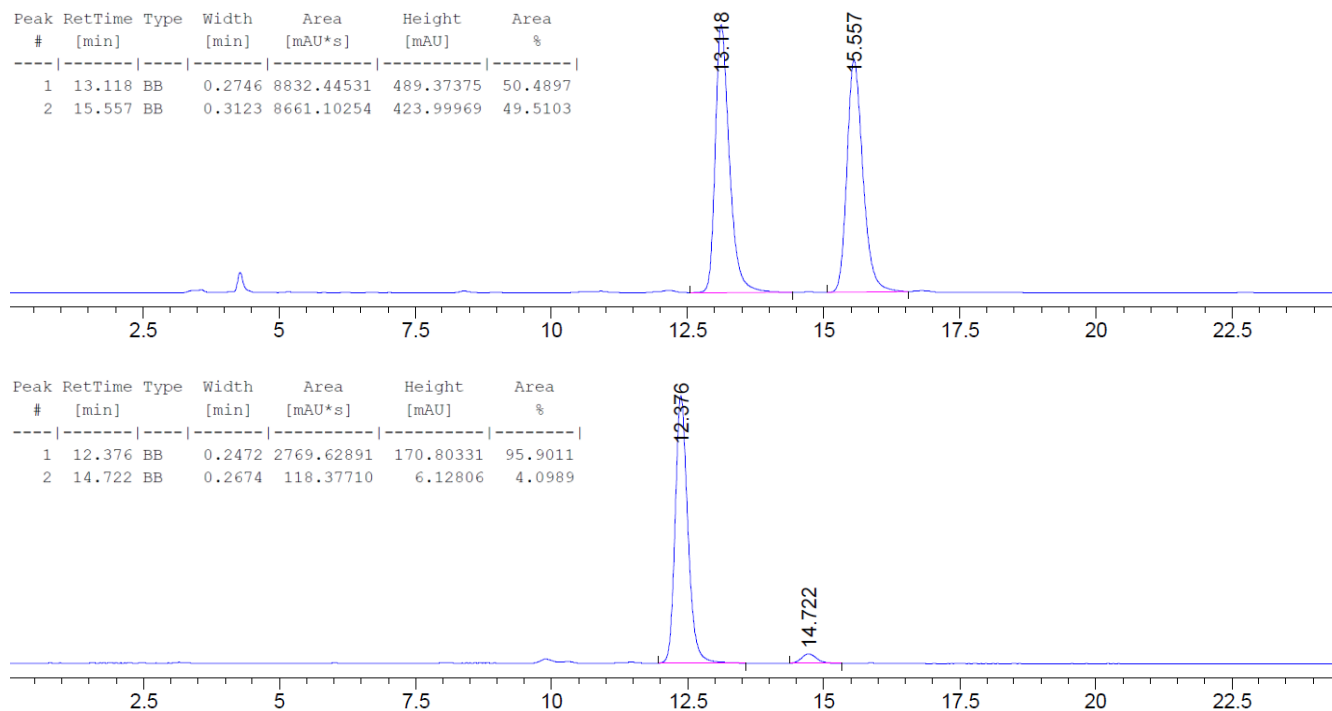

**(S)-6-(*o*-tolyl)-2,3,6,11-tetrahydro-4*H*-pyrido[1,2-*b*]isoquinolin-4-one:**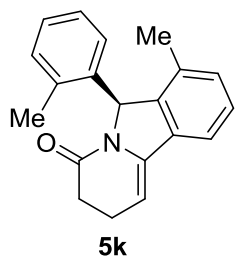

**Yield:** 18.0 mg, 62%; **appearance:** colorless oil; **R<sub>f</sub>:** 0.5 (pentane:EtOAc, 4:1); **<sup>1</sup>H NMR** (400 MHz, C<sub>6</sub>D<sub>6</sub>): δ 7.18 (d, *J* = 7.3 Hz, 1 H), 7.07–6.69 (m, 6 H), 6.10 (s, 1 H), 5.18 (dd, *J* = 3.6, 5.6 Hz, 1 H), 2.76 (br. s, 3 H), 2.27–2.10 (m, 2 H), 2.03–1.82 (m, 2 H), 1.64 (s, 3 H) ppm; **<sup>13</sup>C{<sup>1</sup>H} NMR** (151 MHz, C<sub>6</sub>D<sub>6</sub>): δ 167.1, 141.4, 138.5, 137.4, 134.13, 133.9, 130.7, 130.6, 128.5, 128.2, 127.9, 127.7, 126.6, 117.8, 94.3, 60.1, 31.7, 21.1, 19.9, 18.0 ppm; **IR** (ATR): ν<sub>max</sub> = 3018, 2946, 2900, 2841, 1732, 1681, 1670, 1485, 1463, 1384, 1354, 1321, 1308, 1208, 1140, 1108, 957, 777, 744, 726, 677, 621, 541, 501, 486, 469 cm<sup>-1</sup>; **HRMS** (Multimode): calculated for [C<sub>20</sub>H<sub>19</sub>NO + H]<sup>+</sup>: 290.1539, found: 290.1541; [α]<sub>D</sub><sup>20</sup>: 19.2 (c = 0.2, CHCl<sub>3</sub>).

**Chiral HPLC** (Chiralpak IB, 4.6 x 250 mm; hexane:*i*-PrOH 95:5, 1.0 mL/min, 288 nm): *t*<sub>R</sub> (major) = 9.1 min, *t*<sub>R</sub> (minor) = 10.7 min, 73:27 er.

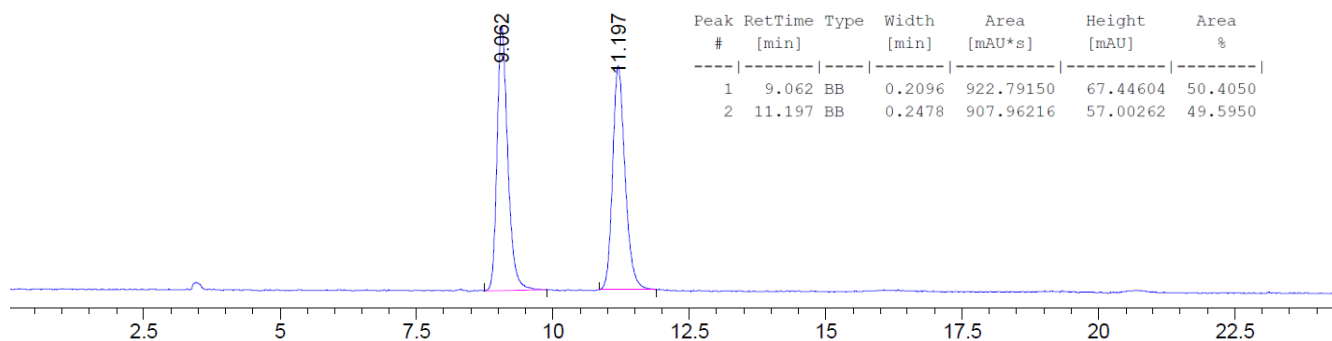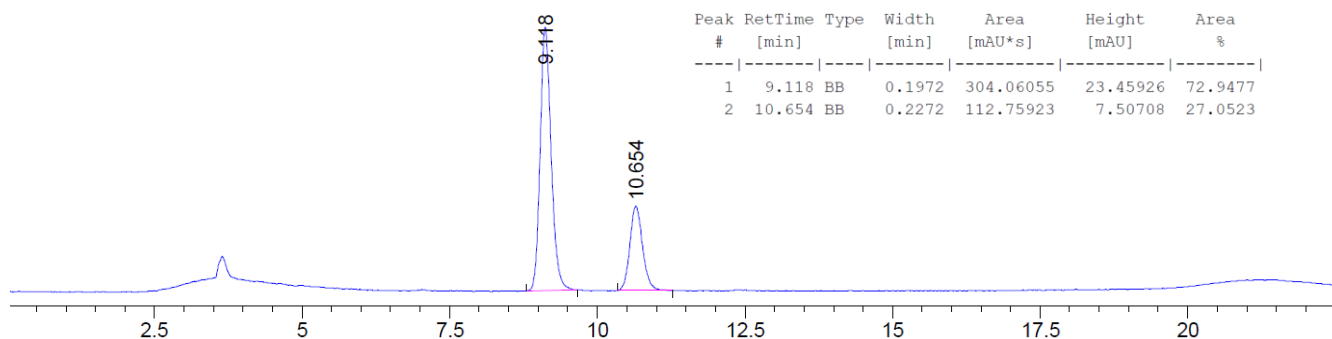

**(S)-2,2-dimethyl-6-phenyl-2,6-dihydropyrido[2,1-a]isoindol-4(3H)-one:**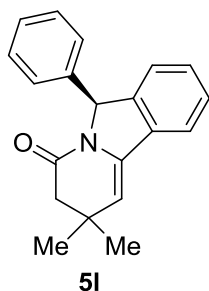

**Yield:** 22.0 mg, 76%; **appearance:** yellow oil; **R<sub>f</sub>:** 0.25 (CH<sub>2</sub>Cl<sub>2</sub>); **<sup>1</sup>H NMR** (400 MHz, C<sub>6</sub>D<sub>6</sub>): δ 7.31–7.21 (m, 3 H), 7.12–7.04 (m, 2 H), 7.03–6.96 (m, 2 H), 6.92–6.87 (m, 1 H), 6.78–6.74 (m, 1 H), 6.07 (s, 1 H), 5.18 (d, *J* = 1.0 Hz, 1 H), 2.36–2.16 (m, 2 H), 0.93 (s, 3 H), 0.92 (s, 3 H) ppm; **<sup>13</sup>C{<sup>1</sup>H} NMR** (151 MHz, C<sub>6</sub>D<sub>6</sub>): δ 167.0, 143.0, 141.8, 139.0, 133.3, 129.3, 128.8 (2 C), 128.4 (2 C), 127.5 (2 C), 124.3, 120.5, 105.8, 65.7, 46.8, 32.8, 29.2, 27.6 ppm; **IR** (ATR): ν<sub>max</sub> = 3061, 3030, 2955, 2927, 2867, 1731, 1680, 1602, 1494, 1466, 1455, 1371, 1303, 1217, 1142, 961, 936, 750, 729, 697, 549 cm<sup>-1</sup>; **HRMS** (Multimode): calculated for [C<sub>20</sub>H<sub>19</sub>NO + H]<sup>+</sup>: 290.1539, found: 290.1543;

**[α]<sub>D</sub><sup>20</sup>:** 8.3 (c = 0.5, CHCl<sub>3</sub>).

**Chiral HPLC** (Chiralpak ID, 4.6 x 250 mm; hexane:*i*-PrOH 80:20, 1.0 mL/min, 306 nm): *t<sub>R</sub>* (major) = 10.2 min, *t<sub>R</sub>* (minor) = 18.2 min, 85.2:14.8 er.

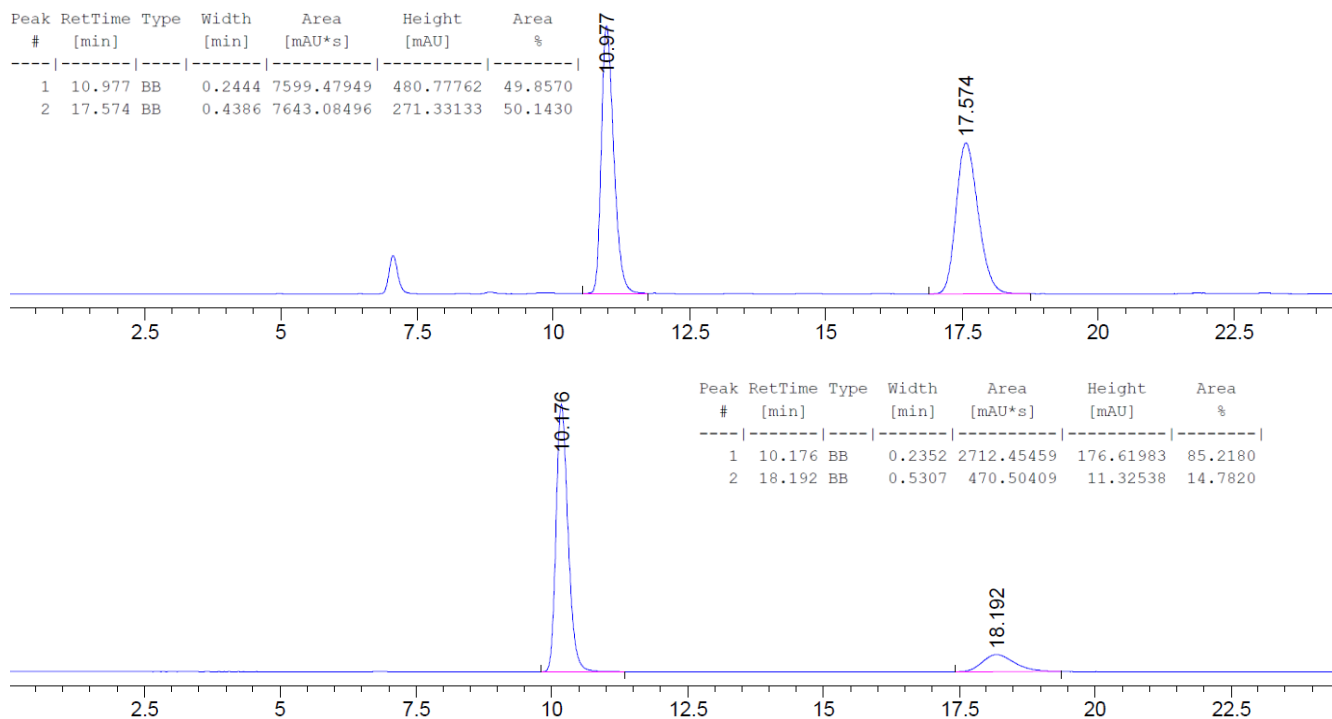

**(S)-6'-phenyl-6'H-spiro[cyclopentane-1,2'-pyrido[2,1-a]isoindol]-4'(3'H)-one:**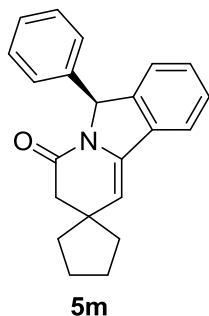

**Yield:** 24 mg, 83%; **appearance:** yellow oil; **R<sub>f</sub>:** 0.3 (CH<sub>2</sub>Cl<sub>2</sub>); **<sup>1</sup>H NMR** (400 MHz, C<sub>6</sub>D<sub>6</sub>): δ 7.30–7.21 (m, 3 H), 7.12–7.06 (m, 2 H), 7.05–6.96 (m, 2 H), 6.93–6.87 (m, 1 H), 6.82–6.72 (m, 1 H), 6.09 (s, 1 H), 5.34 (s, 1 H), 2.46–2.27 (m, 2 H), 1.58–1.28 (m, 8 H) ppm; **<sup>13</sup>C{<sup>1</sup>H} NMR** (151 MHz, C<sub>6</sub>D<sub>6</sub>): δ 167.1, 142.9, 141.8, 139.4, 133.3, 129.3, 128.8 (2 C), 128.4 (2 C), 127.4 (2 C), 124.3, 120.5, 105.4, 65.7, 44.2, 43.9, 39.8, 39.0, 24.1, 23.9 ppm; **IR** (ATR): ν<sub>max</sub> = 3058, 3030, 2952, 2874, 1679, 1493, 1467, 1454, 1375, 1302, 1188, 1145, 1113, 955, 750, 697, 542 cm<sup>-1</sup>; **HRMS** (Multimode): calculated for [C<sub>22</sub>H<sub>21</sub>NO + H]<sup>+</sup>: 316.1696, found: 316.1702; [α]<sub>D</sub><sup>20</sup>: 5.3 (c = 0.5, CHCl<sub>3</sub>).

**Chiral HPLC** (Chiralpak ID, 4.6 x 250 mm; hexane:*i*-PrOH 80:20, 1.0 mL/min, 286 nm): *t<sub>R</sub>* (major) = 14.5 min, *t<sub>R</sub>* (minor) = 20.5 min, 85.5:14.5 er.

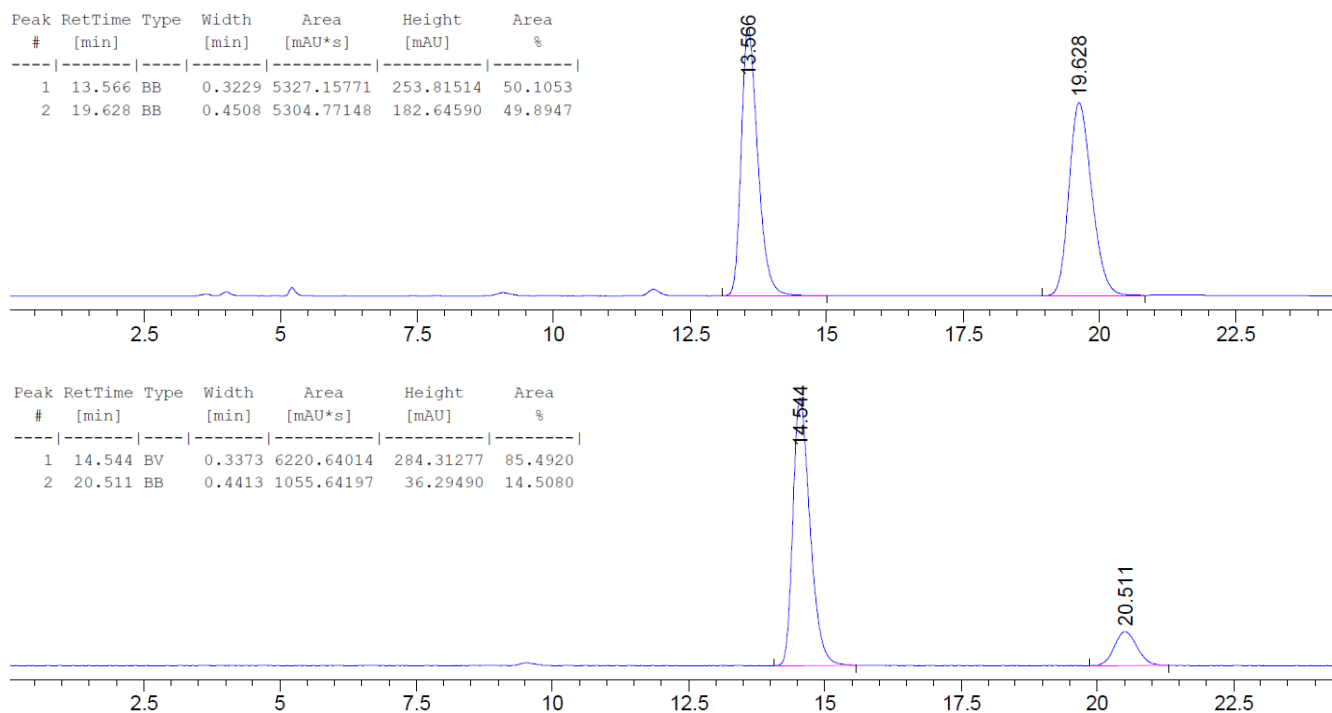

## Parallel kinetic resolution

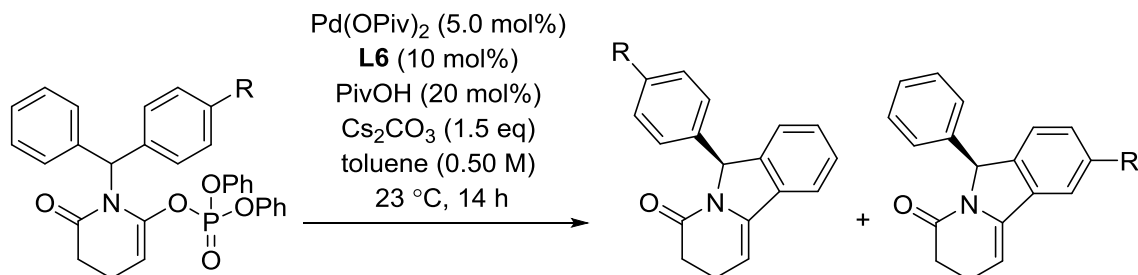

**(S)-6-(4-fluorophenyl)-2,6-dihydropyrido[2,1-a]isoindol-4(3H)-one and (S)-9-fluoro-6-phenyl-2,6-dihydropyrido[2,1-a]isoindol-4(3H)-one**

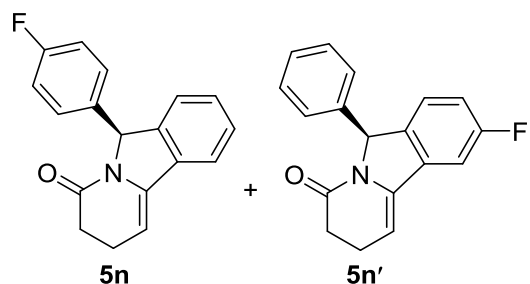

Following general procedure **GP1** (p. 27) column chromatography on phosphate-buffered silica gel delivered a mixture of **5n** and **5n'** in 90% combined yield (25.0 mg) and 1:1.3 ratio.

**Appearance:** yellow oil;  $^1\text{H}$  NMR (400 MHz,  $\text{C}_6\text{D}_6$ ): 7.25–7.17 (m, 3.7 H), 7.13–6.97 (m, 7.5 H), 6.96–6.84 (m, 2.7 H), 6.76–6.66 (m, 3.2 H), 6.60–6.54 (m, 1.3 H), 6.48–6.43 (m, 1.3 H), 5.99 (s, 1 H), 5.95 (s, 1.3 H), 5.14 (dd,  $J = 3.3, 5.8$  Hz, 1.0 H), 4.96 (dd,  $J = 3.4,$

5.8 Hz, 1.3 H), 2.34–1.74 (m, 10 H) ppm;  $^{13}\text{C}\{^1\text{H}\}$  NMR (151 MHz,  $\text{C}_6\text{D}_6$ ):  $\delta$  167.6, 167.3, 164.1, 163.51, 162.47, 142.1, 141.4, 140.8, 140.3, 140.2, 137.98, 137.96, 137.43, 137.41, 135.32, 135.26, 133.4, 129.62, 129.56, 129.3, 128.8, 128.4, 127.6, 125.91, 125.85, 124.2, 120.4, 116.7, 116.5, 115.6, 115.5, 107.1, 107.0, 95.9, 94.8, 65.3, 65.0, 31.7, 31.5, 21.02, 20.96 ppm;  $^{19}\text{F}\{^1\text{H}\}$  NMR (376 MHz,  $\text{C}_6\text{D}_6$ ):  $\delta$  -114.2, -114.7 ppm.

**Chiral HPLC** (Chiralpak IC, 4.6 x 250 mm; hexane:*i*-PrOH 90:10, 1.0 mL/min, 310 nm), **5n**:  $t_R$  (major) = 25.9 min,  $t_R$  (minor) = 46.7 min, 97.5:2.5 er; **5n'**:  $t_R$  (major) = 35.8 min,  $t_R$  (minor) = 73.6 min, 88.2:11.8 er.

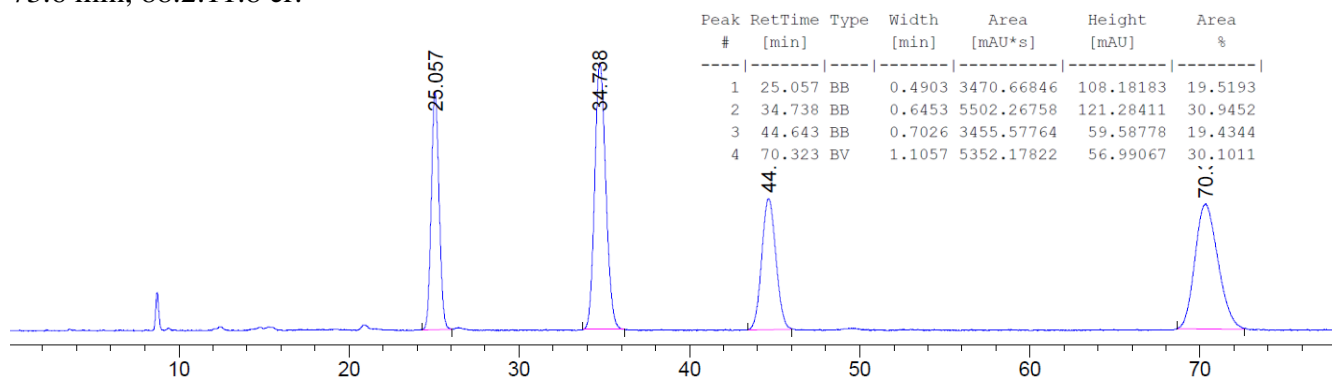

# Supporting Information

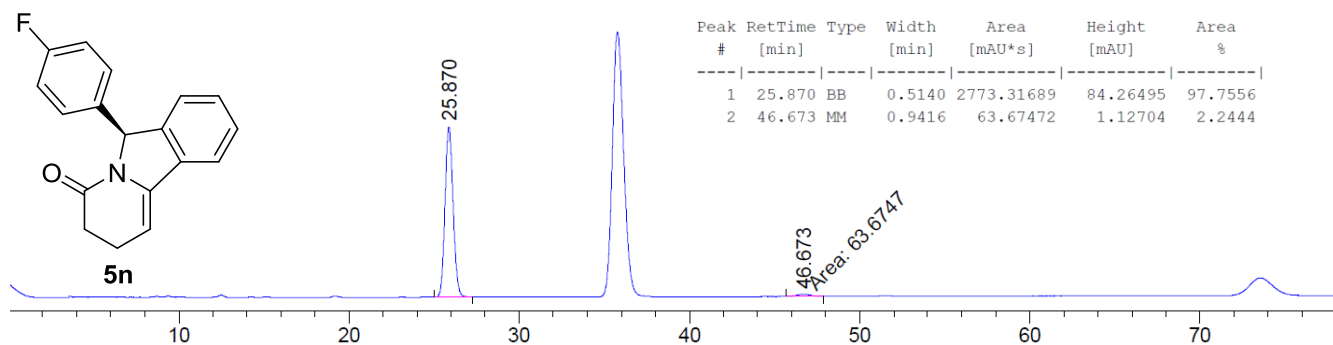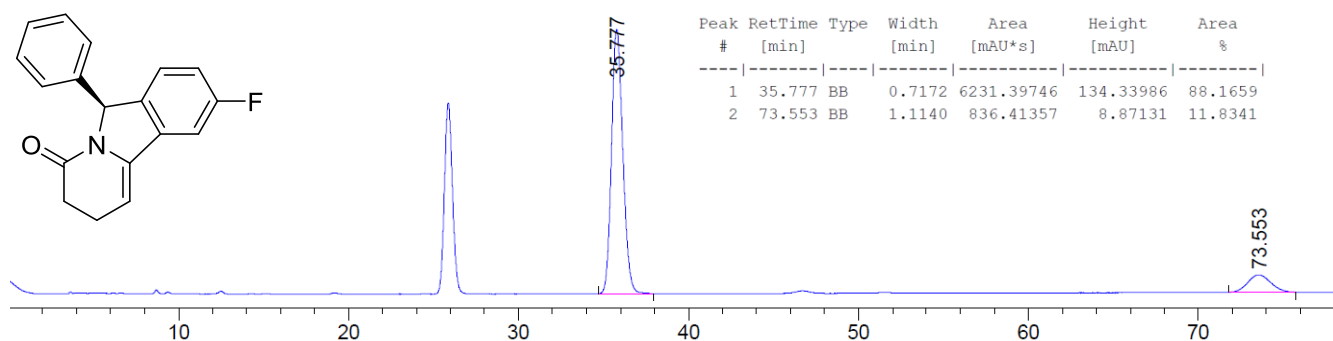



**(S)-6-phenyl-9-(trifluoromethyl)-2,6-dihydropyrido[2,1-*a*]isoindol-4(3*H*)-one and (S)-6-(4-(trifluoromethyl)phenyl)-2,6-dihydropyrido[2,1-*a*]isoindol-4(3*H*)-one**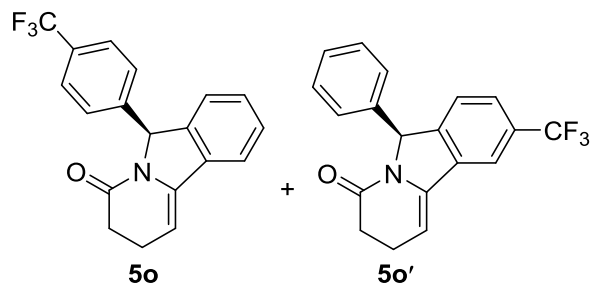

Following general procedure **GP1** (p. 27) column chromatography on phosphate-buffered silica gel delivered a mixture of **5o** and **5o'** in 96% combined yield (31.5 mg) and 1:1.1 ratio.

**Appearance:** yellow oil; a 1:2.1 mixture of **5o:5o'** was submitted to characterization: **<sup>1</sup>H NMR** (400 MHz, C<sub>6</sub>D<sub>6</sub>): 7.55–7.49 (m, 2.1 H), 7.27 (d, *J* = 8.0 Hz, 2.1 H), 7.18 (d, *J* = 7.9 Hz, 1.5 H), 7.13 (d, *J* = 1.4 Hz, 3.1 H), 7.10–7.04 (m,

8.2 H), 7.03–6.97 (m, 3.1 H), 6.89 (td, *J* = 1.3, 7.5 Hz, 1 H), 6.66–6.61 (m, 1 H), 6.55–6.48 (m, 2.1 H), 5.94 (s, 3.1 H), 5.13 (dd, *J* = 3.3, 5.9 Hz, 1 H), 4.91 (dd, *J* = 3.4, 5.9 Hz, 2.1 H), 2.35–1.70 (m, 13.3 H) ppm; **<sup>13</sup>C{<sup>1</sup>H} NMR** (151 MHz, C<sub>6</sub>D<sub>6</sub>): δ 167.5, 167.3, 145.6, 145.4, 141.5, 140.8, 140.7, 139.6, 134.1, 133.4, 131.0, 130.7, 130.5, 130.3, 130.0, 129.8, 129.4, 128.9, 128.43, 128.35, 127.6, 125.92, 125.89, 125.87, 125.84, 125.79, 125.77, 125.74, 125.72, 125.0, 124.1, 123.9, 120.5, 117.59, 117.56, 96.5, 95.0, 65.6, 65.1, 31.51, 31.46, 21.1, 20.9 ppm; **<sup>19</sup>F{<sup>1</sup>H} NMR** (376 MHz, C<sub>6</sub>D<sub>6</sub>): δ -62.0, -62.2 ppm.

**Chiral HPLC** (Chiralpak ID, 4.6 x 250 mm; hexane:*i*-PrOH 90:10, 1.0 mL/min, 290 nm), **5o**: *t*<sub>R</sub> (major) = 14.1 min, *t*<sub>R</sub> (minor) = 24.4 min, 97.3:2.7 er; **5o'**: *t*<sub>R</sub> (major) = 12.7 min, *t*<sub>R</sub> (minor) = 19.6 min, 91.9:8.1 er.

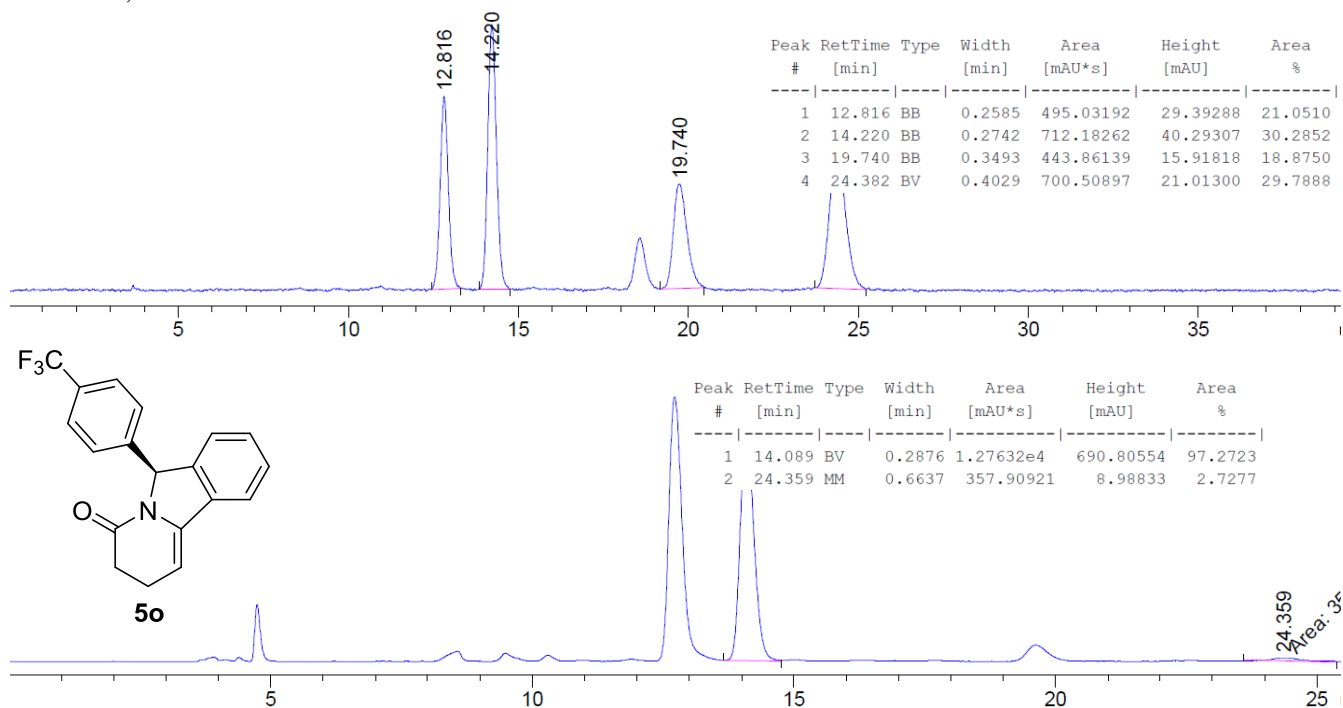

## Supporting Information

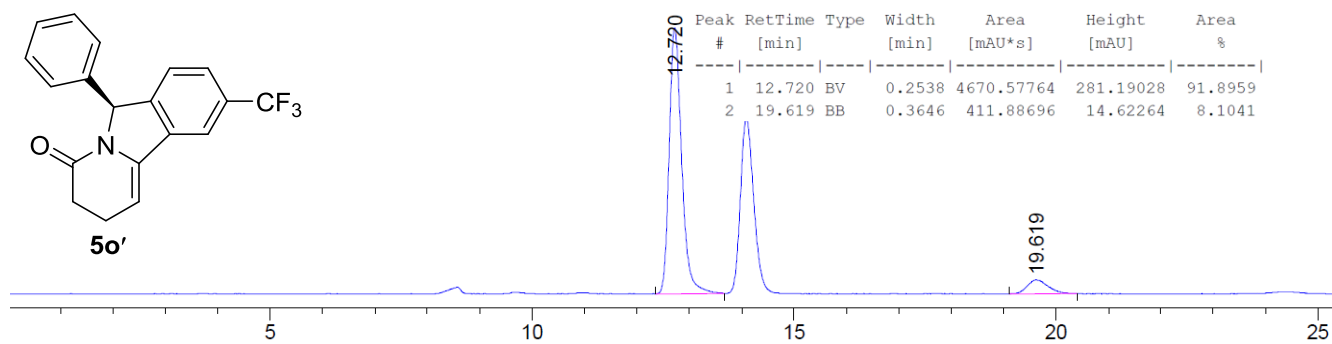

**(S)-6-(4-methoxyphenyl)-2,6-dihydropyrido[2,1-*a*]isoindol-4(3*H*)-one and (S)-9-methoxy-6-phenyl-2,6-dihydropyrido[2,1-*a*]isoindol-4(3*H*)-one**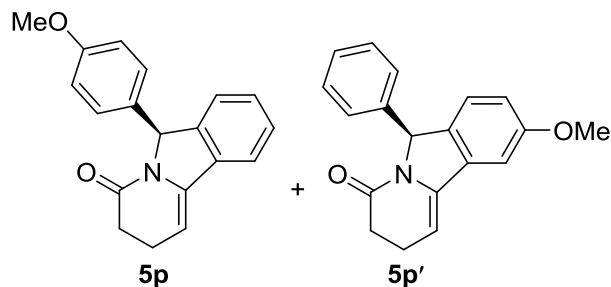

Following general procedure **GP1** (p. 27) column chromatography on phosphate-buffered silica gel delivered a mixture of **5p** and **5p'** in 93% combined yield (27.0 mg) and 1:1.1 ratio.

**Appearance:** yellow oil; a 1:1.4 mixture of **5o:5o'** was submitted to characterization <sup>1</sup>H NMR (400 MHz, C<sub>6</sub>D<sub>6</sub>): 7.35–7.30 (m, 2.9 H), 7.25–7.20 (m, 3.4 H), 7.14–7.09 (m, 3.2 H), 7.05–6.99 (m, 2.6 H), 6.98–6.91 (m, 2.6 H),

6.85–6.81 (m, 1 H), 6.74–6.59 (m, 5.1 H), 6.14 (s, 1 H), 6.11 (s, 1.4 H), 5.16 (dd, *J* = 3.4, 5.9 Hz, 1 H), 5.11 (dd, *J* = 3.4, 5.9 Hz, 1.4 H), 3.28 (s, 4.2 H), 3.22 (s, 3 H), 2.38–1.81 (m, 10 H) ppm; <sup>13</sup>C{<sup>1</sup>H} NMR (151 MHz, C<sub>6</sub>D<sub>6</sub>): δ 167.6, 167.5, 160.4, 159.7, 142.8, 142.1, 141.2, 141.0, 135.0, 134.8, 133.8, 133.5, 129.2, 129.2, 128.7, 127.8, 127.6, 125.3, 124.4, 116.5, 114.2, 104.7, 94.7, 94.6, 65.4, 55.0, 54.7, 31.8, 31.7, 21.1, 21.0 ppm.

**Chiral HPLC** (Chiralpak IG, 4.6 x 250 mm; hexane:*i*-PrOH 80:20, 1.0 mL/min, 310 nm), **5p**: *t*<sub>R</sub> (major) = 22.1 min, *t*<sub>R</sub> (minor) = 47.5 min, 97.0:3.0 er; **5p'**: *t*<sub>R</sub> (major) = 20.8 min, *t*<sub>R</sub> (minor) = 27.6 min, 92.3:7.7 er.

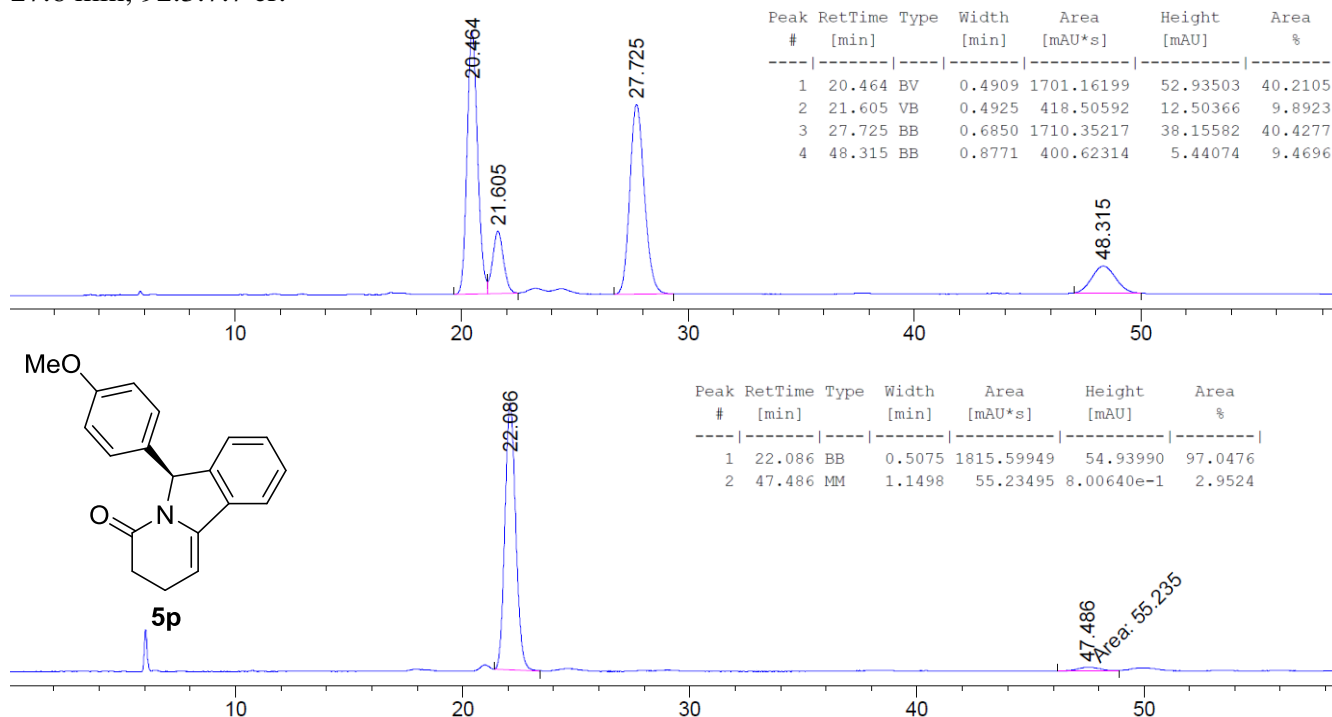

## Supporting Information

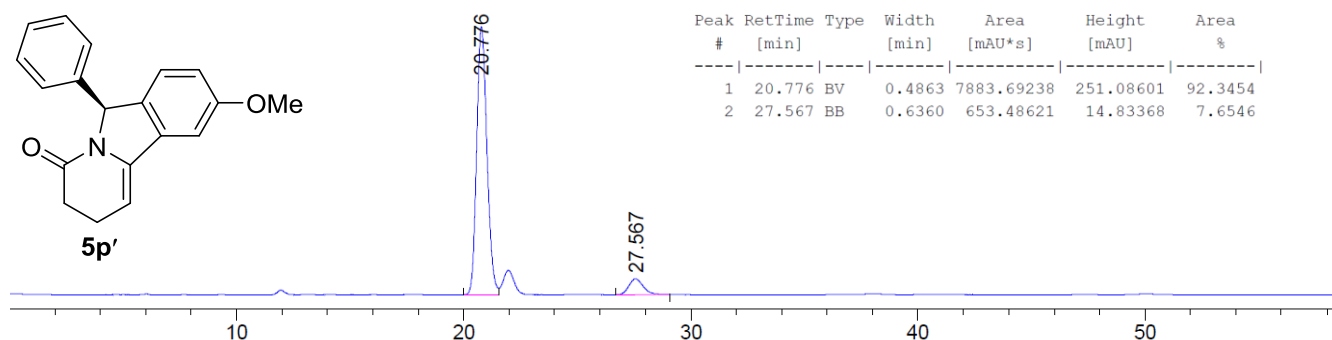

**(S)-6-(p-tolyl)-2,6-dihydropyrido[2,1-a]isoindol-4(3H)-one and (S)-9-methyl-6-phenyl-2,6-dihydropyrido[2,1-a]isoindol-4(3H)-one**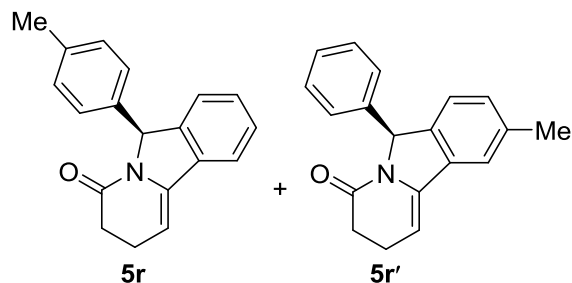

Following general procedure **GP1** (p. 27) column chromatography on phosphate-buffered silica gel delivered a mixture of **5r** and **5r'** in 94% combined yield (26.0 mg) and 1:1.1 ratio.

**Appearance:** yellow oil;  $^1\text{H}$  NMR (400 MHz,  $\text{C}_6\text{D}_6$ ): 7.34–7.28 (m, 2.1 H), 7.24–7.20 (m, 3.2 H), 7.14–7.06 (m, 3.5 H), 7.04–6.97 (m, 2.5 H), 6.97–6.89 (m, 3.3 H), 6.84–6.79 (m, 1.1 H), 6.77–6.66 (m, 2.2 H), 6.13 (s, 2.1 H), 5.20 (dd,  $J = 3.3, 5.8$

Hz, 1.1 H), 5.16 (dd,  $J = 3.4, 5.9$  Hz, 1 H), 2.36–1.84 (m, 16.9 H) ppm;  $^{13}\text{C}\{^1\text{H}\}$  NMR (151 MHz,  $\text{C}_6\text{D}_6$ ):  $\delta$  167.54, 167.50, 142.7, 142.0, 141.20, 141.1, 139.9, 138.9, 137.8, 137.3, 133.6, 133.5, 130.4, 129.5, 129.2, 128.7, 128.4, 127.7, 124.4, 124.1, 120.7, 120.4, 94.5, 94.3, 65.69, 65.66, 31.8, 21.3, 21.08, 21.06 ppm.

**Chiral HPLC** (Chiralpak ID, 4.6 x 250 mm; hexane:*i*-PrOH 80:20, 1.0 mL/min, 314 nm), **5r**:  $t_R$  (major) = 12.8 min,  $t_R$  (minor) = 19.6 min, 95.2:4.8 er; **5p'**:  $t_R$  (major) = 13.8 min,  $t_R$  (minor) = 17.5 min, 94.4:5.6 er.

| Peak # | RetTime [min] | Type | Width [min] | Area [mAU*s] | Height [mAU] | Area %  |
|--------|---------------|------|-------------|--------------|--------------|---------|
| 1      | 12.868        | BB   | 0.2636      | 133.43996    | 7.87769      | 20.7834 |
| 2      | 13.809        | BB   | 0.2815      | 190.80620    | 10.32801     | 29.7183 |
| 3      | 17.478        | BB   | 0.4391      | 186.24312    | 5.44464      | 29.0075 |
| 4      | 19.604        | BB   | 0.3875      | 131.56125    | 4.77410      | 20.4908 |

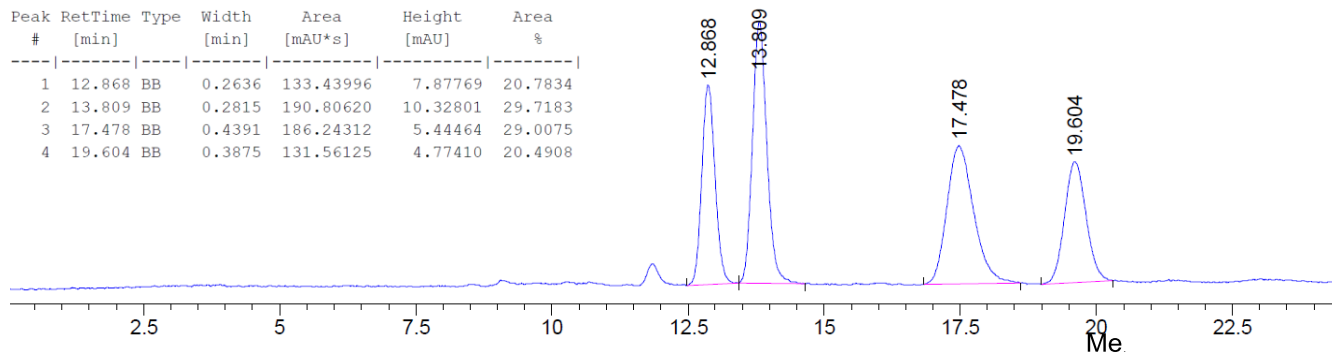

| Peak # | RetTime [min] | Type | Width [min] | Area [mAU*s] | Height [mAU] | Area %  |
|--------|---------------|------|-------------|--------------|--------------|---------|
| 1      | 12.836        | BV   | 0.2632      | 756.84247    | 44.76580     | 95.2114 |
| 2      | 19.581        | MM   | 0.5151      | 38.06458     | 1.23165      | 4.7886  |

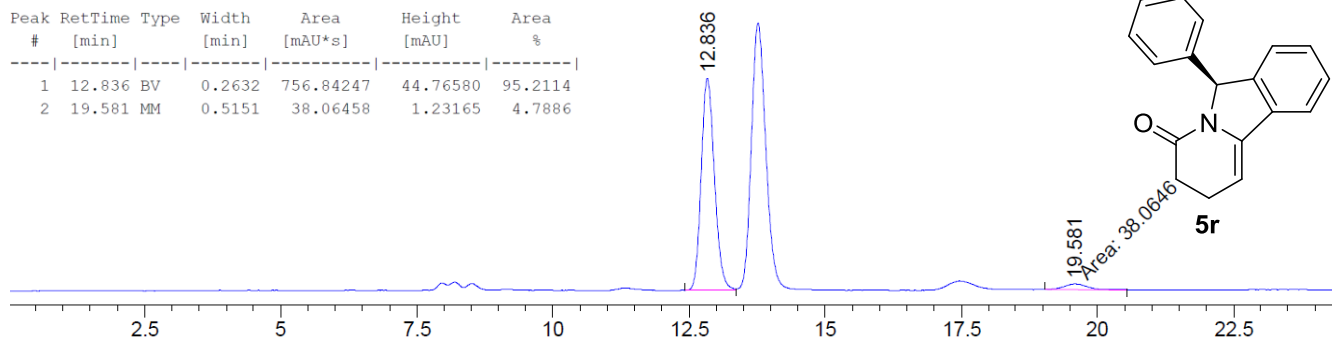

## Supporting Information

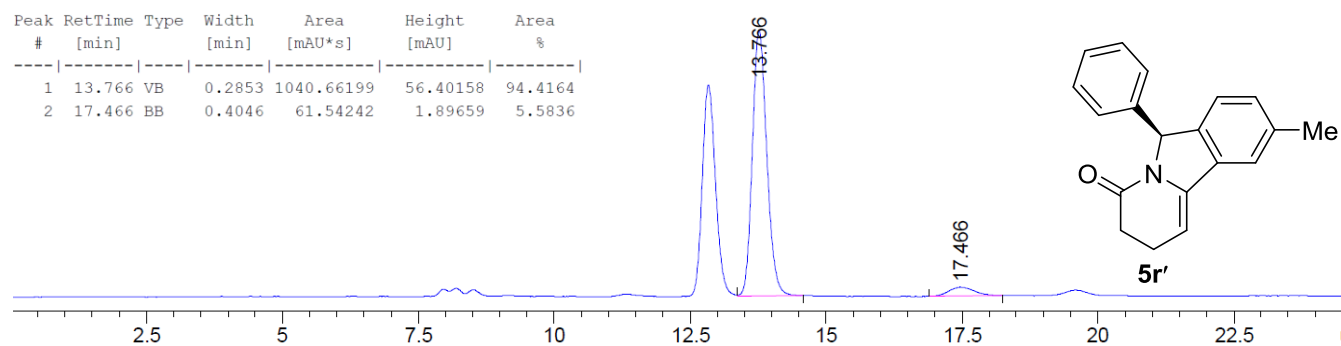

## Synthetic transformations of product 5a

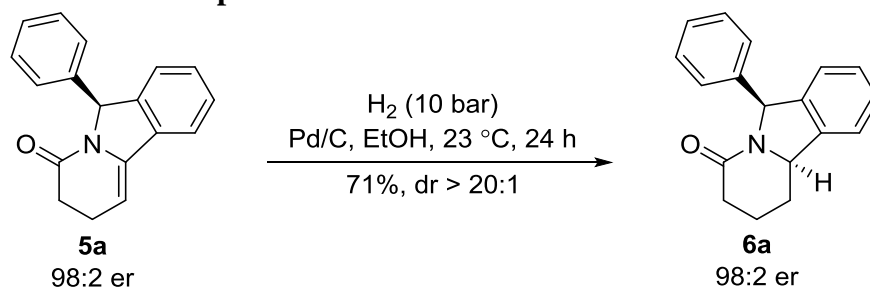

To a 5 mL microwave vial equipped with a stir bar and open to air were added (*S*)-6-phenyl-2,6-dihydropyrido[2,1-*a*]isoindol-4(3*H*)-one (**5a**) (39.0 mg, 150  $\mu\text{mol}$ , 1.0 eq) and Pd/C 10%wt (16.0 mg, 15.0  $\mu\text{mol}$ , 10 mol%). The tube was placed in an autoclave and the reaction mixture was kept stirring under pressure of  $\text{H}_2$  (10 bar) for 24 h at 23 °C. The mixture was filtered through celite (eluting with EtOAc) and concentrated under reduced pressure. Purification by silica gel chromatography (pentane:EtOAc, 1:1  $\rightarrow$  pure EtOAc) afforded (*6S*,10*bR*)-6-phenyl-2,3,6,10*b*-tetrahydropyrido[2,1-*a*]isoindol-4(1*H*)-one (28.0 mg, 106  $\mu\text{mol}$ , 71%) as a white solid. **R<sub>f</sub>**: 0.3 (EtOAc); **m.p.**: 125.1–126.7 °C; **<sup>1</sup>H NMR** (400 MHz,  $\text{C}_6\text{D}_6$ ):  $\delta$  7.28–7.20 (m, 2 H), 7.18–7.12 (m, 2 H), 7.11–6.99 (m, 2 H), 6.95–6.82 (m, 2 H), 6.75–6.70 (m, 1 H), 5.93 (s, 1 H), 4.29–4.18 (m, 1 H), 2.14–1.94 (m, 2 H), 1.87–1.71 (m, 1 H), 1.48–1.22 (m, 3 H) ppm; **<sup>13</sup>C{<sup>1</sup>H} NMR** (101 MHz,  $\text{C}_6\text{D}_6$ ):  $\delta$  168.6, 143.0, 142.0, 140.0, 128.5 (2 C), 128.2, 127.9 (2 C), 127.4, 124.7, 121.6, 67.0, 62.3, 32.0, 29.0, 20.2 ppm; **IR** (ATR):  $\nu_{\text{max}}$  = 3389, 3055, 3029, 2948, 2870, 1650, 1589, 1461, 1407, 1325, 1261, 1200, 1144, 1099, 1073, 1055, 1028, 932, 800, 747, 698  $\text{cm}^{-1}$ ; **HRMS** (Multimode): calculated for  $[\text{C}_{18}\text{H}_{17}\text{NO} + \text{H}]^+$ : 264.1383, found: 264.1377;  **$[\alpha]_{\text{D}}^{20}$** : 5.8 (*c* = 1.0,  $\text{CHCl}_3$ ).

**Chiral HPLC** (Chiralpak IF, 4.6 x 250 mm; hexane:*i*-PrOH 80:20, 1.0 mL/min, 208 nm):  $t_{\text{R}}$  (major) = 16.2 min,  $t_{\text{R}}$  (minor) = 21.2 min, 97.9:2.1 er.

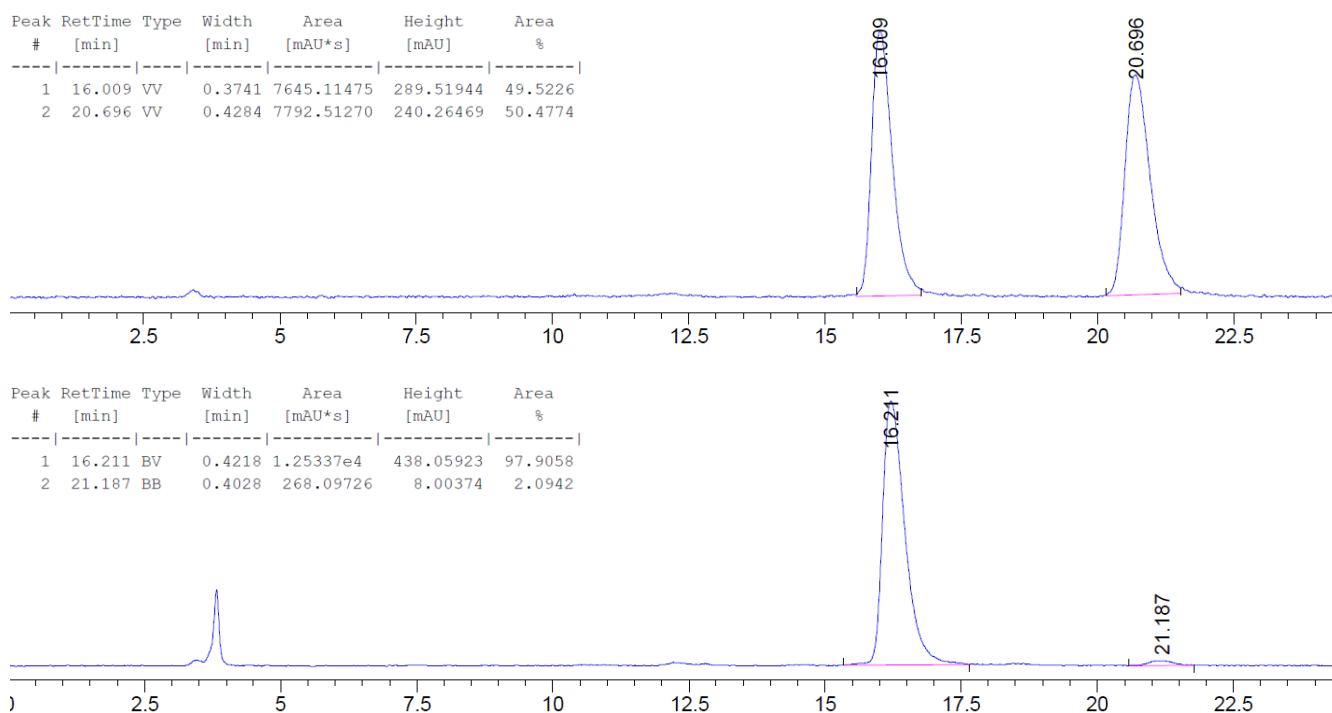

Determination of stereoconfiguration of **6a** by 1D NOE spectroscopy

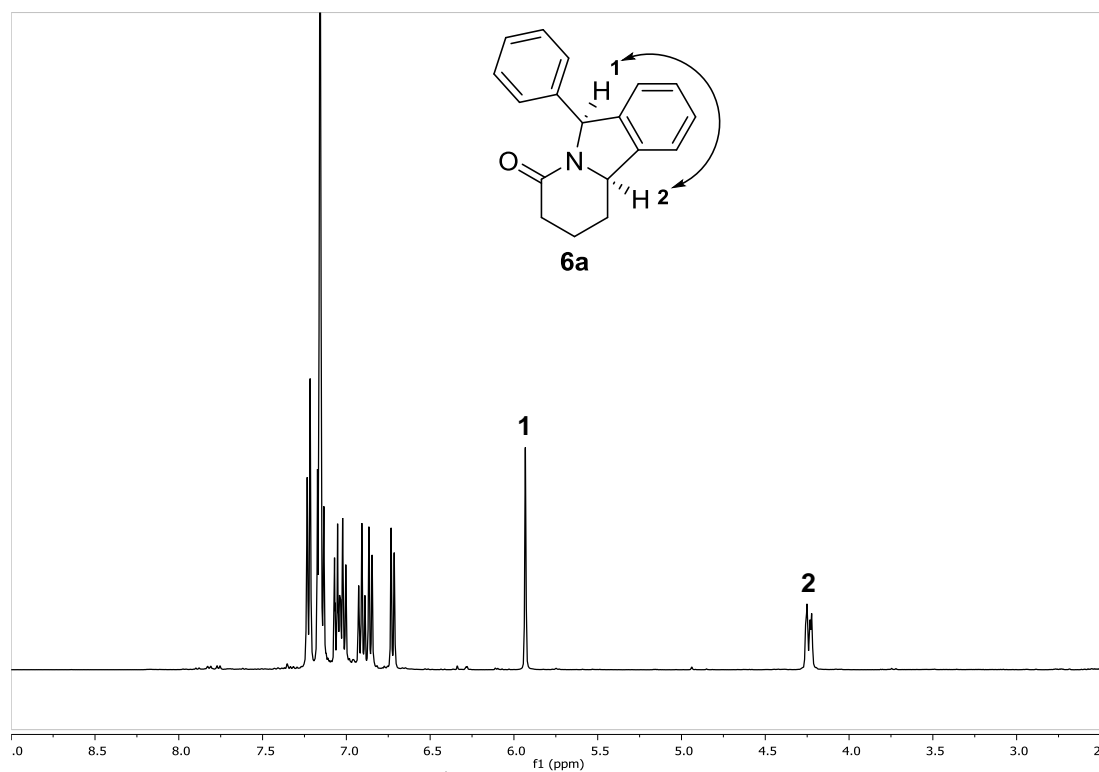

9.0–2.5 ppm fragment of  $^1\text{H}$  NMR spectrum ( $\text{C}_6\text{D}_6$ , 400 MHz) of **6a**.

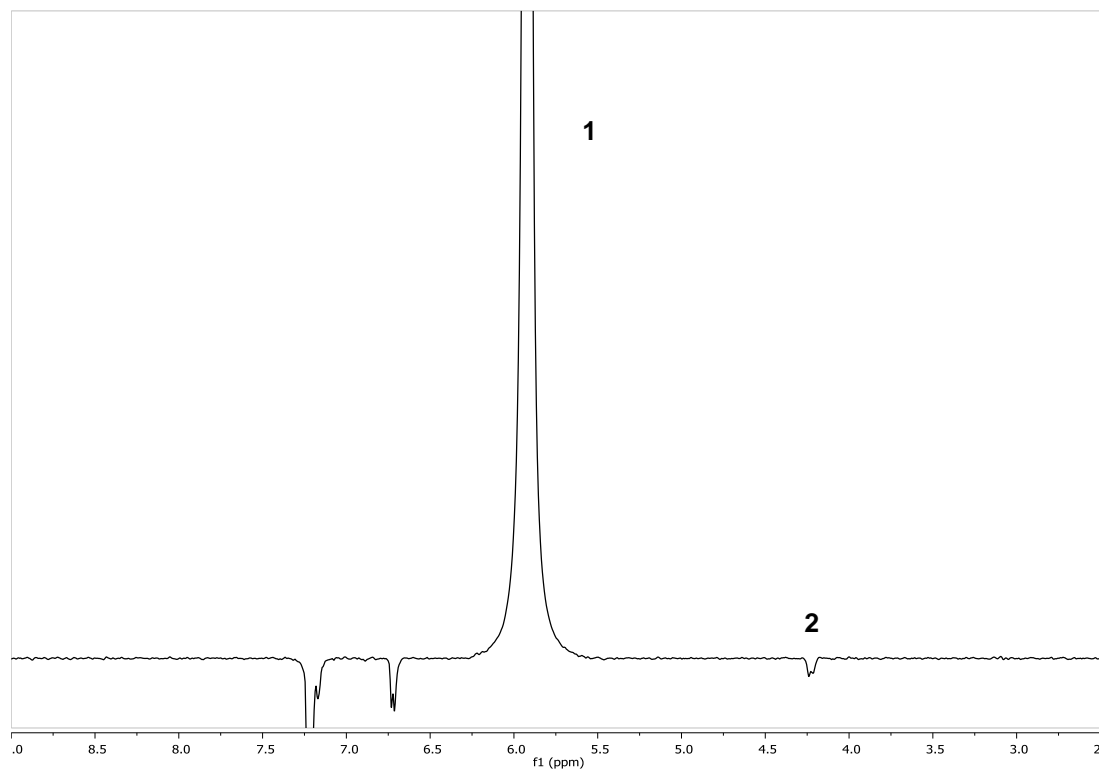

1D NOE spectrum of **6a**, irradiation at the frequency of H-1.



## Supporting Information

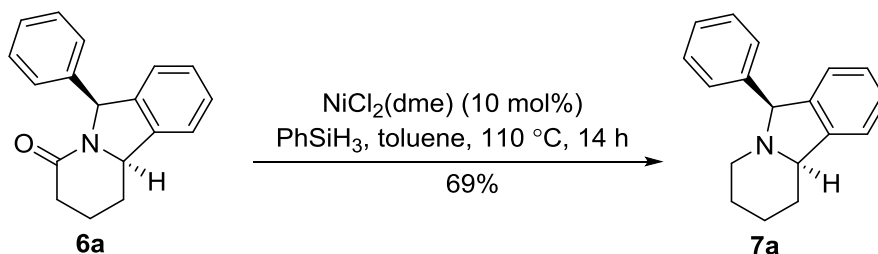

Prepared according to a slight modification of the procedure reported by Garg.<sup>3</sup> A 0.2–0.5 mL microwave vial equipped with a stir bar was charged with (6*S*,10*bR*)-6-phenyl-2,3,6,10*b*-tetrahydropyrido[2,1-*a*]isoindol-4(1*H*)-one (**6a**) (12.0 mg, 46.0  $\mu\text{mol}$ , 1.0 eq) and  $\text{NiCl}_2(\text{dme})$  (1.0 mg, 4.56  $\mu\text{mol}$ , 10 mol%), and the vial was flushed with  $\text{N}_2$ .  $\text{PhSiH}_3$  (11  $\mu\text{L}$ , 91.0  $\mu\text{mol}$ , 2 eq) was added under a  $\text{N}_2$  atmosphere followed by toluene (90  $\mu\text{L}$ , 0.5 M). The vial was sealed, placed in a pre-heated aluminum block and allowed to stir at 110  $^\circ\text{C}$  for 24 h. After cooling to room temperature, the reaction mixture was filtered through celite and concentrated under reduced pressure. Purification by silica gel chromatography (pentane:EtOAc, 4:1) afforded (6*S*,10*bR*)-6-phenyl-1,2,3,4,6,10*b*-hexahydropyrido[2,1-*a*]isoindole (8.0 mg, 32.0  $\mu\text{mol}$ , 70%) as colorless oil along with an unidentified impurity. **R<sub>f</sub>**: 0.2 (pentane:EtOAc, 4:1); **<sup>1</sup>H NMR** (400 MHz,  $\text{C}_6\text{D}_6$ ):  $\delta$  7.43–7.39 (m, 2 H), 7.23–7.19 (m, 2 H), 7.11–7.05 (m, 3 H), 7.00–6.96 (m, 1 H), 6.81–6.77 (m, 1 H), 4.38 (d,  $J = 3.4$  Hz, 1 H), 3.31–3.26 (m, 1 H), 2.89–2.83 (m, 1H), 2.28–2.17 (m, 1 H), 2.11–2.02 (m, 1 H), 1.75–1.70 (m, 1 H), 1.67–1.60 (m, 1H), 1.55–1.46 (m, 1 H), 1.42–1.37 (m, 1 H), 1.30–1.21 (m, 1 H) ppm; **<sup>13</sup>C{<sup>1</sup>H} NMR** (100 MHz,  $\text{C}_6\text{D}_6$ ):  $\delta$  145.0, 143.5, 141.7, 135.7, 128.9 (2 C), 128.3, 128.1, 126.7, 126.6, 122.8, 120.0, 72.3, 66.9, 48.7, 29.1, 26.0, 24.5 ppm; **IR** (ATR):  $\nu_{\text{max}} = 3025, 2932, 2851, 2775, 2737, 2702, 2171, 2148, 1955, 1601, 1457, 1377, 1350, 1300, 1283, 1248, 1124, 1081, 1027, 842, 739, 699 \text{ cm}^{-1}$ ; **HRMS** (Multimode): calculated for  $[\text{C}_{18}\text{H}_{19}\text{NO} + \text{H}]^{+}$ : 250.1590, found: 250.1575; **[ $\alpha$ ]<sub>D</sub><sup>20</sup>**: 32 (c = 0.6,  $\text{CHCl}_3$ ).

**References**

1. Hamada, T.; Chieffi, A.; Åhman, J.; Buchwald, S. L., *J. Am. Chem. Soc.* **2002**, *124*, 1261–1268.
2. Donets, P. A.; Cramer, N., *J. Am. Chem. Soc.* **2013**, *135*, 11772–11775.
3. Simmons, B. J.; Hoffmann, M.; Hwang, J.; Jackl, M. K.; Garg, N. K., *Org. Lett.* **2017**, *19*, 1910–1913.

## NMR Spectra

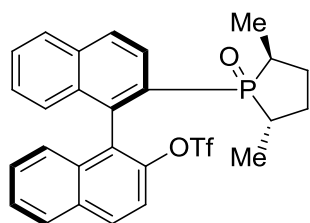**S1** $^1\text{H}$  NMR, 400 MHz,  $\text{CDCl}_3$ 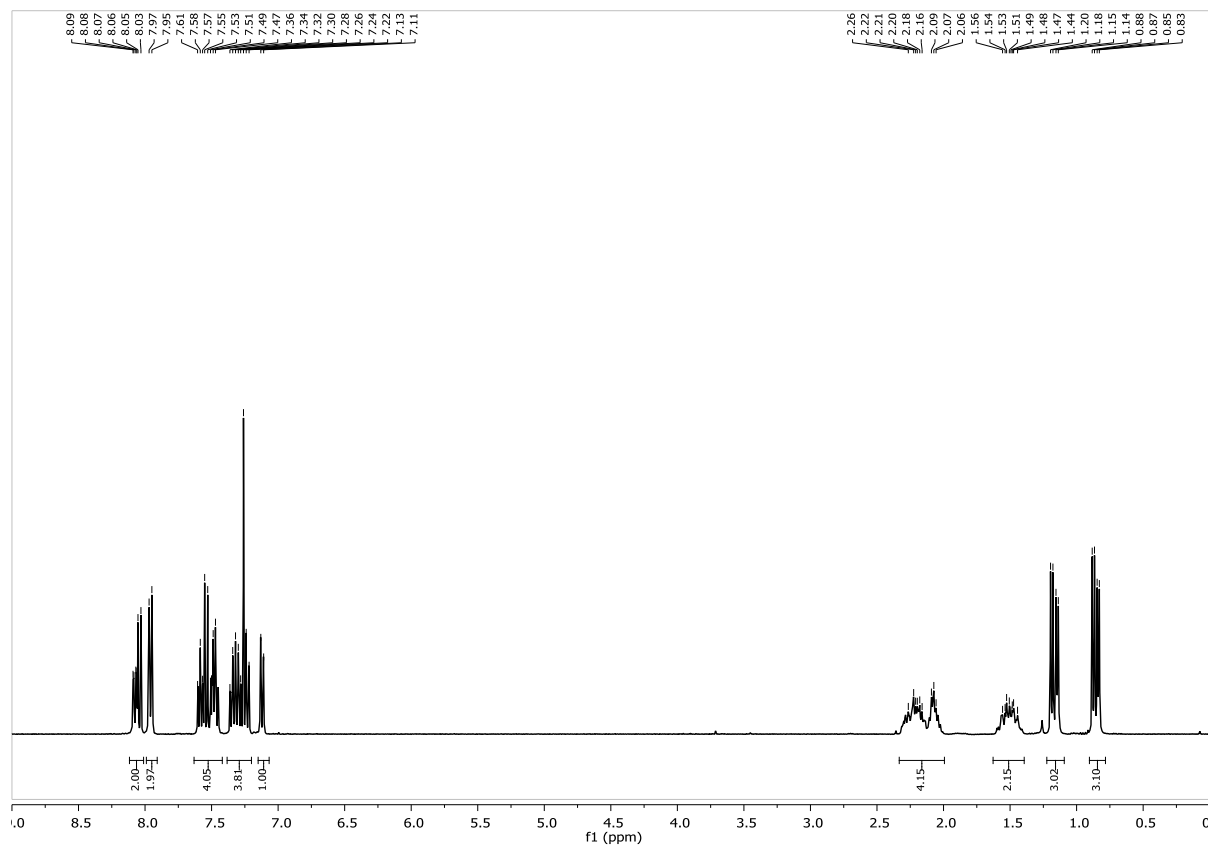

# Supporting Information

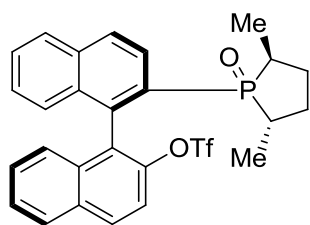

**S1**

$^{13}\text{C}\{^1\text{H}\}$  NMR, 101 MHz,  $\text{CDCl}_3$

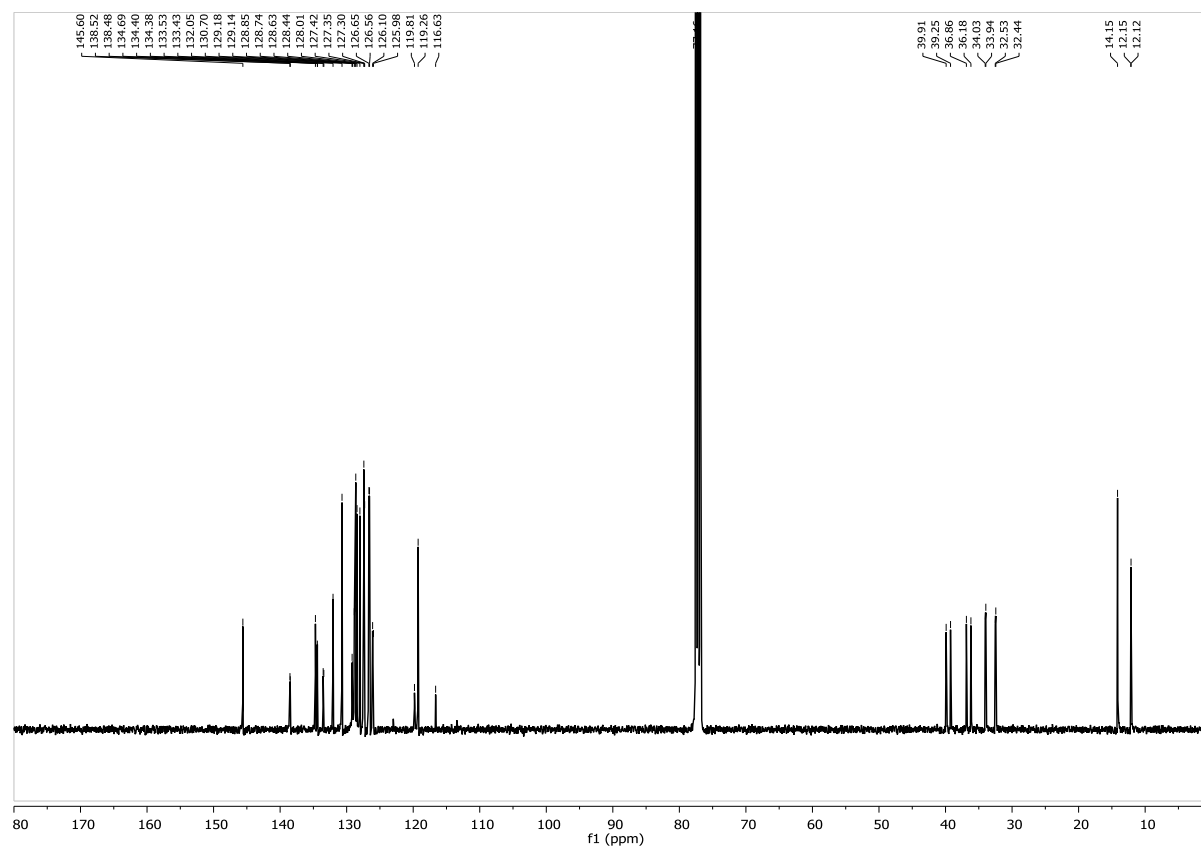

Supporting Information



**S1**

$^{19}\text{F}\{^1\text{H}\}$  NMR, 376 MHz,  $\text{CDCl}_3$

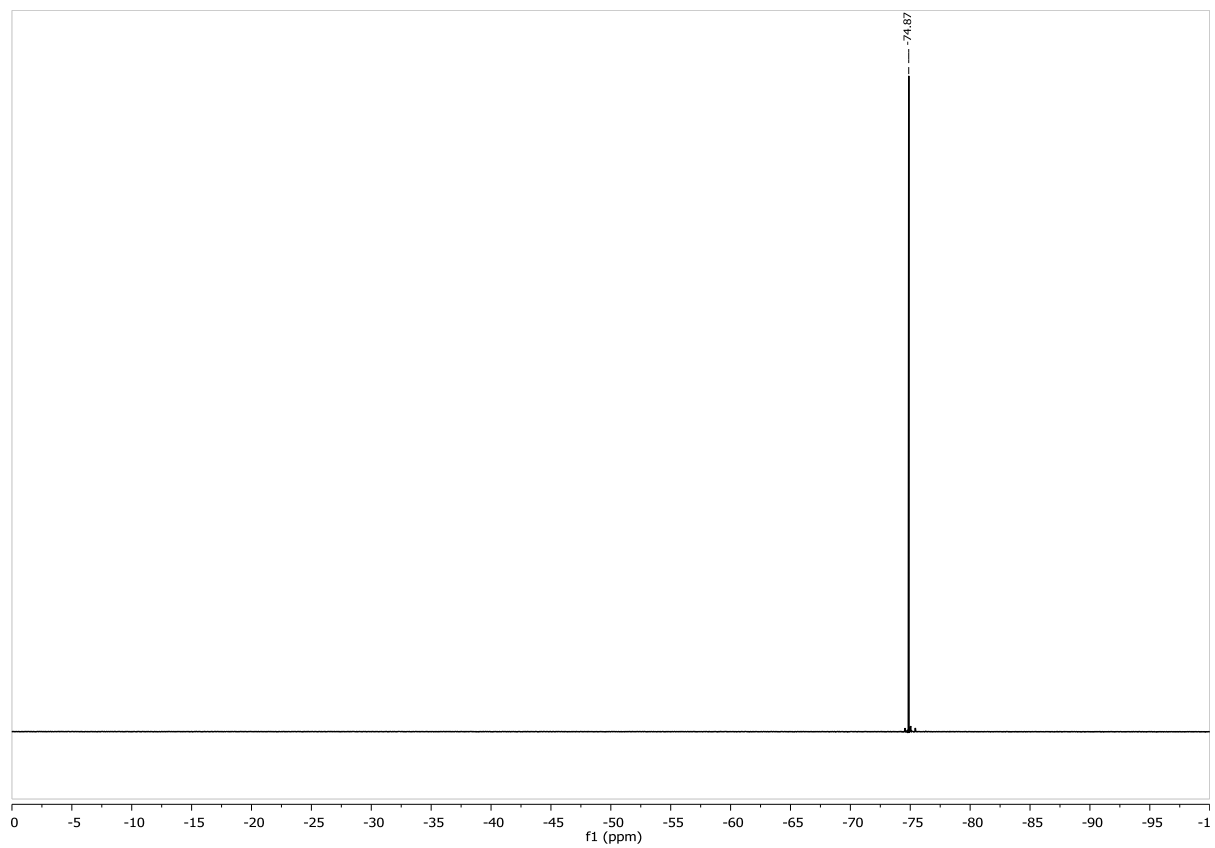

Supporting Information

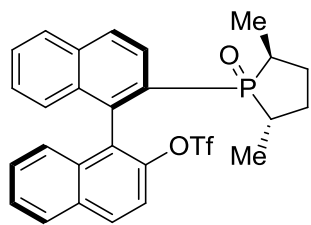

**S1**

$^{31}\text{P}\{^1\text{H}\}$  NMR, 162 MHz,  $\text{CDCl}_3$

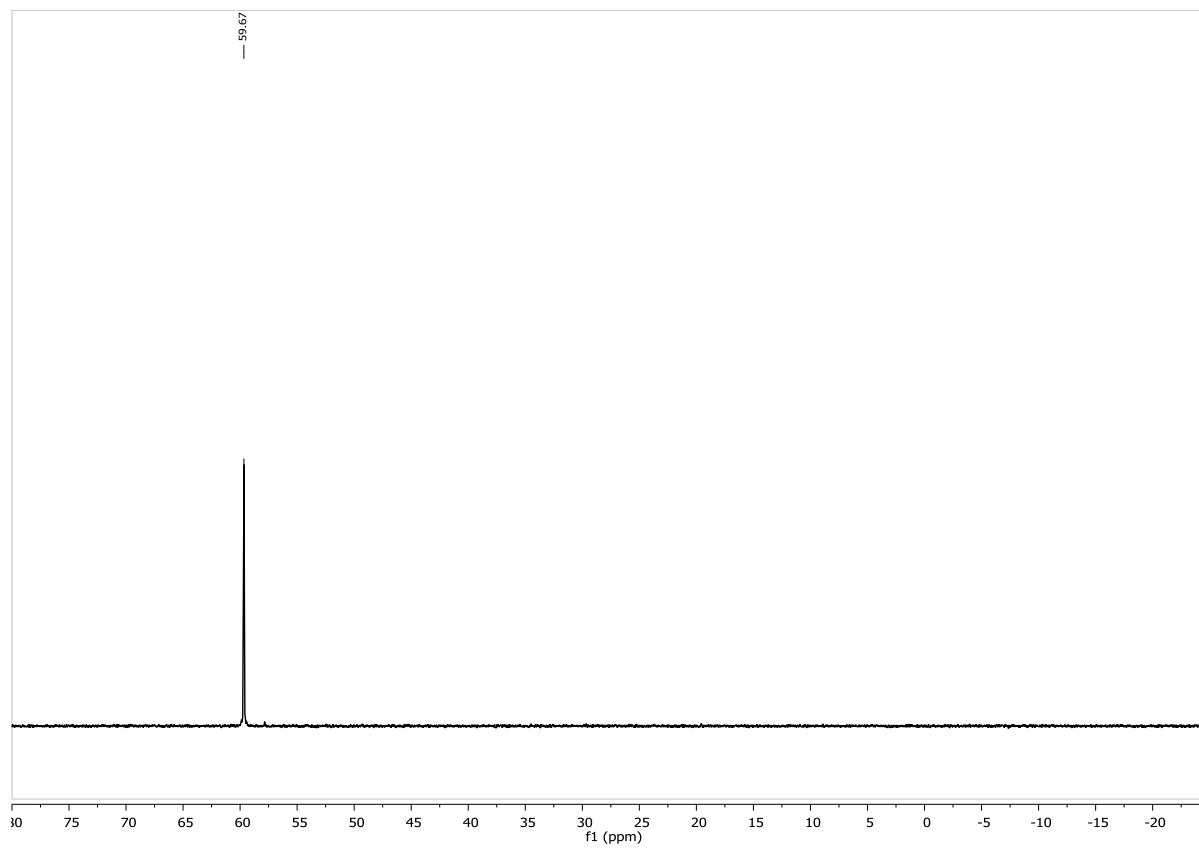

# Supporting Information

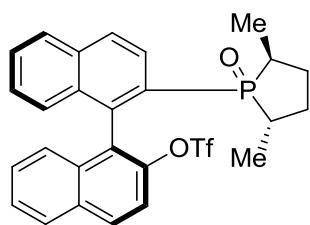

**S2**

$^1\text{H}$  NMR, 400 MHz,  $\text{C}_6\text{D}_6$

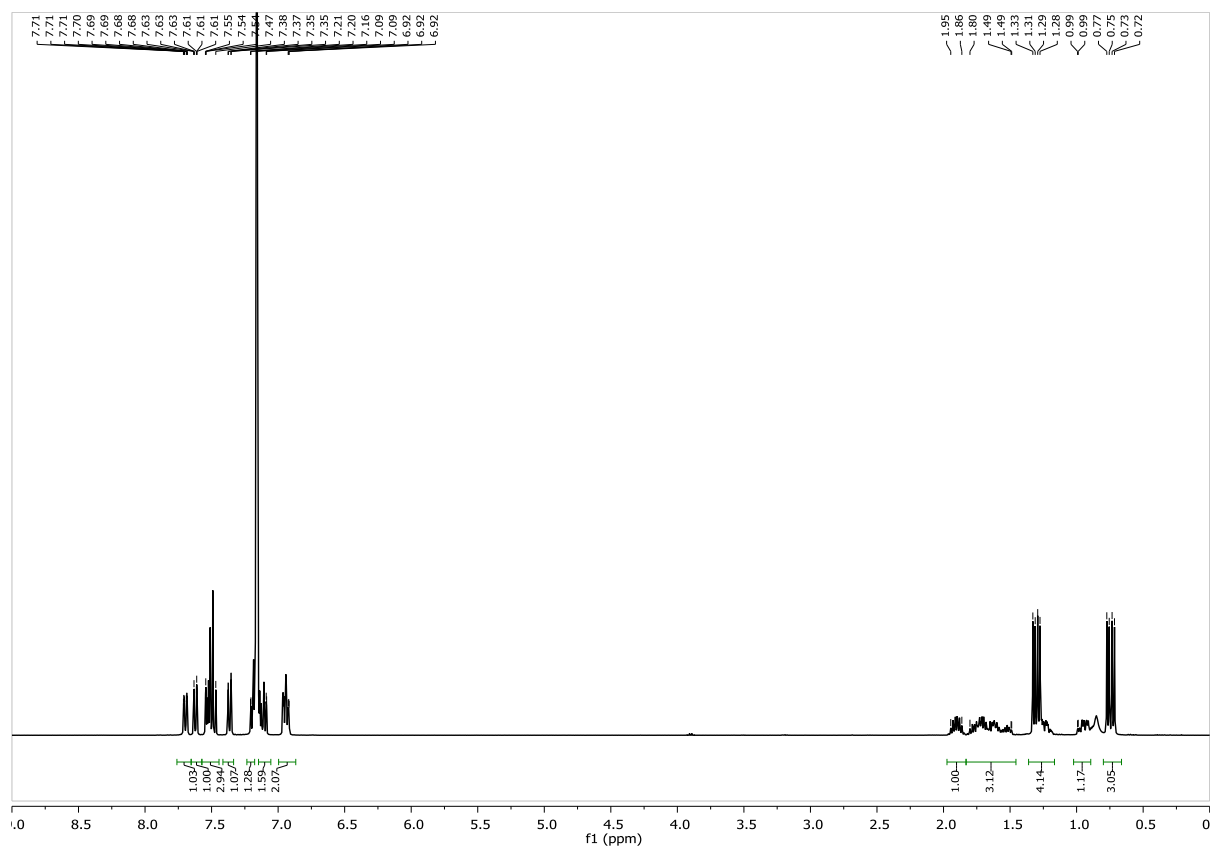

# Supporting Information

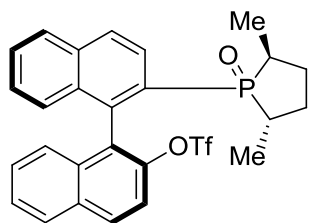

**S2**

$^{13}\text{C}\{^1\text{H}\}$  NMR, 101 MHz,  $\text{C}_6\text{D}_6$

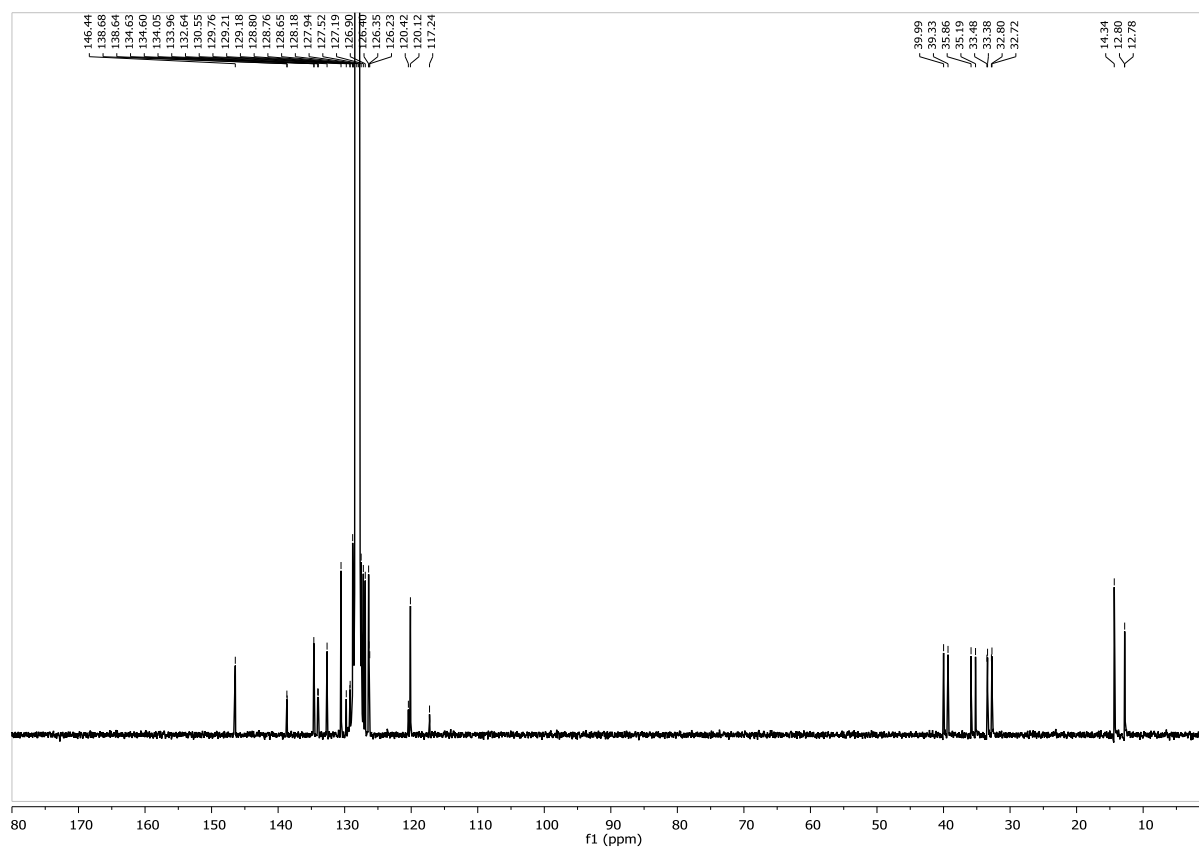



*Supporting Information*



**S2**

$^{19}\text{F}\{^1\text{H}\}$  NMR, 376 MHz,  $\text{C}_6\text{D}_6$

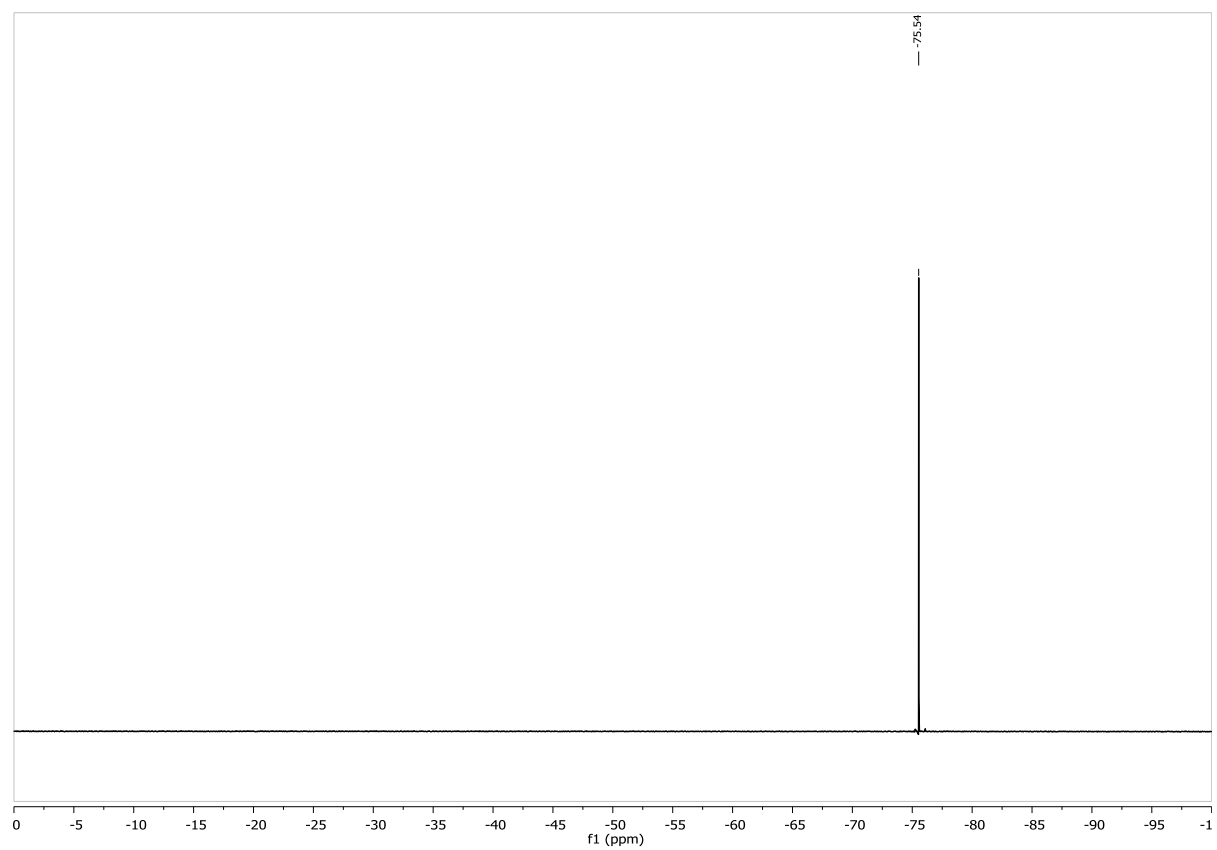

*Supporting Information*

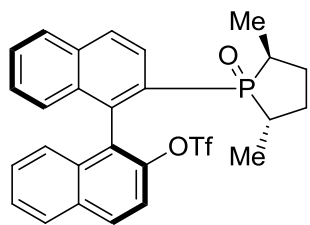

**S2**

$^{31}\text{P}\{^1\text{H}\}$  NMR, 162 MHz,  $\text{C}_6\text{D}_6$

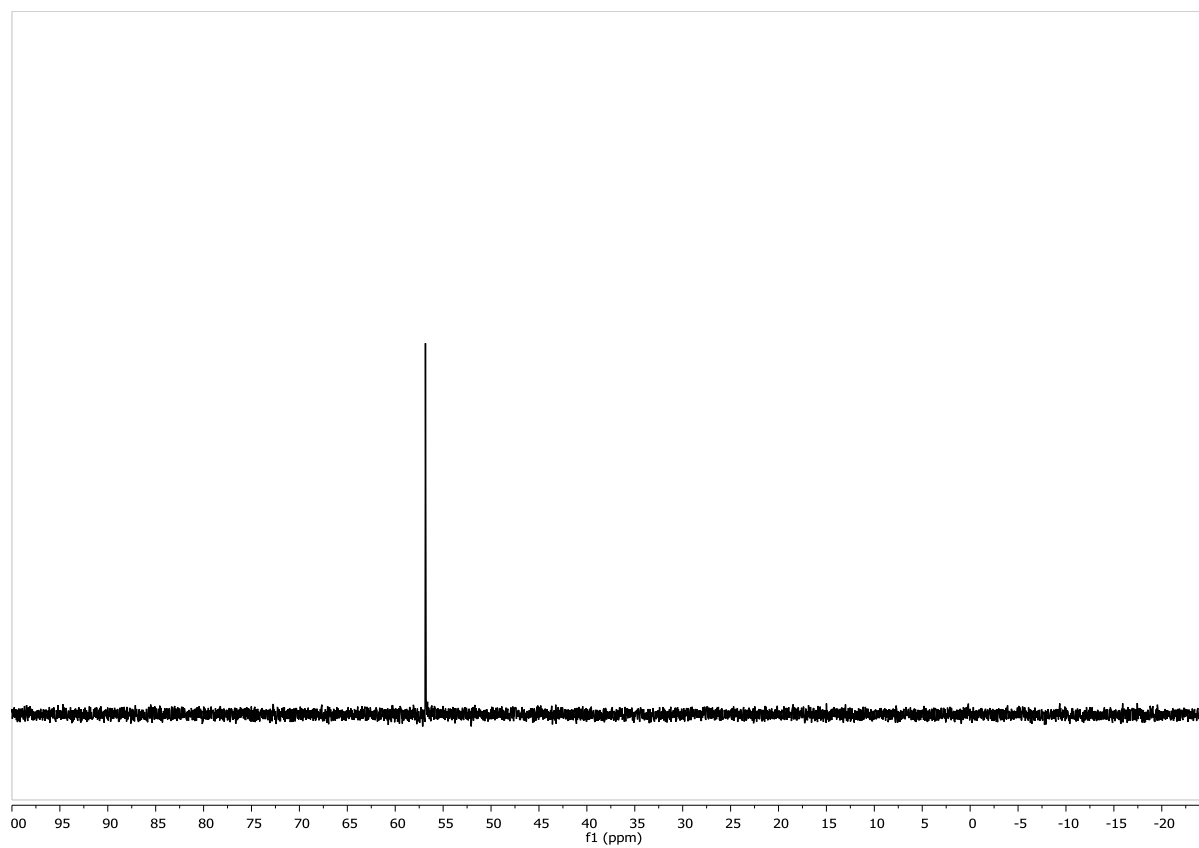

# Supporting Information

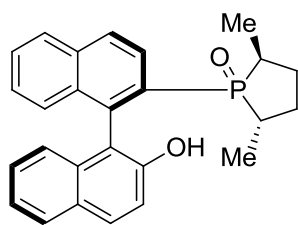

**S3**

$^1\text{H}$  NMR, 400 MHz,  $\text{CD}_3\text{CN}$

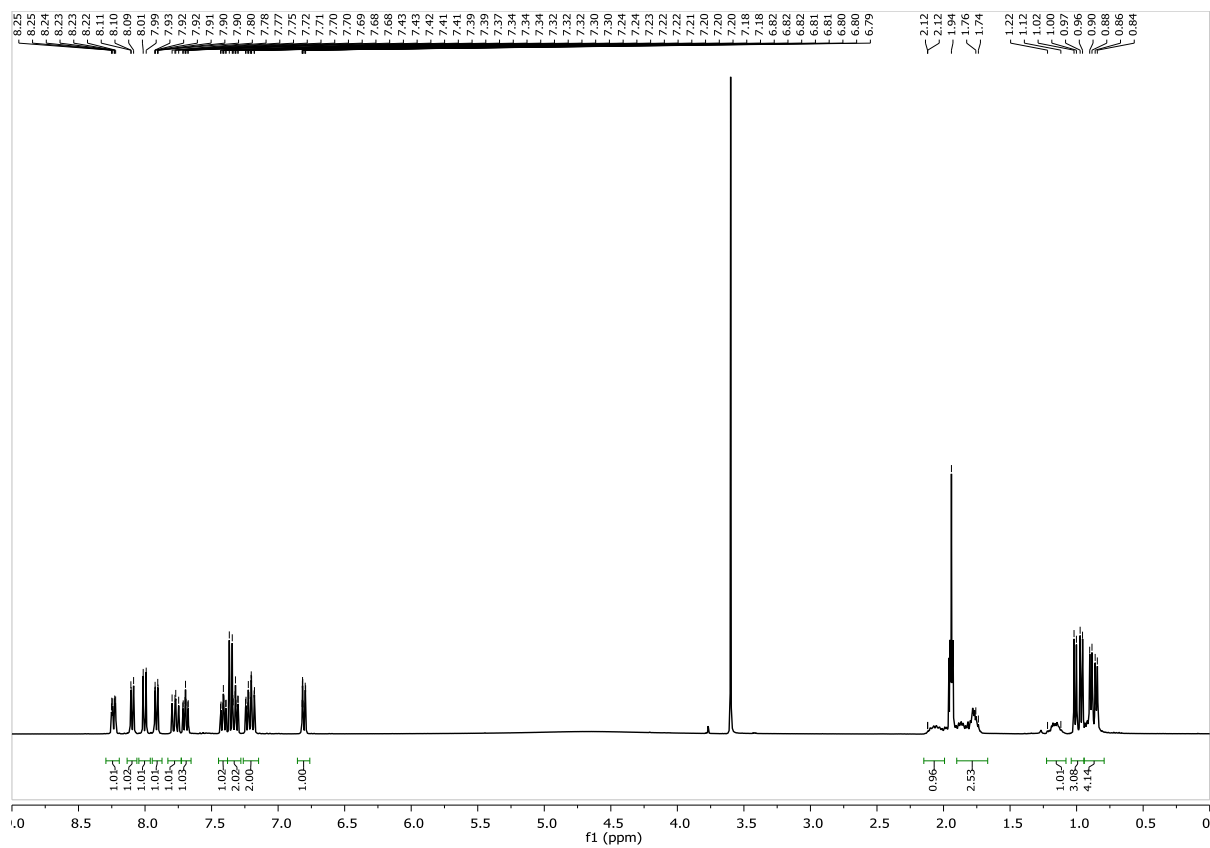

# Supporting Information



**S3**

$^{13}\text{C}\{^1\text{H}\}$  NMR, 101 MHz,  $\text{CD}_3\text{CN}$

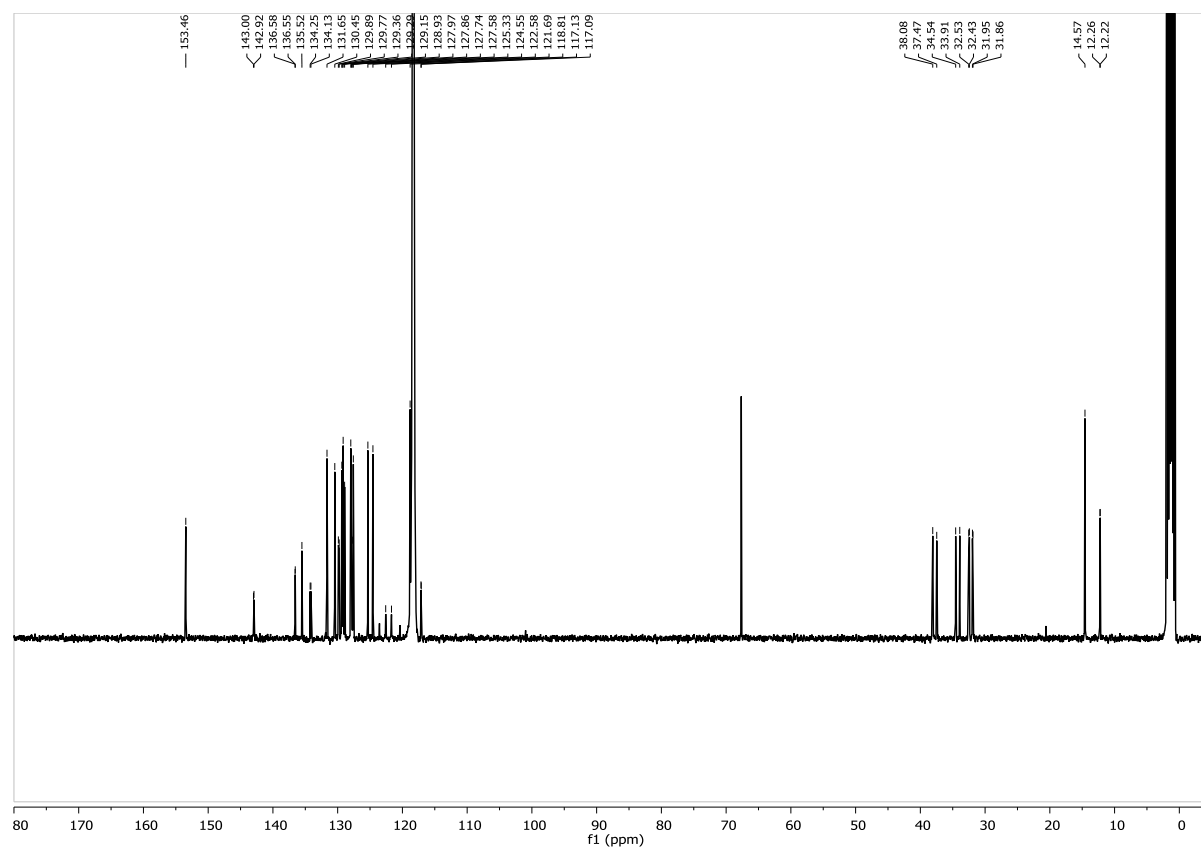

*Supporting Information*



**S3**

$^{31}\text{P}\{^1\text{H}\}$  NMR, 162 MHz,  $\text{CD}_3\text{CN}$

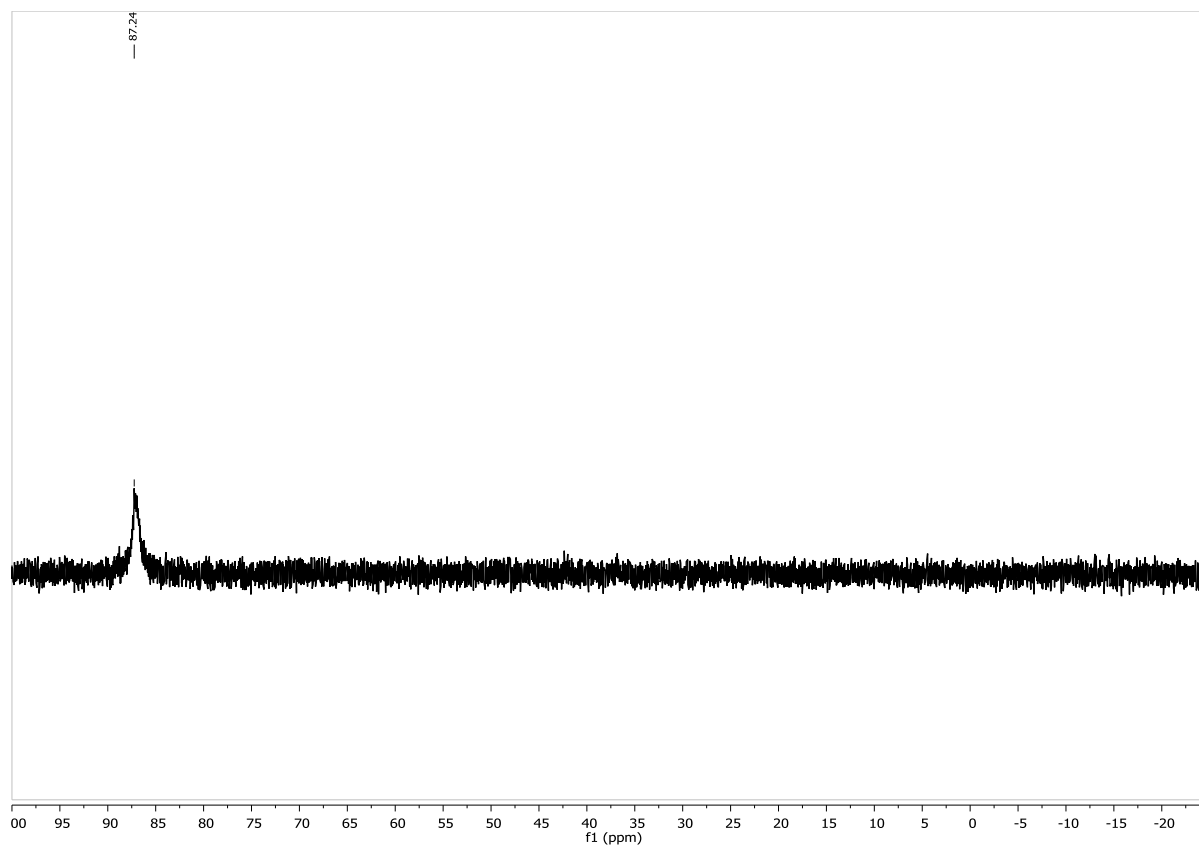

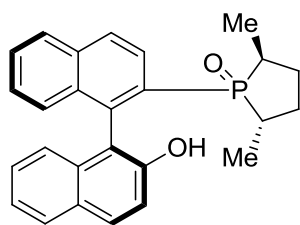**S4** $^1\text{H}$  NMR, 400 MHz,  $\text{CD}_3\text{CN}$ 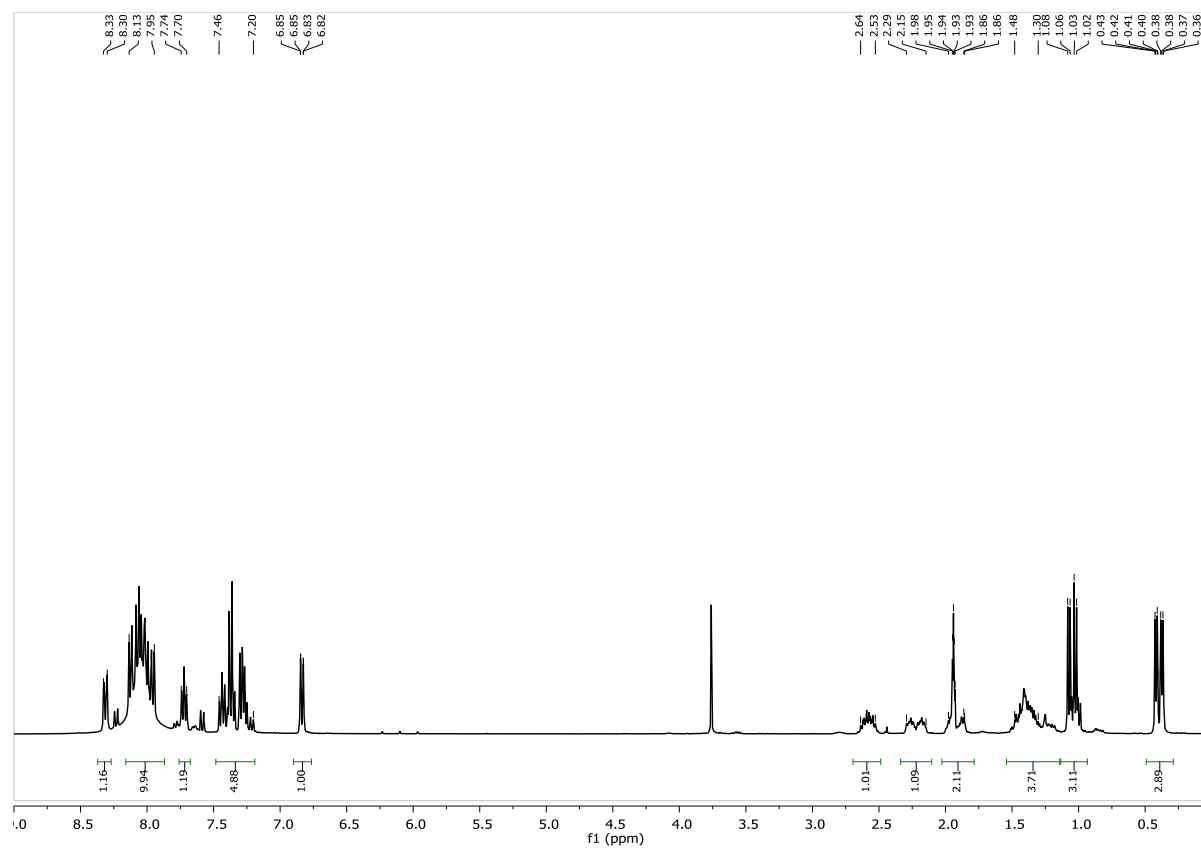

*Supporting Information*



**S4**

$^{31}\text{P}\{^1\text{H}\}$  NMR, 162 MHz,  $\text{CD}_3\text{CN}$

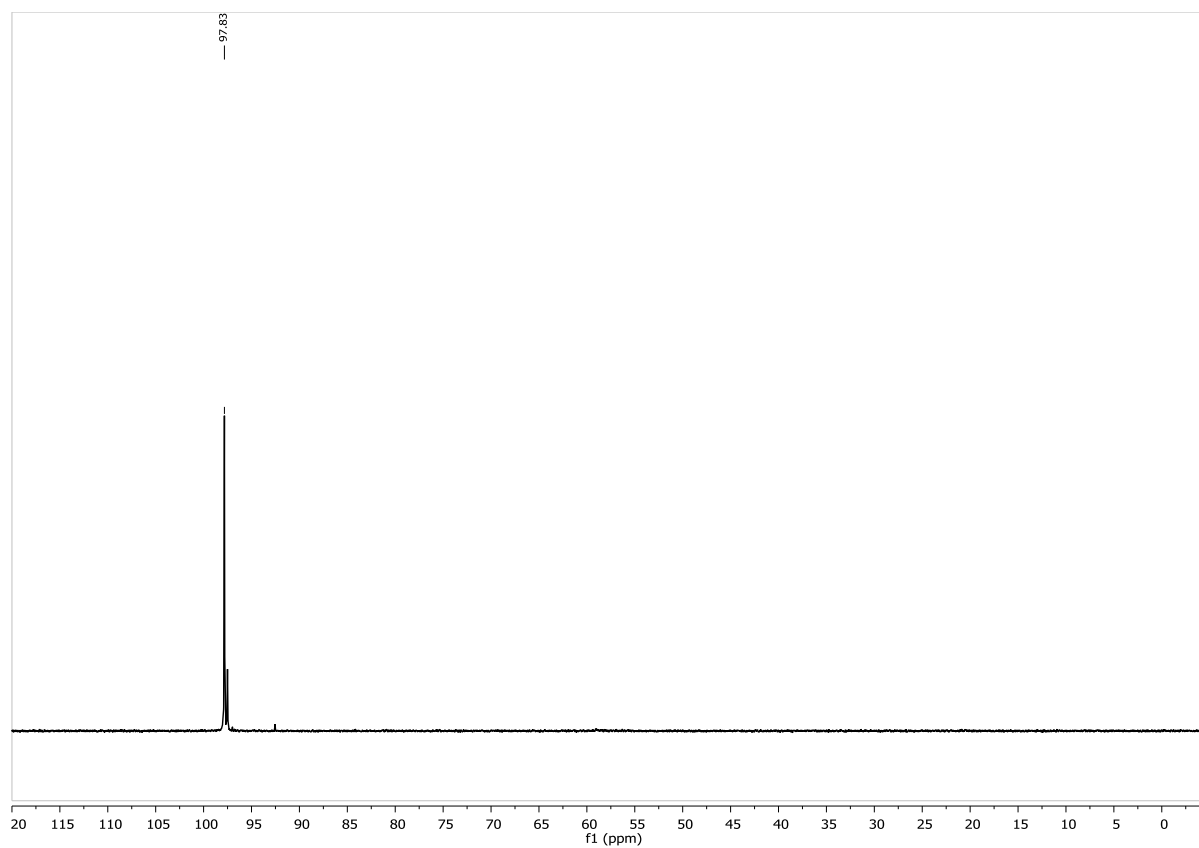

# Supporting Information

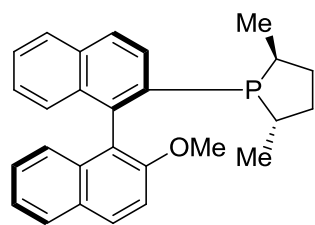

**L1**

$^1\text{H}$  NMR, 400 MHz,  $\text{C}_6\text{D}_6$

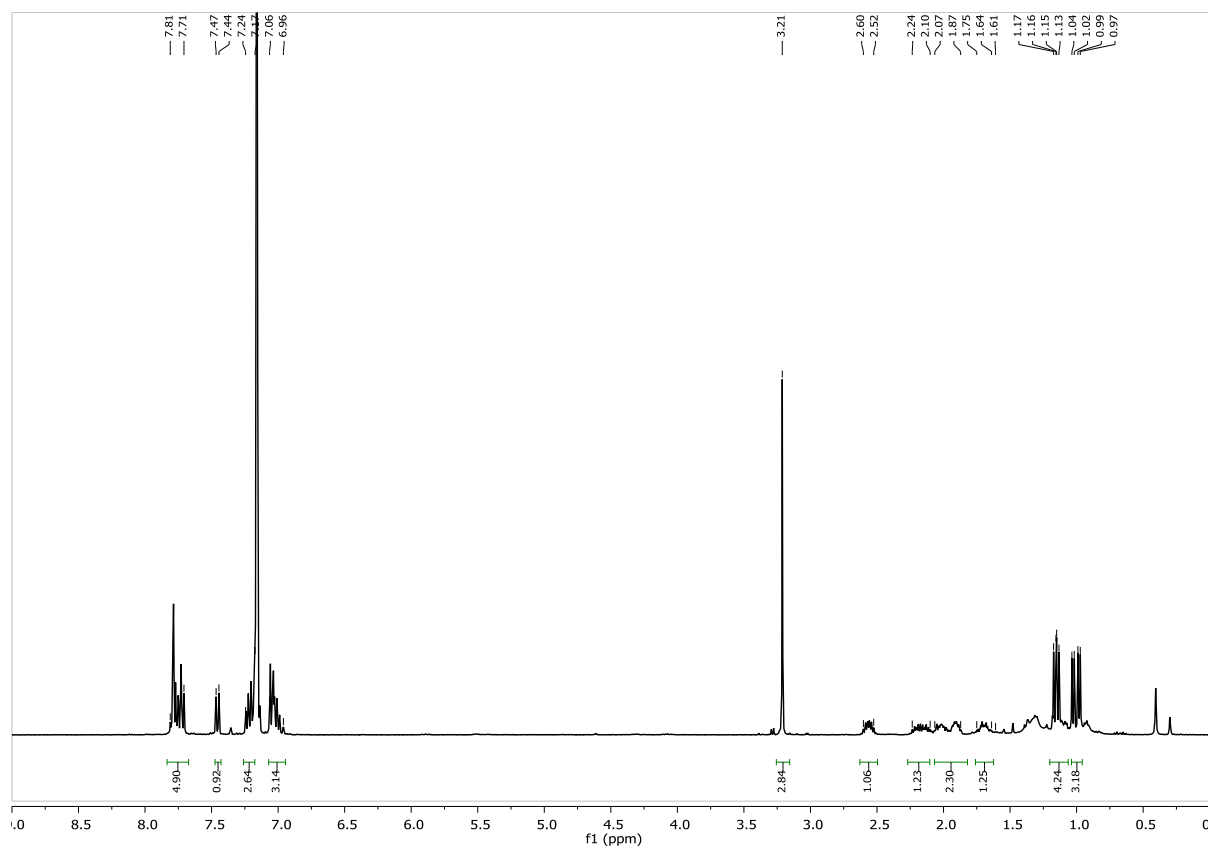



Supporting Information

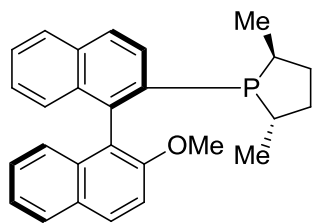

**L1**

$^{13}\text{C}\{^1\text{H}\}$  NMR, 101 MHz,  $\text{C}_6\text{D}_6$

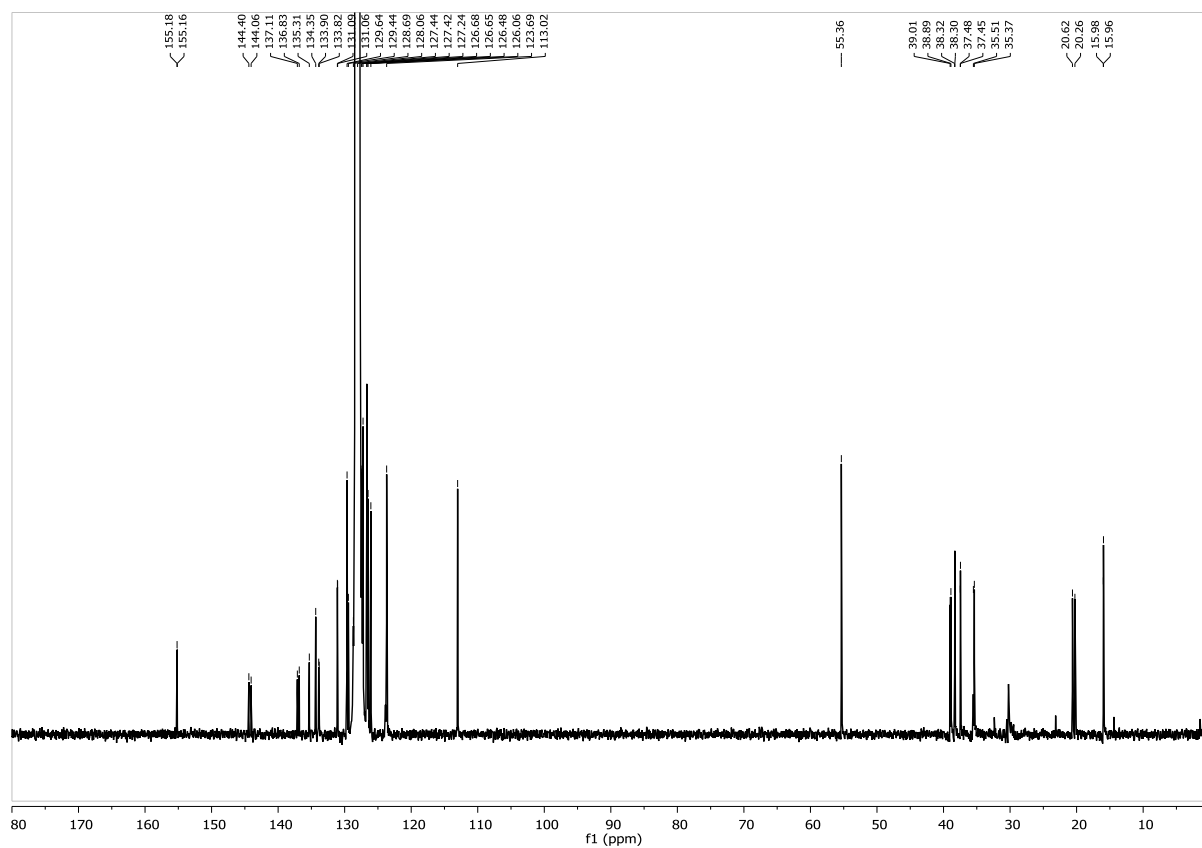

*Supporting Information*



**L1**

$^{31}\text{P}\{^1\text{H}\}$  NMR, 162 MHz,  $\text{C}_6\text{D}_6$

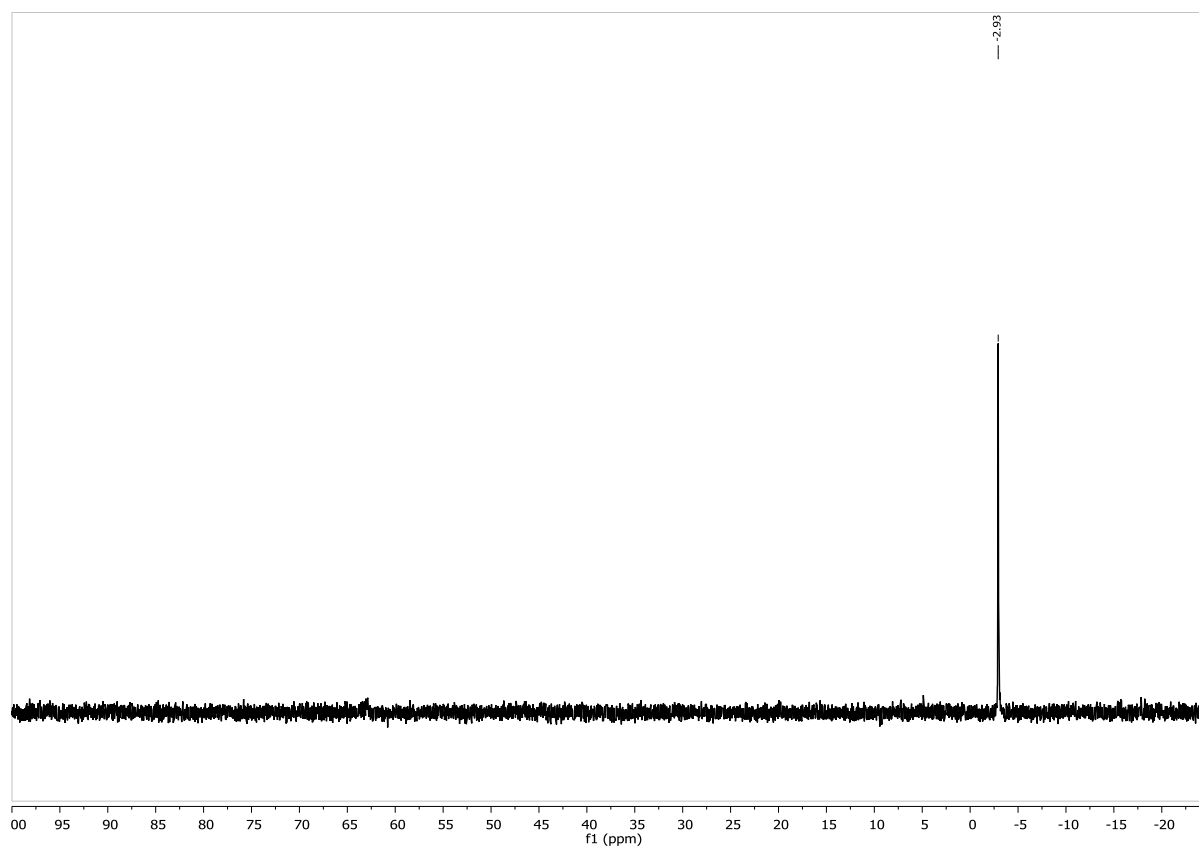

# Supporting Information

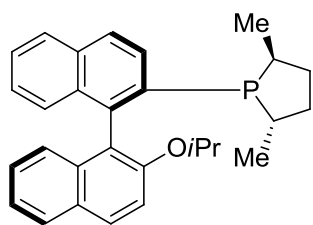

**L2**

$^1\text{H}$  NMR, 400 MHz,  $\text{C}_6\text{D}_6$

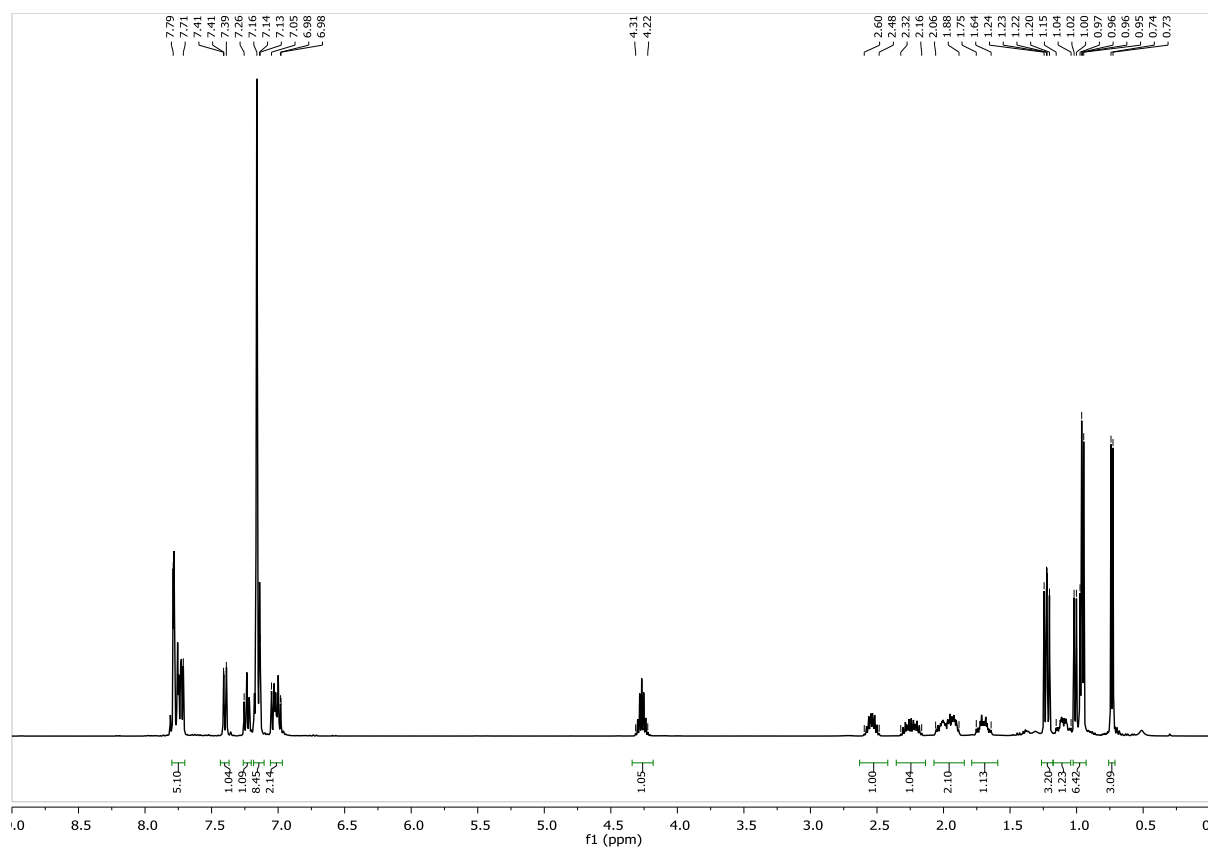

# Supporting Information

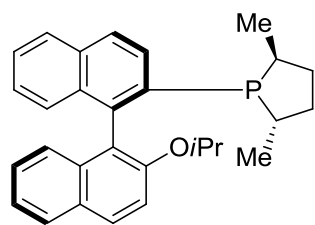

**L2**

$^{13}\text{C}\{^1\text{H}\}$  NMR, 101 MHz,  $\text{C}_6\text{D}_6$

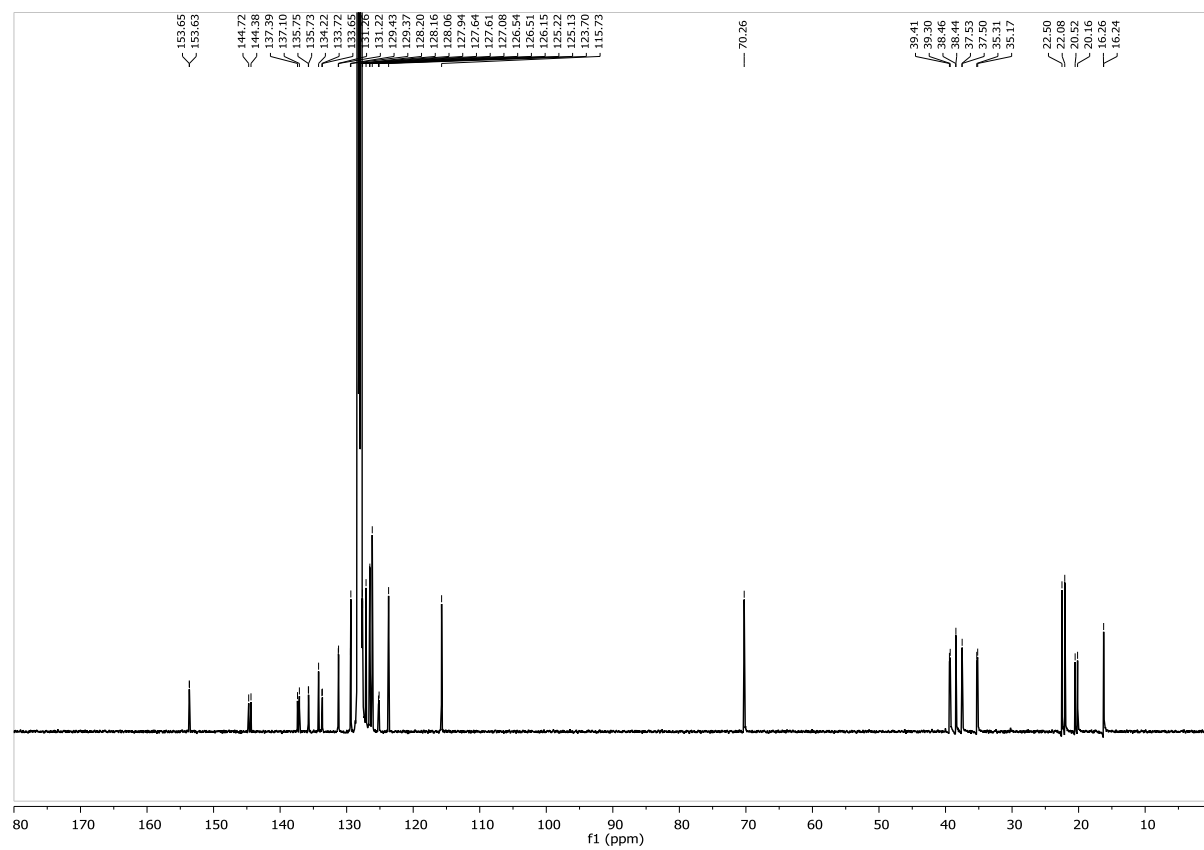

*Supporting Information*

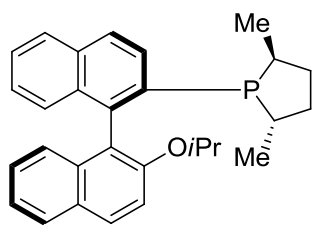

**L2**

$^{31}\text{P}\{^1\text{H}\}$  NMR, 162 MHz,  $\text{C}_6\text{D}_6$

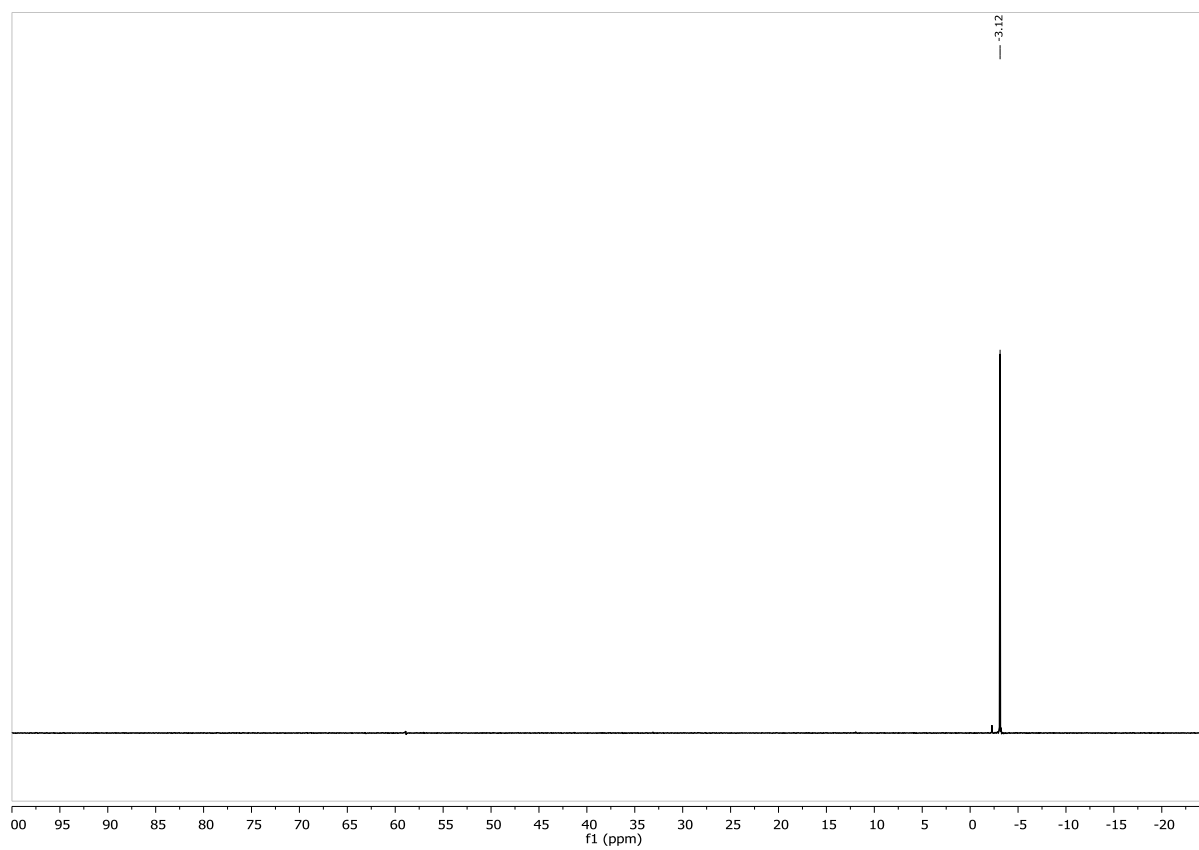

# Supporting Information

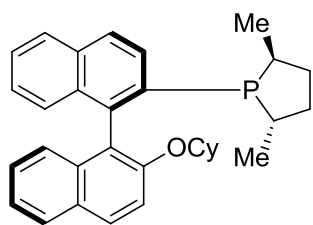

**L3**

$^1\text{H}$  NMR, 400 MHz,  $\text{C}_6\text{D}_6$

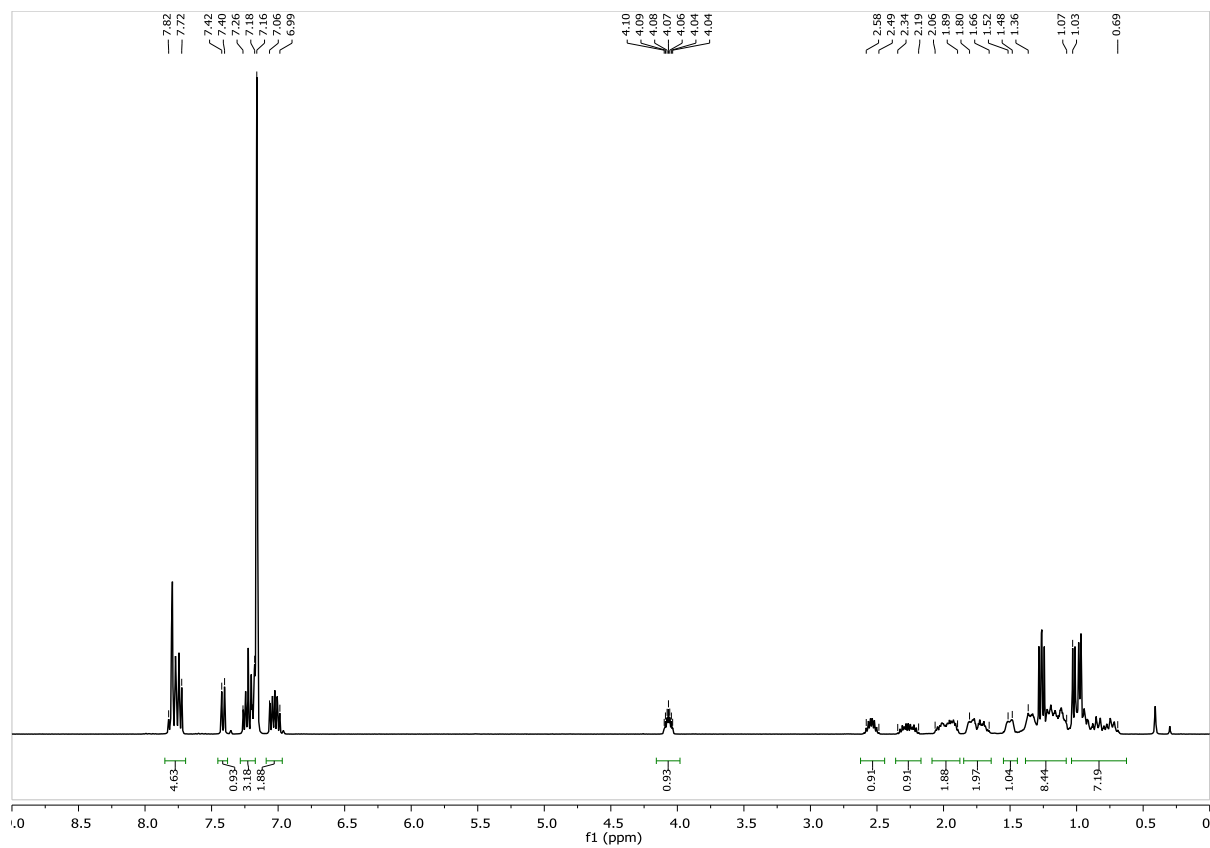

# Supporting Information

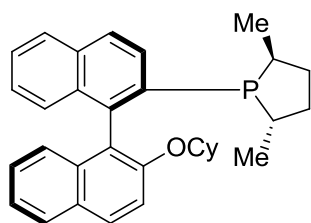

**L3**

$^{13}\text{C}\{^1\text{H}\}$  NMR, 101 MHz,  $\text{C}_6\text{D}_6$

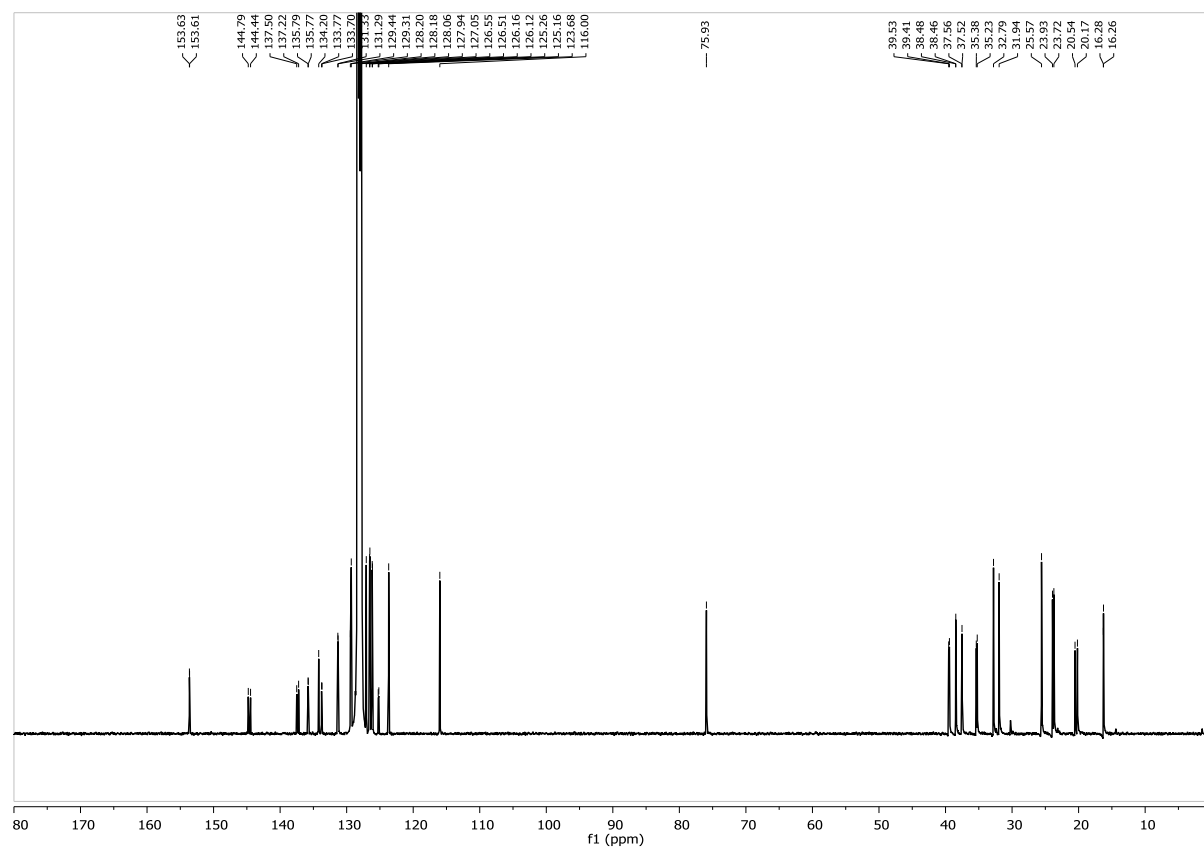

*Supporting Information*

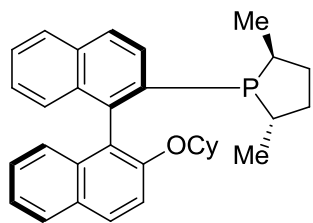

**L3**

$^{31}\text{P}\{^1\text{H}\}$  NMR, 162 MHz,  $\text{C}_6\text{D}_6$

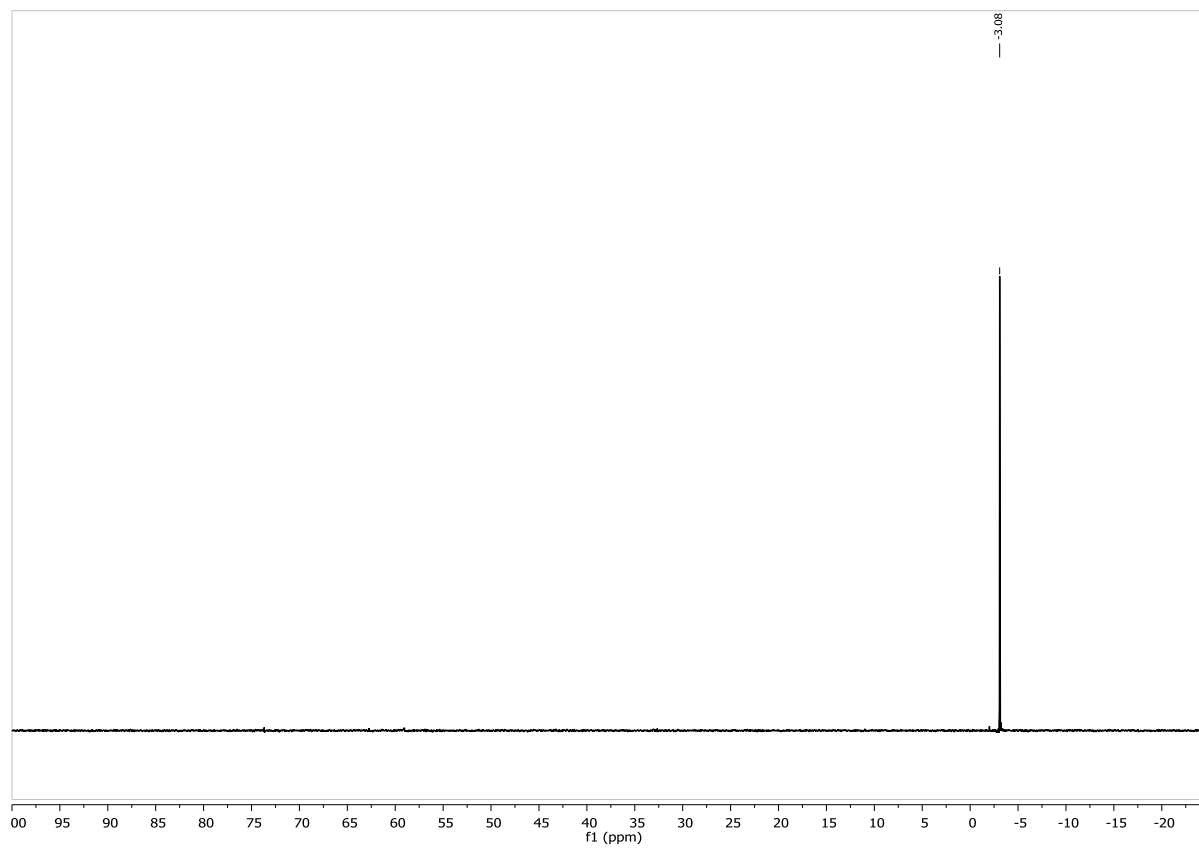



# Supporting Information

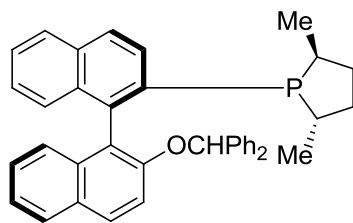

**L4**

$^1\text{H}$  NMR, 400 MHz,  $\text{C}_6\text{D}_6$

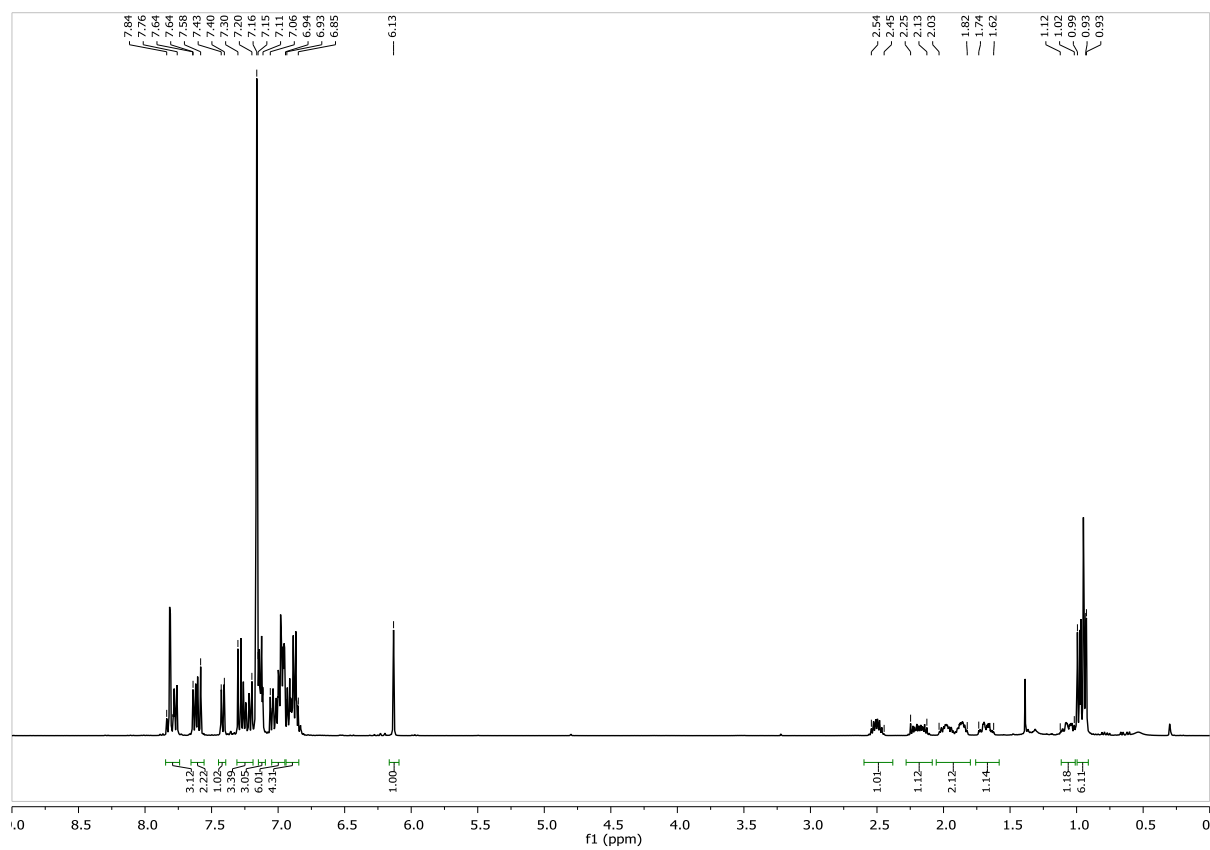

# Supporting Information



**L4**

$^{13}\text{C}\{^1\text{H}\}$  NMR, 101 MHz,  $\text{C}_6\text{D}_6$

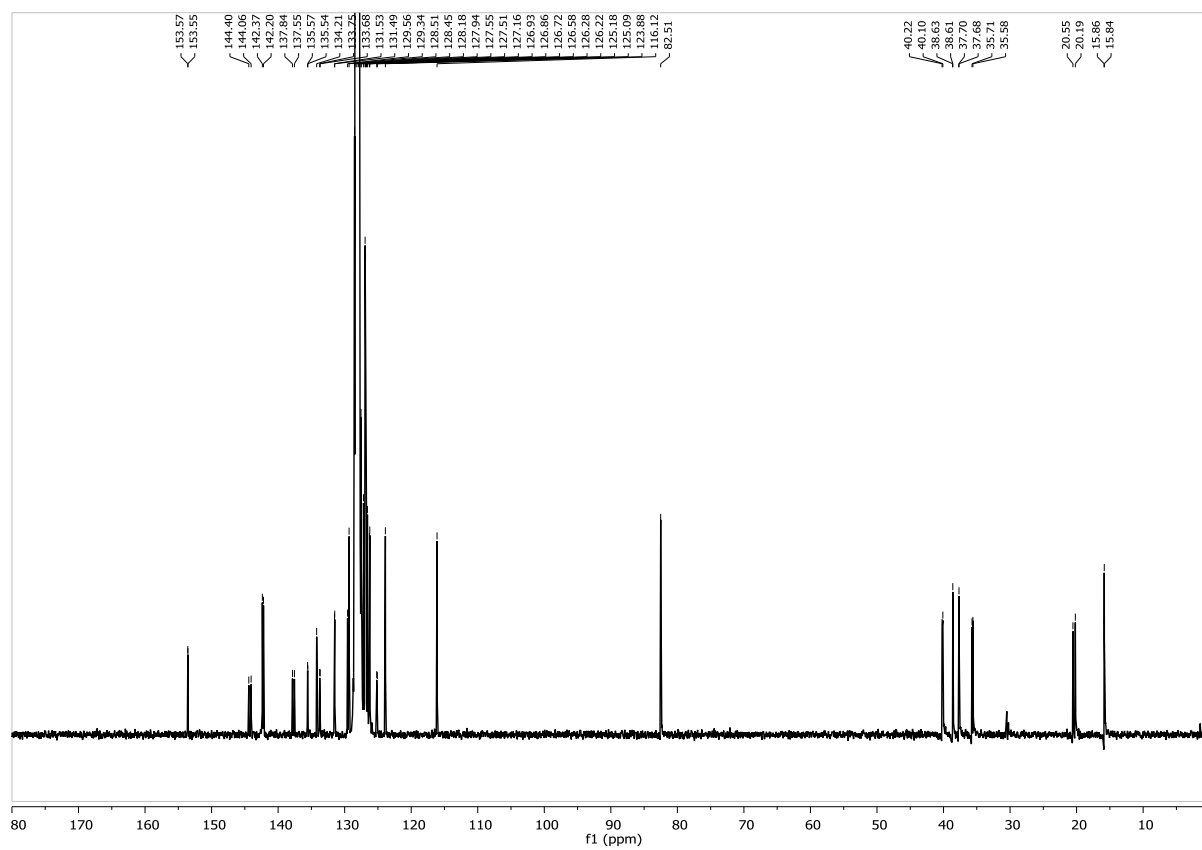

Supporting Information

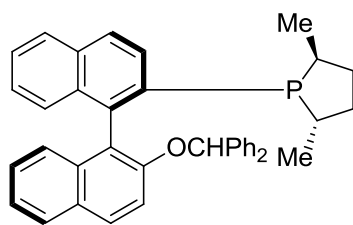

**L4**

$^{31}\text{P}\{^1\text{H}\}$  NMR, 162 MHz,  $\text{C}_6\text{D}_6$

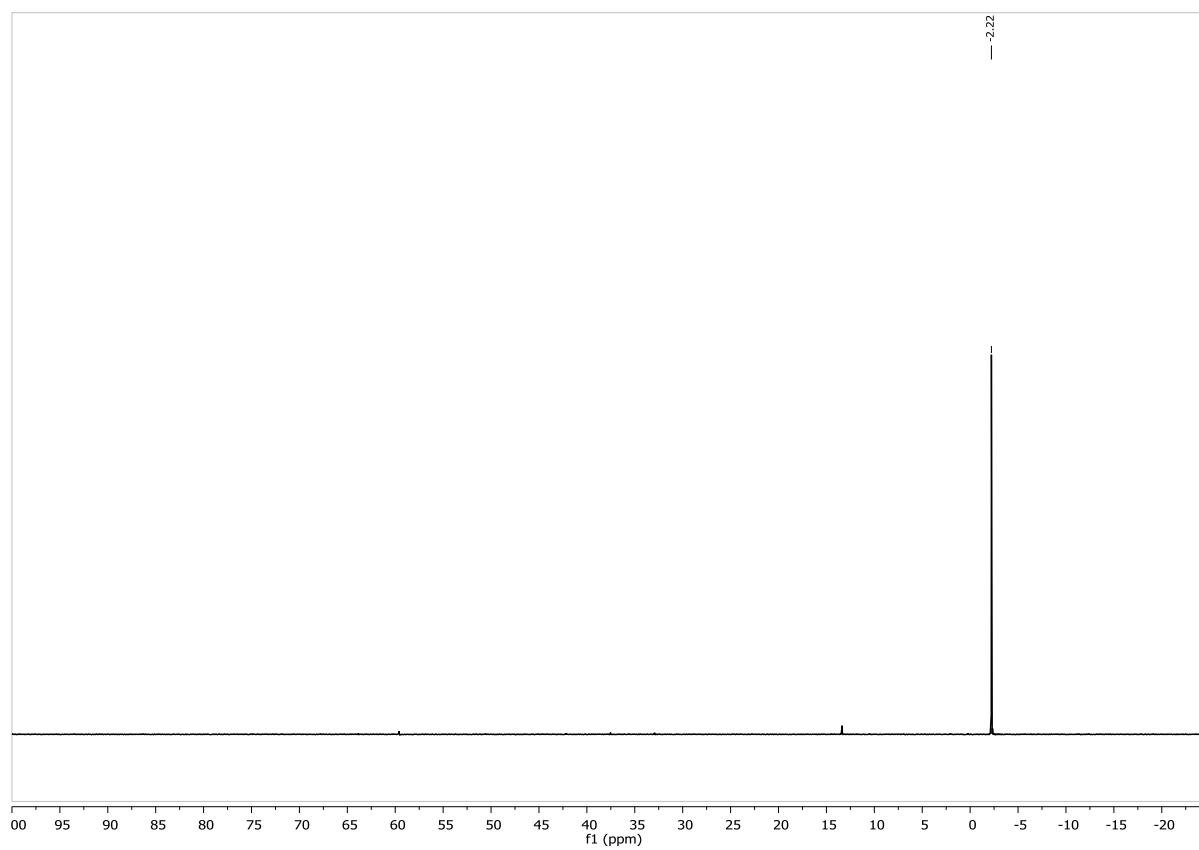

# Supporting Information

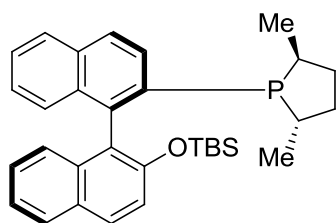

**L5**

$^1\text{H}$  NMR, 400 MHz,  $\text{C}_6\text{D}_6$

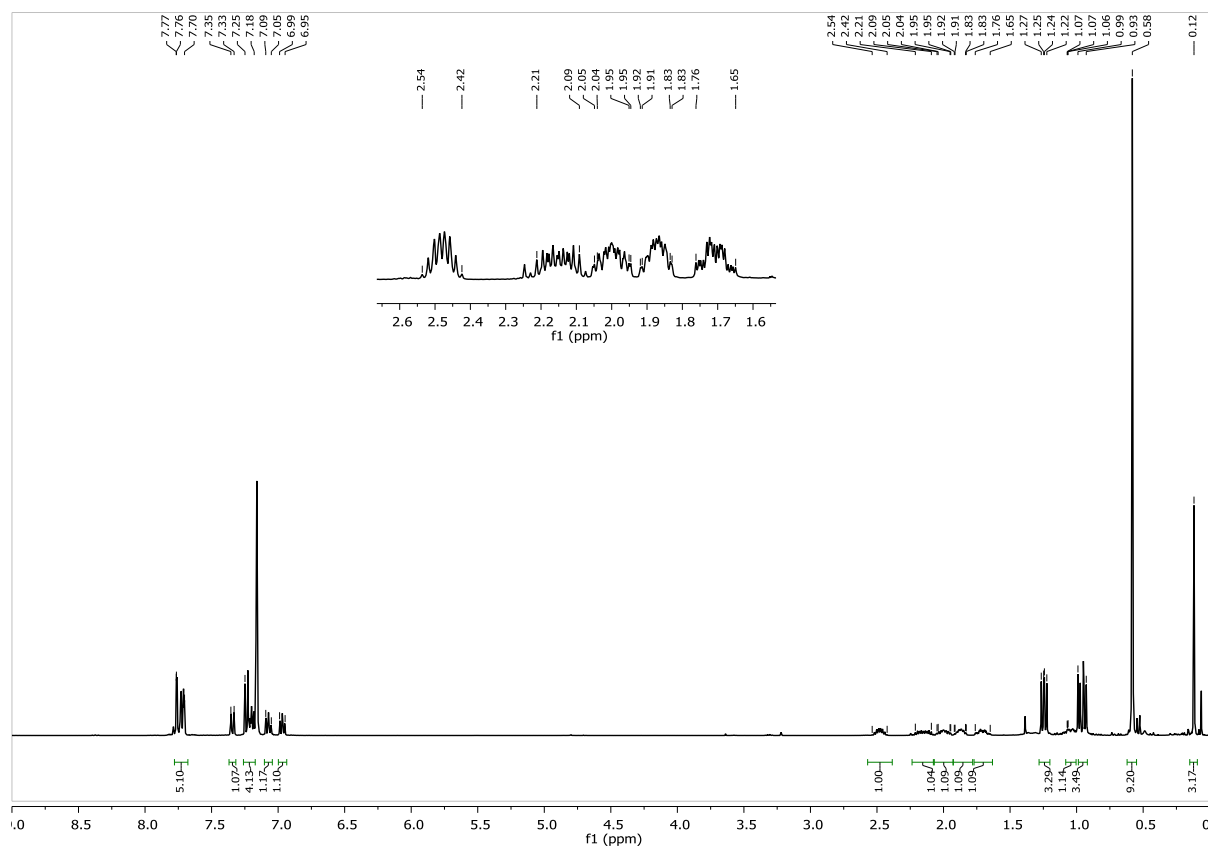

Supporting Information

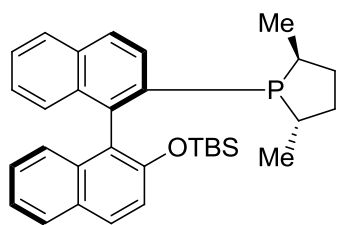

**L5**

$^{13}\text{C}\{^1\text{H}\}$  NMR, 101 MHz,  $\text{C}_6\text{D}_6$

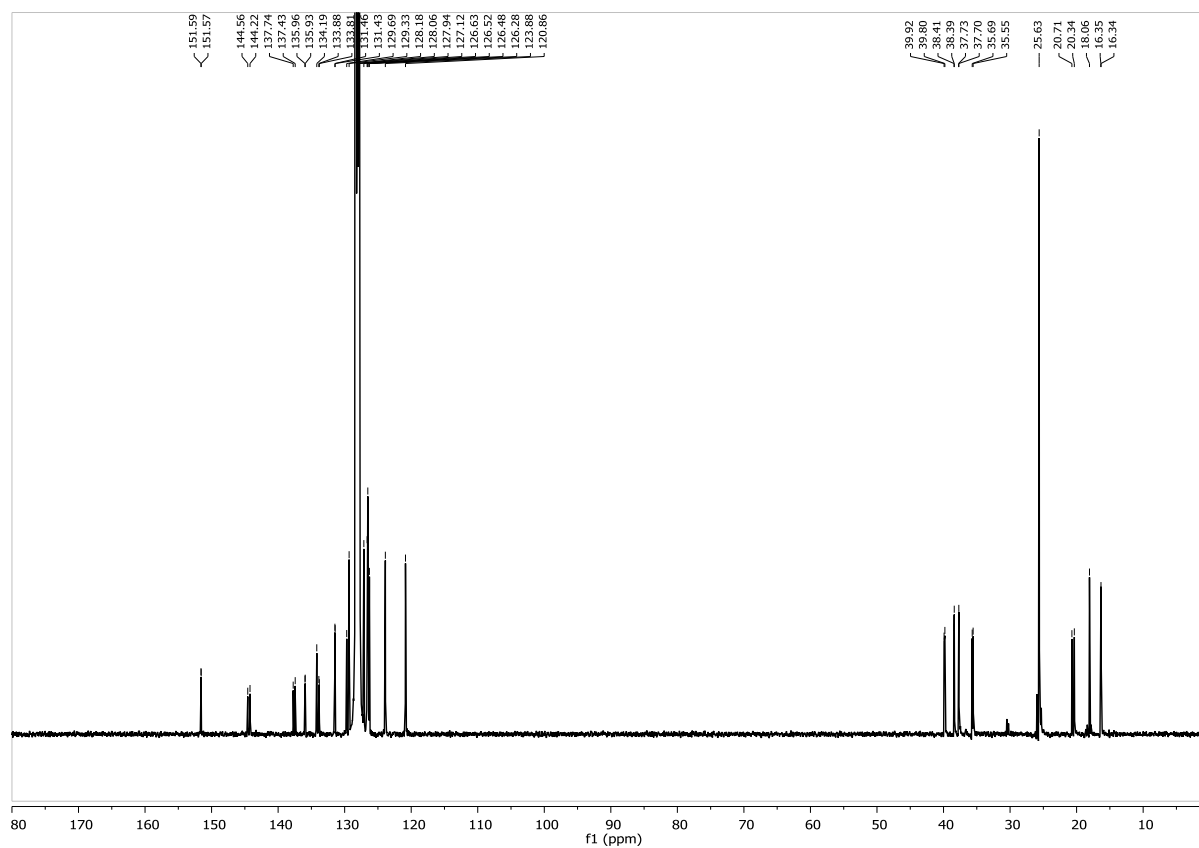

*Supporting Information*

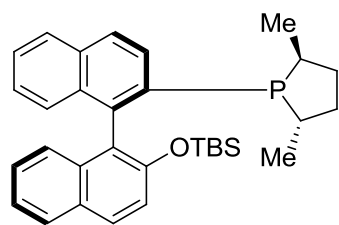

**L5**

$^{31}\text{P}\{^1\text{H}\}$  NMR, 162 MHz,  $\text{C}_6\text{D}_6$

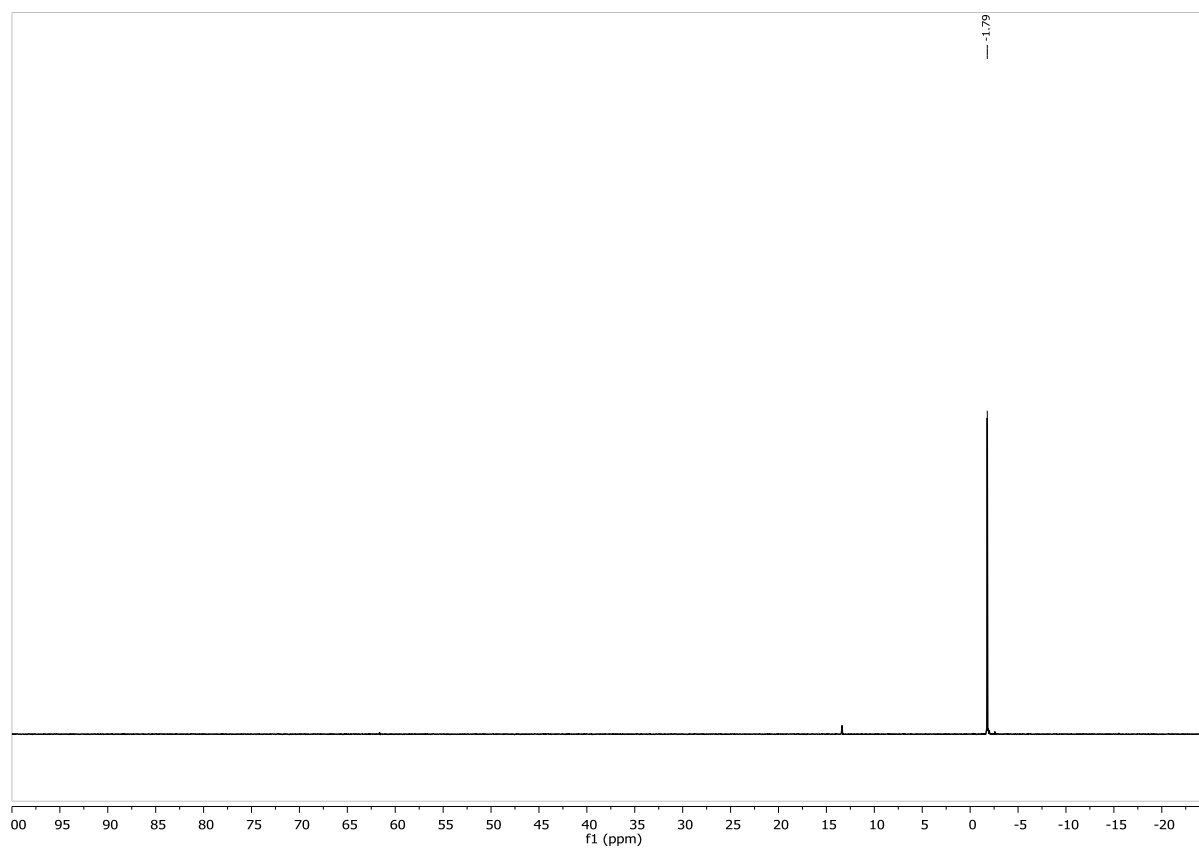

# Supporting Information

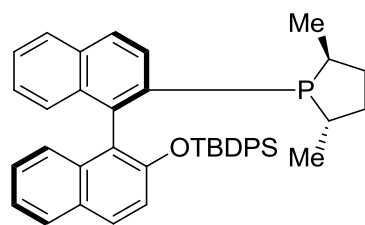

**L6**

$^1\text{H}$  NMR, 400 MHz,  $\text{C}_6\text{D}_6$

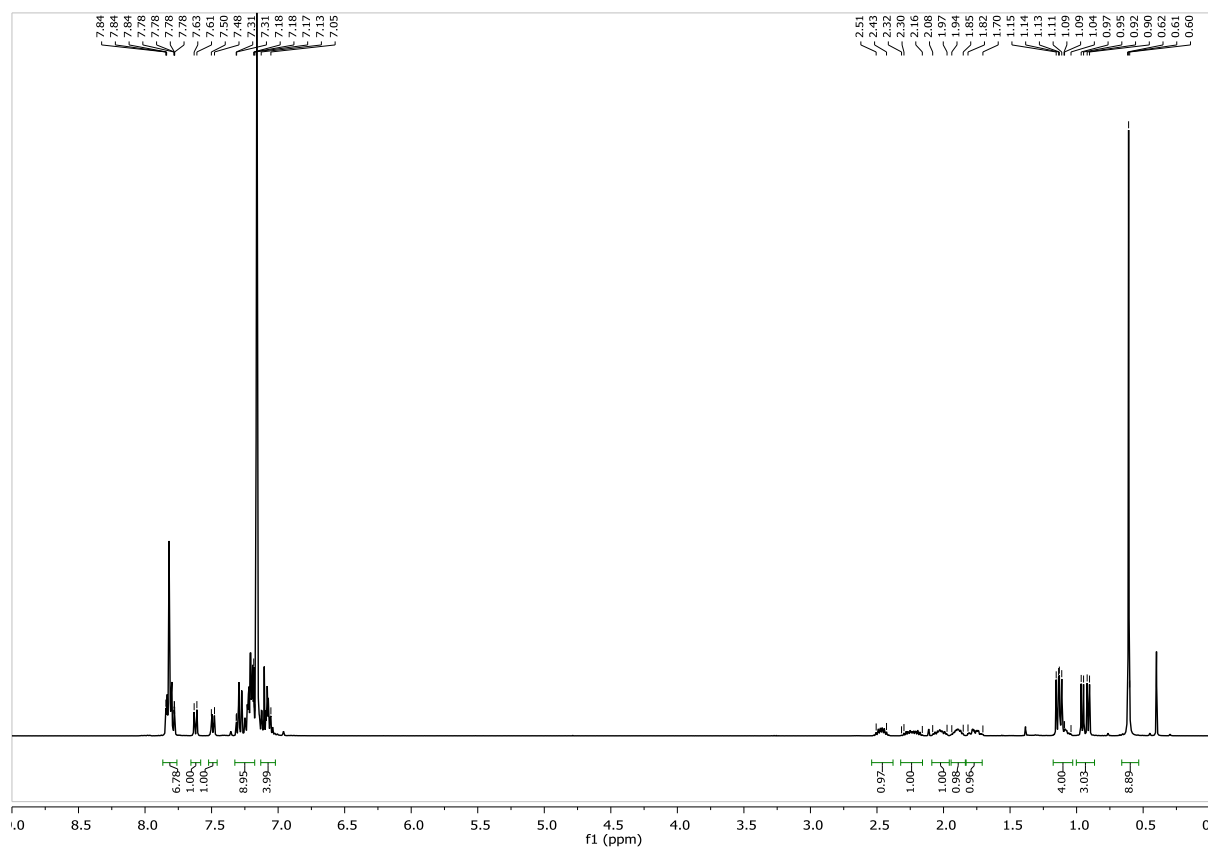

# Supporting Information

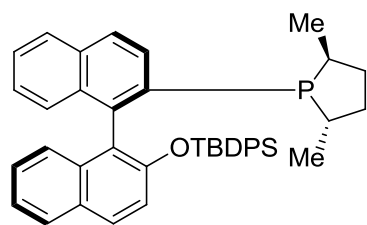

**L6**

$^{13}\text{C}\{^1\text{H}\}$  NMR, 101 MHz,  $\text{C}_6\text{D}_6$

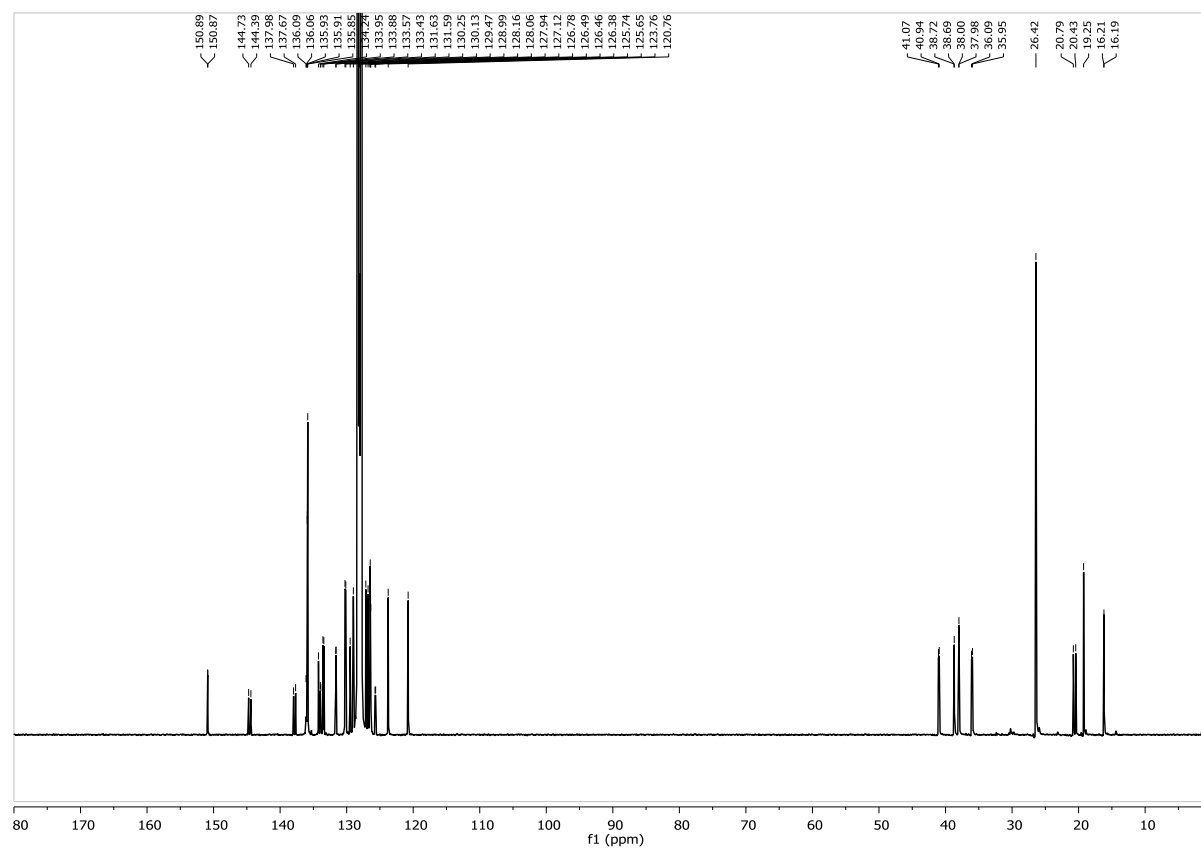



*Supporting Information*



**L6**

$^{31}\text{P}\{^1\text{H}\}$  NMR, 162 MHz,  $\text{C}_6\text{D}_6$

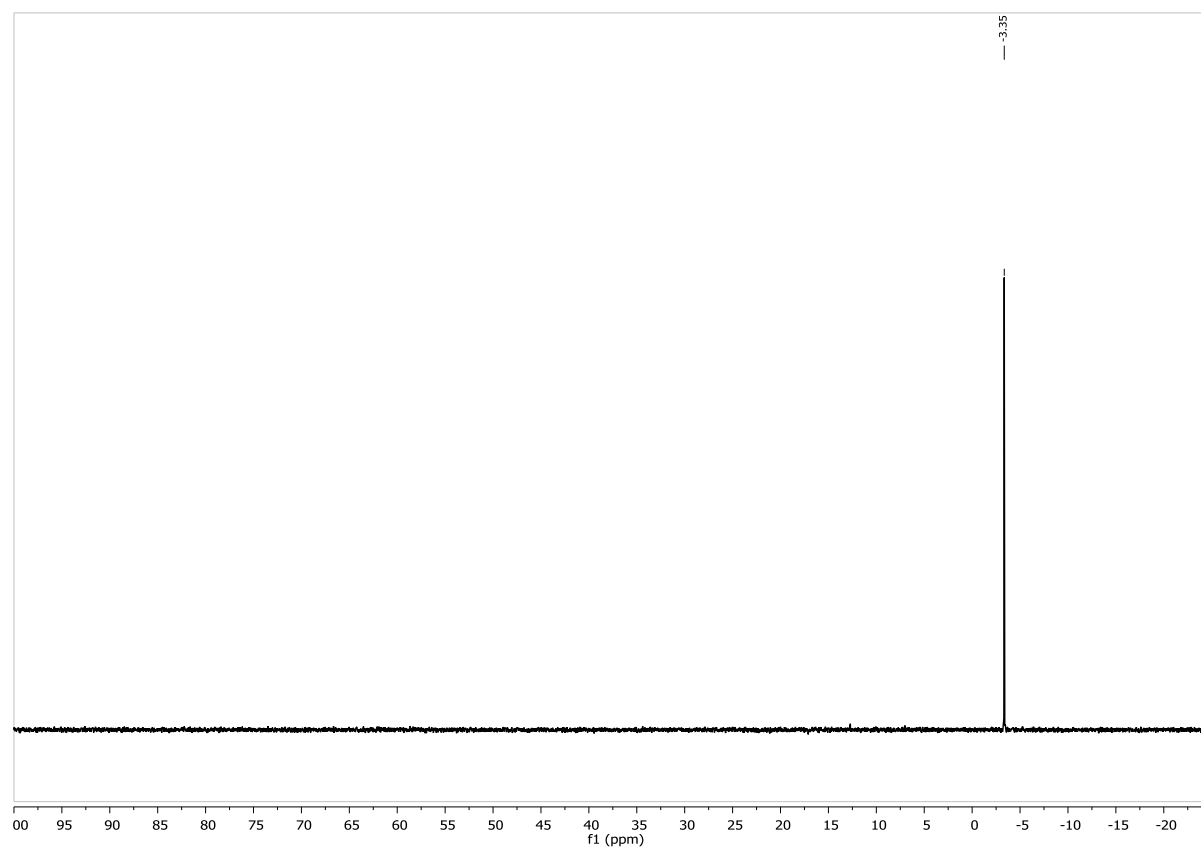

Supporting Information

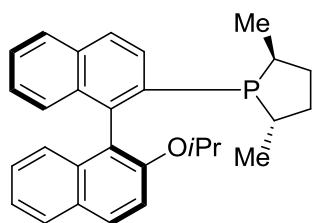

**L7**

$^1\text{H}$  NMR, 400 MHz,  $\text{CDCl}_3$

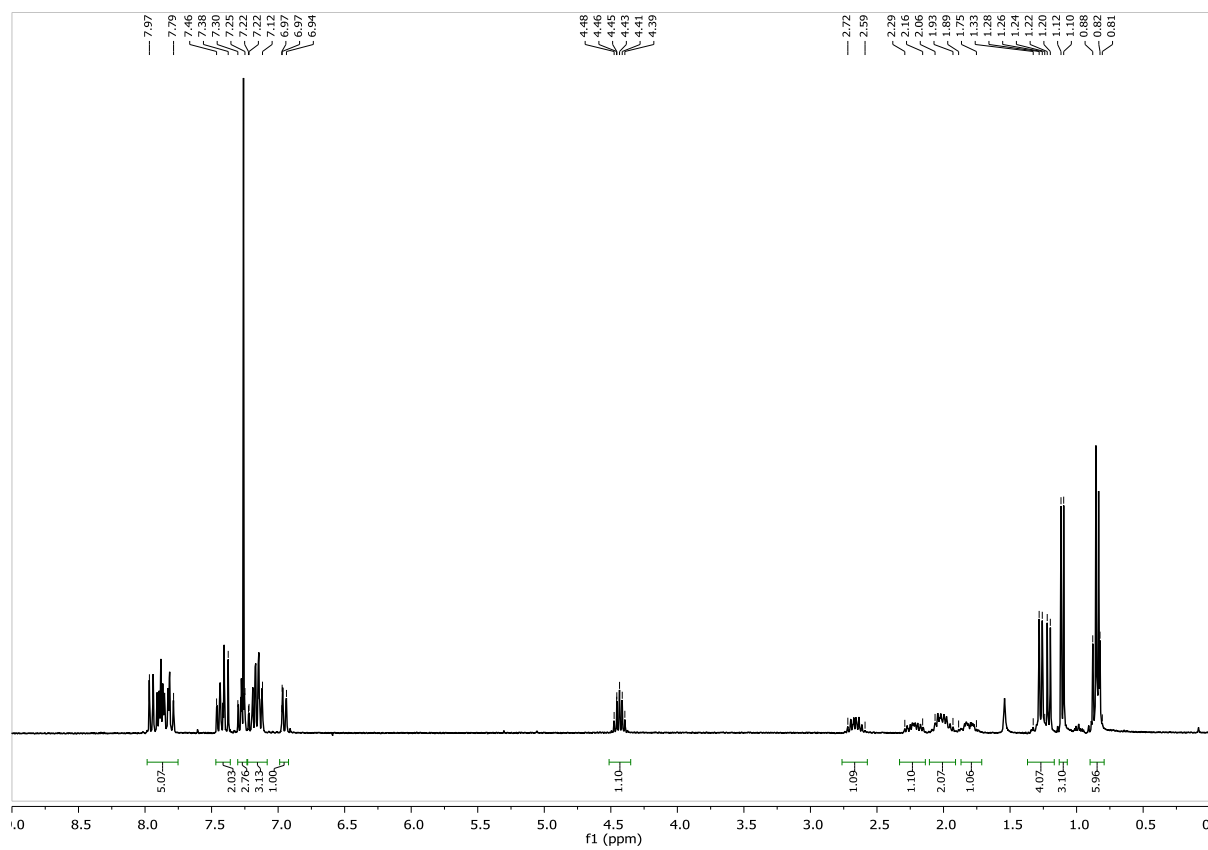

Supporting Information

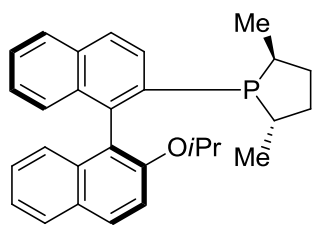

**L7**

$^{13}\text{C}\{^1\text{H}\}$  NMR, 101 MHz,  $\text{C}_6\text{D}_6$

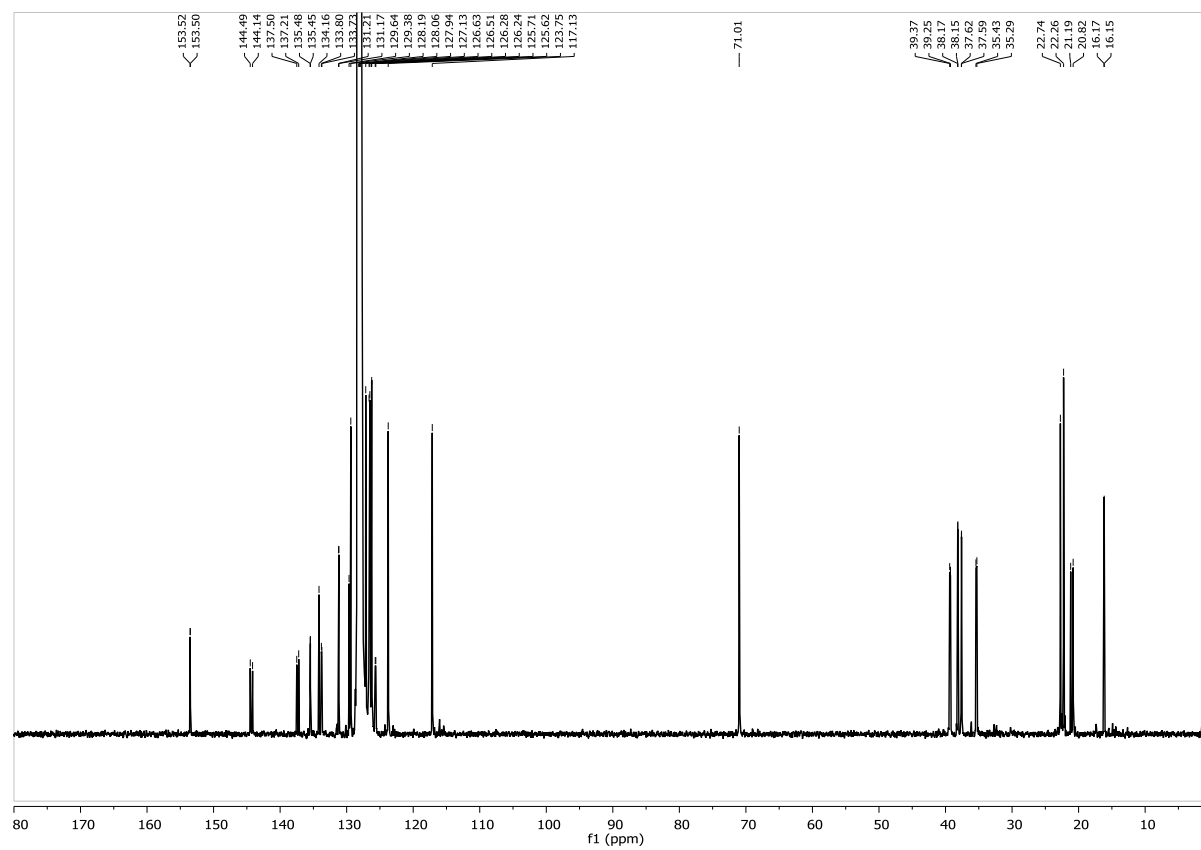

*Supporting Information*



**L7**

$^{31}\text{P}\{^1\text{H}\}$  NMR, 162 MHz,  $\text{CDCl}_3$

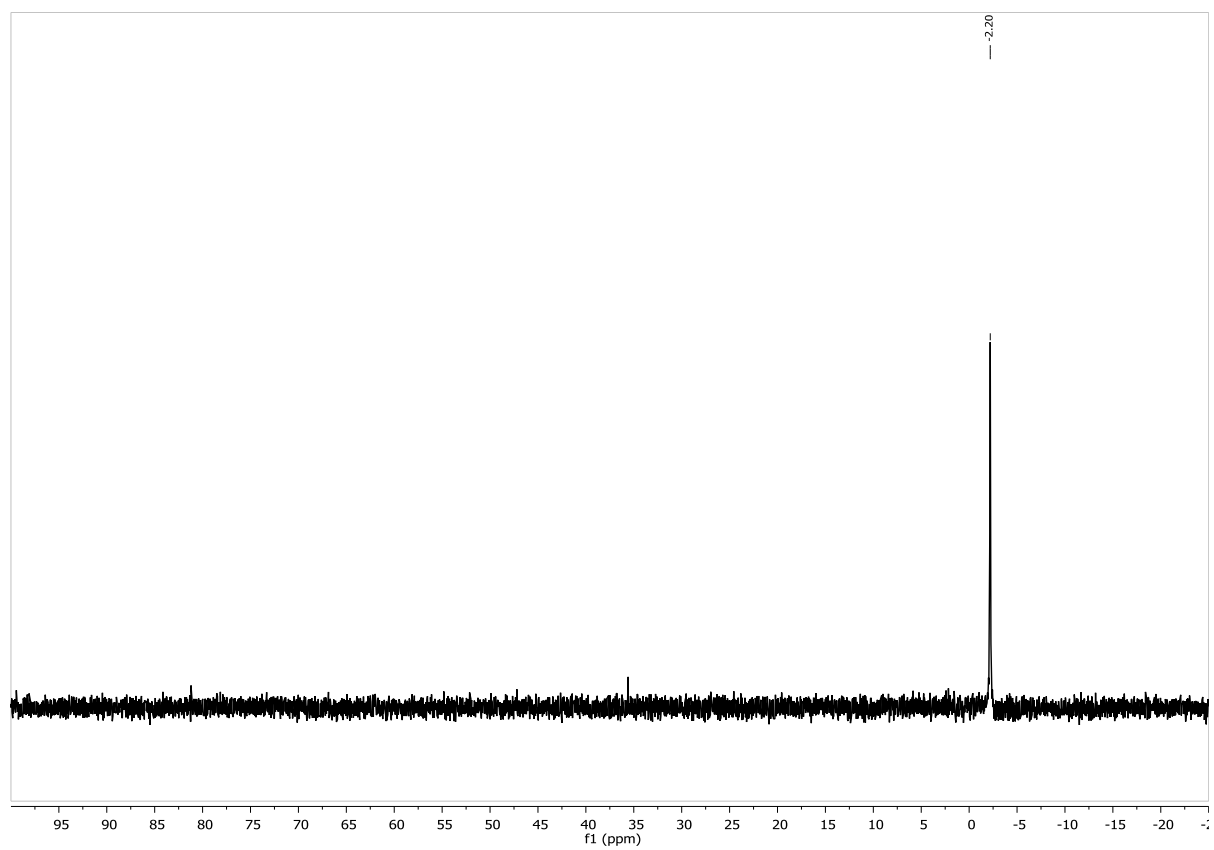

# Supporting Information

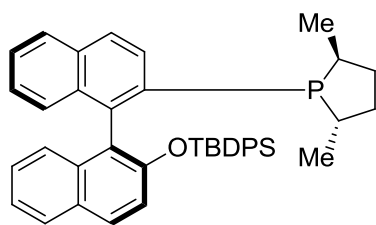

**L8**

$^1\text{H}$  NMR, 400 MHz,  $\text{C}_6\text{D}_6$

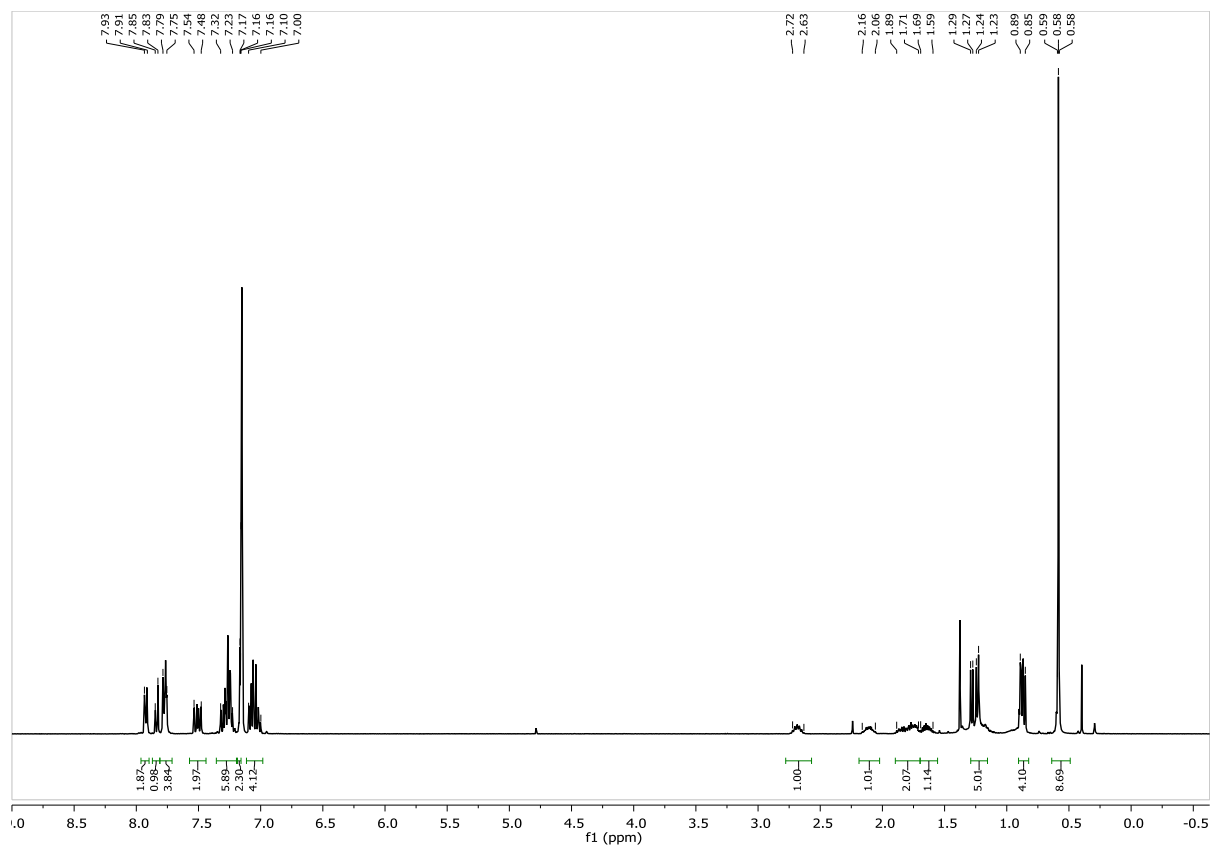

Supporting Information



**L8**

$^{13}\text{C}\{^1\text{H}\}$  NMR, 101 MHz,  $\text{C}_6\text{D}_6$

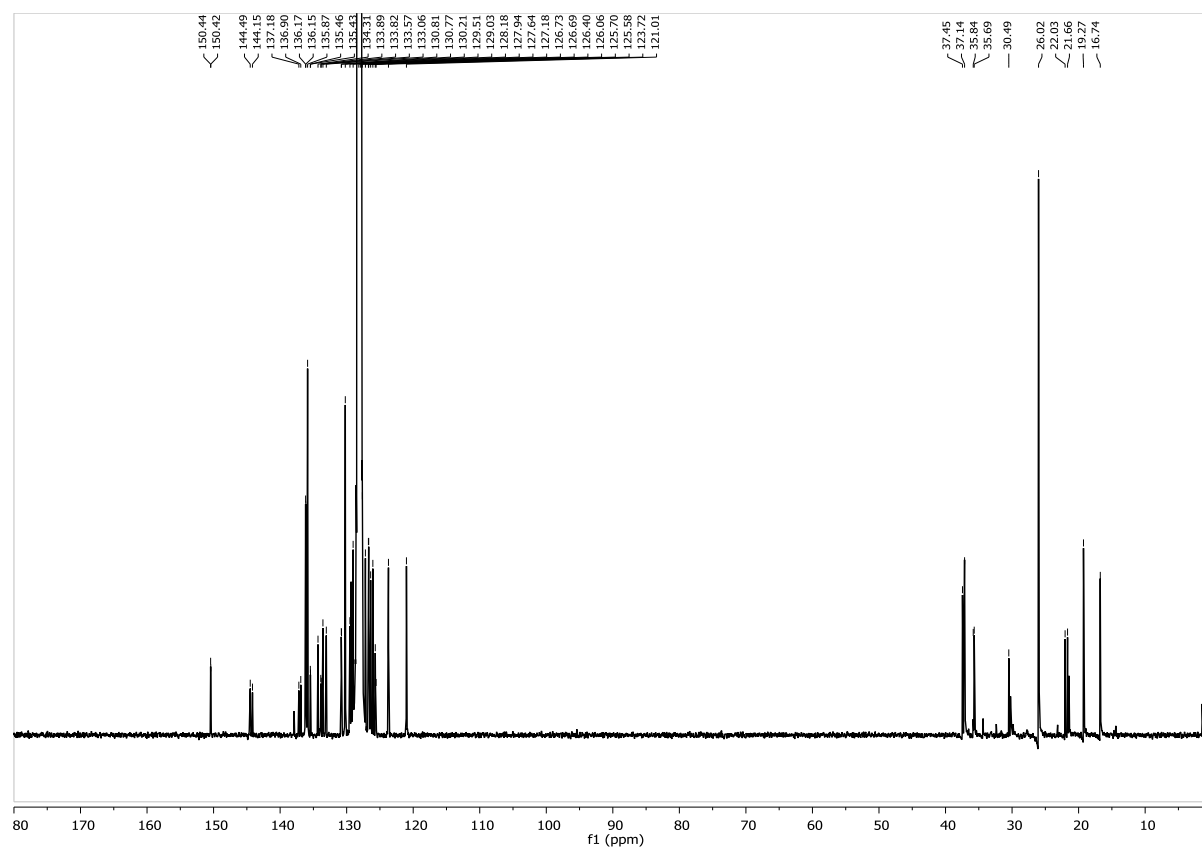

*Supporting Information*



**L8**

$^{31}\text{P}\{^1\text{H}\}$  NMR, 162 MHz,  $\text{C}_6\text{D}_6$

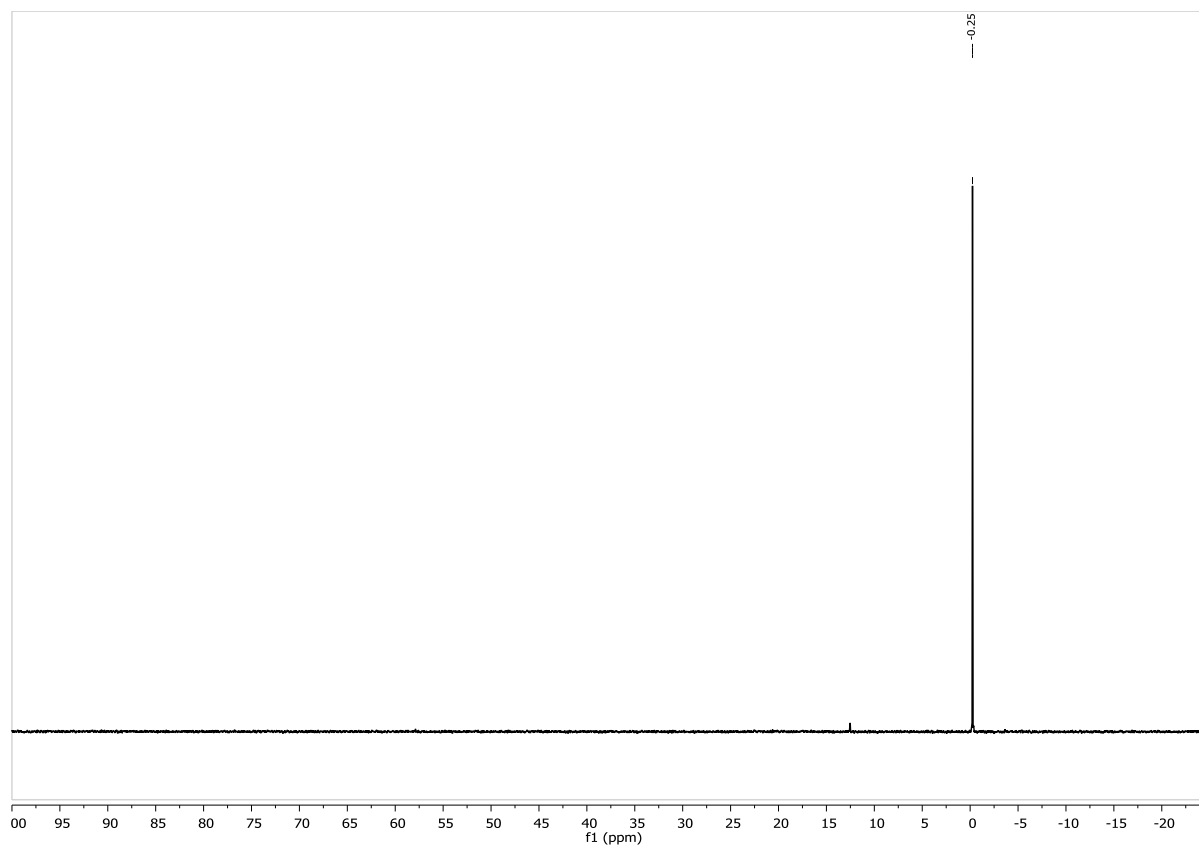

Supporting Information

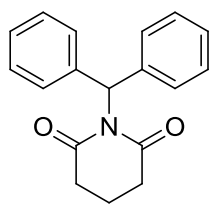

**S5a**

$^1\text{H}$  NMR, 400 MHz,  $\text{CDCl}_3$

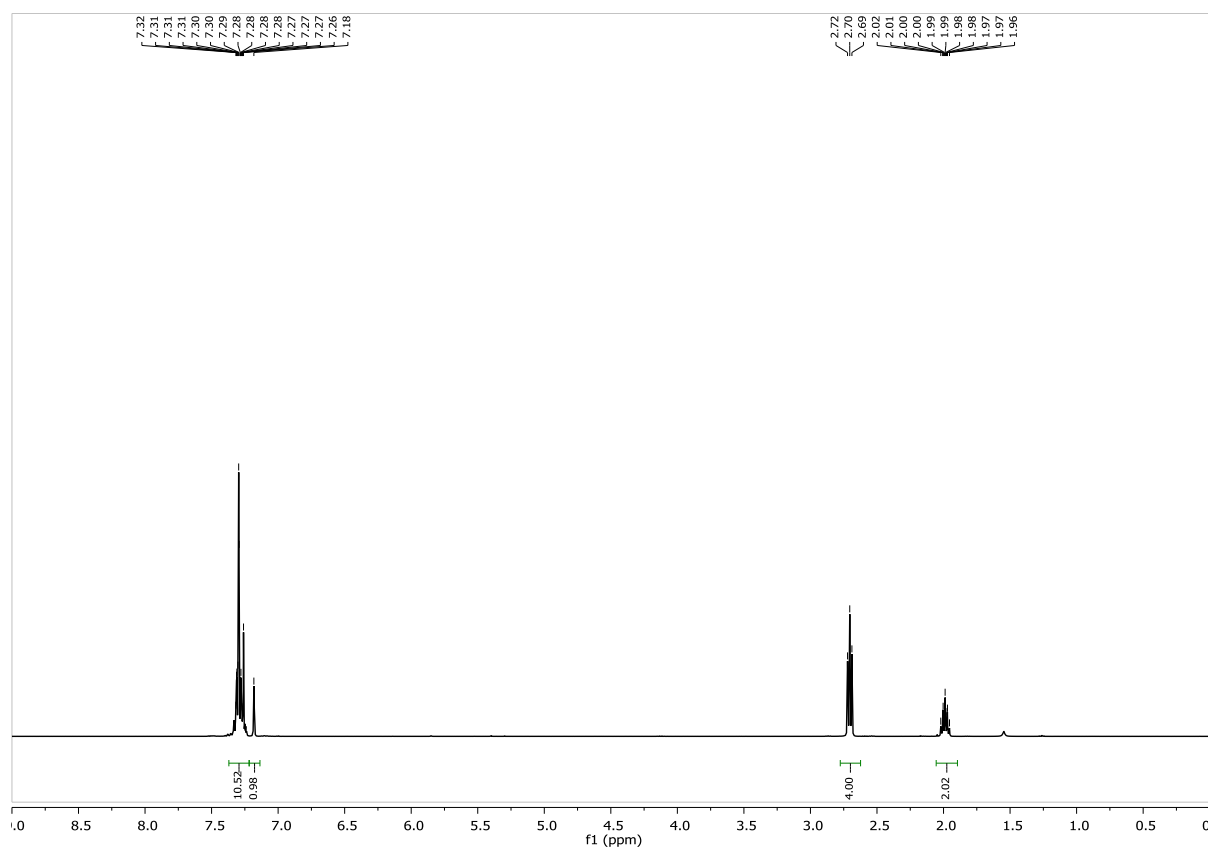



Supporting Information

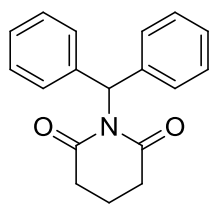

**S5a**

$^{13}\text{C}\{^1\text{H}\}$  NMR, 101 MHz,  $\text{CDCl}_3$

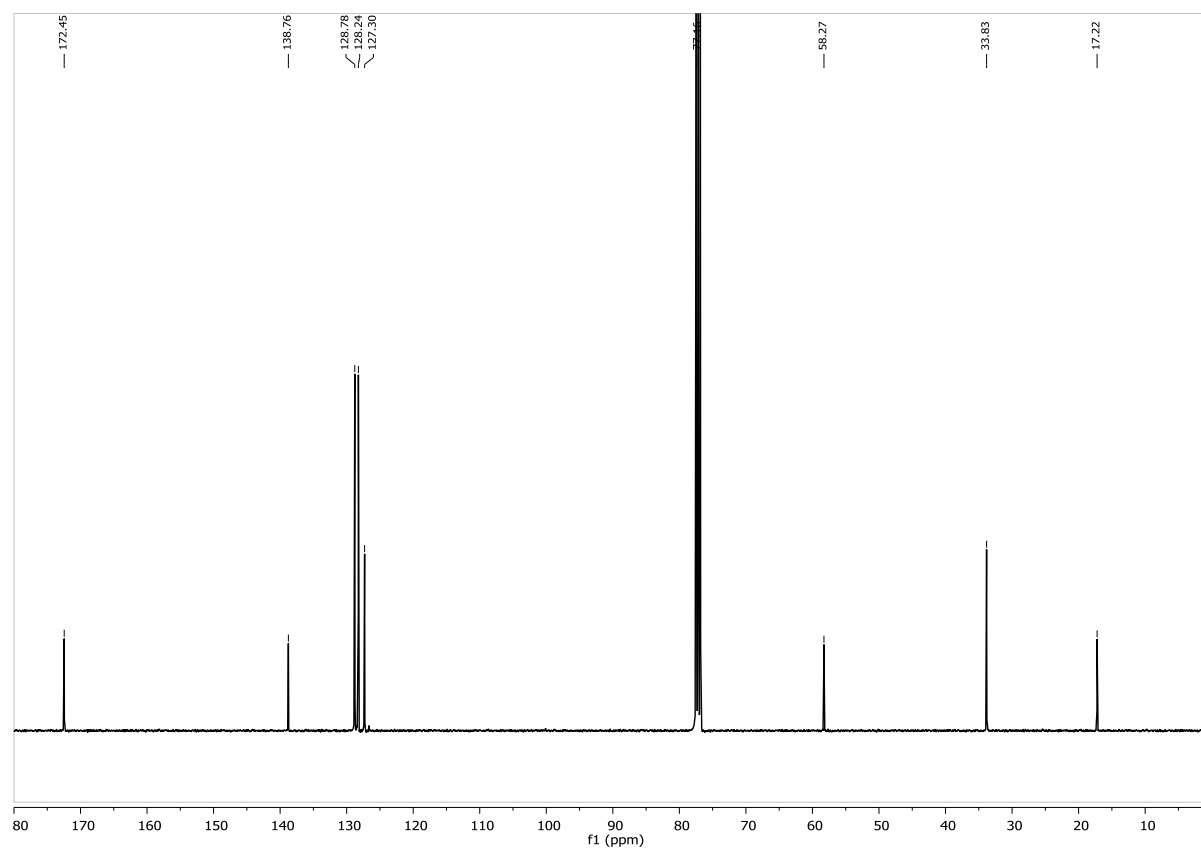

Supporting Information

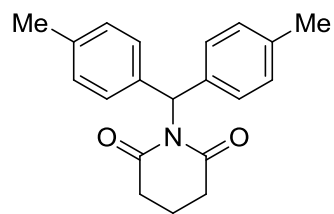

**S5b**

$^1\text{H}$  NMR, 400 MHz,  $\text{CDCl}_3$

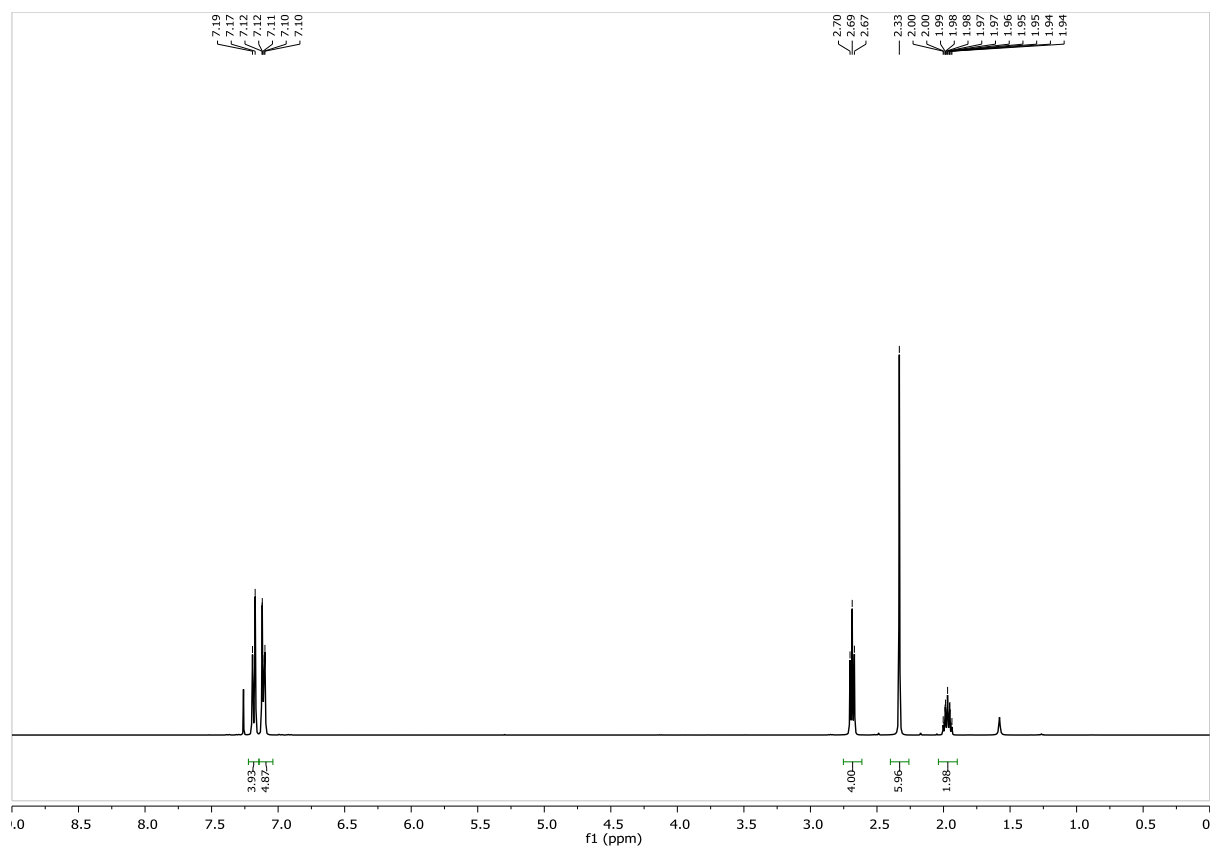

Supporting Information

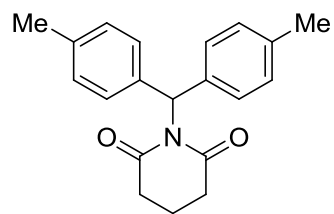

**S5b**

$^{13}\text{C}\{^1\text{H}\}$  NMR, 101 MHz,  $\text{CDCl}_3$

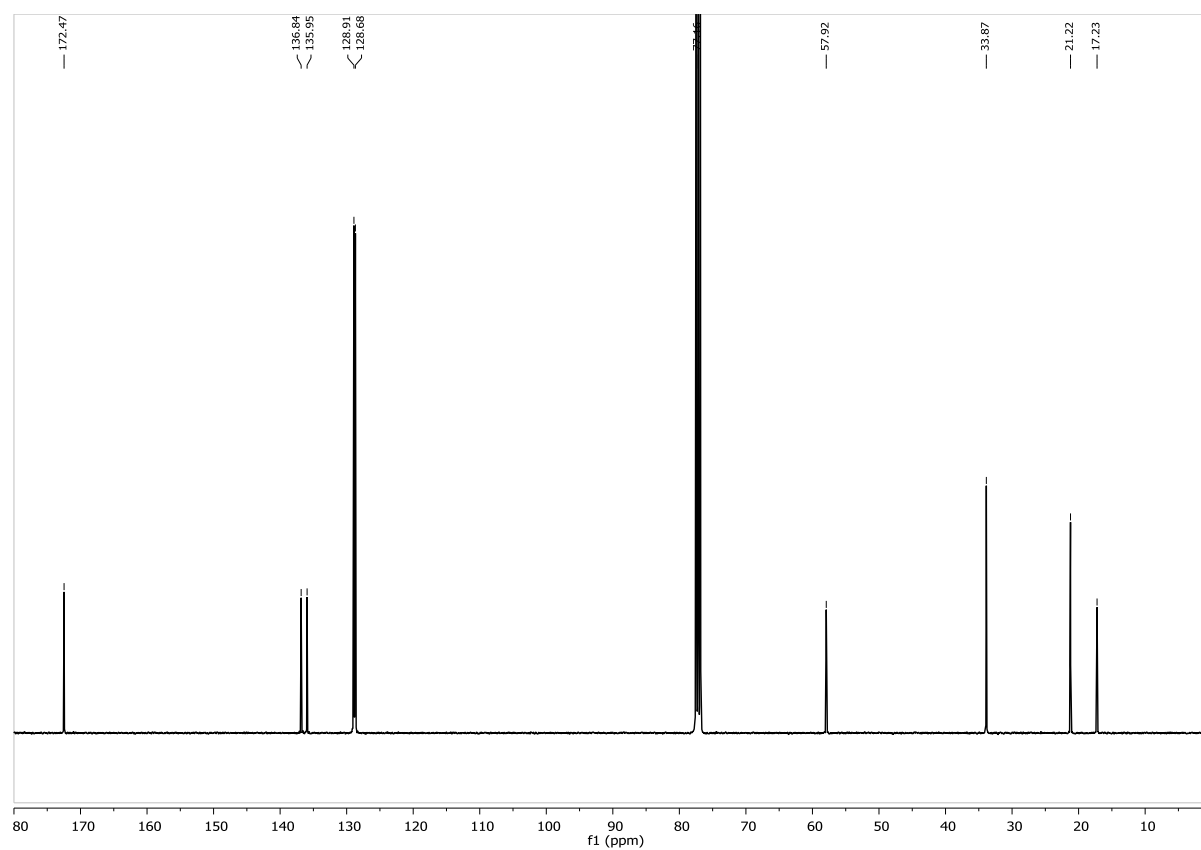

Supporting Information

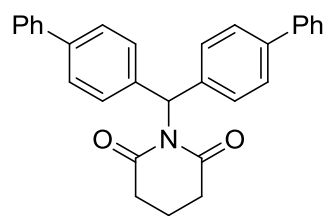

**S5c**

$^1\text{H}$  NMR, 400 MHz,  $\text{CDCl}_3$

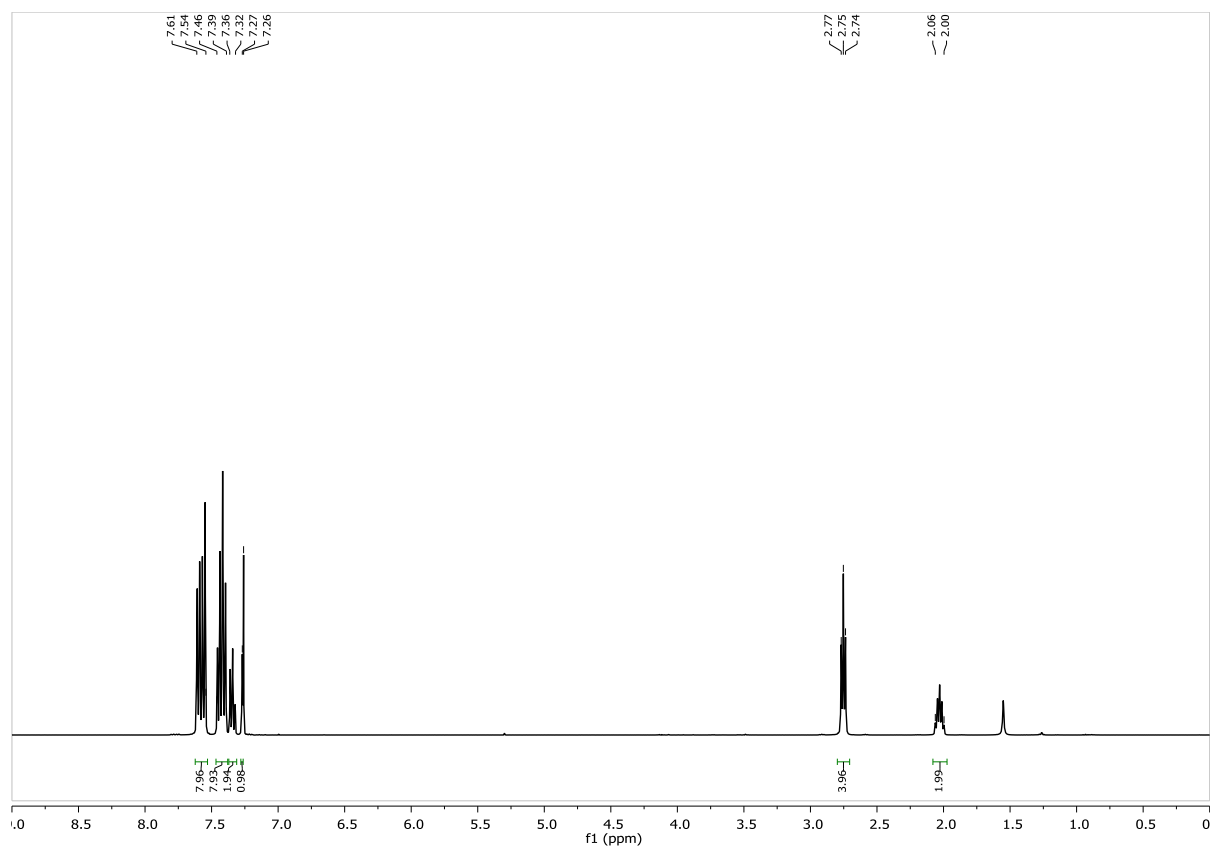

Supporting Information

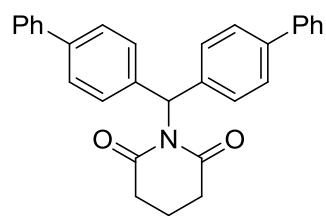

**S5c**

$^{13}\text{C}\{^1\text{H}\}$  NMR, 101 MHz,  $\text{CDCl}_3$

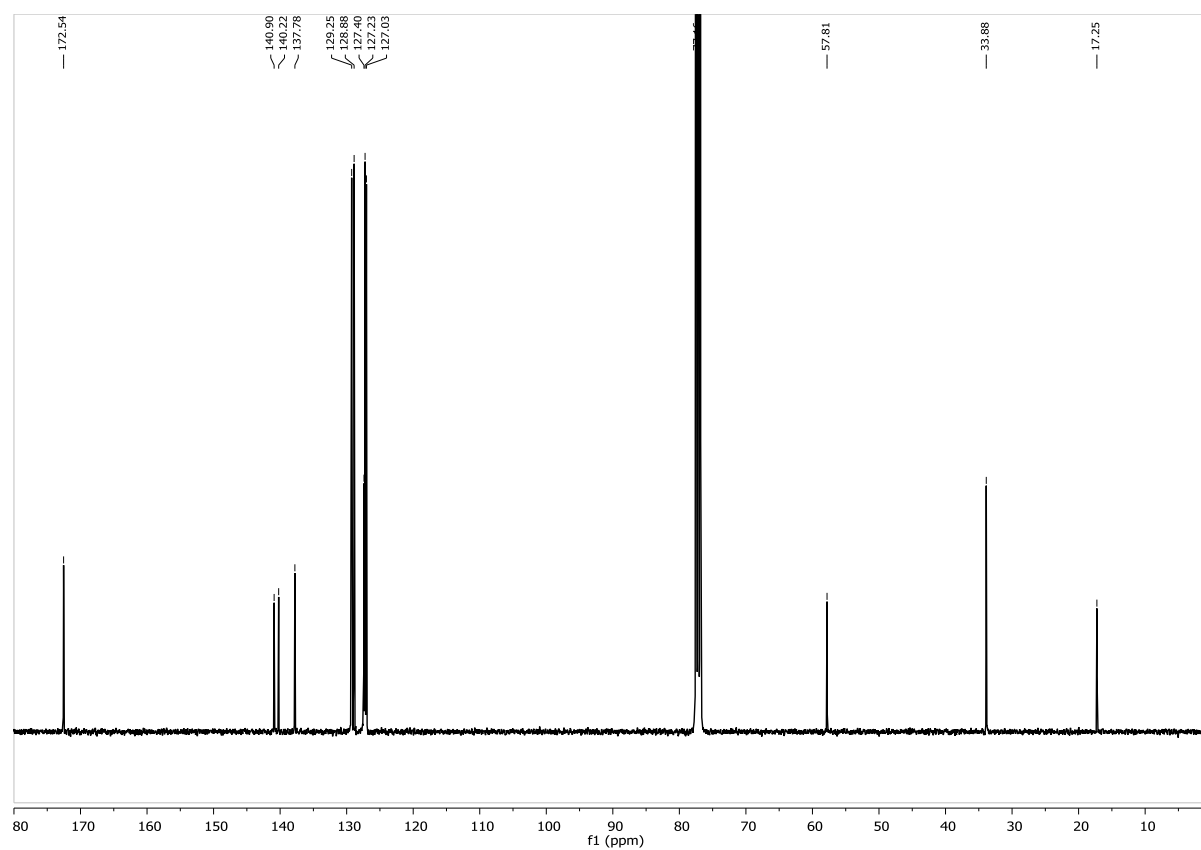

Supporting Information

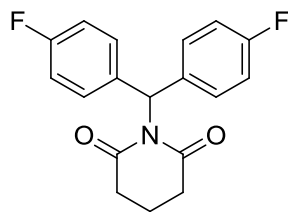

**S5d**

$^1\text{H}$  NMR, 400 MHz,  $\text{CDCl}_3$

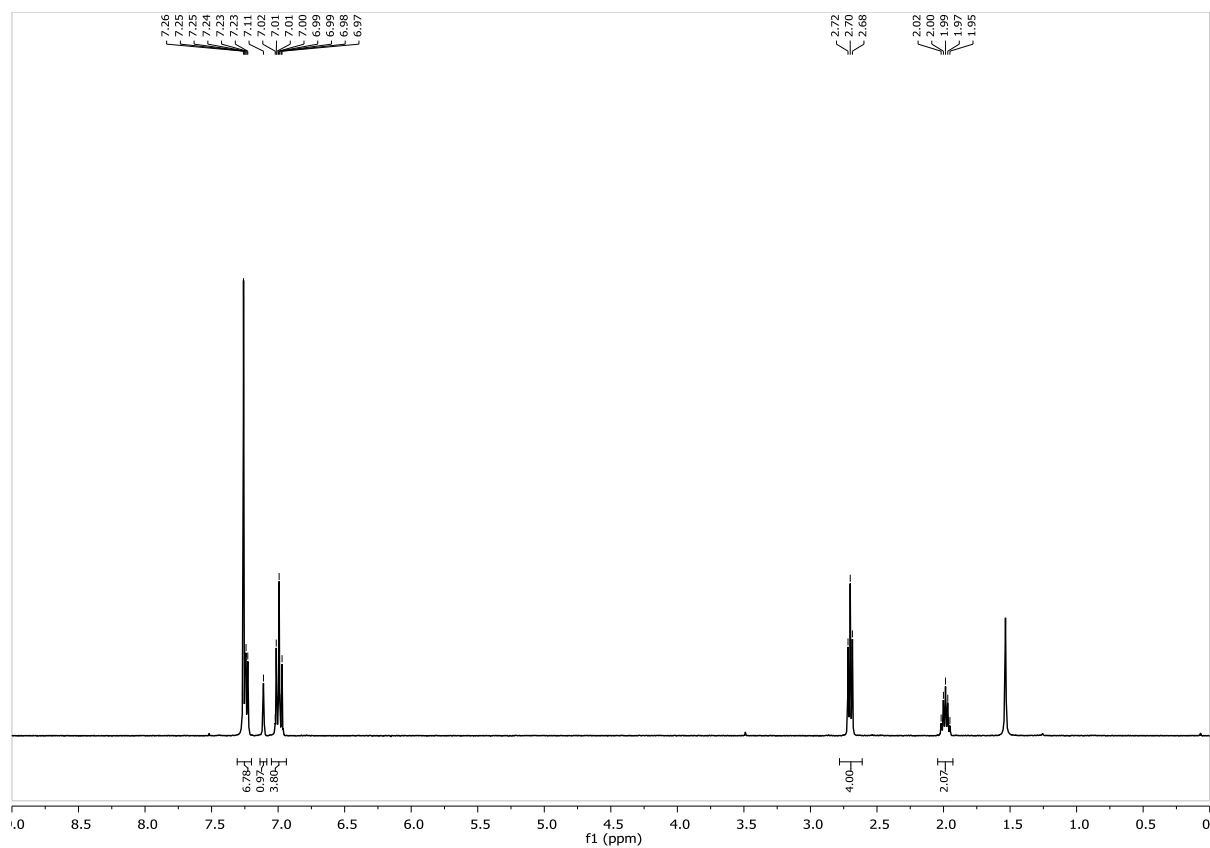

Supporting Information

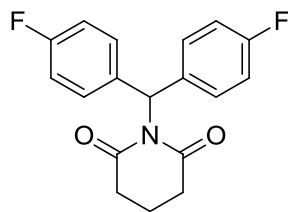

**S5d**

$^{13}\text{C}\{^1\text{H}\}$  NMR, 101 MHz,  $\text{CDCl}_3$

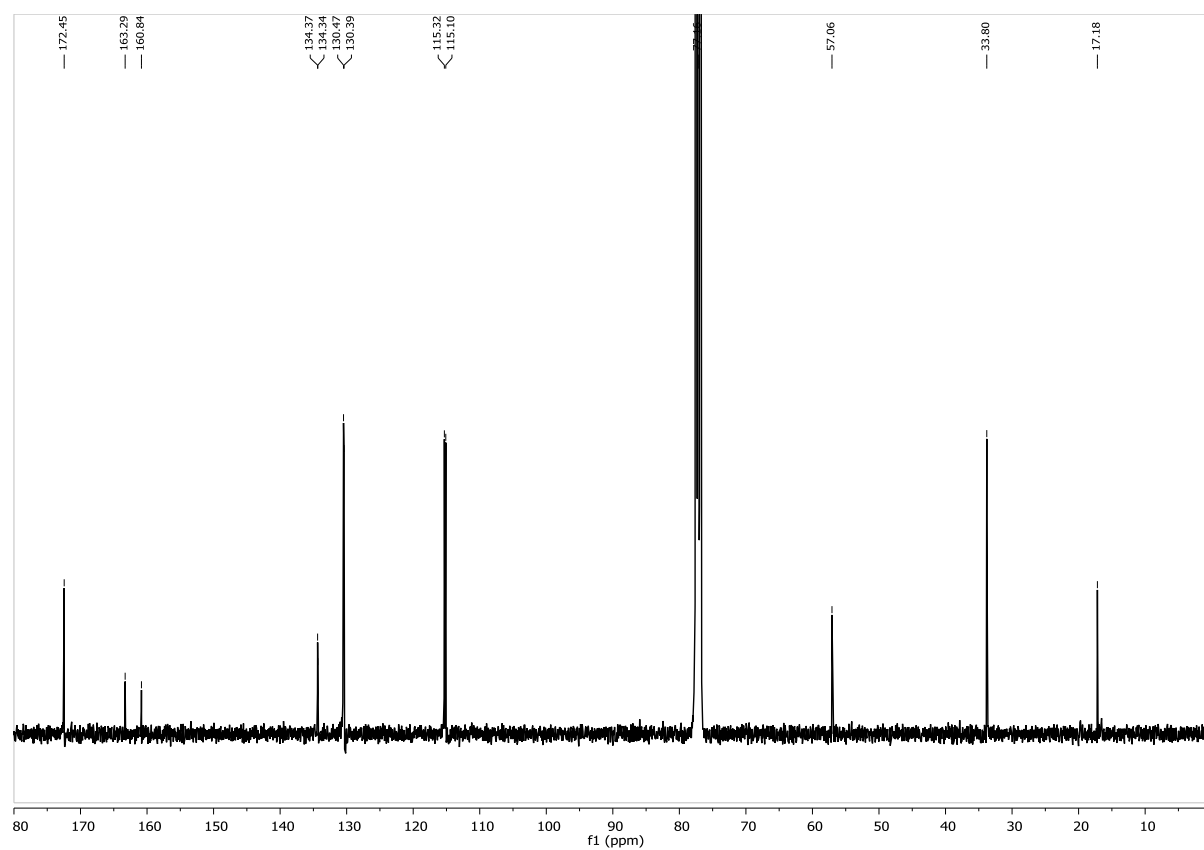

*Supporting Information*

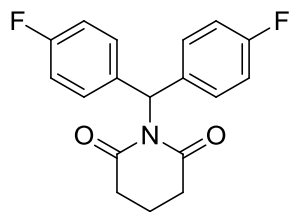

**S5d**

$^{19}\text{F}\{^1\text{H}\}$  NMR, 376 MHz,  $\text{CDCl}_3$

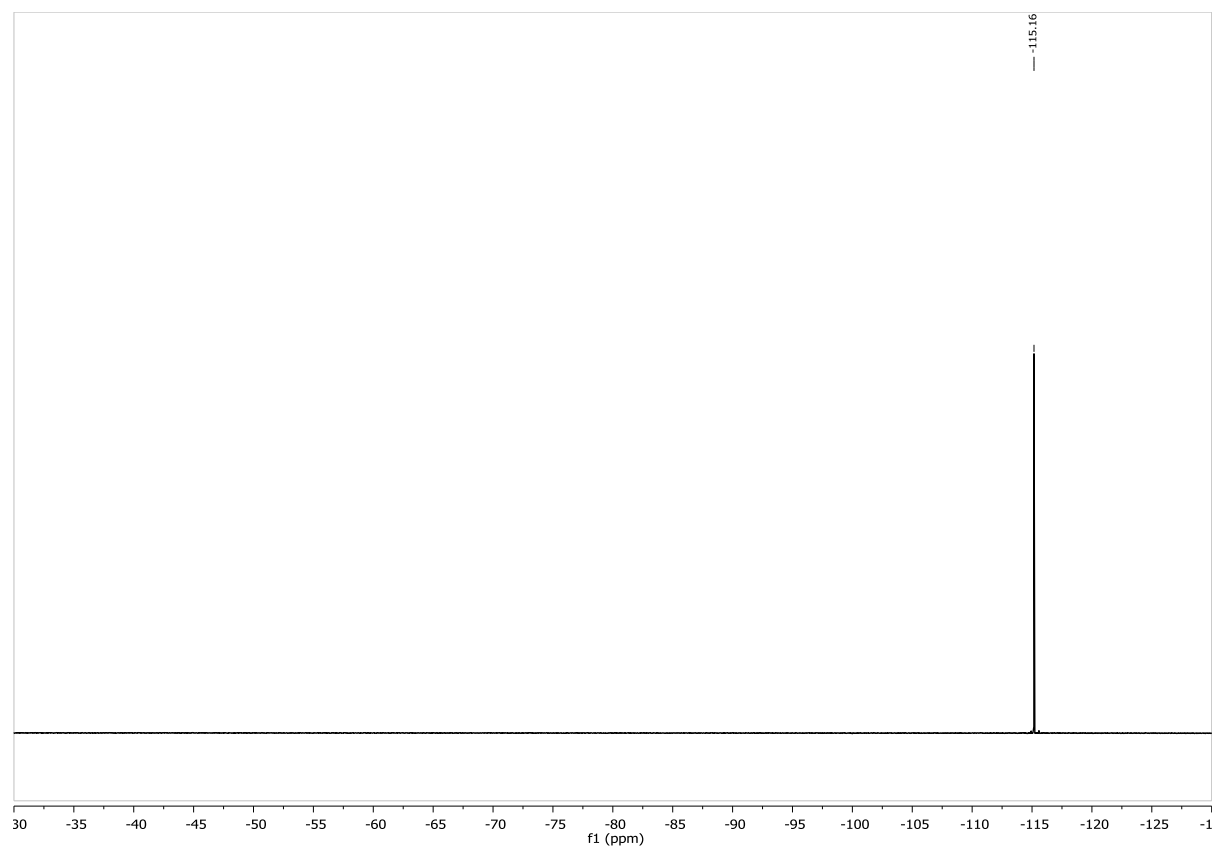



Supporting Information

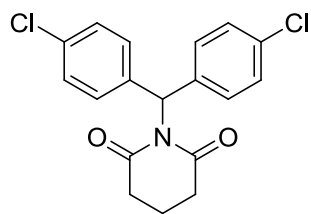

**S5e**

$^1\text{H}$  NMR, 400 MHz,  $\text{CDCl}_3$

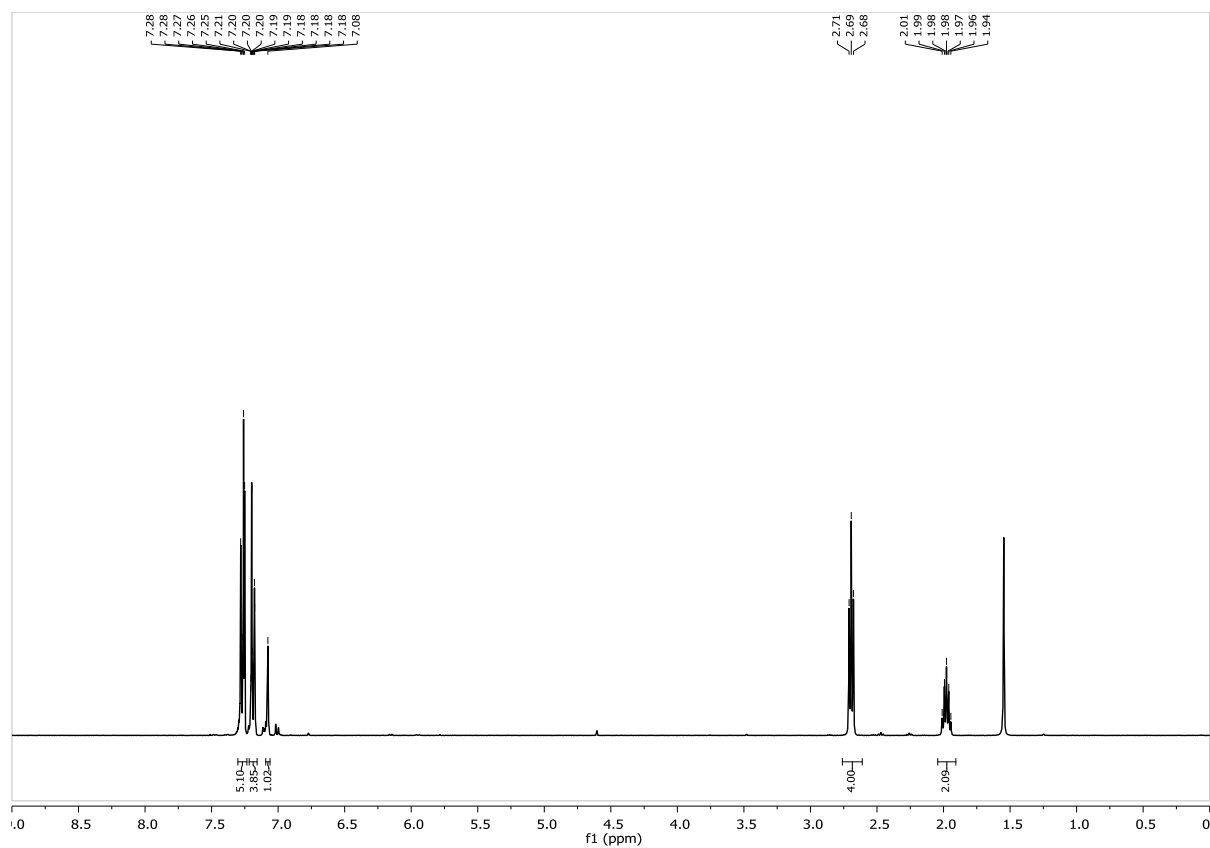

Supporting Information

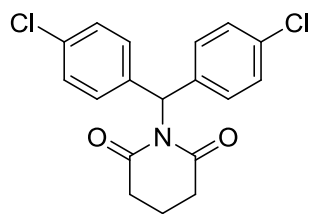

**S5e**

$^{13}\text{C}\{^1\text{H}\}$  NMR, 101 MHz,  $\text{CDCl}_3$

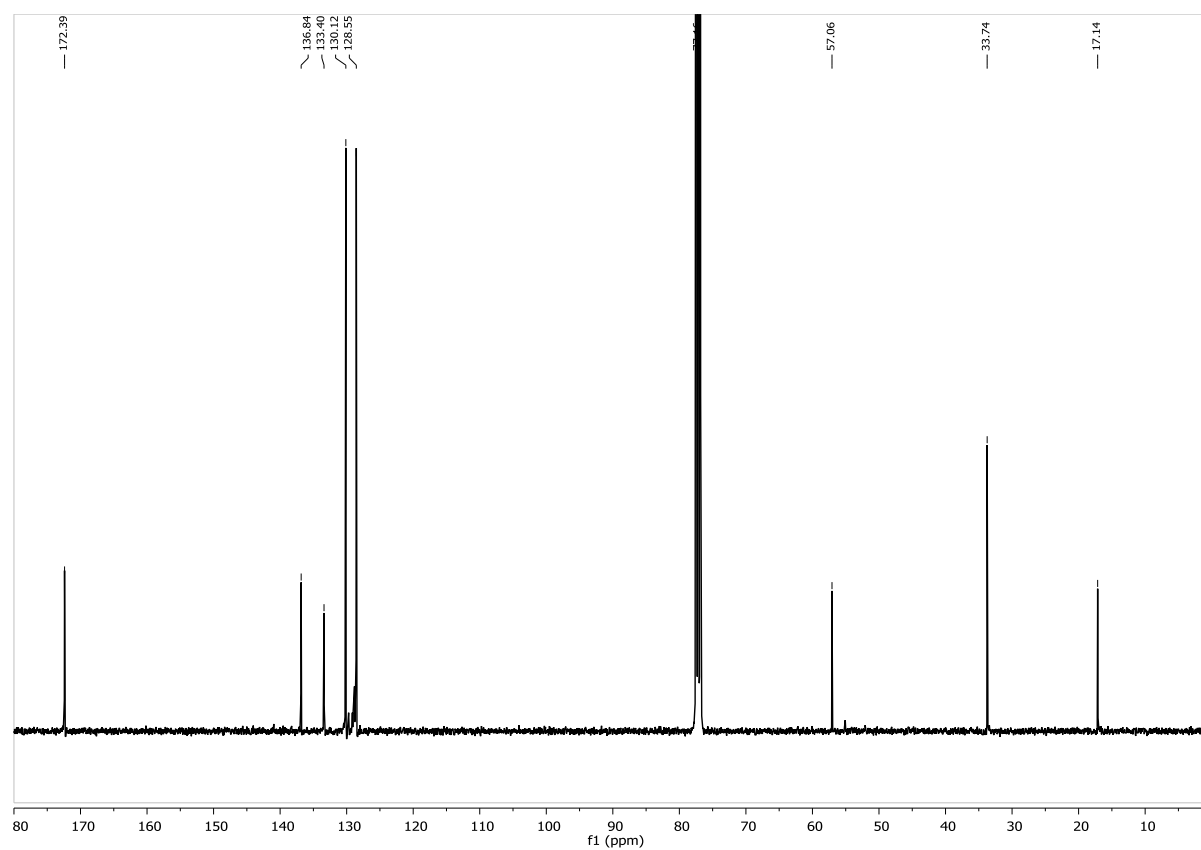

Supporting Information

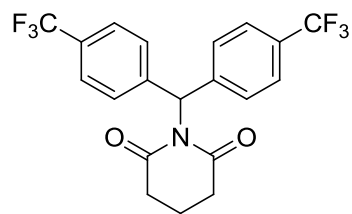

**S5f**

$^1\text{H}$  NMR, 400 MHz,  $\text{CDCl}_3$

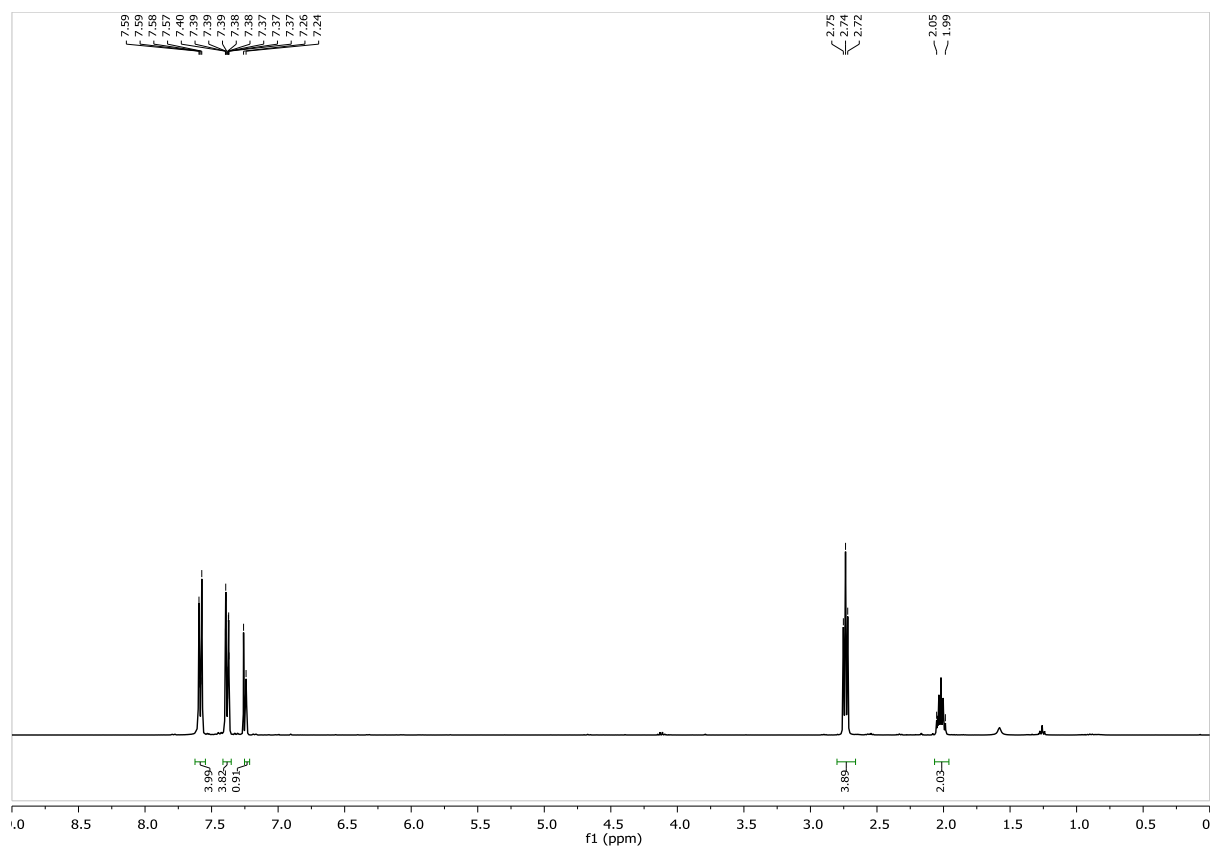

Supporting Information



**S5f**

$^{13}\text{C}\{^1\text{H}\}$  NMR, 101 MHz,  $\text{CDCl}_3$

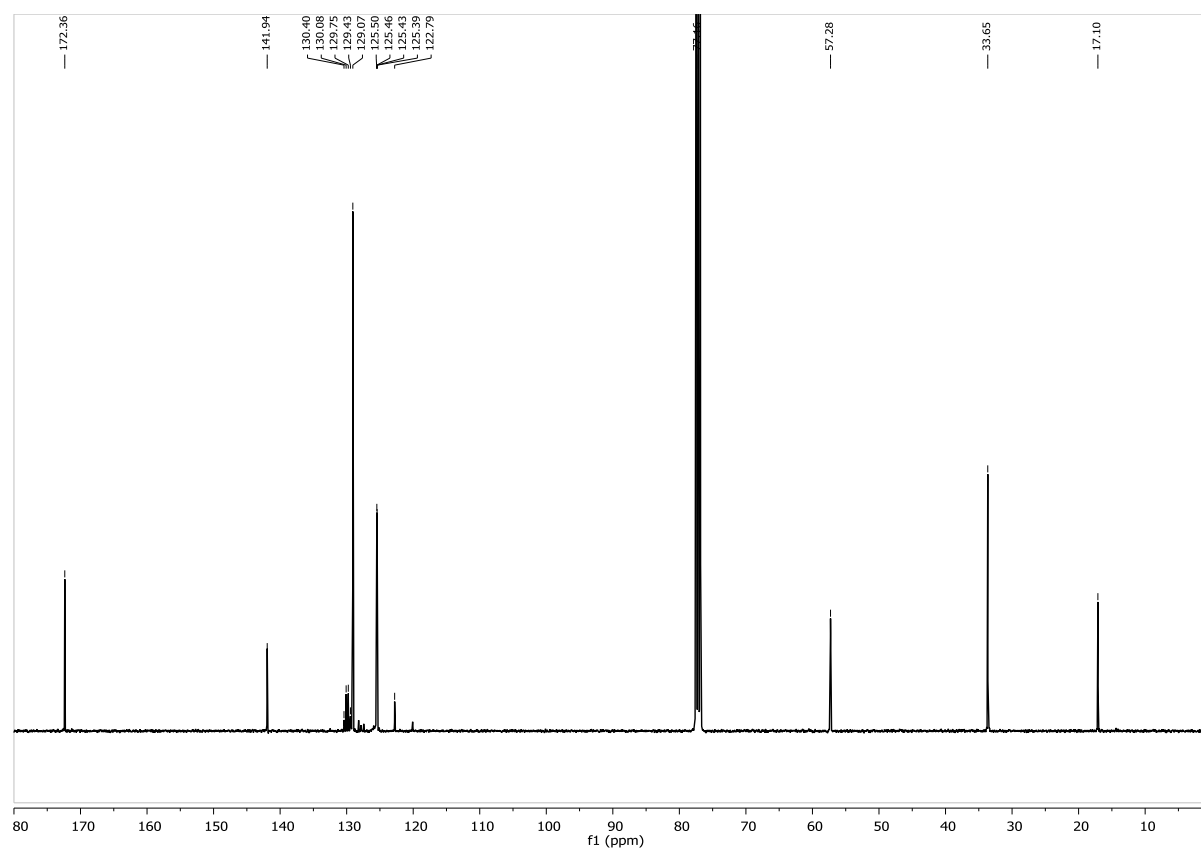

*Supporting Information*



**S5f**

$^{19}\text{F}\{^1\text{H}\}$  NMR, 376 MHz,  $\text{CDCl}_3$

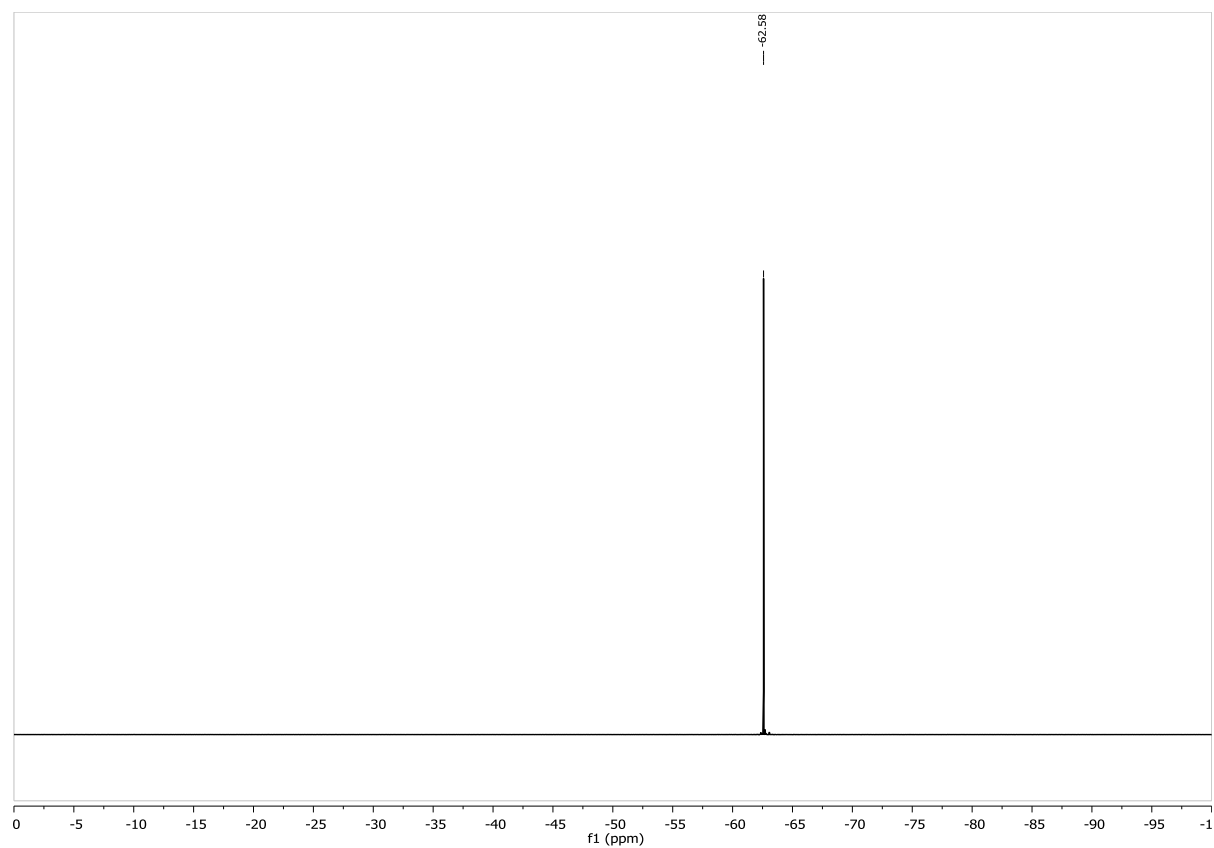

Supporting Information

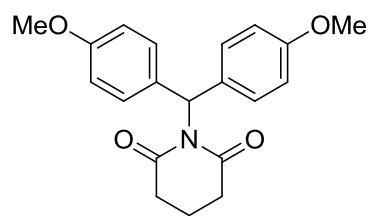

**S5g**

$^1\text{H}$  NMR, 400 MHz,  $\text{CDCl}_3$

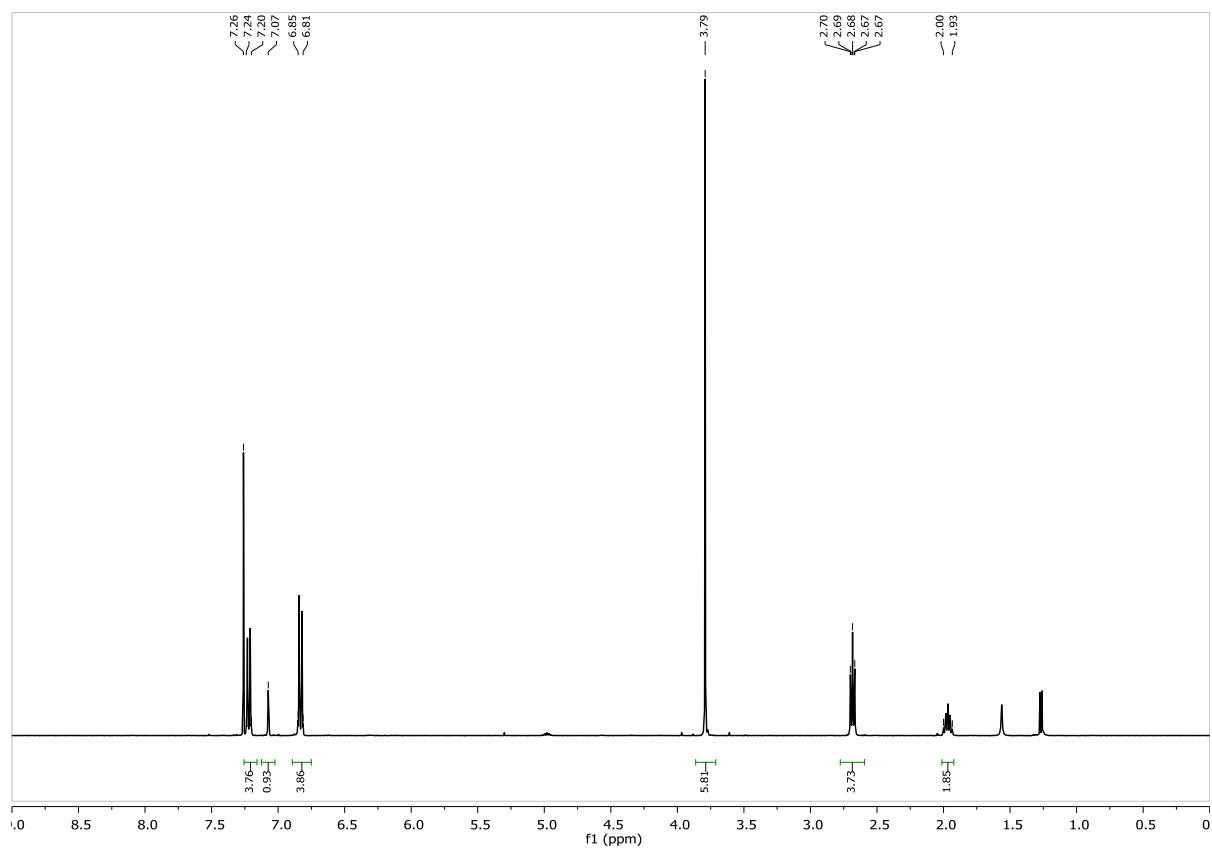

Supporting Information



**S5g**

$^{13}\text{C}\{^1\text{H}\}$  NMR, 101 MHz,  $\text{CDCl}_3$

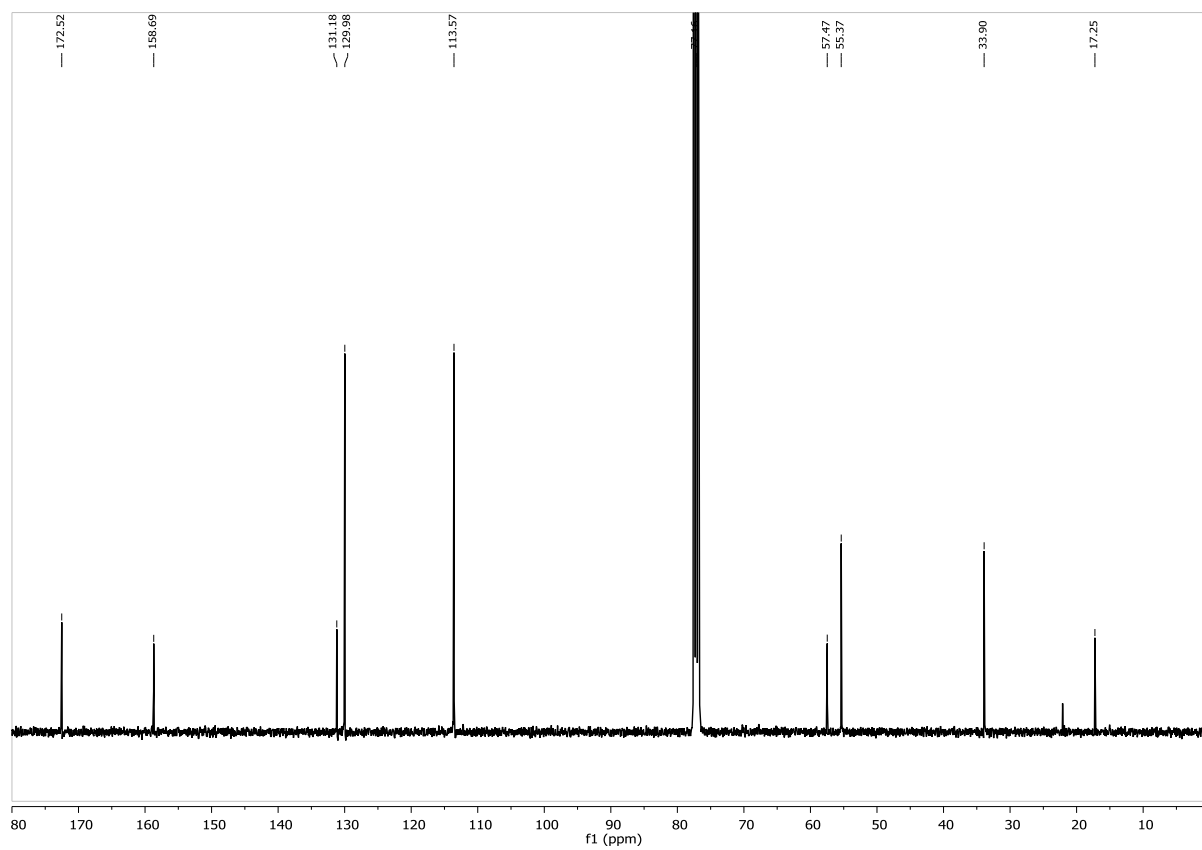

Supporting Information

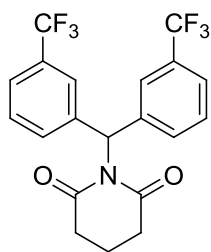

**S5h**

$^1\text{H}$  NMR, 400 MHz,  $\text{CDCl}_3$

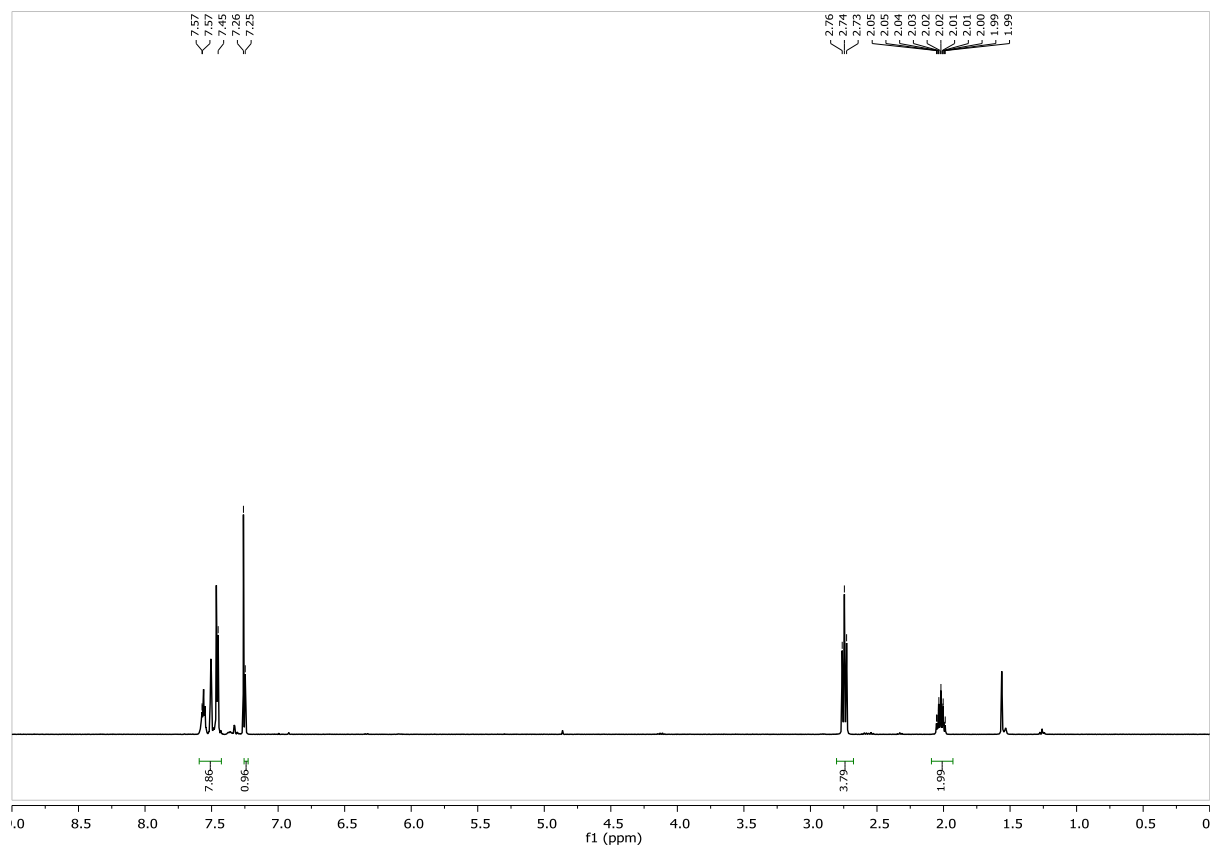



Supporting Information

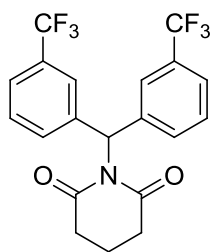

**S5h**

$^{13}\text{C}\{^1\text{H}\}$  NMR, 101 MHz,  $\text{CDCl}_3$

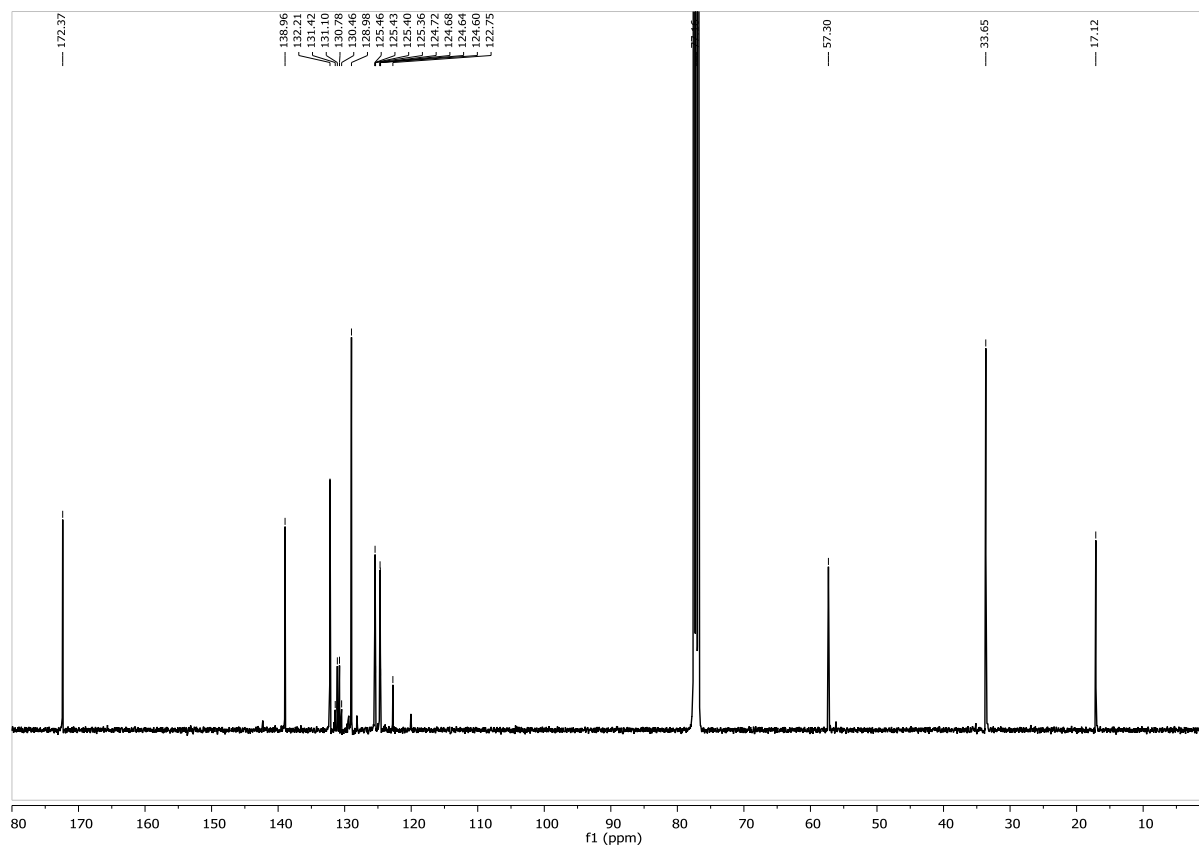

*Supporting Information*

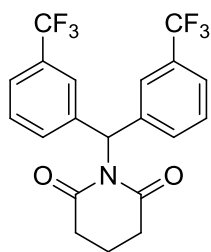

**S5h**

$^{19}\text{F}\{^1\text{H}\}$  NMR, 376 MHz,  $\text{CDCl}_3$

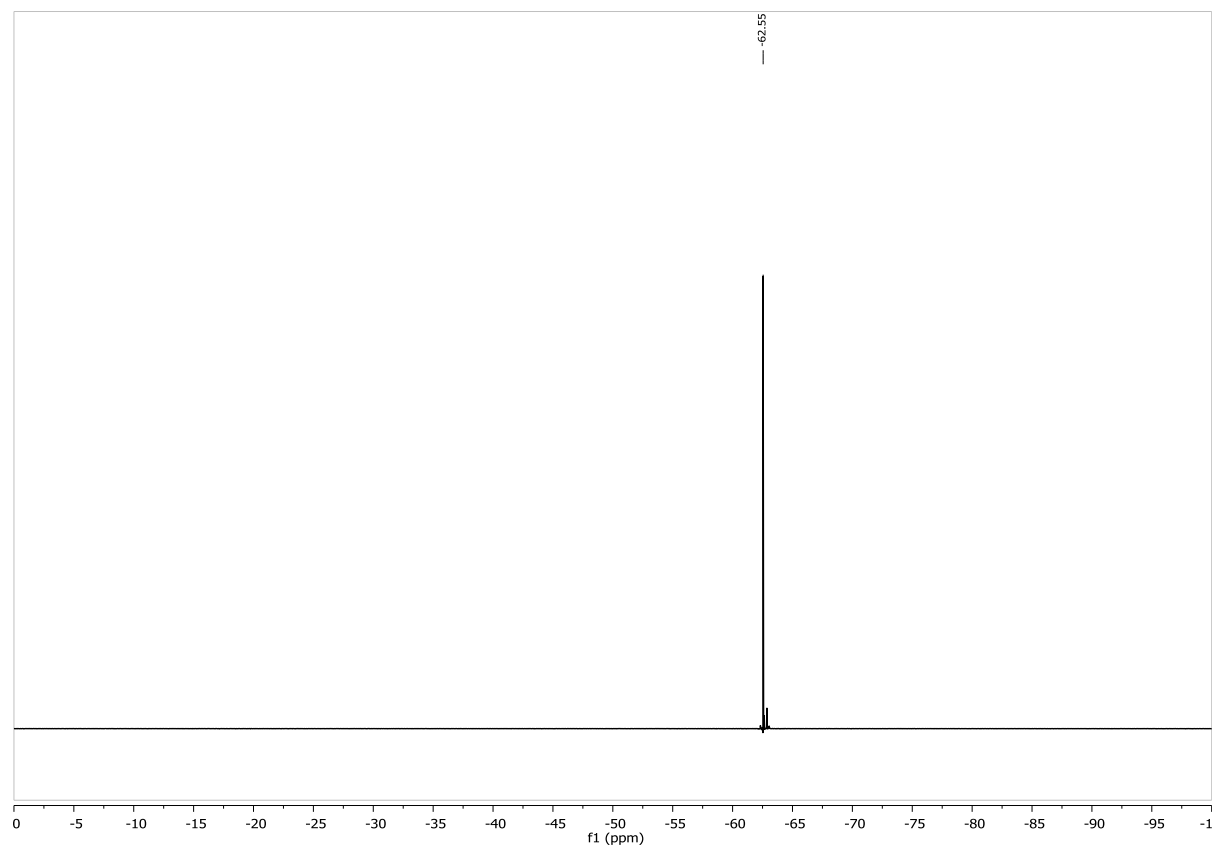

Supporting Information

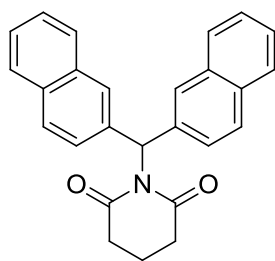

**S5i**

$^1\text{H}$  NMR, 400 MHz,  $\text{CDCl}_3$

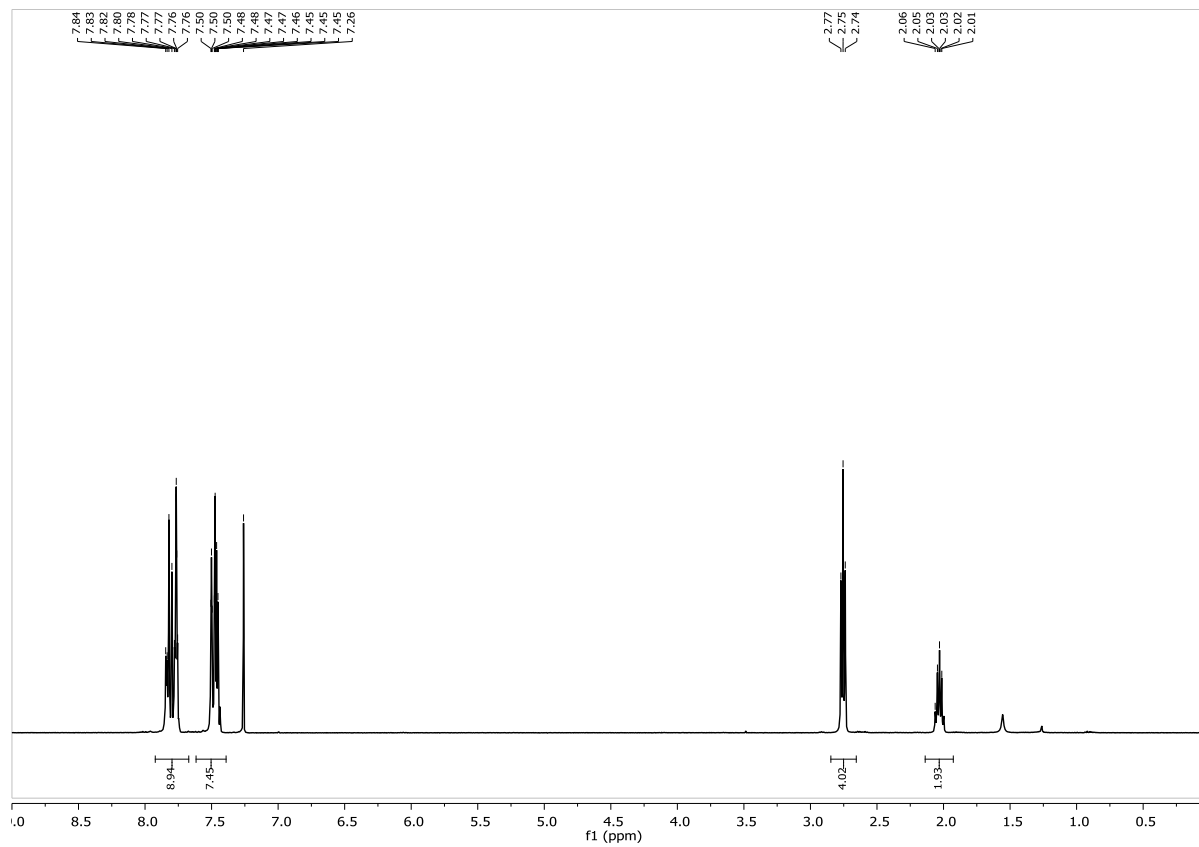

Supporting Information

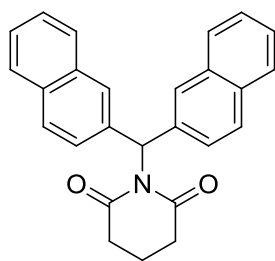

**S5i**

$^{13}\text{C}\{^1\text{H}\}$  NMR, 101 MHz,  $\text{CDCl}_3$

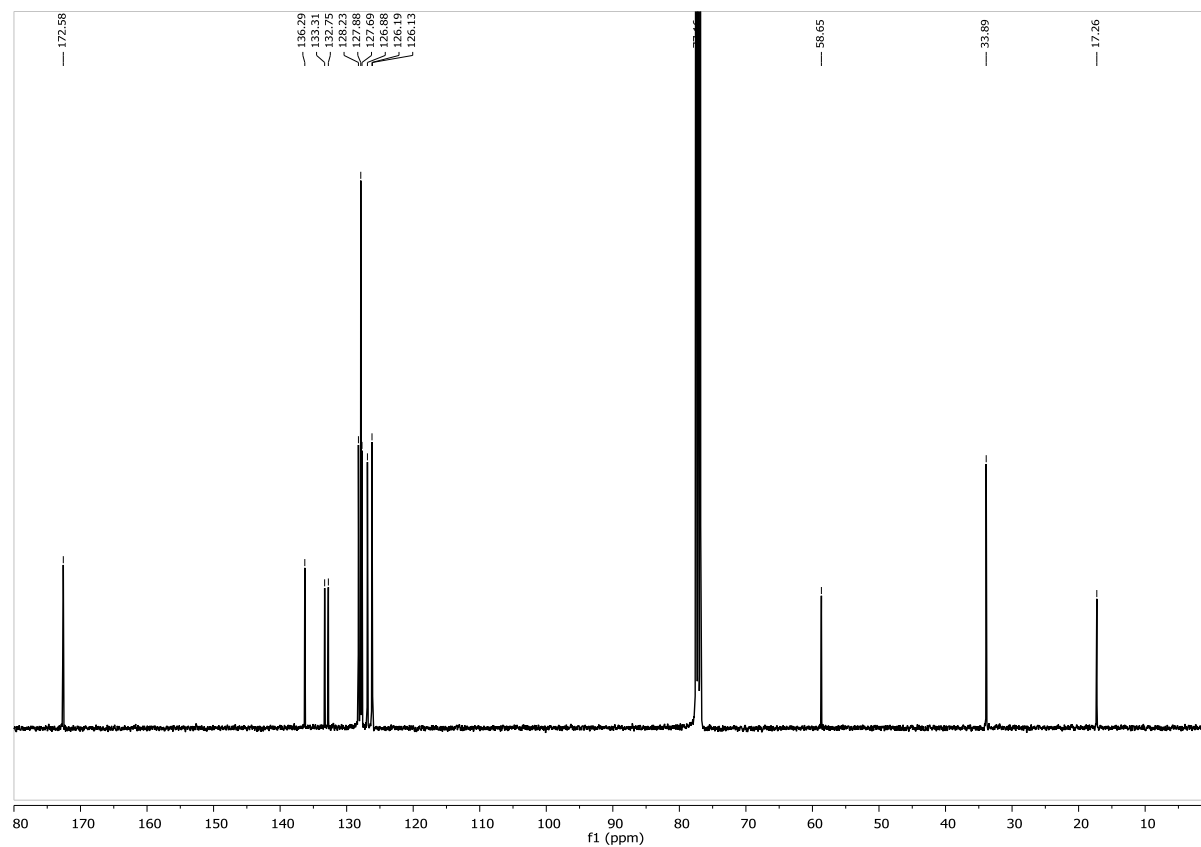

Supporting Information

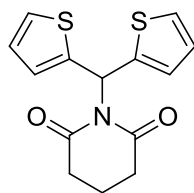

**S5j**

$^1\text{H}$  NMR, 400 MHz,  $\text{C}_6\text{D}_6$

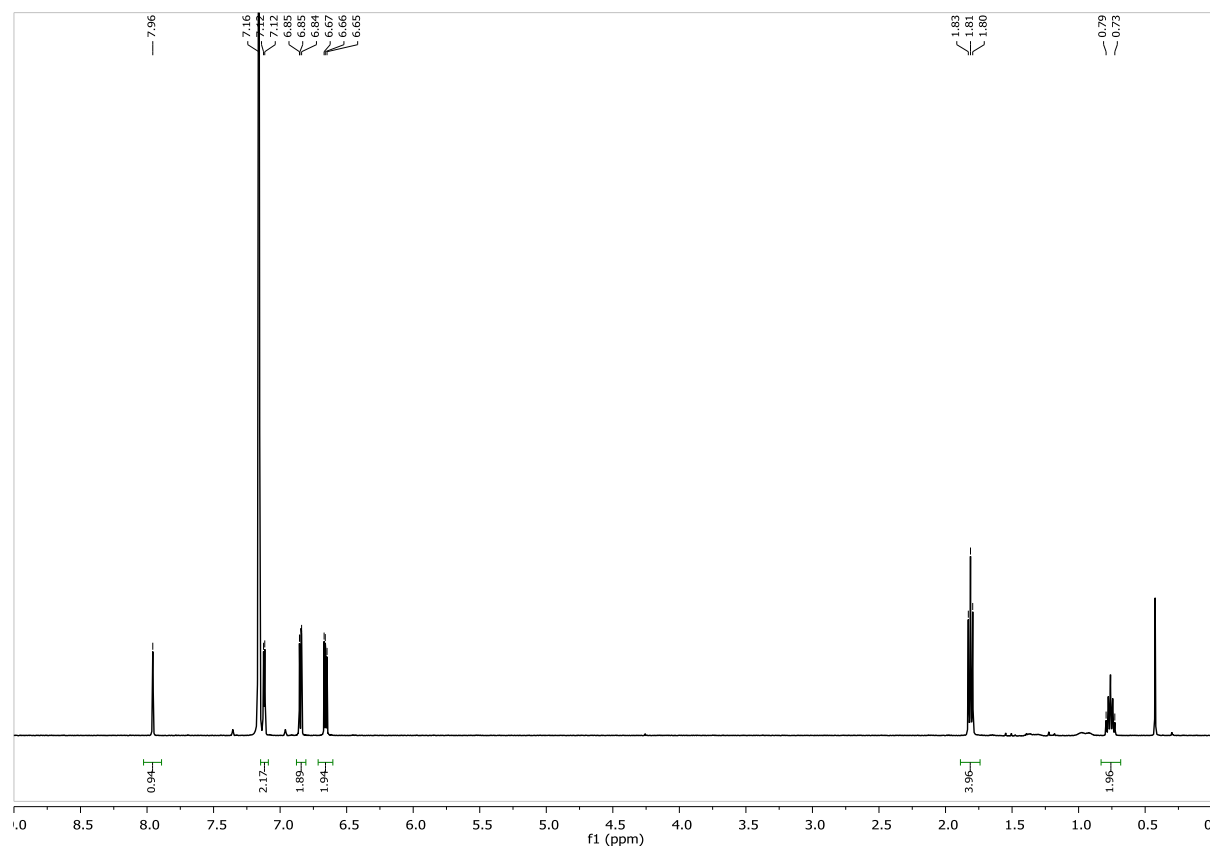

Supporting Information

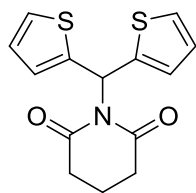

**S5j**

$^{13}\text{C}\{^1\text{H}\}$  NMR, 151 MHz,  $\text{C}_6\text{D}_6$

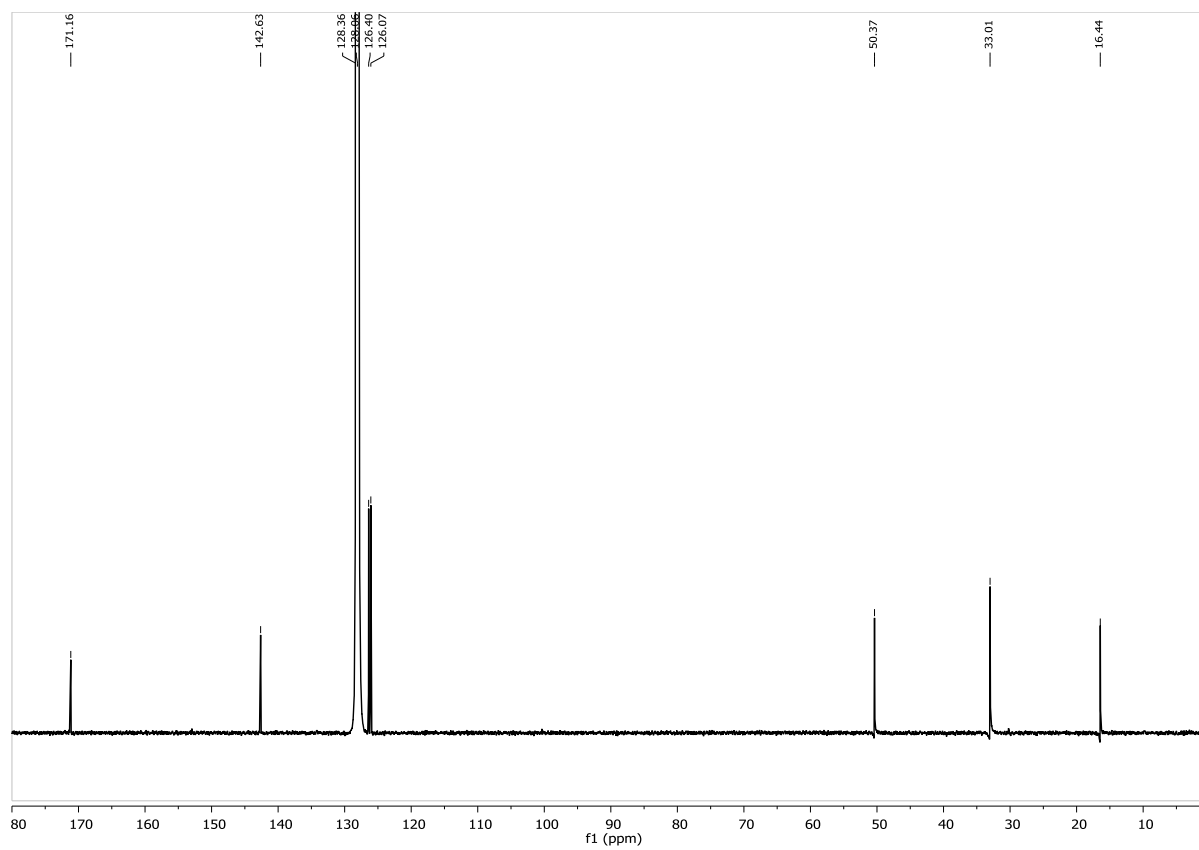

Supporting Information

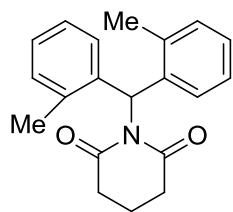

**S5k**

$^1\text{H}$  NMR, 400 MHz,  $\text{CDCl}_3$

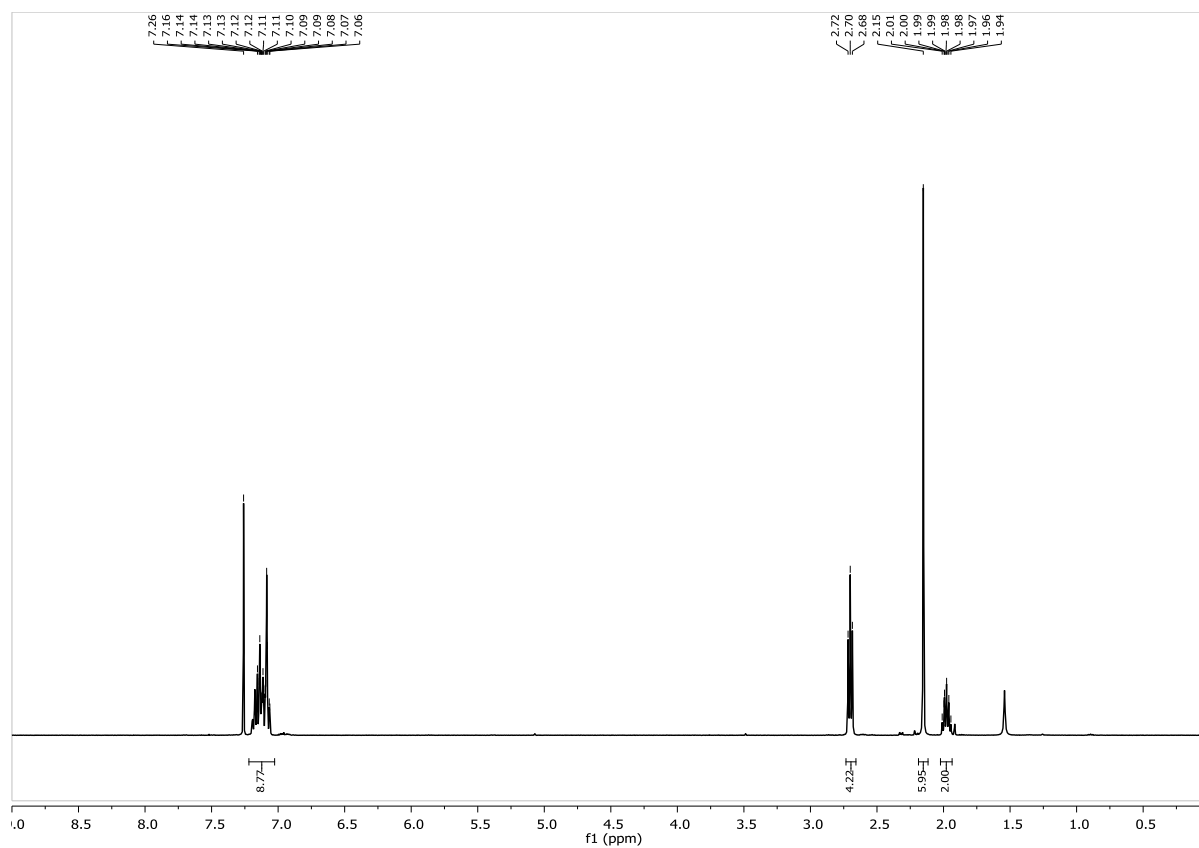

Supporting Information

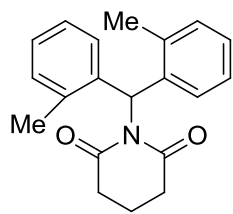

**S5k**

$^{13}\text{C}\{^1\text{H}\}$  NMR, 101 MHz,  $\text{CDCl}_3$

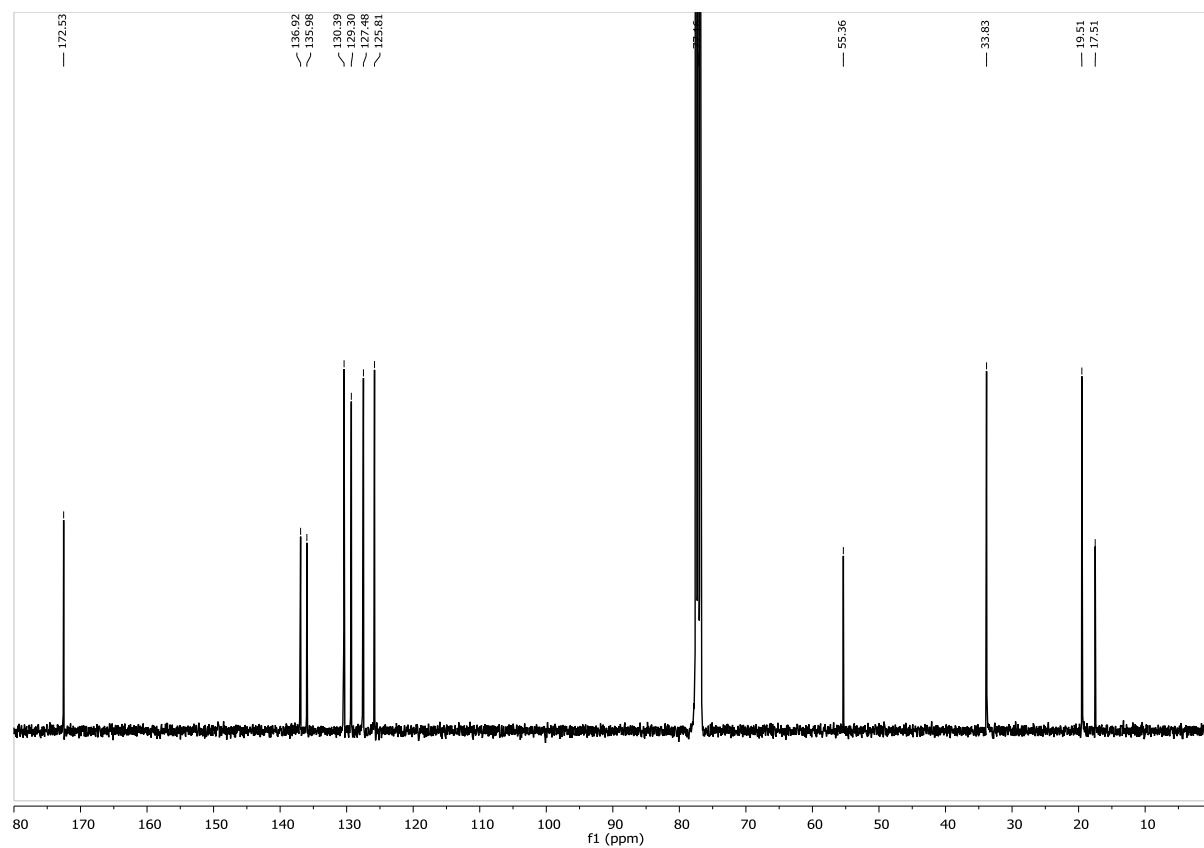



Supporting Information

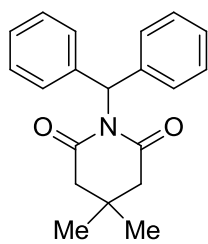

**S5I**

$^1\text{H}$  NMR, 400 MHz,  $\text{CDCl}_3$

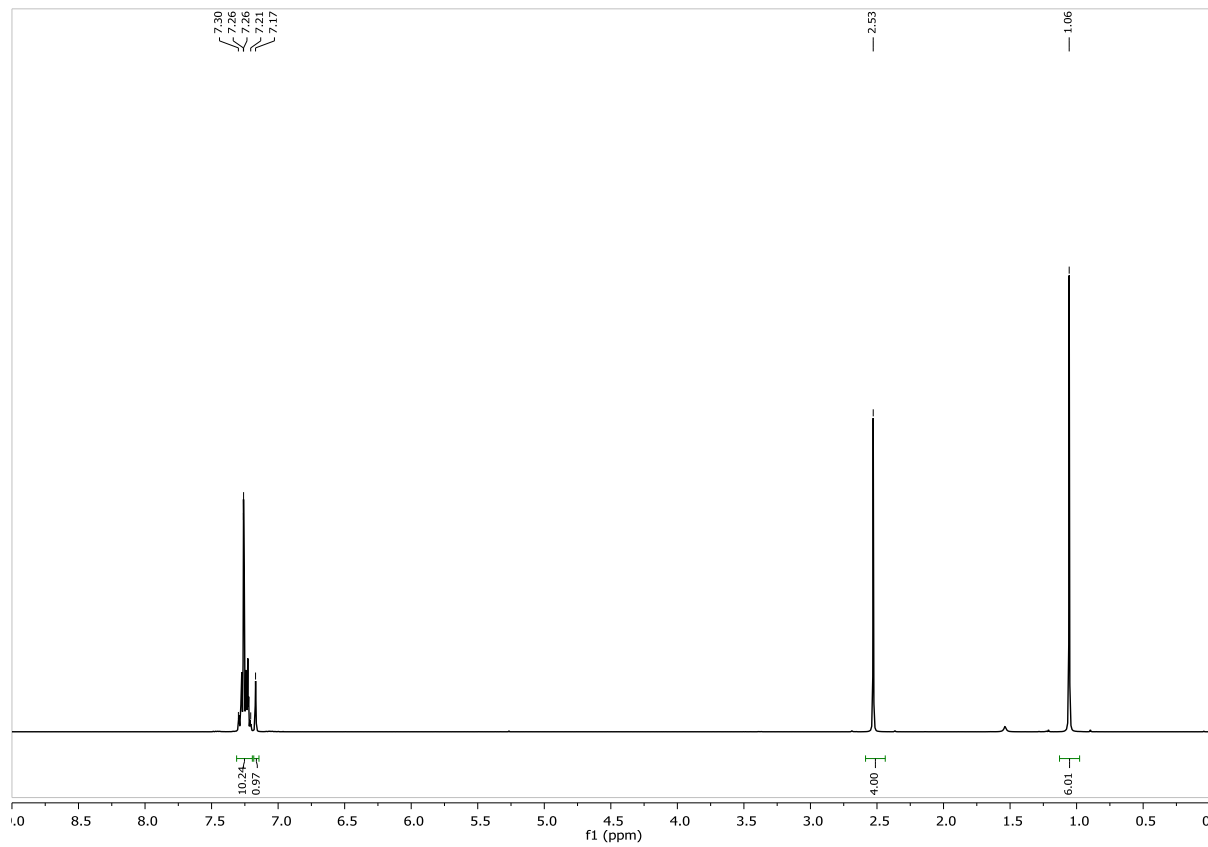

Supporting Information

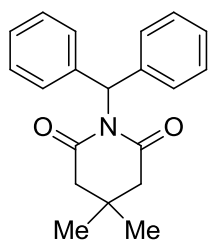

$^{13}\text{C}\{^1\text{H}\}$  NMR, 101 MHz,  $\text{CDCl}_3$

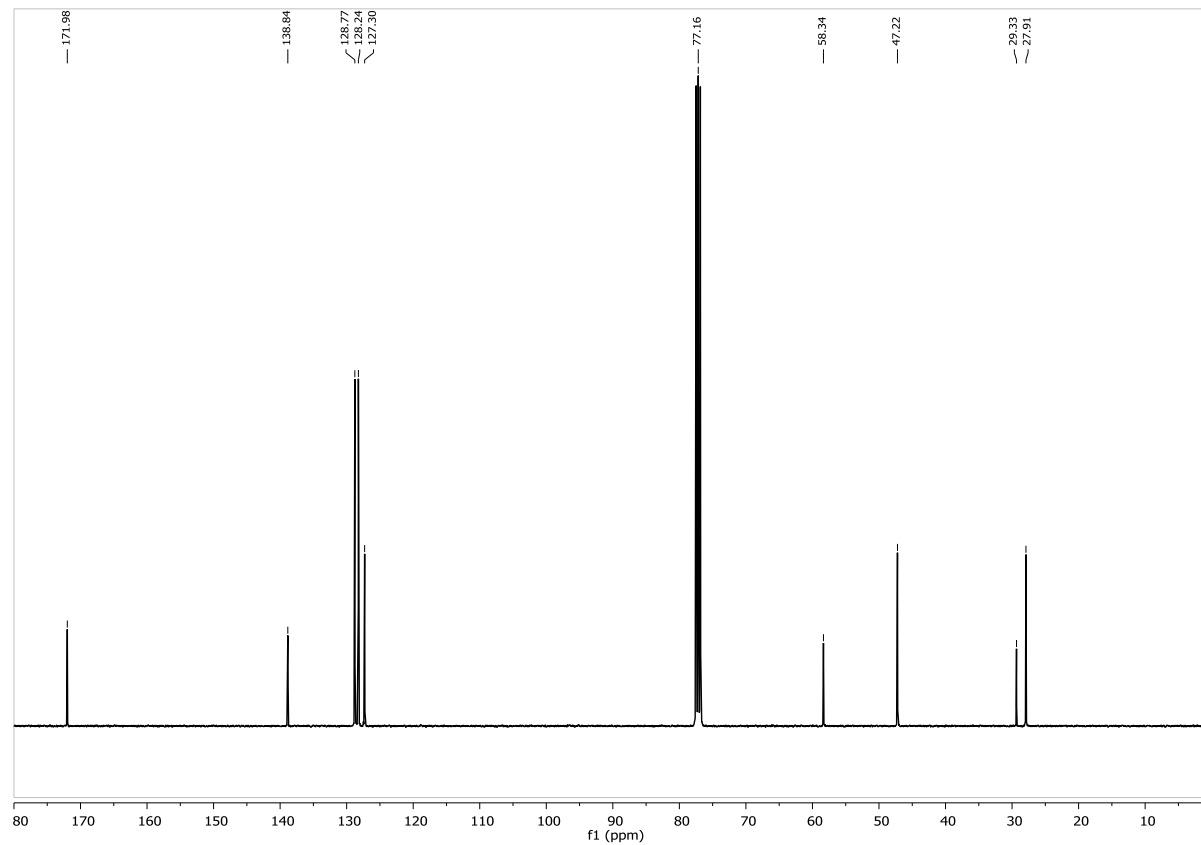

Supporting Information

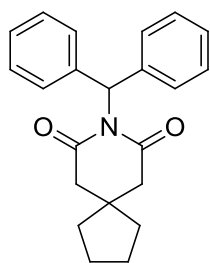

**S5m**

$^1\text{H}$  NMR, 400 MHz,  $\text{CDCl}_3$

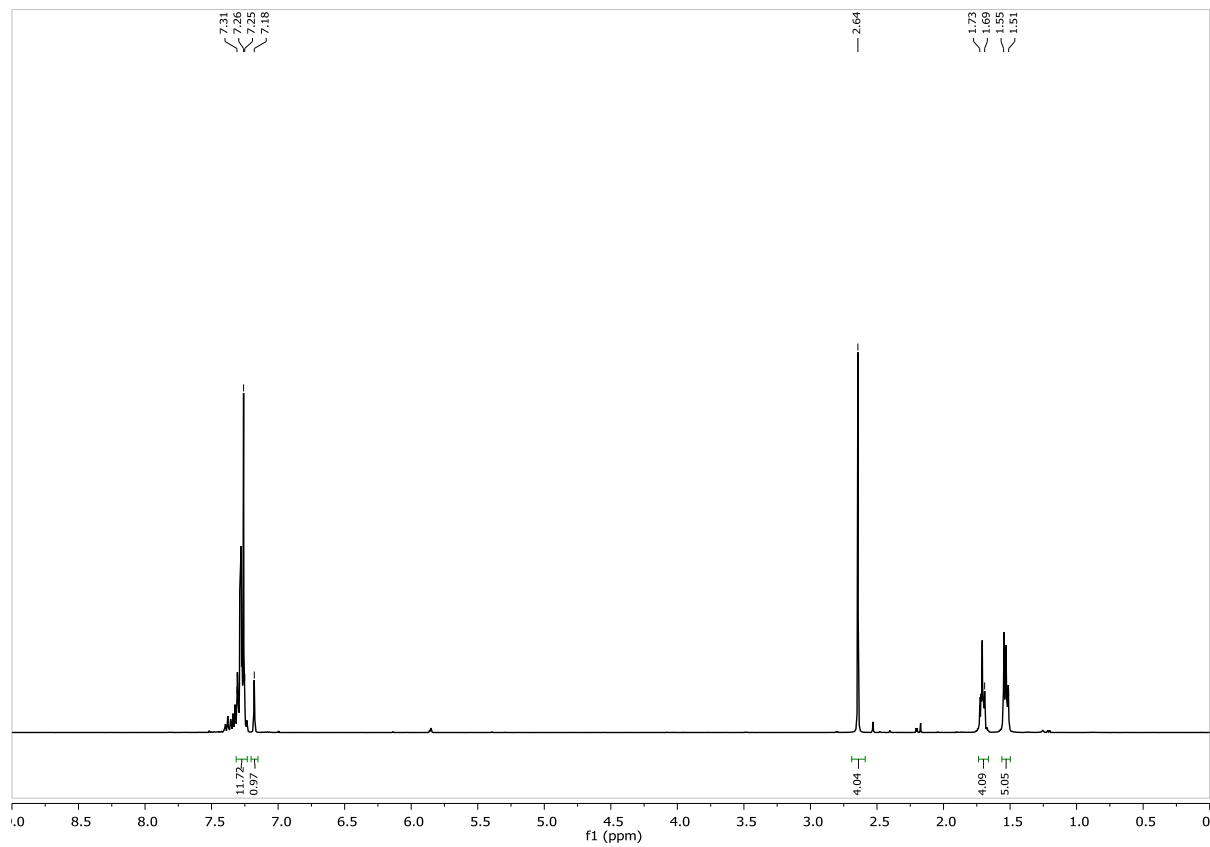

Supporting Information



**S5m**

$^{13}\text{C}\{^1\text{H}\}$  NMR, 101 MHz,  $\text{CDCl}_3$

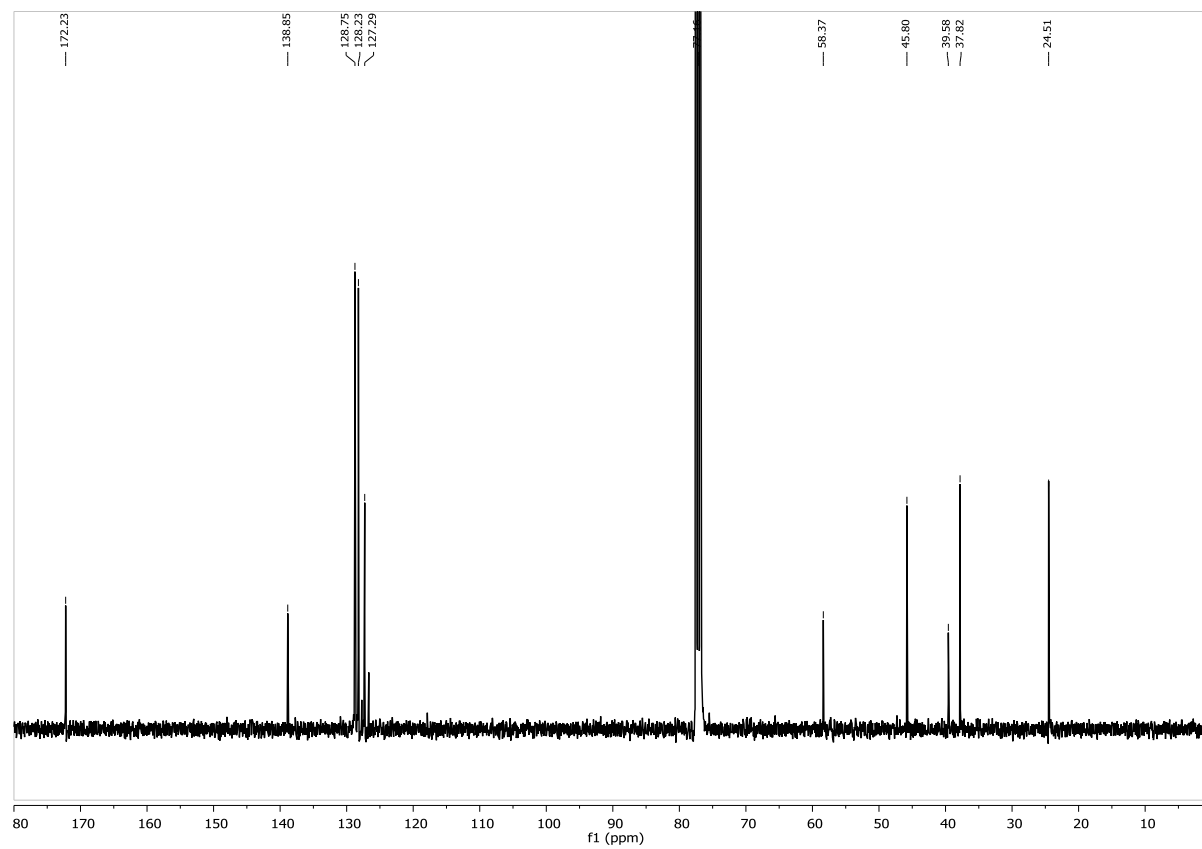

Supporting Information

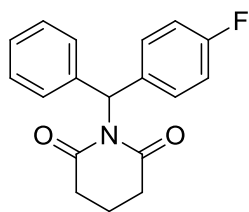

**S5n**

$^1\text{H}$  NMR, 400 MHz,  $\text{CDCl}_3$

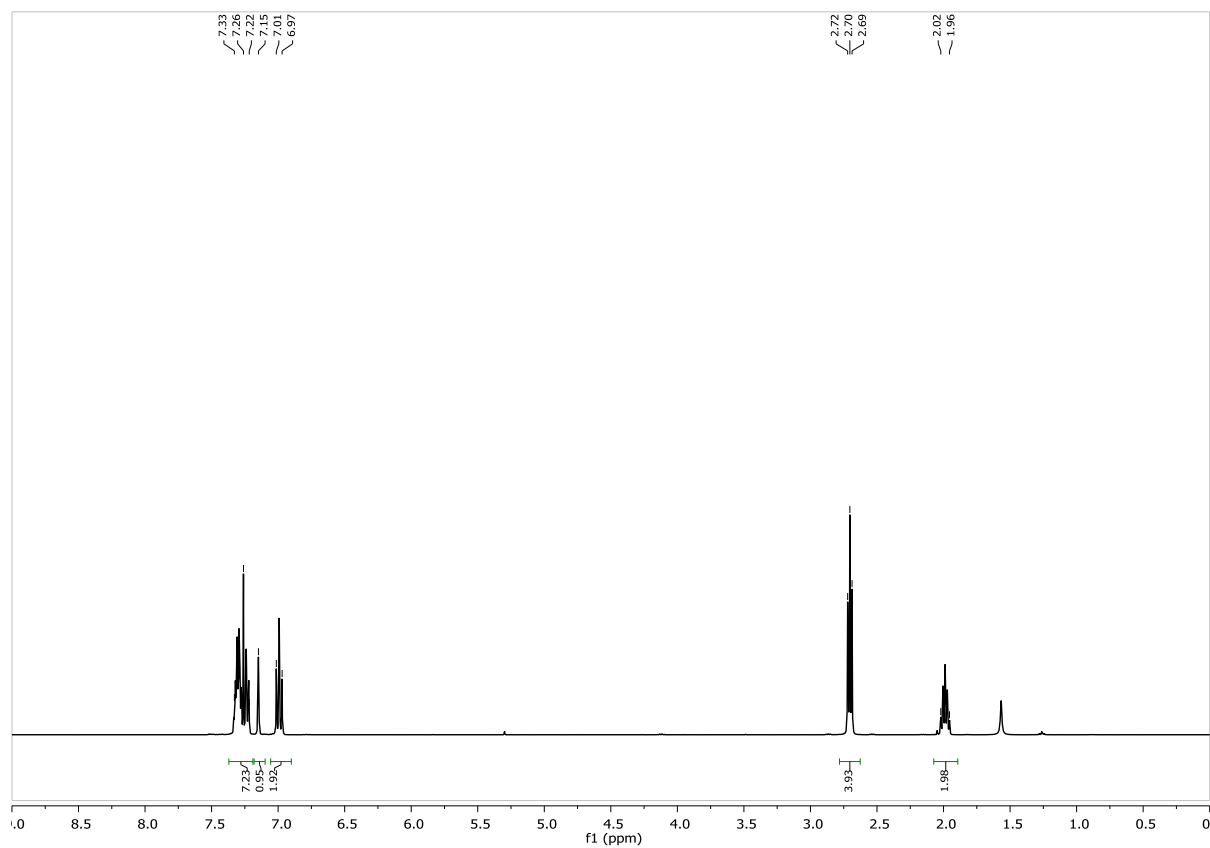

Supporting Information



**S5n**

$^{13}\text{C}\{^1\text{H}\}$  NMR, 101 MHz,  $\text{CDCl}_3$

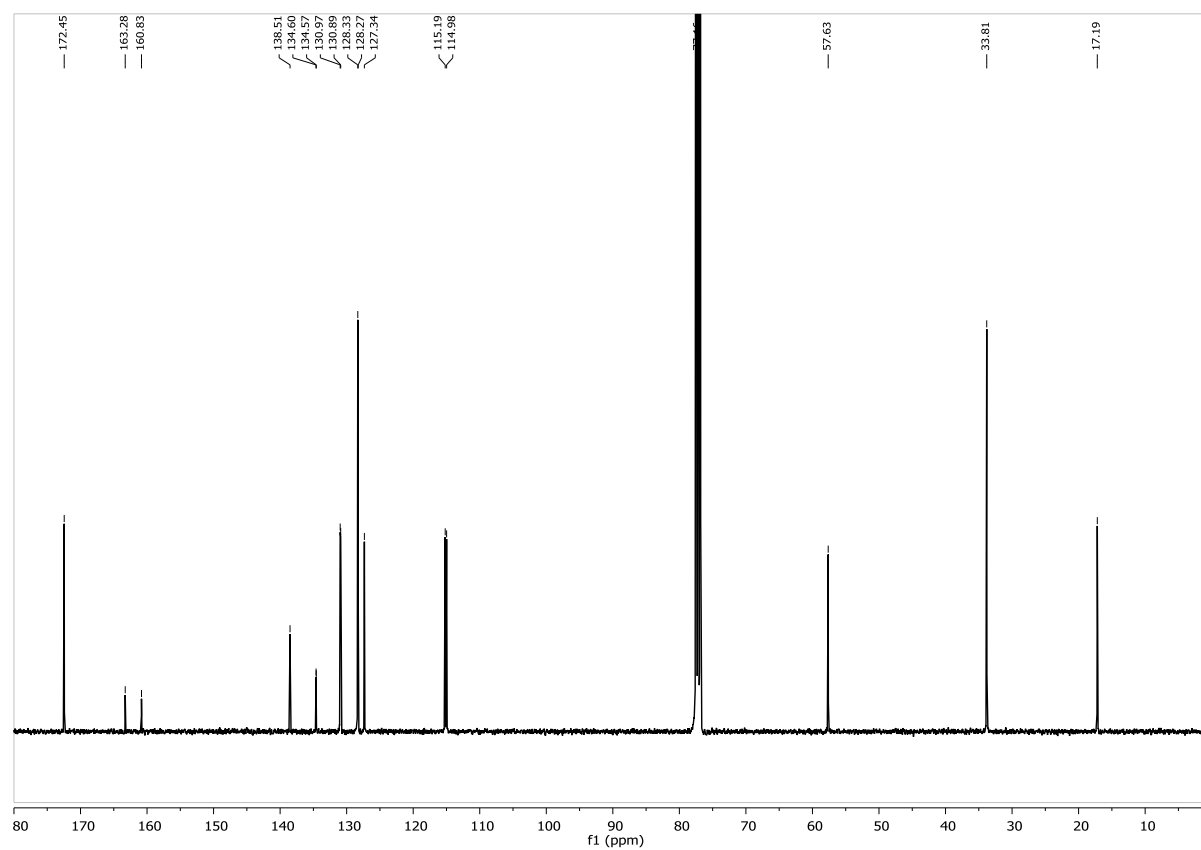

*Supporting Information*



**S5n**

$^{19}\text{F}\{^1\text{H}\}$  NMR, 376 MHz,  $\text{CDCl}_3$

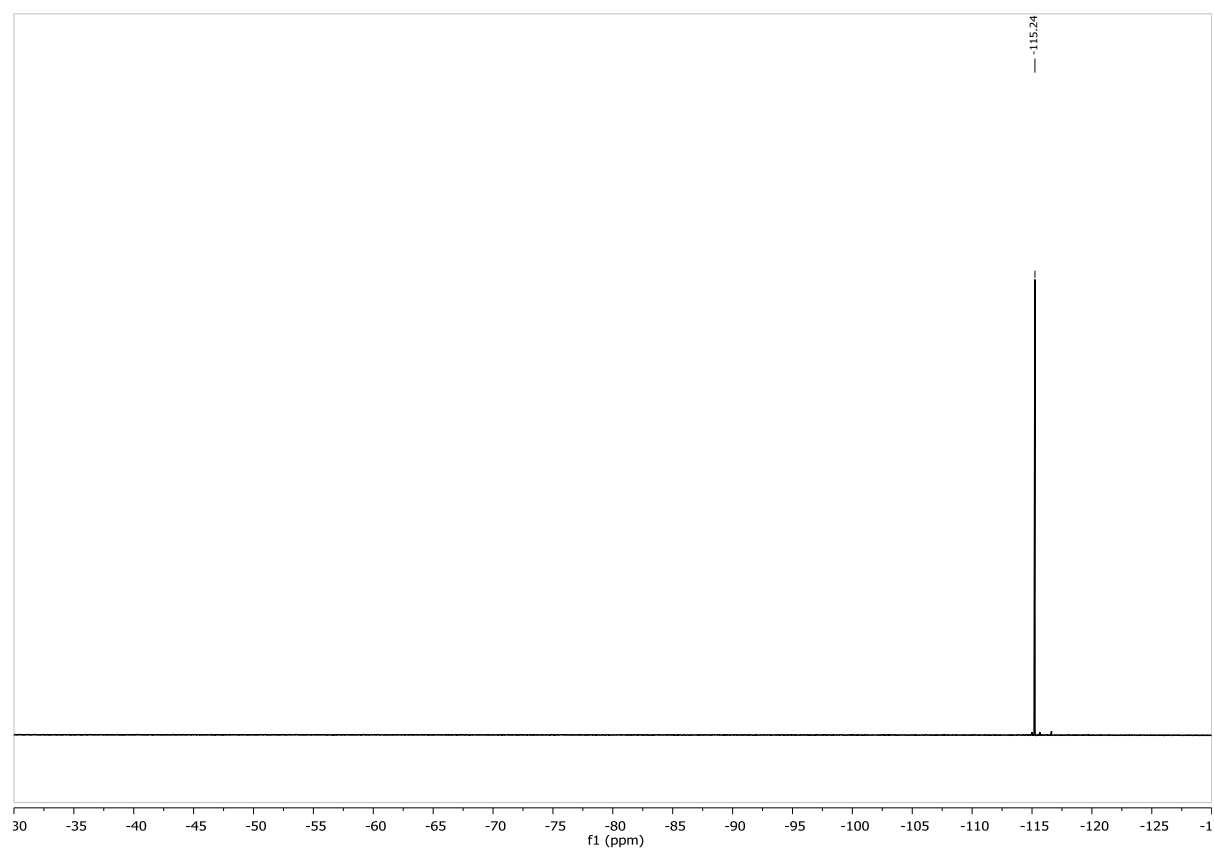

Supporting Information

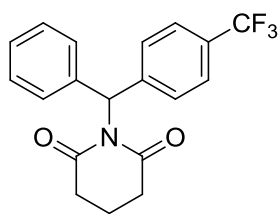

**S5o**

$^1\text{H}$  NMR, 400 MHz,  $\text{CDCl}_3$

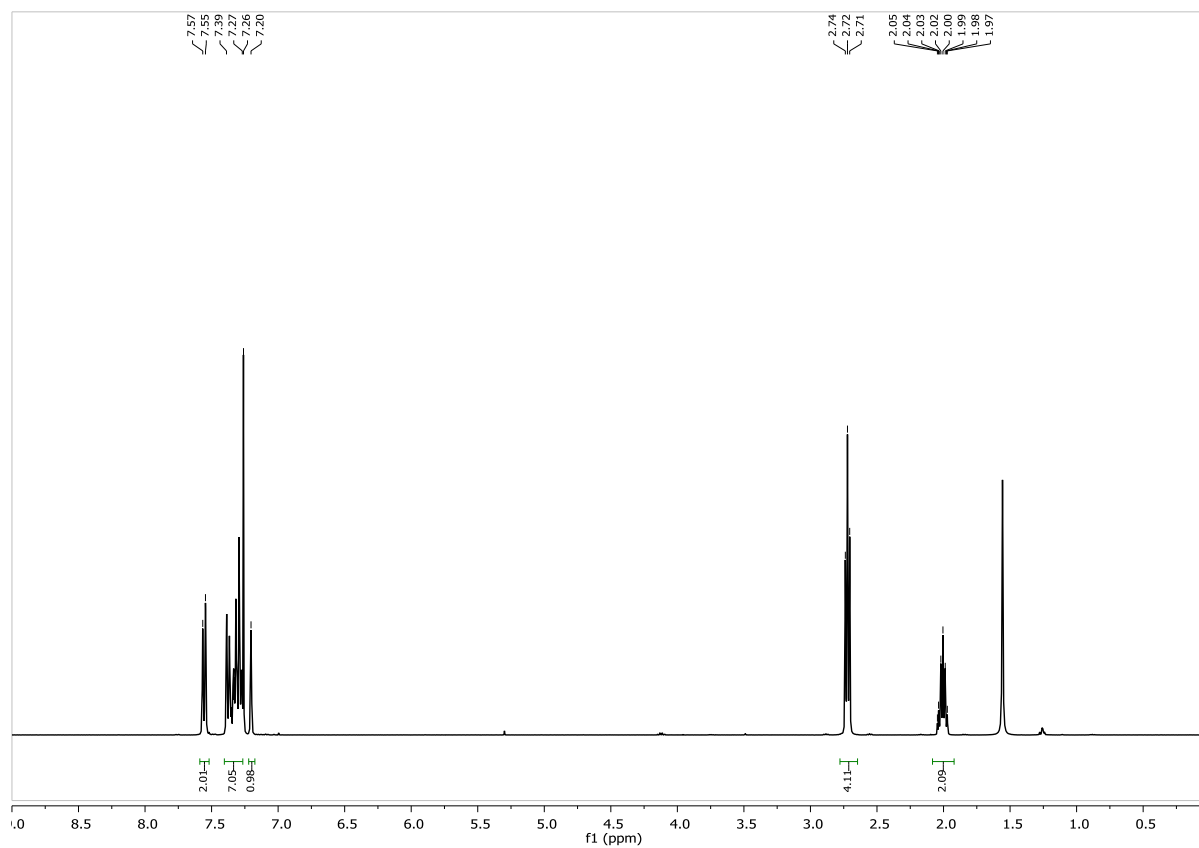



Supporting Information

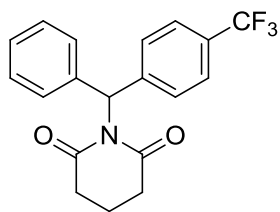

**S5o**

$^{13}\text{C}\{^1\text{H}\}$  NMR, 101 MHz,  $\text{CDCl}_3$

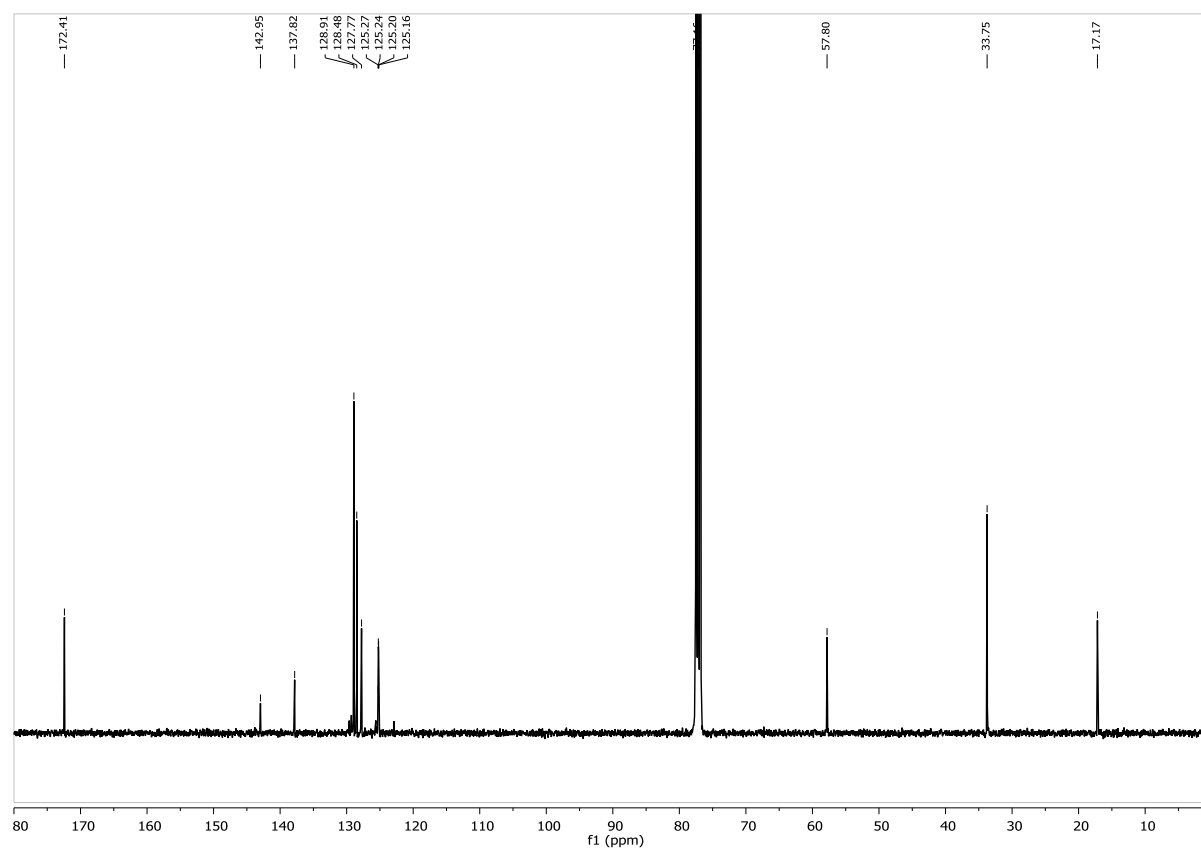

*Supporting Information*



**S5o**

$^{19}\text{F}\{^1\text{H}\}$  NMR, 376 MHz,  $\text{CDCl}_3$

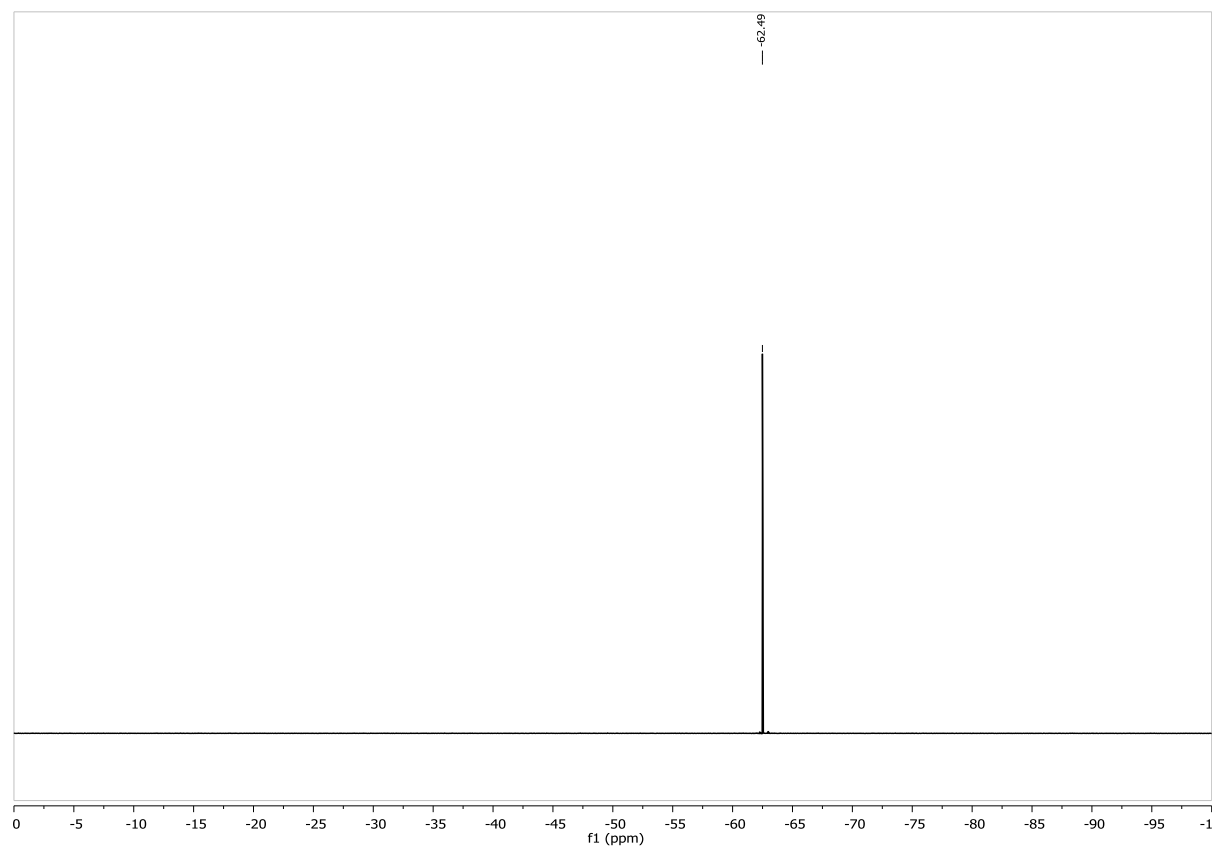

Supporting Information

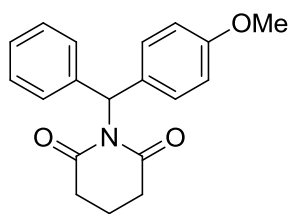

**S5p**

$^1\text{H}$  NMR, 400 MHz,  $\text{CDCl}_3$

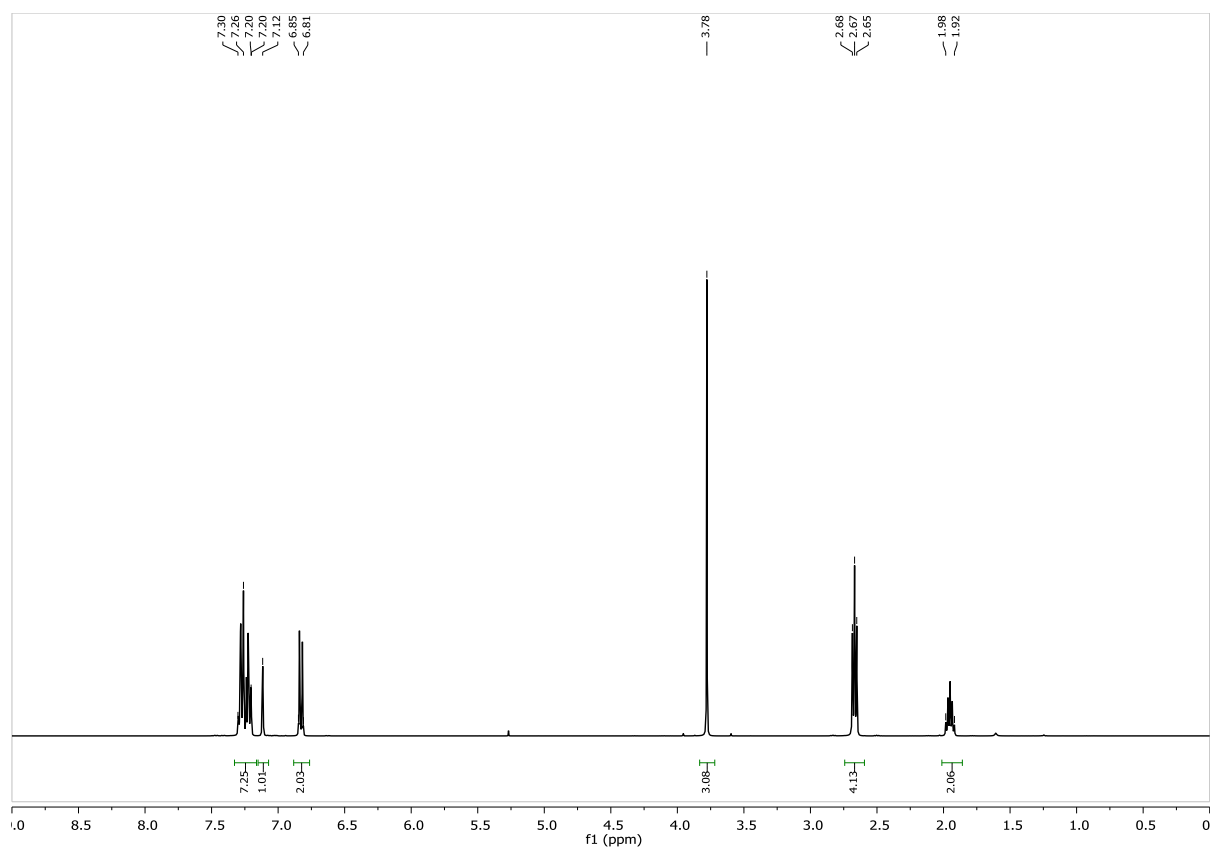

Supporting Information

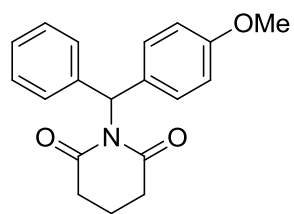

**S5p**

$^{13}\text{C}\{^1\text{H}\}$  NMR, 101 MHz,  $\text{CDCl}_3$

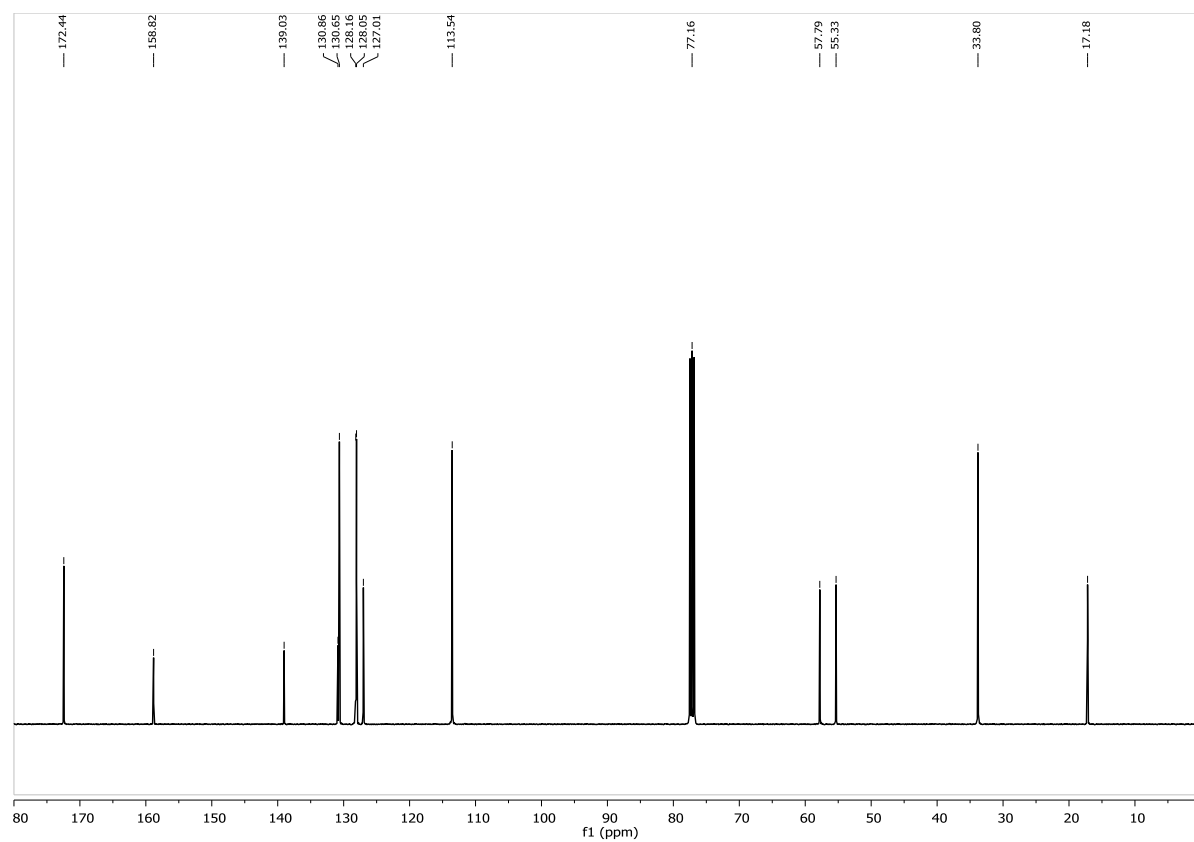

Supporting Information

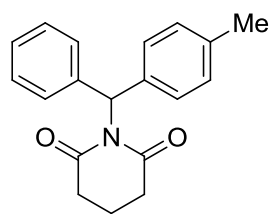

**S5r**

$^1\text{H}$  NMR, 400 MHz,  $\text{CDCl}_3$

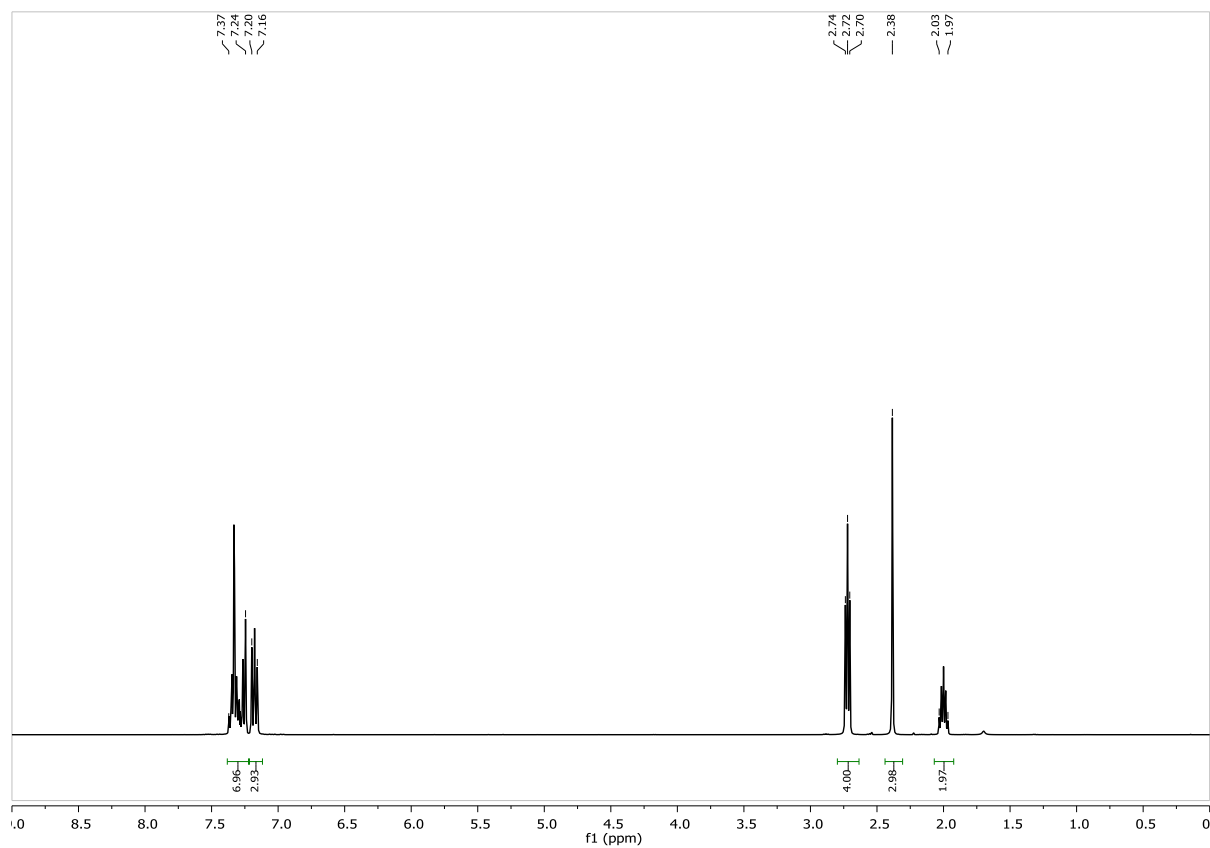

Supporting Information

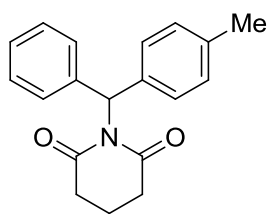

**S5r**

$^{13}\text{C}\{^1\text{H}\}$  NMR, 101 MHz,  $\text{CDCl}_3$

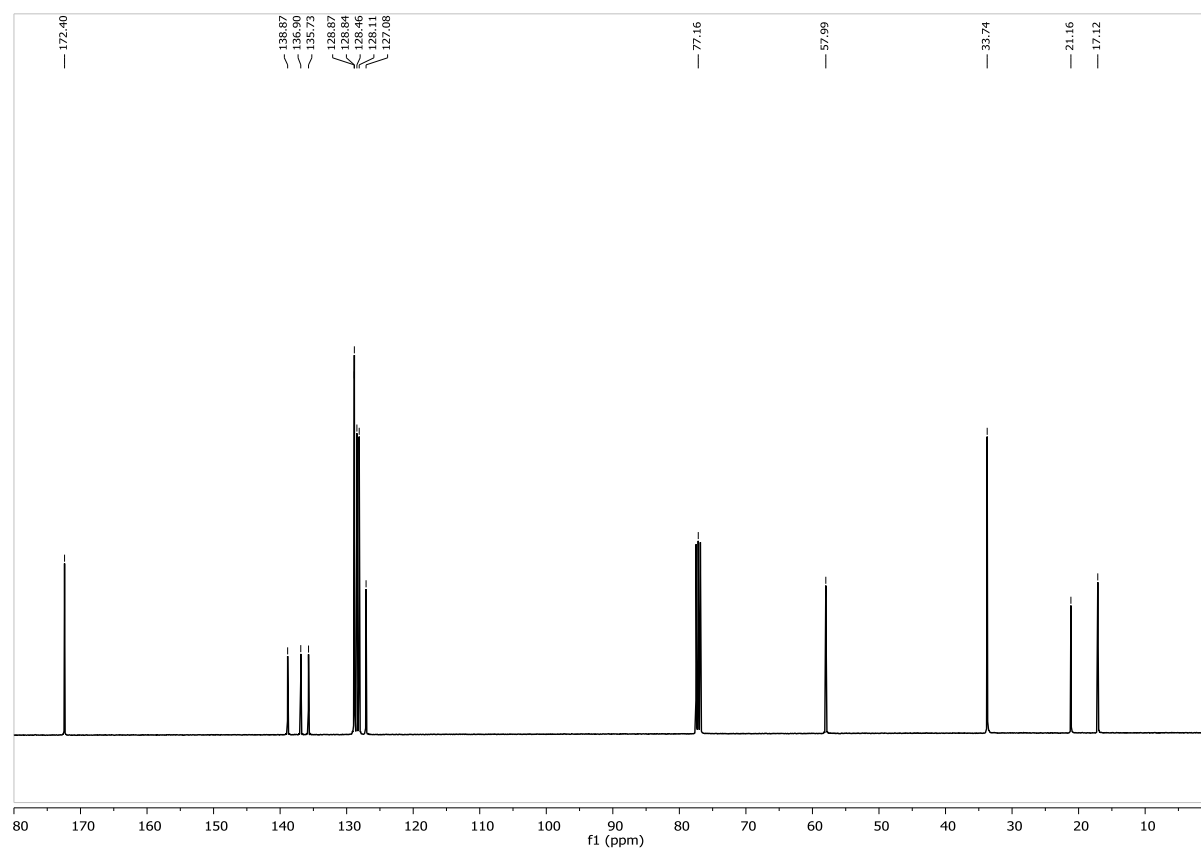

Supporting Information

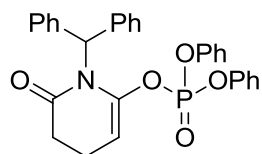

**4a**

$^1\text{H}$  NMR, 400 MHz,  $\text{C}_6\text{D}_6$

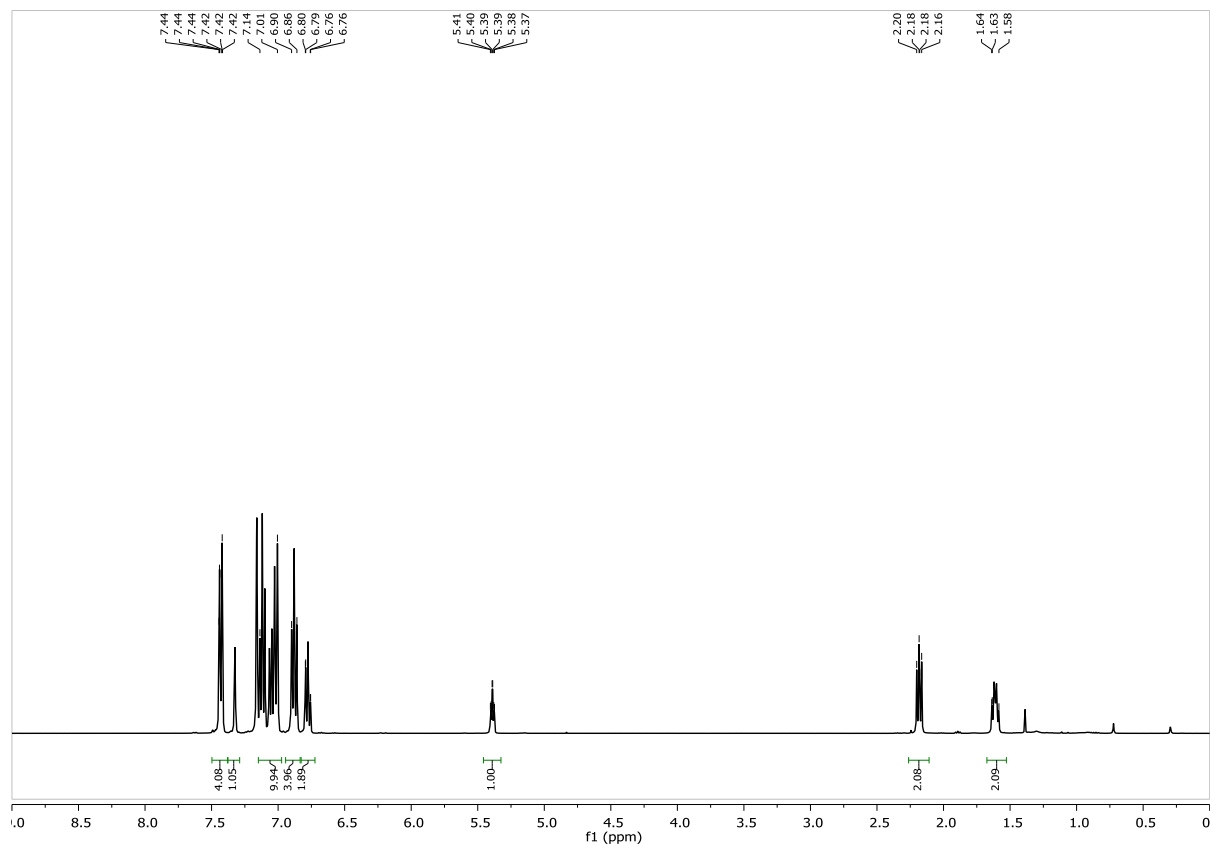

# Supporting Information



**4a**

$^{13}\text{C}\{^1\text{H}\}$  NMR, 151 MHz,  $\text{C}_6\text{D}_6$

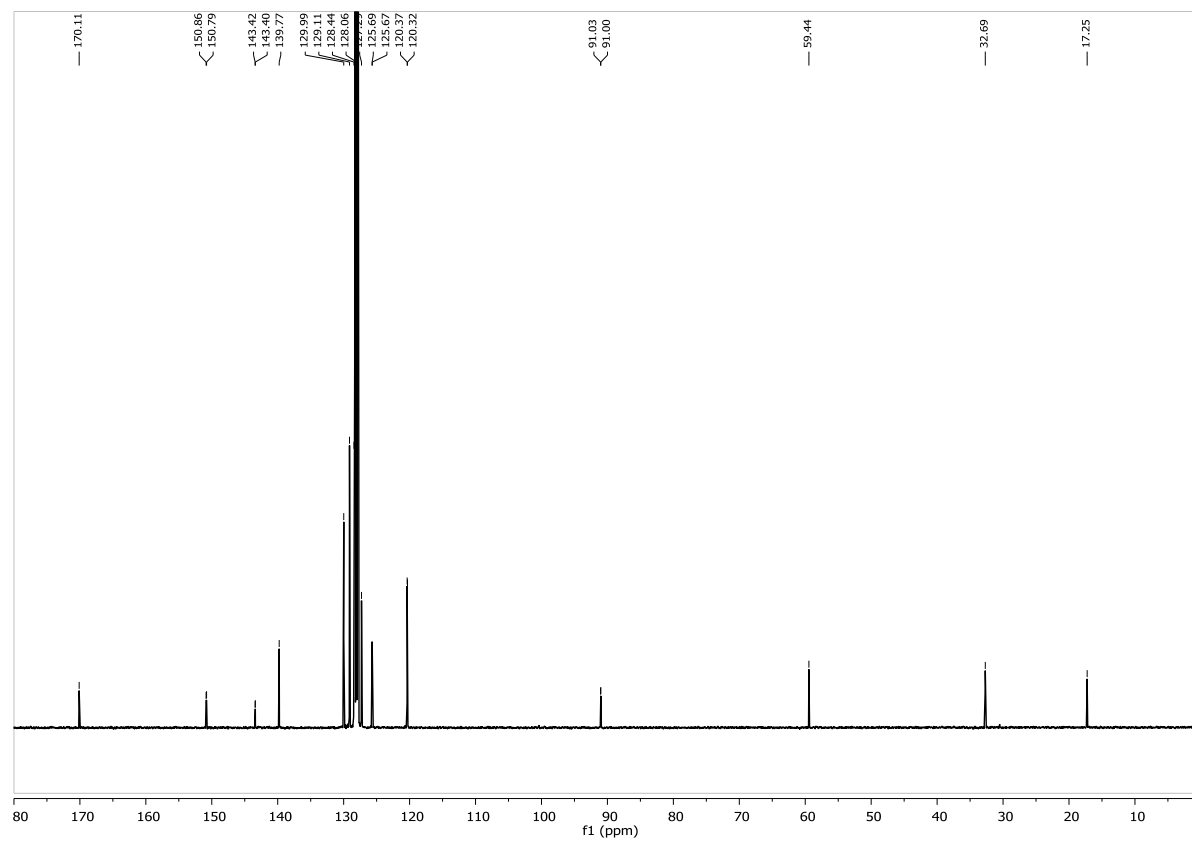



*Supporting Information*

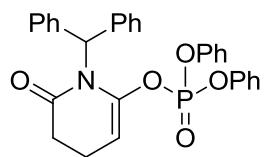

**4a**

$^{31}\text{P}\{^1\text{H}\}$  NMR, 162 MHz,  $\text{C}_6\text{D}_6$

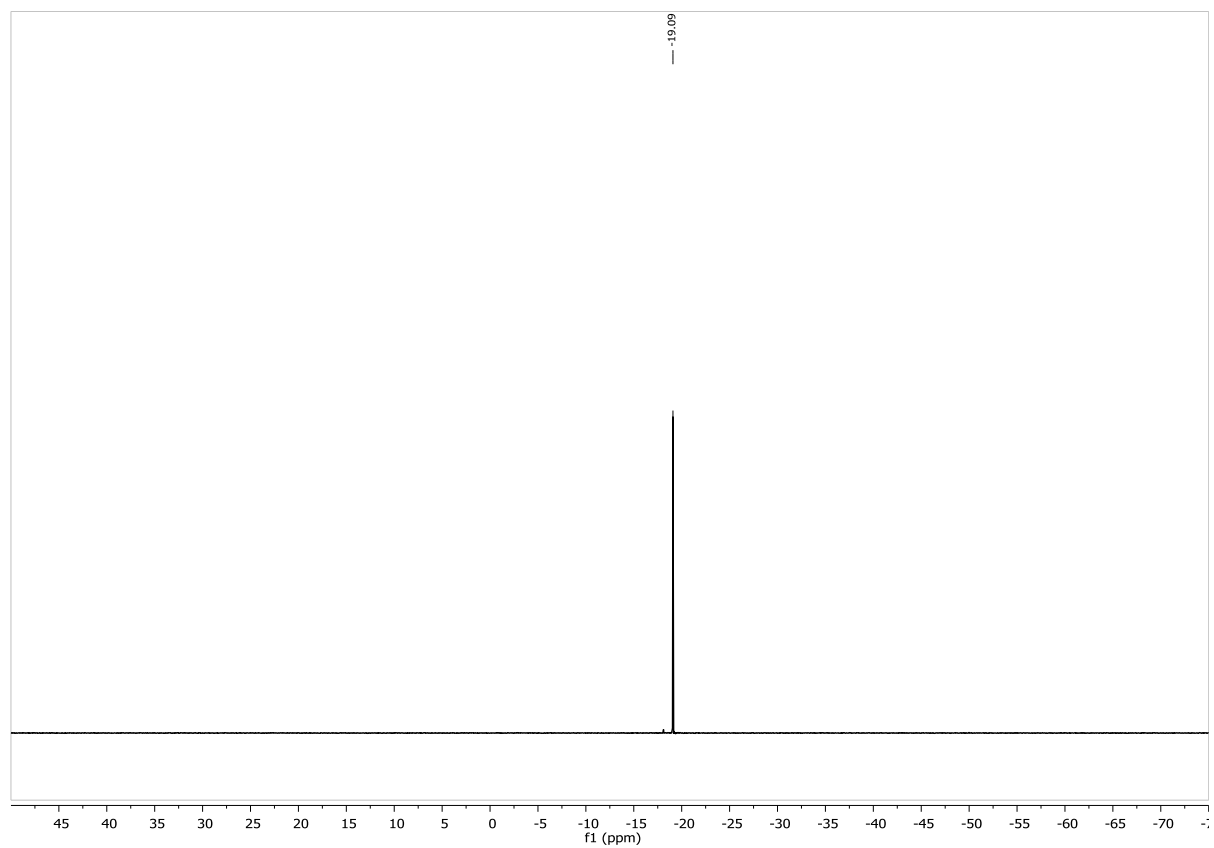

# Supporting Information

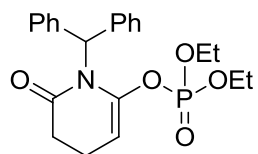

**4a'**

$^1\text{H}$  NMR, 400 MHz,  $\text{C}_6\text{D}_6$

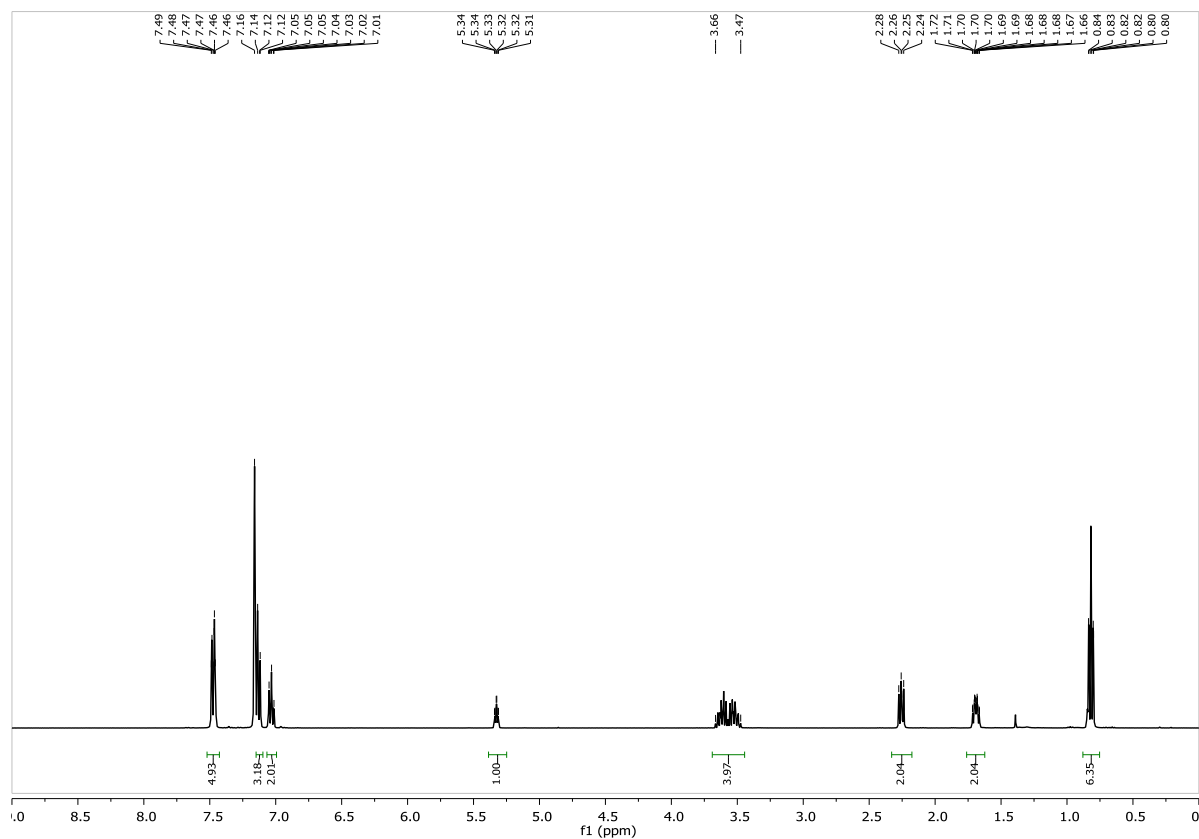

# Supporting Information

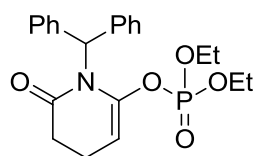

**4a'**  
 $^{13}\text{C}\{^1\text{H}\}$  NMR, 600 MHz,  $\text{C}_6\text{D}_6$

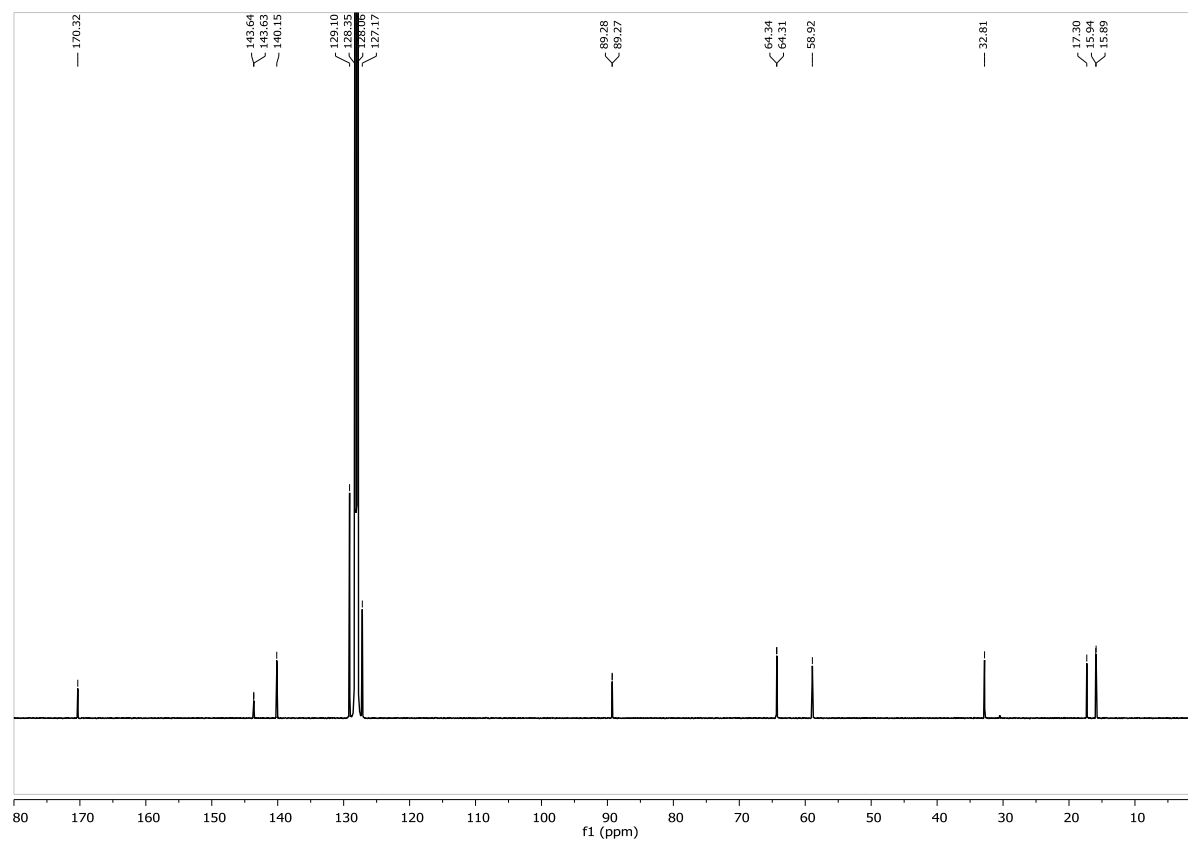

*Supporting Information*



**4a'**  
 $^{31}\text{P}\{^1\text{H}\}$  NMR, 162 MHz,  $\text{C}_6\text{D}_6$

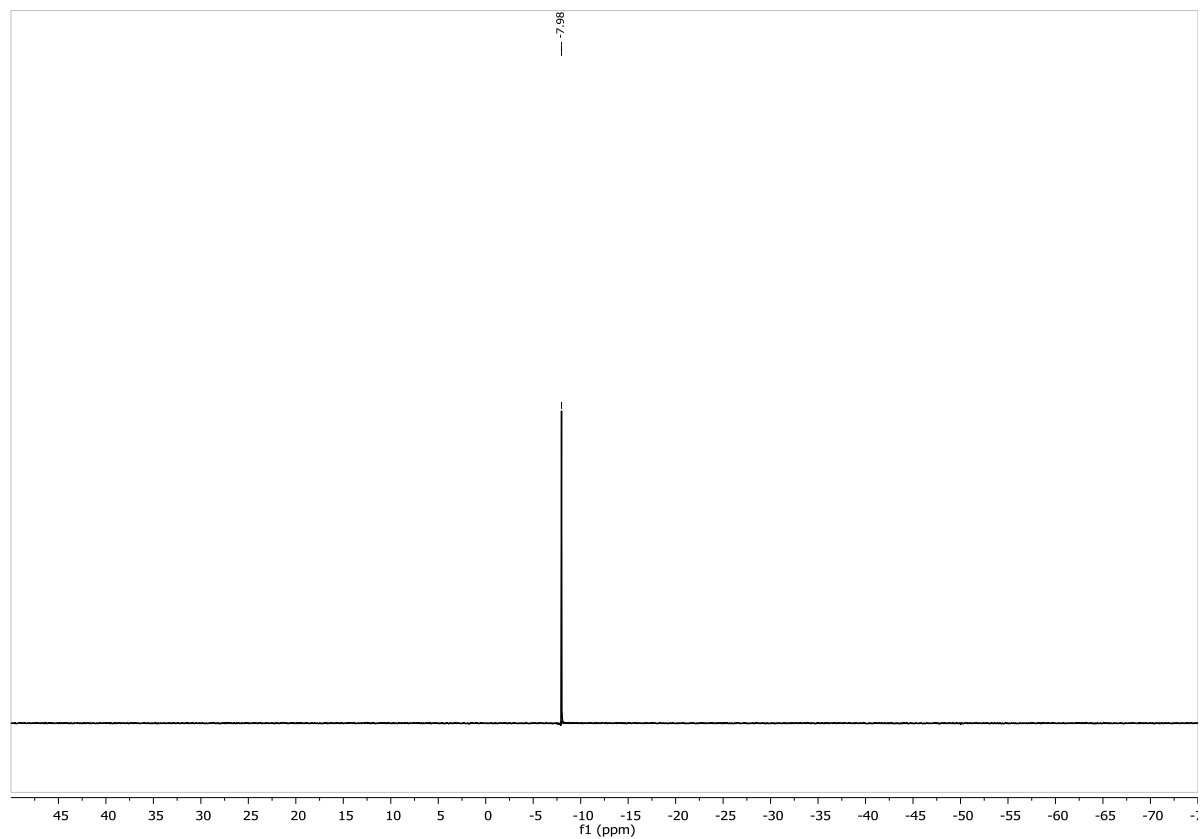

Supporting Information

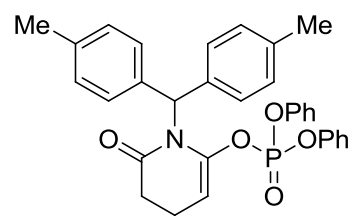

**4b**

$^1\text{H}$  NMR, 400 MHz,  $\text{C}_6\text{D}_6$

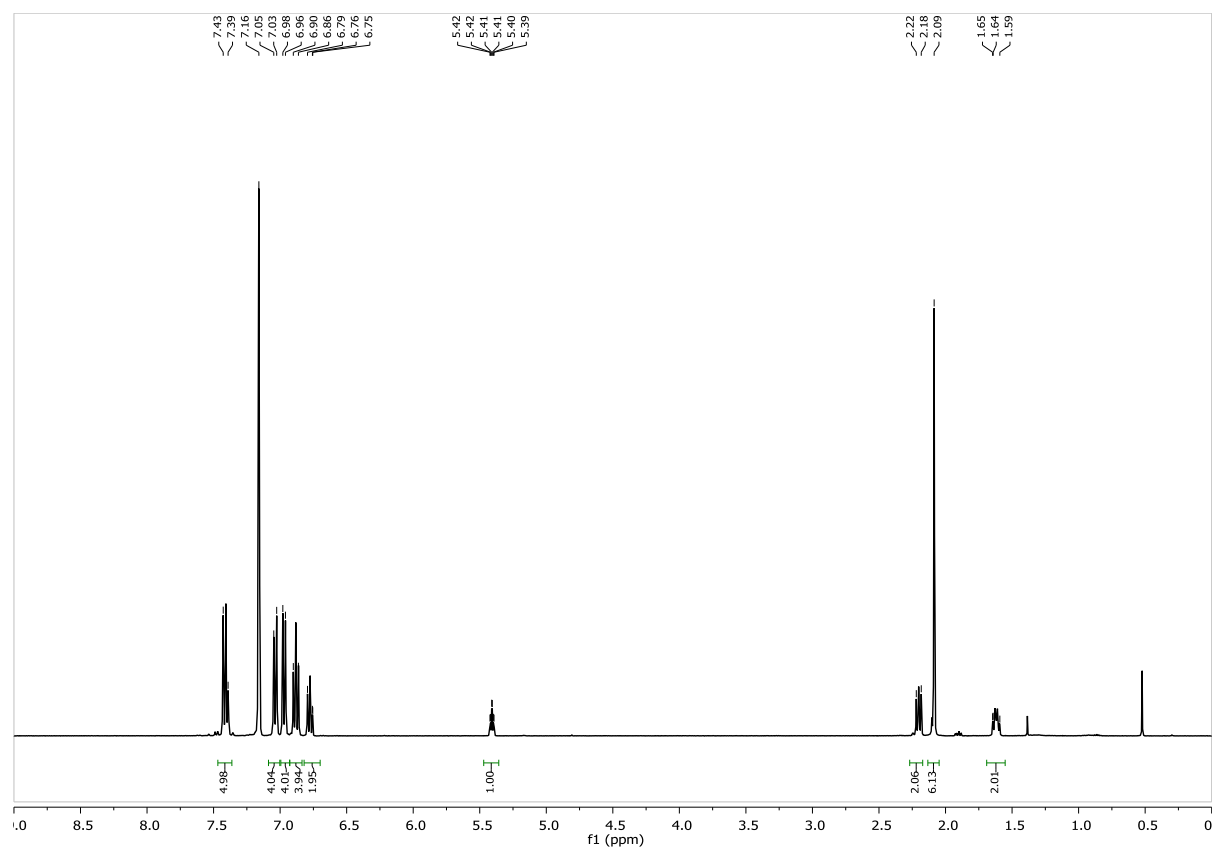

*Supporting Information*

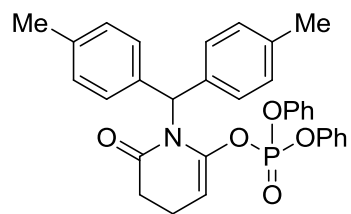

**4b**

$^{31}P\{^1H\}$  NMR, 162 MHz,  $C_6D_6$

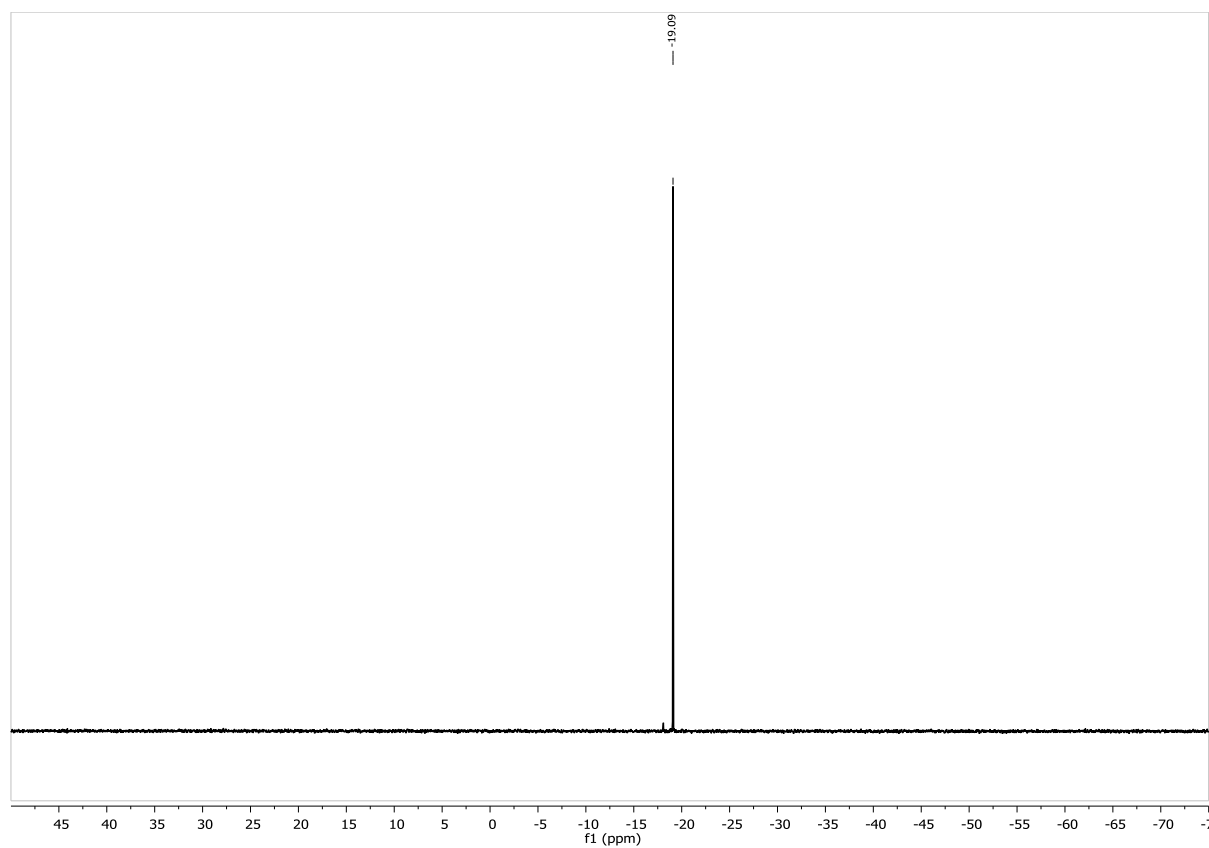

# Supporting Information

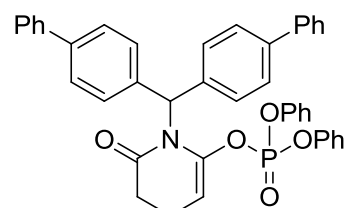

**4c**

$^1\text{H}$  NMR, 400 MHz,  $\text{C}_6\text{D}_6$

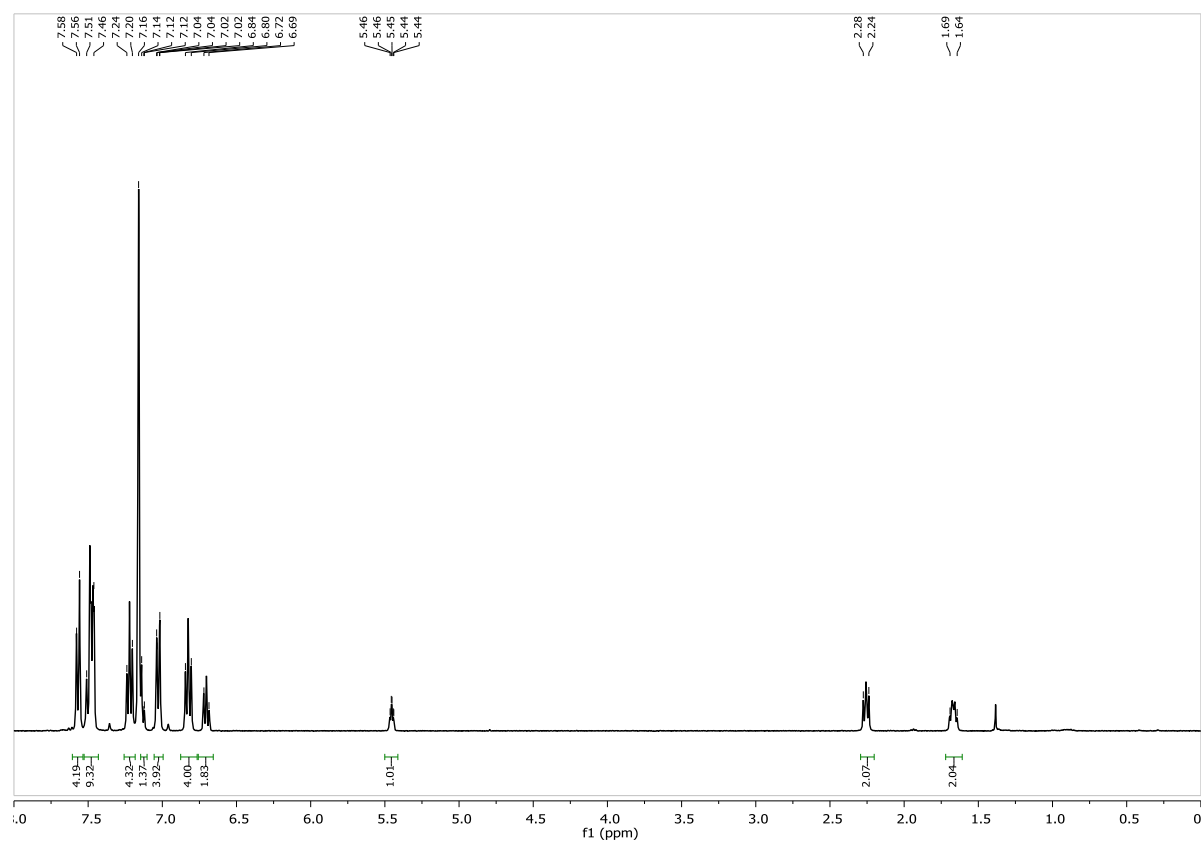

Supporting Information

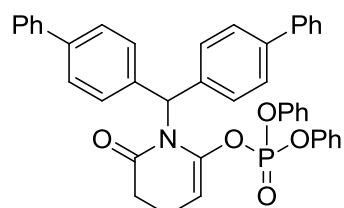

**4c**

$^{13}\text{C}\{^1\text{H}\}$  NMR, 101 MHz,  $\text{C}_6\text{D}_6$

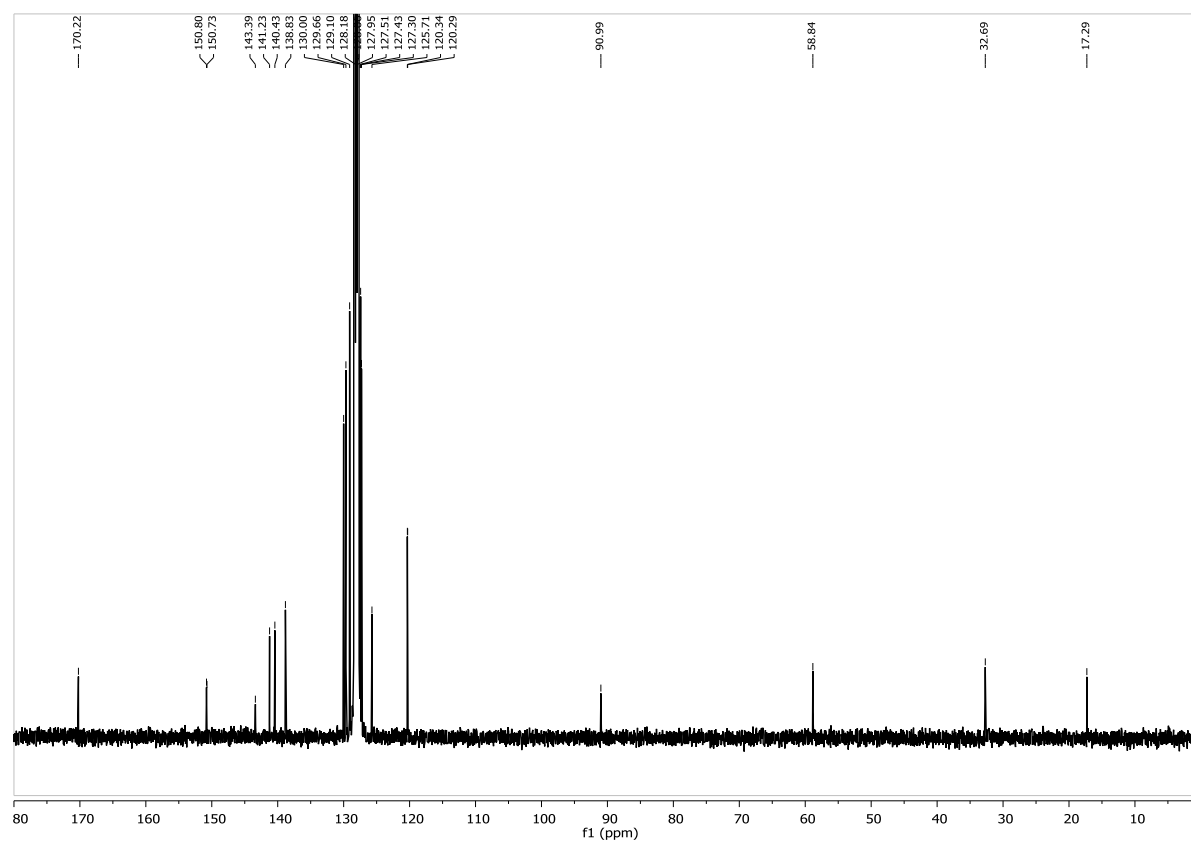



*Supporting Information*

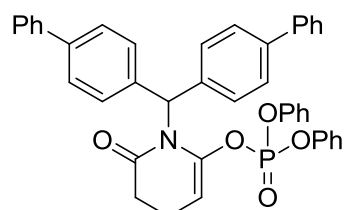

**4c**  
 $^{31}\text{P}\{^1\text{H}\}$  NMR, 162 MHz,  $\text{C}_6\text{D}_6$

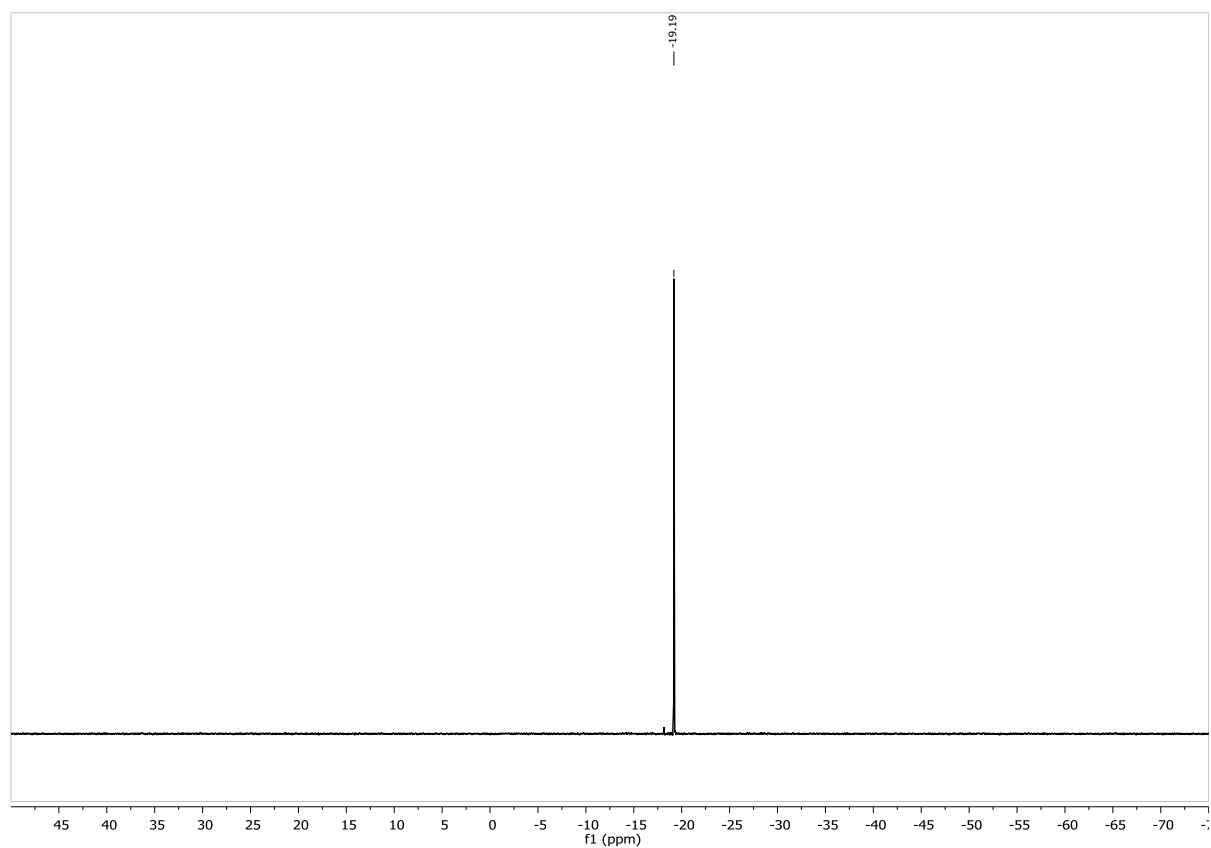

# Supporting Information

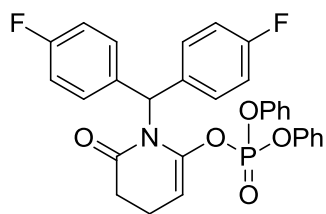

**4d**

$^1\text{H}$  NMR, 400 MHz,  $\text{C}_6\text{D}_6$

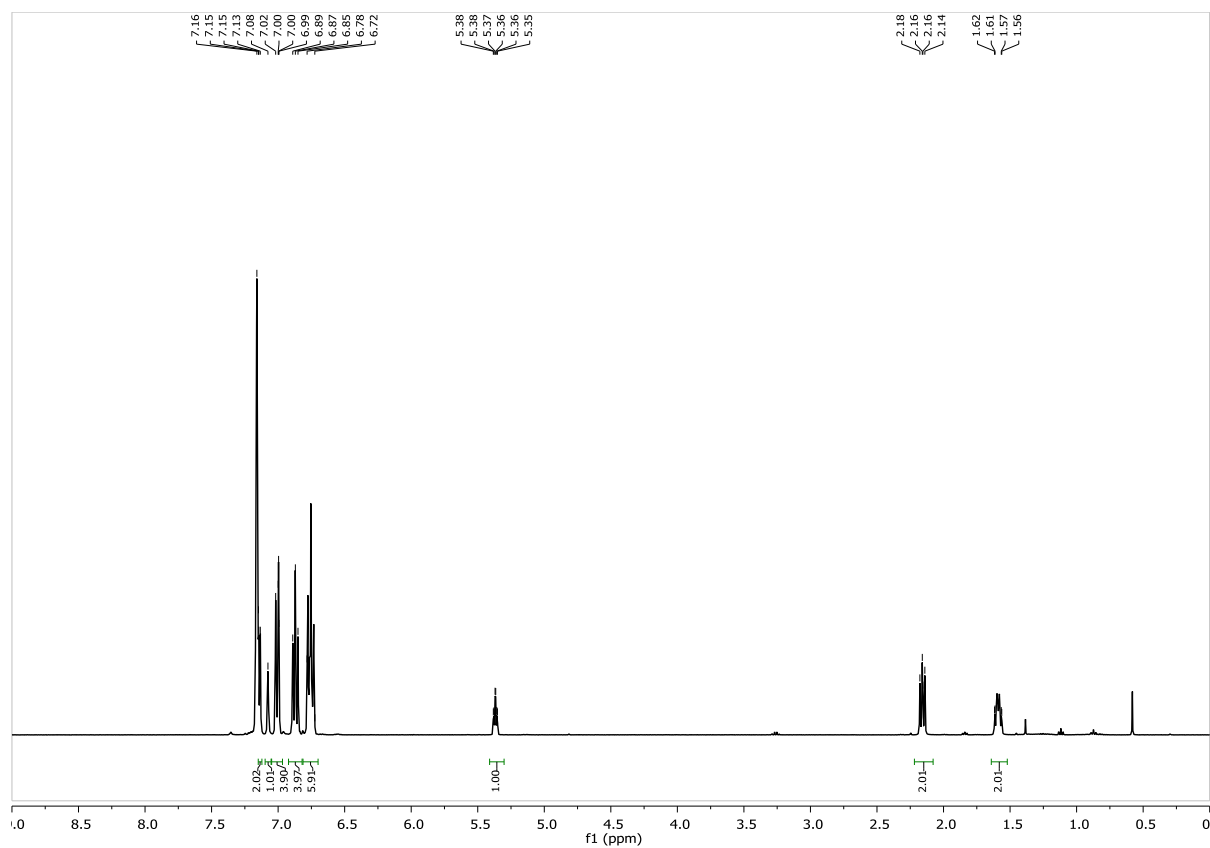

*Supporting Information*

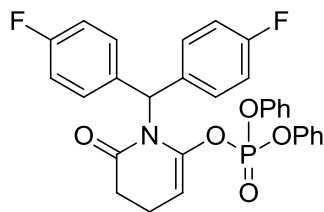

**4d**  
 $^{19}\text{F}\{^1\text{H}\}$  NMR, 376 MHz,  $\text{C}_6\text{D}_6$

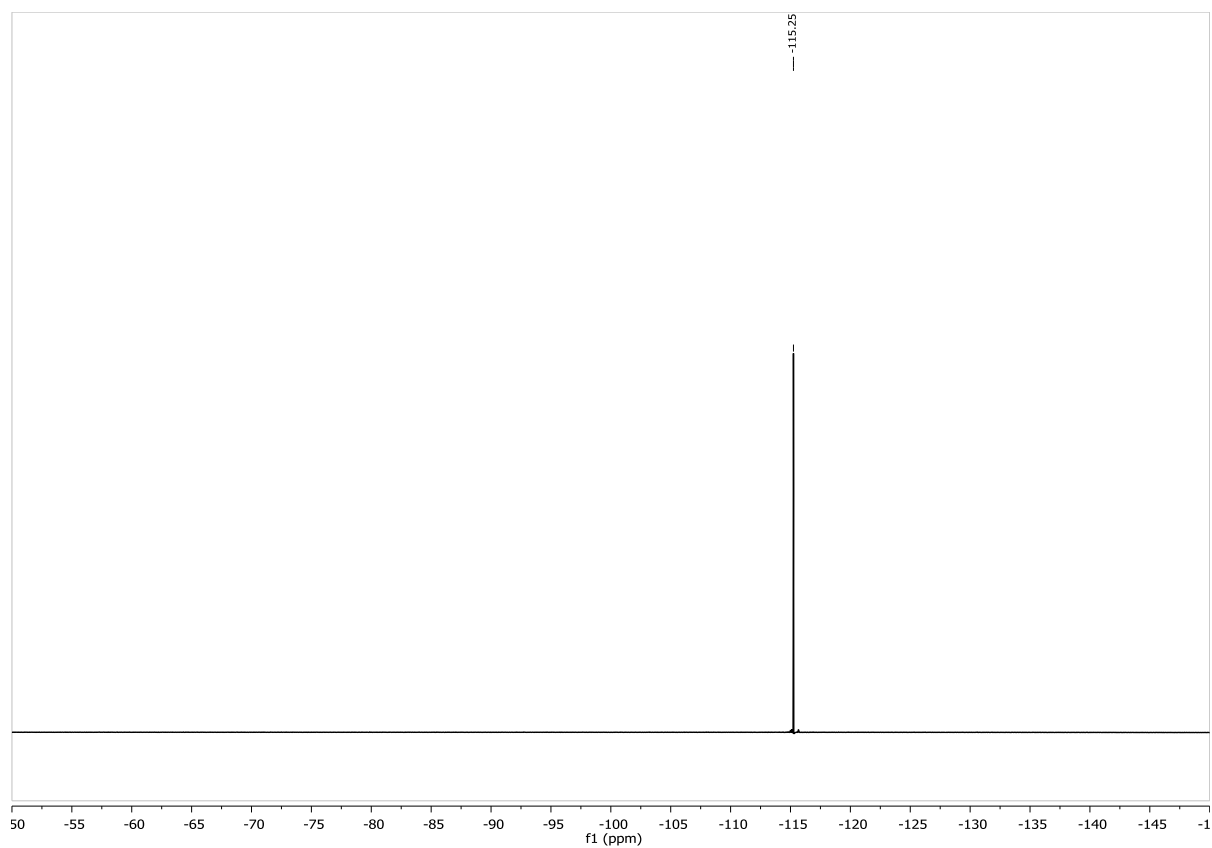

*Supporting Information*

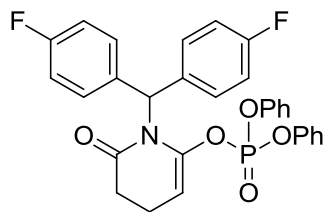

**4d**

$^{31}\text{P}\{^1\text{H}\}$  NMR, 162 MHz,  $\text{C}_6\text{D}_6$

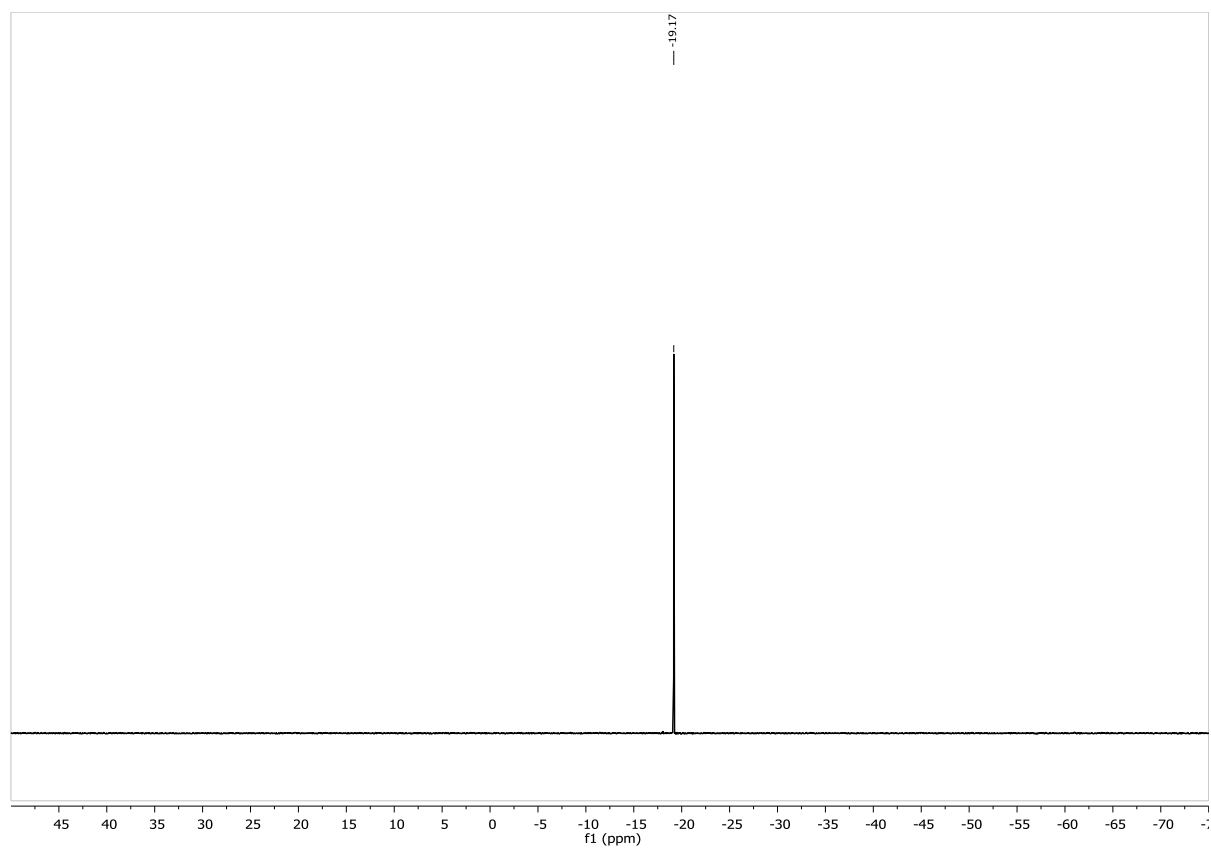

Supporting Information

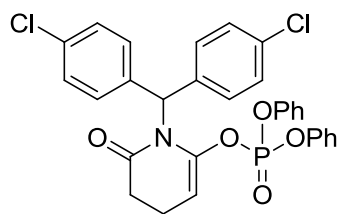

**4e**

$^1\text{H}$  NMR, 400 MHz,  $\text{C}_6\text{D}_6$

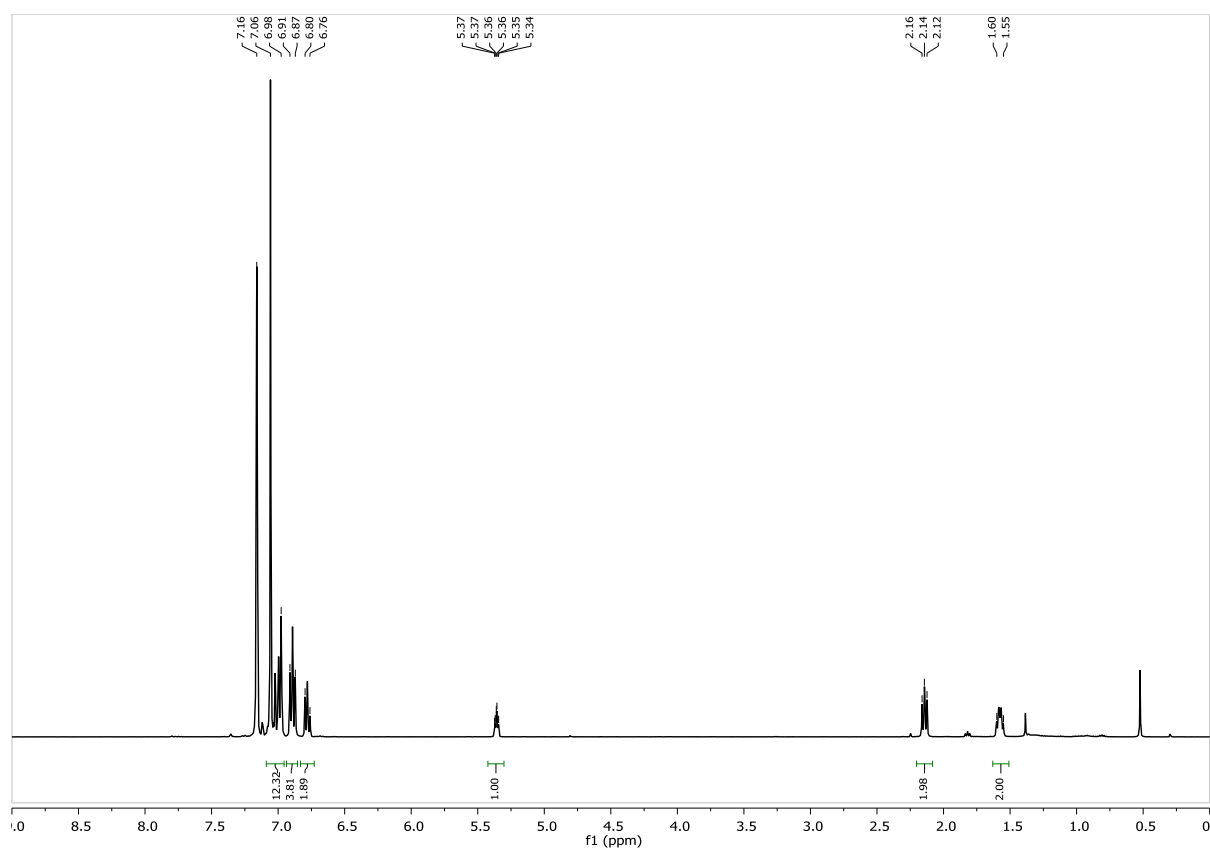

*Supporting Information*

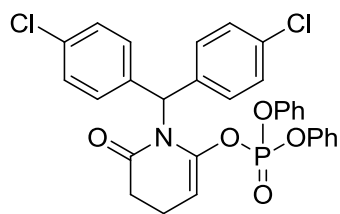

**4e**

$^{31}\text{P}\{^1\text{H}\}$  NMR, 162 MHz,  $\text{C}_6\text{D}_6$

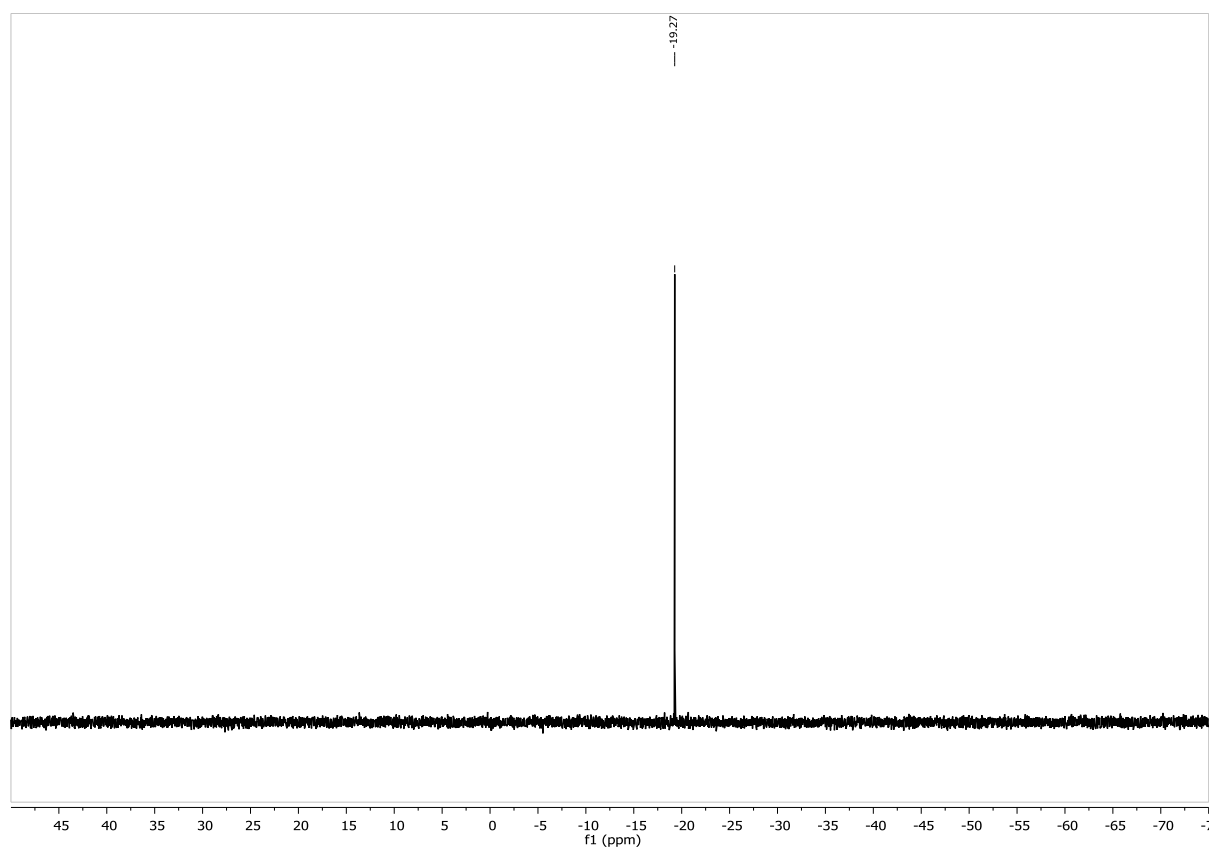

Supporting Information

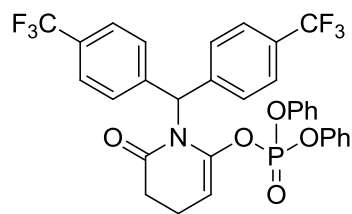

**4f**

$^1\text{H}$  NMR, 400 MHz,  $\text{C}_6\text{D}_6$

▲ starting material

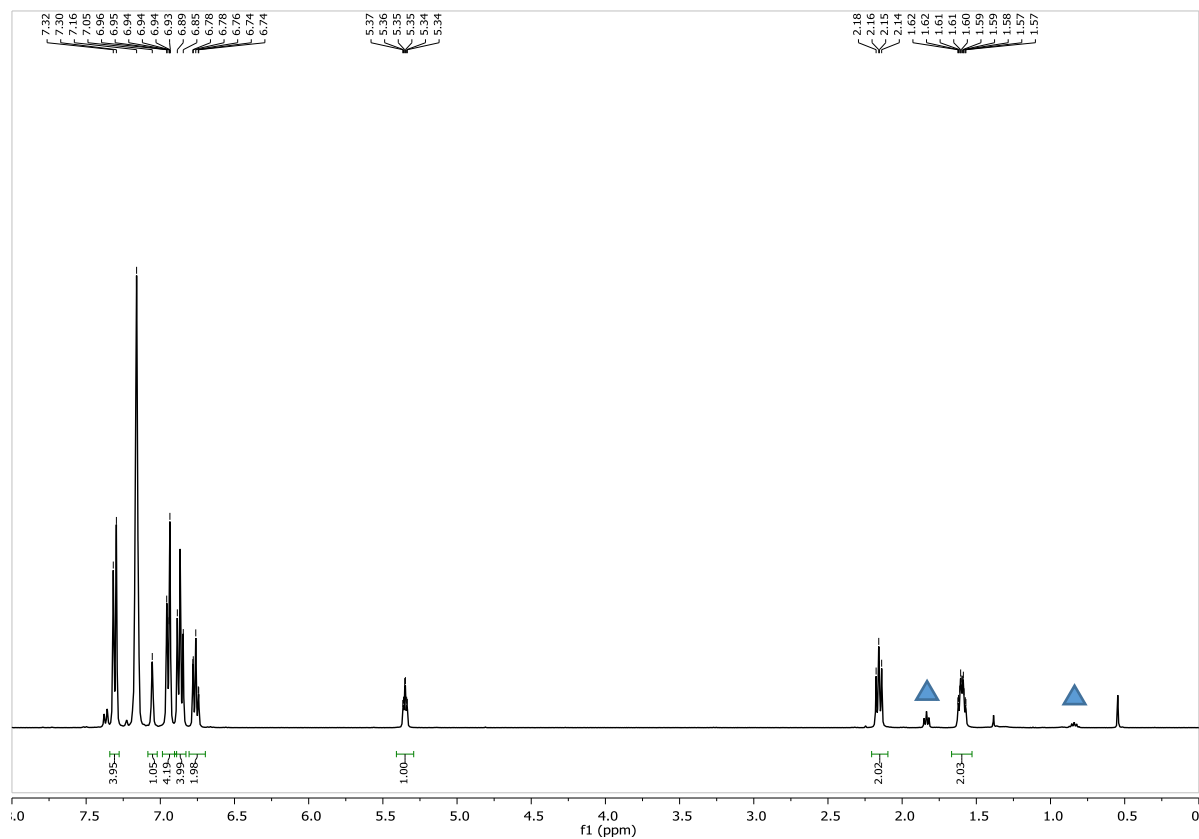

*Supporting Information*

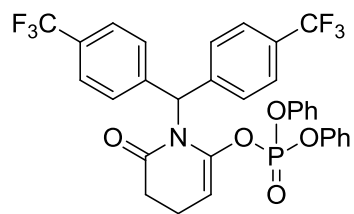

**4f**

$^{19}\text{F}\{^1\text{H}\}$  NMR, 376 MHz,  $\text{C}_6\text{D}_6$

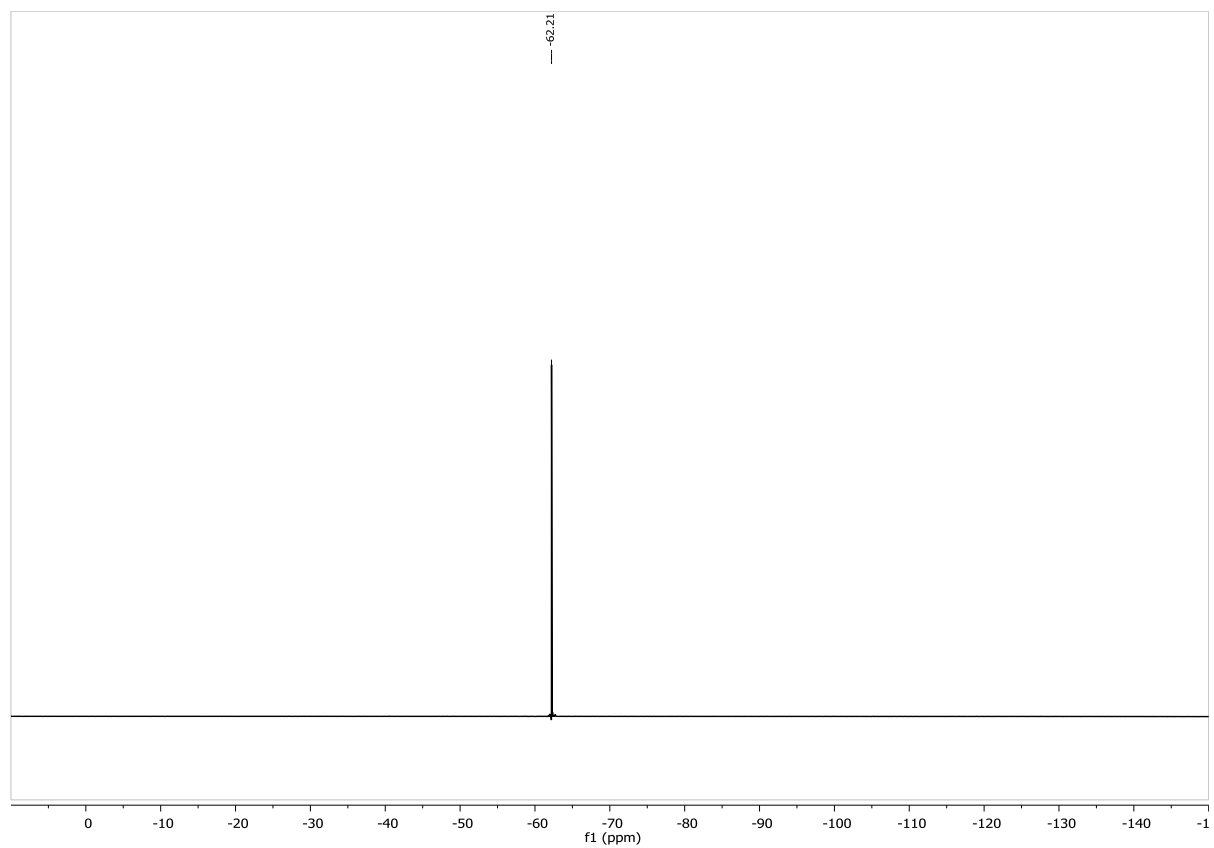



*Supporting Information*



**4f**

$^{31}\text{P}\{^1\text{H}\}$  NMR, 162 MHz,  $\text{C}_6\text{D}_6$

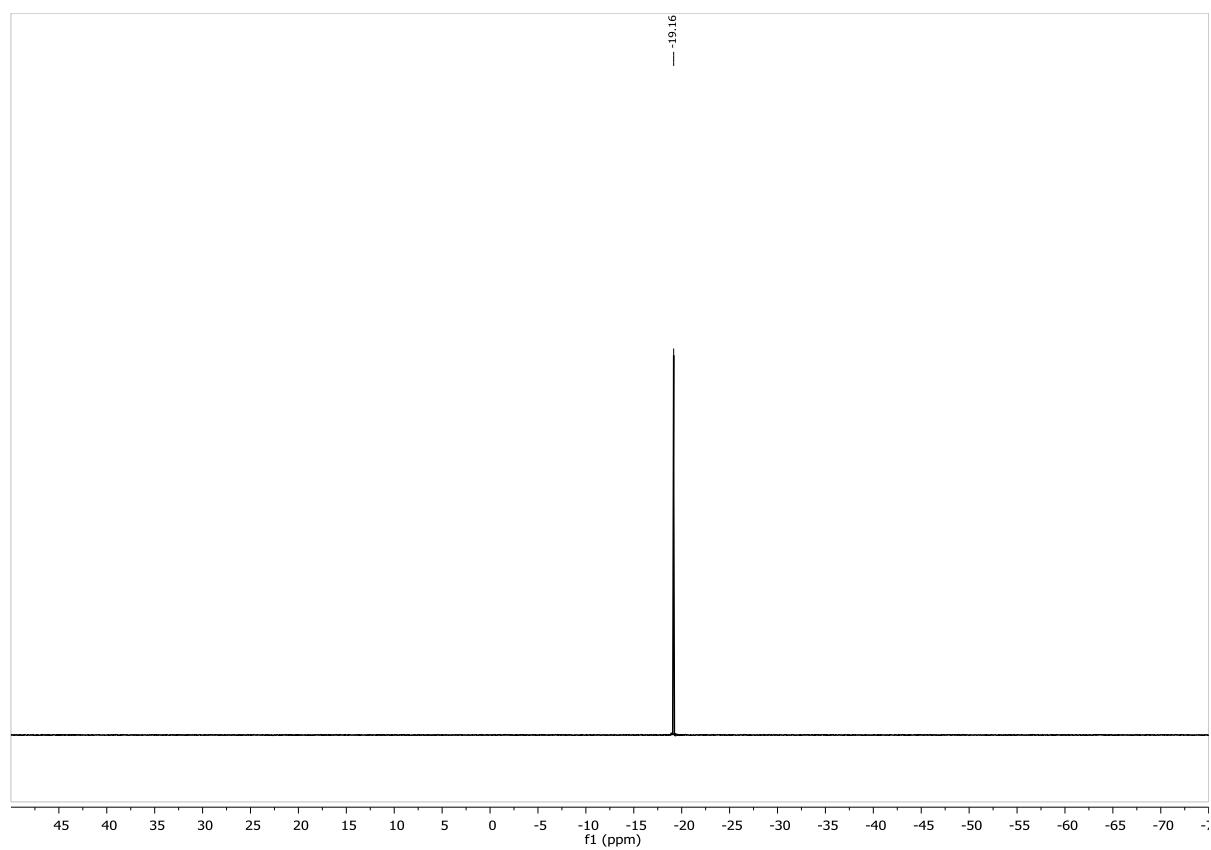

# Supporting Information

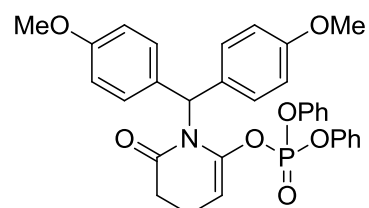

**4g**

$^1\text{H}$  NMR, 400 MHz,  $\text{C}_6\text{D}_6$

▲ starting material

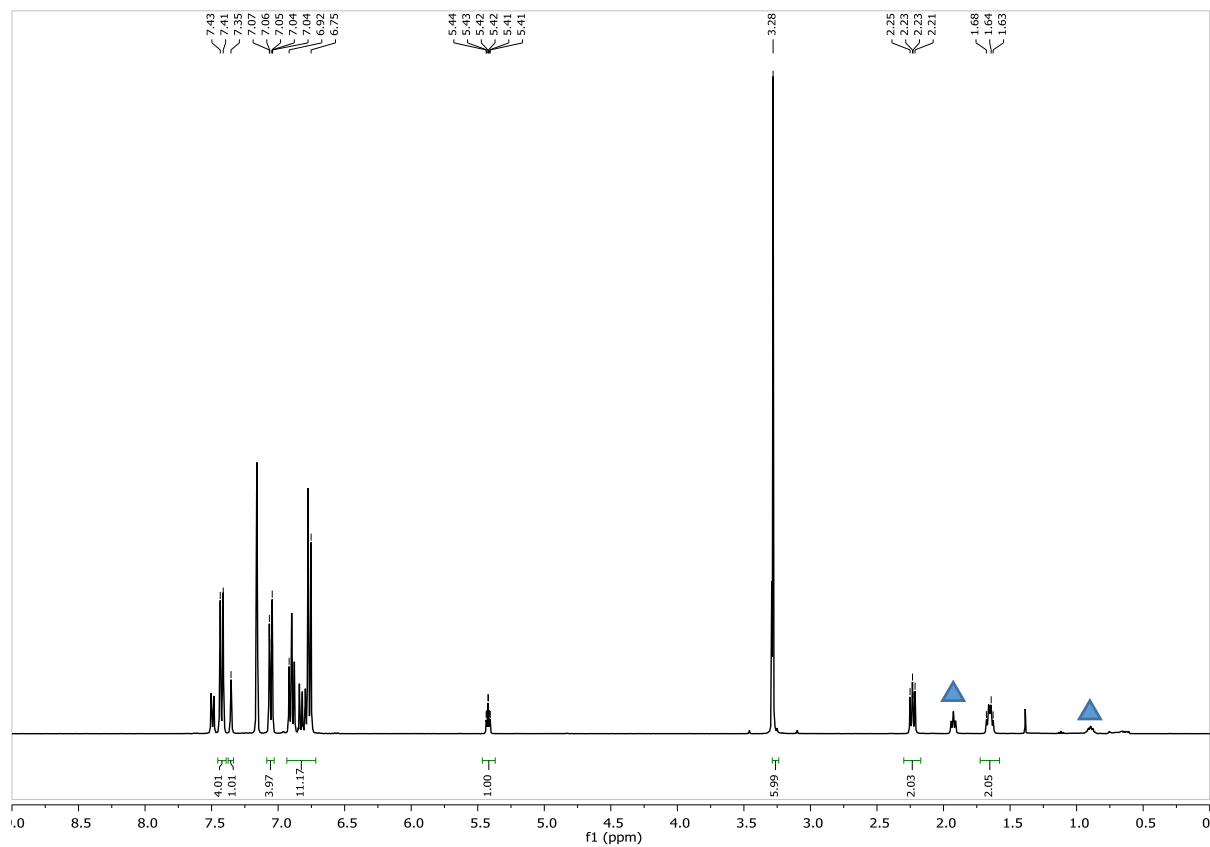

## Supporting Information

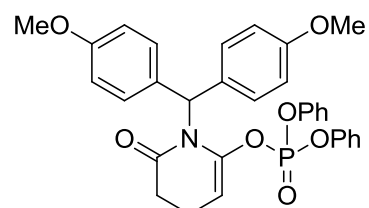

**4g**

 $^{31}\text{P}\{^1\text{H}\}$  NMR, 162 MHz,  $\text{C}_6\text{D}_6$ 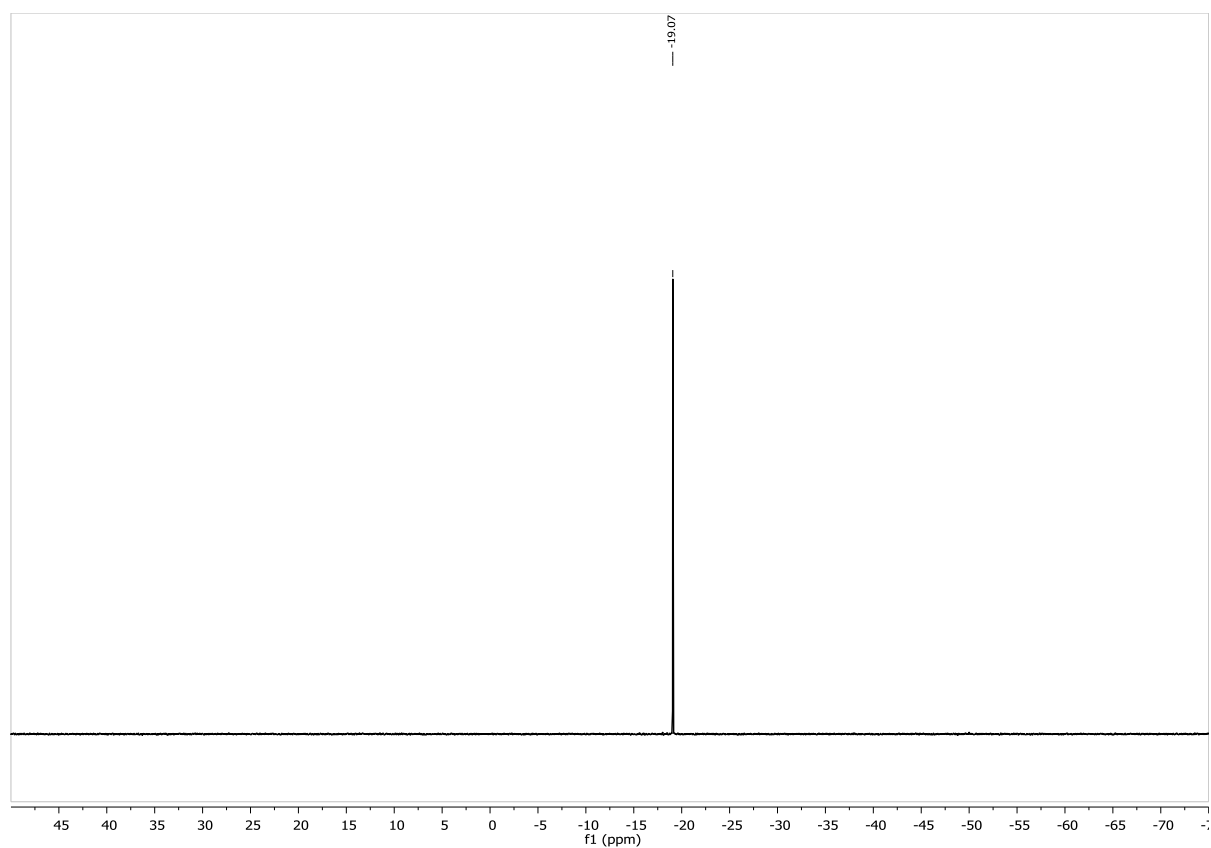

# Supporting Information

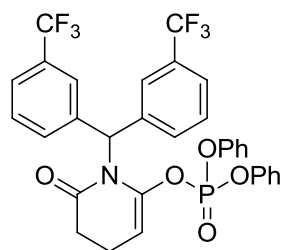

**4h**

$^1\text{H}$  NMR, 400 MHz,  $\text{C}_6\text{D}_6$

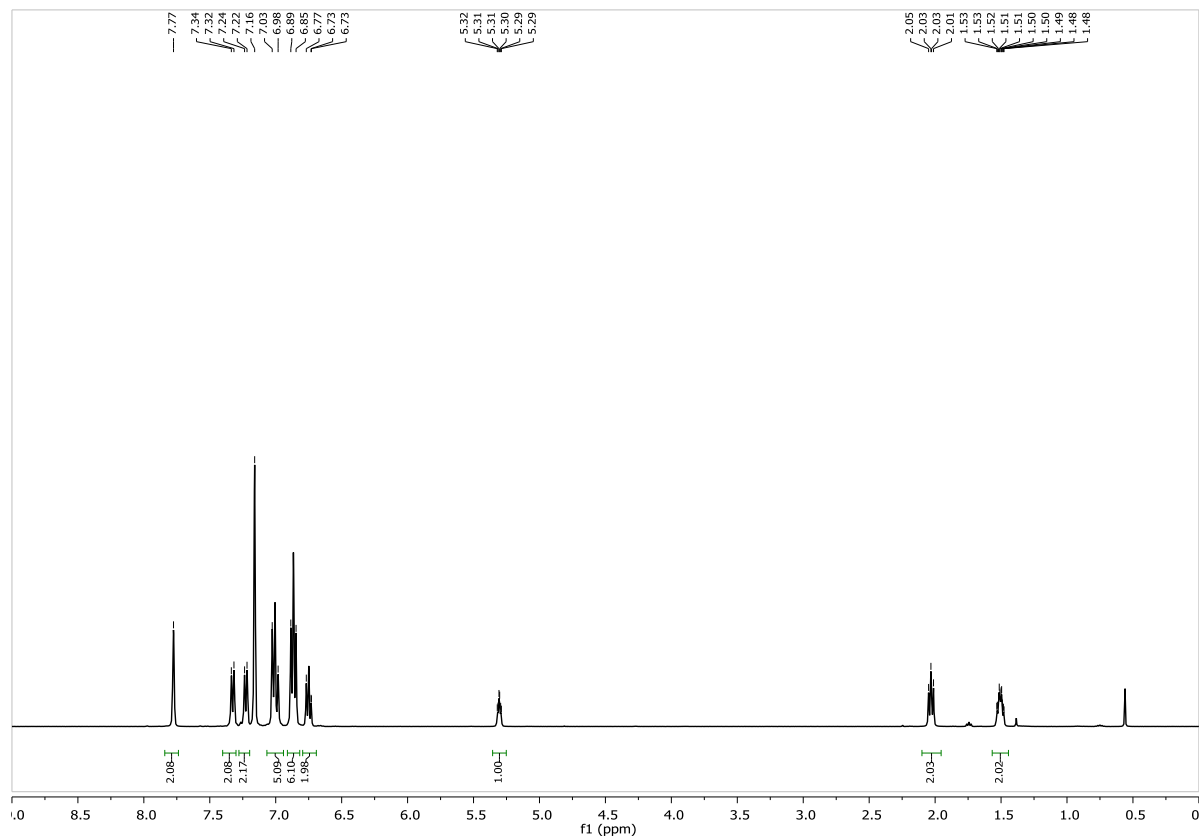

*Supporting Information*

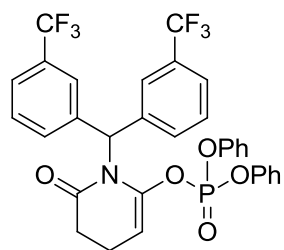

**4h**  
 $^{19}\text{F}\{^1\text{H}\}$  NMR, 376 MHz,  $\text{C}_6\text{D}_6$

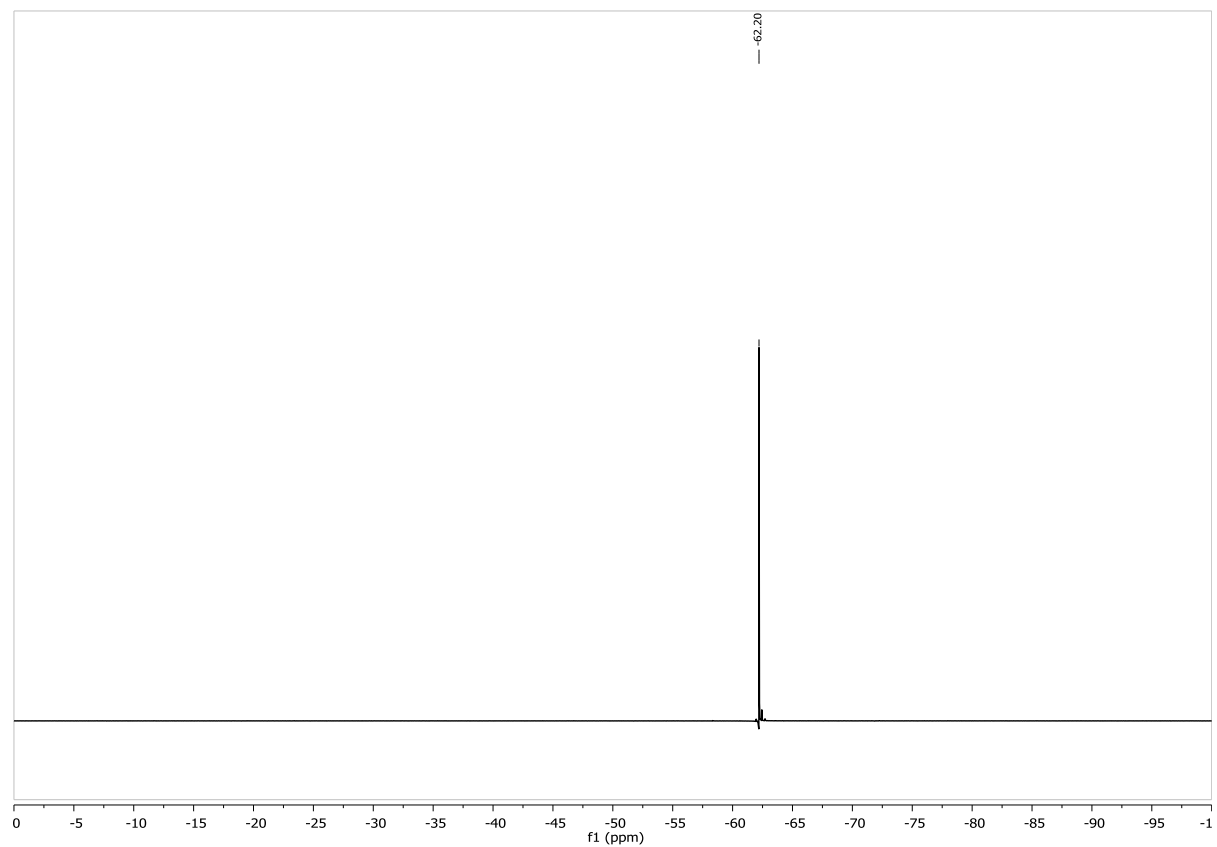

*Supporting Information*

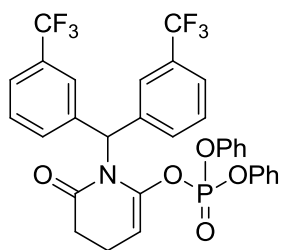

**4h**

$^{31}\text{P}\{^1\text{H}\}$  NMR, 162 MHz,  $\text{C}_6\text{D}_6$

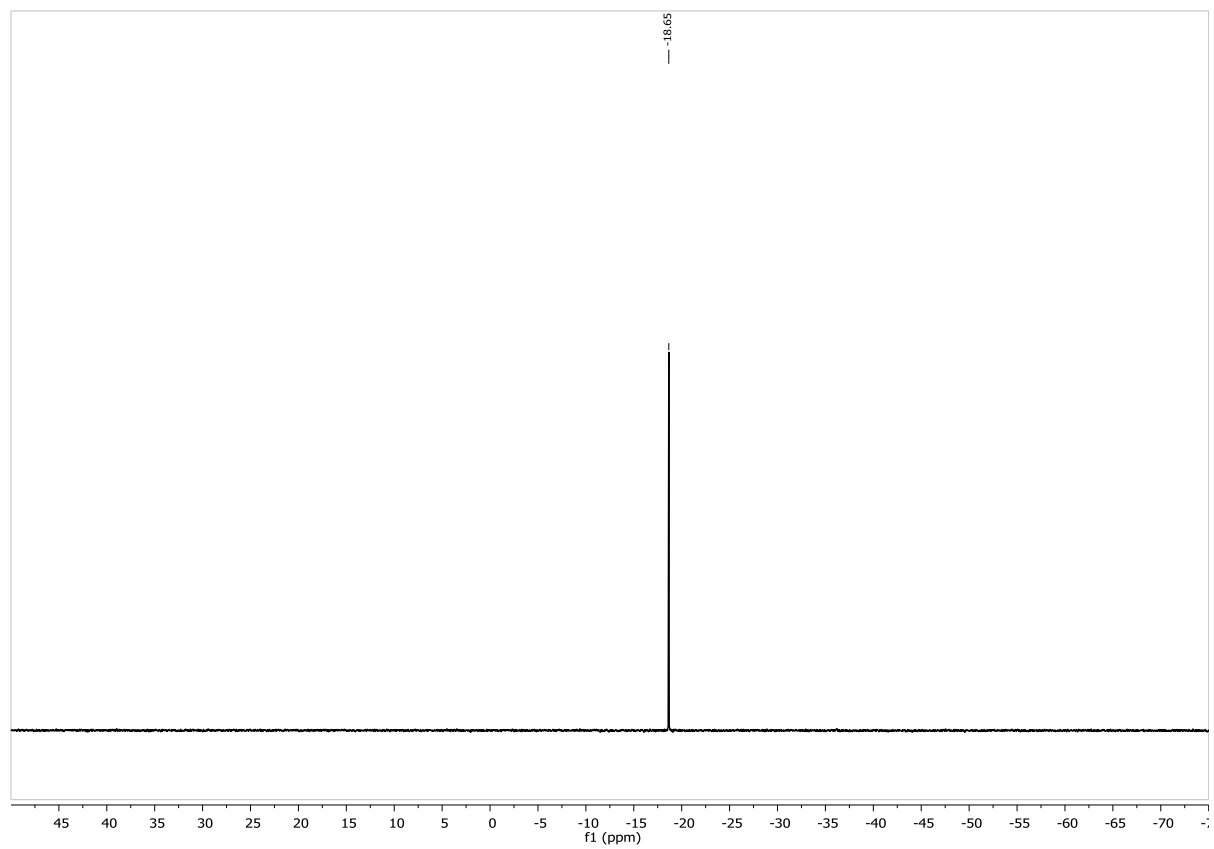

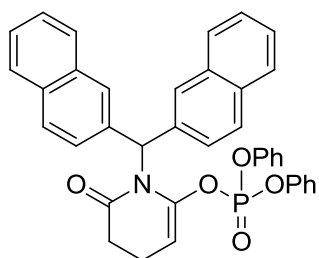**4i** $^1\text{H}$  NMR, 400 MHz,  $\text{C}_6\text{D}_6$ 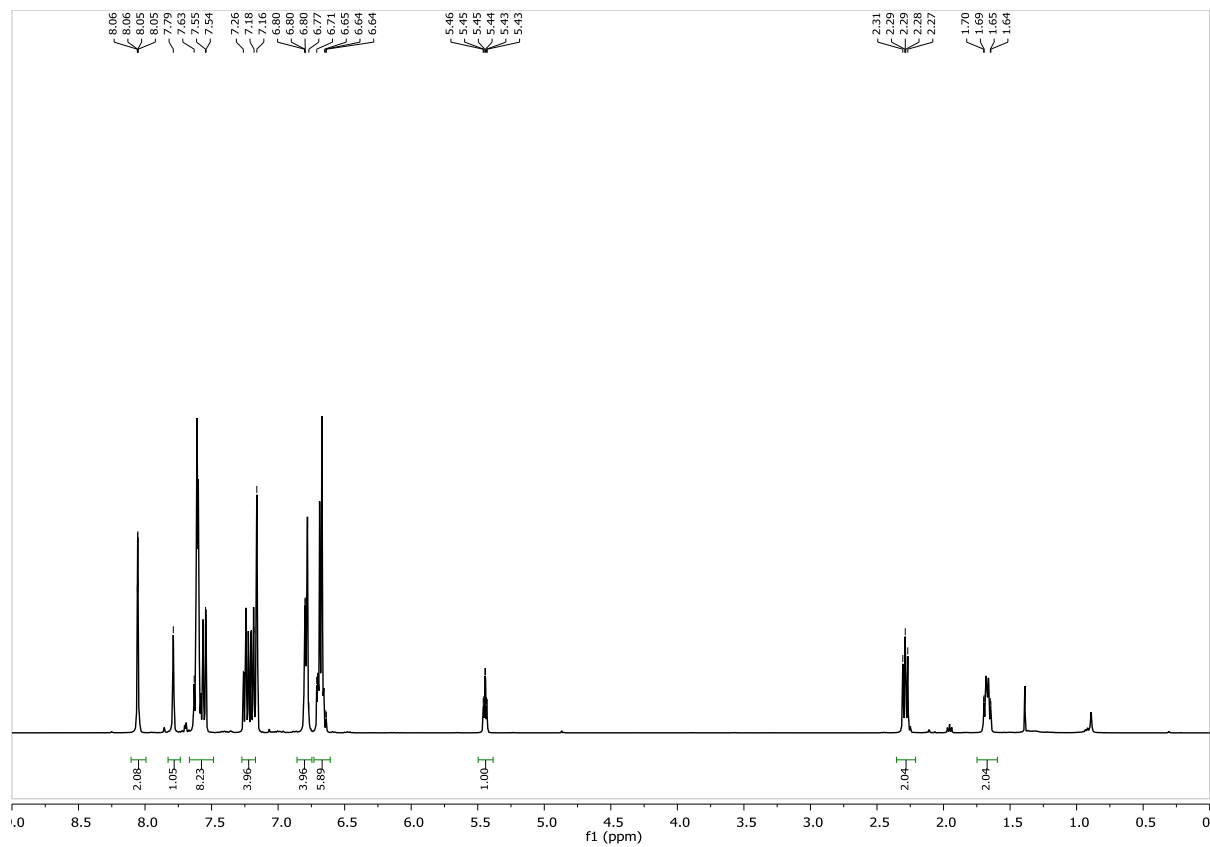

*Supporting Information*

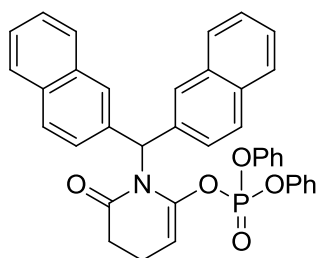

**4i**

$^{31}\text{P}\{^1\text{H}\}$  NMR, 162 MHz,  $\text{C}_6\text{D}_6$

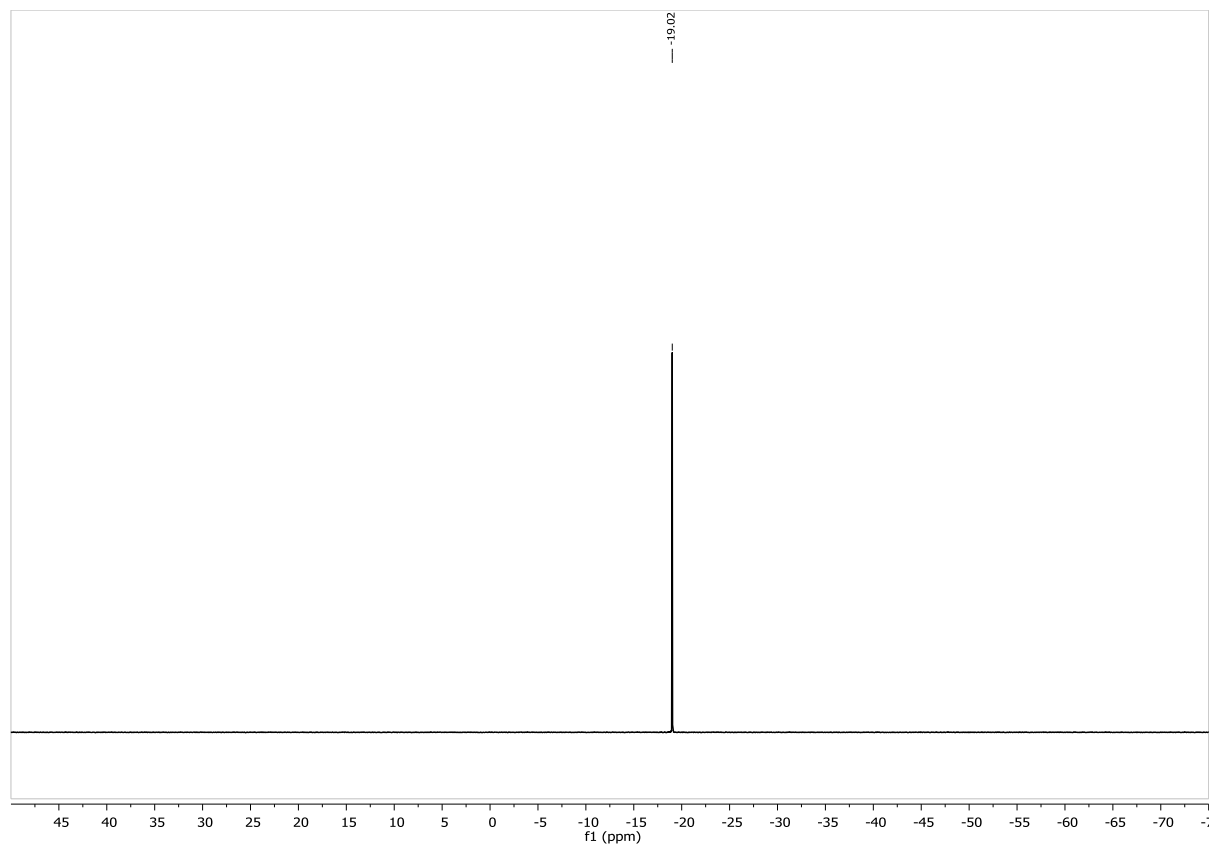



Supporting Information

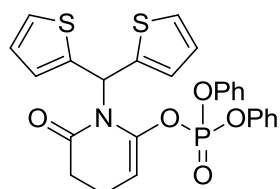

**4j**

$^1\text{H}$  NMR, 400 MHz,  $\text{C}_6\text{D}_6$

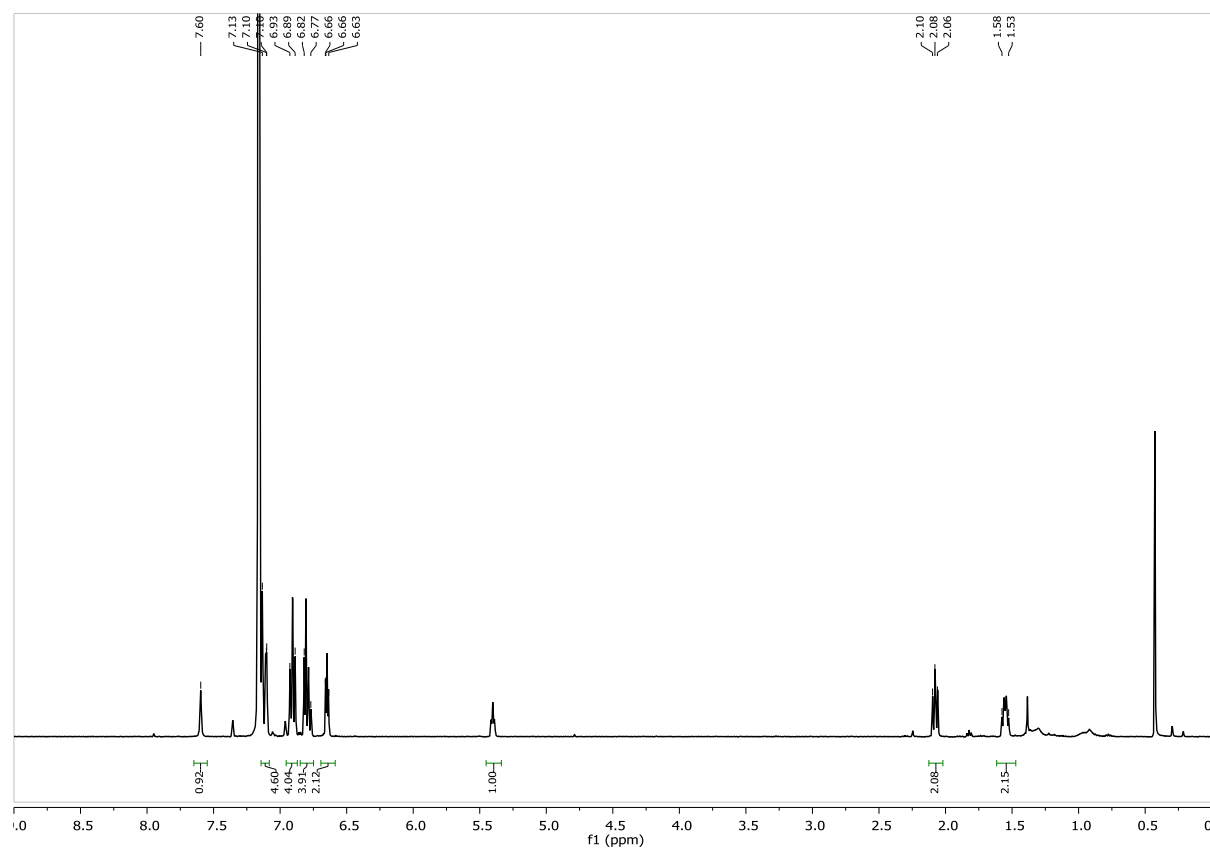

*Supporting Information*

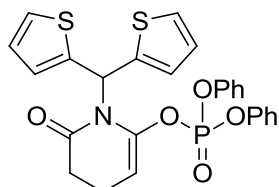

**4j**

$^{31}\text{P}\{^1\text{H}\}$  NMR, 162 MHz,  $\text{C}_6\text{D}_6$

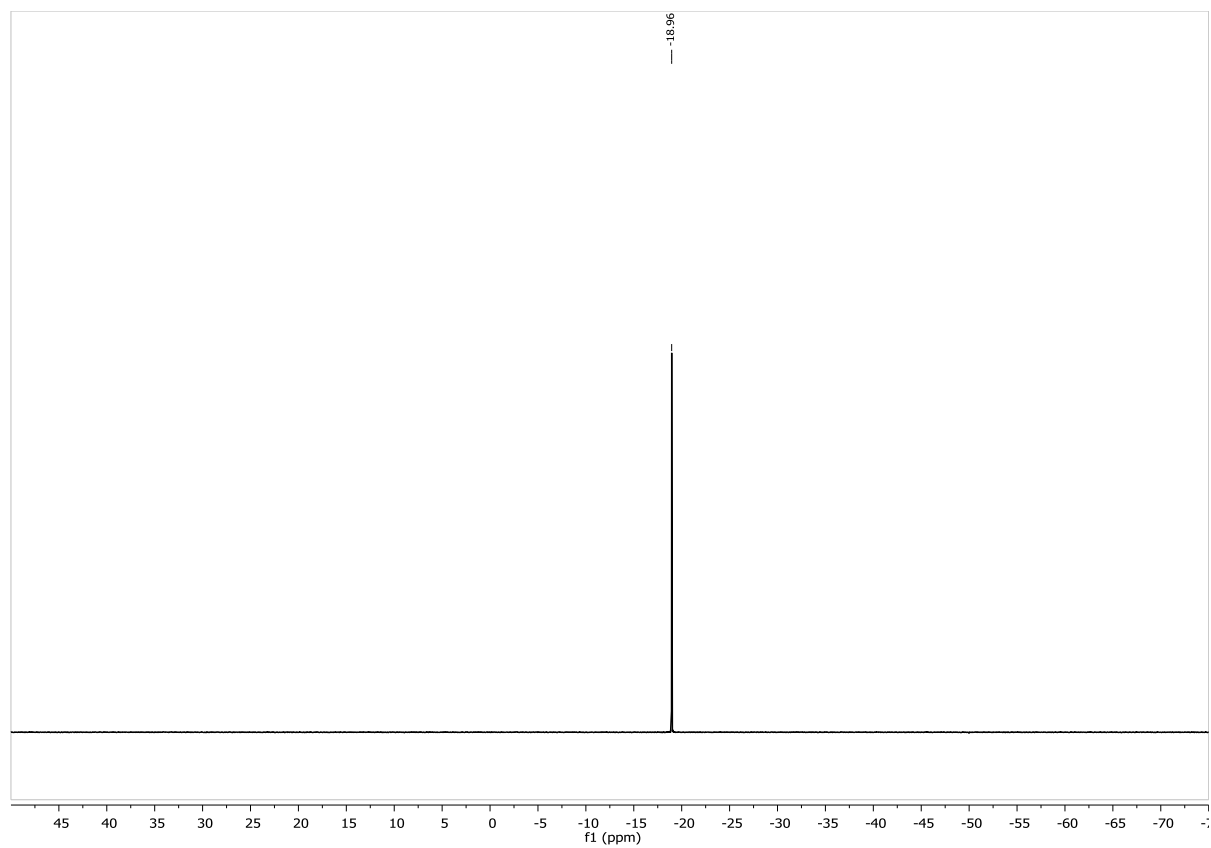

Supporting Information

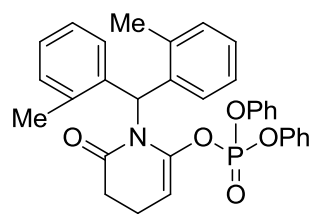

**4k**

$^1\text{H}$  NMR, 400 MHz,  $\text{C}_6\text{D}_6$

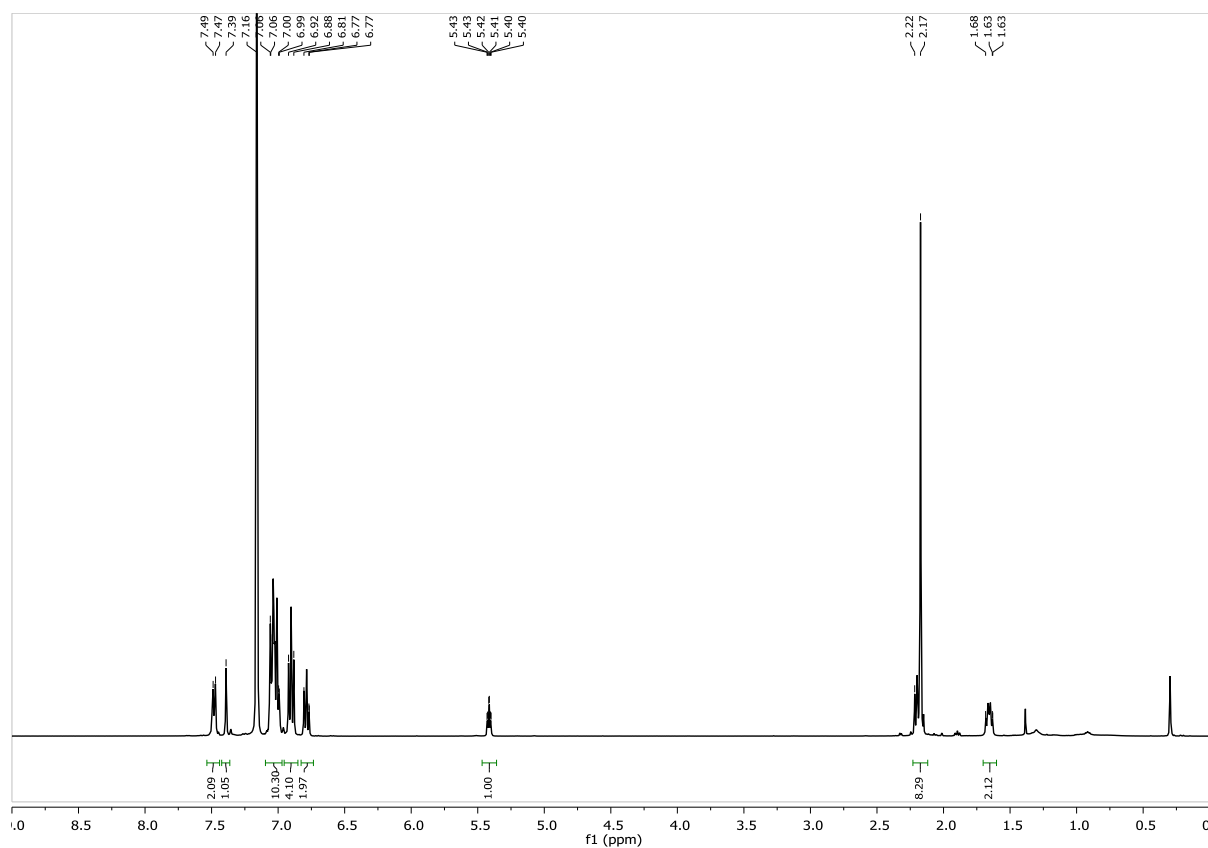

*Supporting Information*



**4k**

$^{31}\text{P}\{^1\text{H}\}$  NMR, 162 MHz,  $\text{C}_6\text{D}_6$

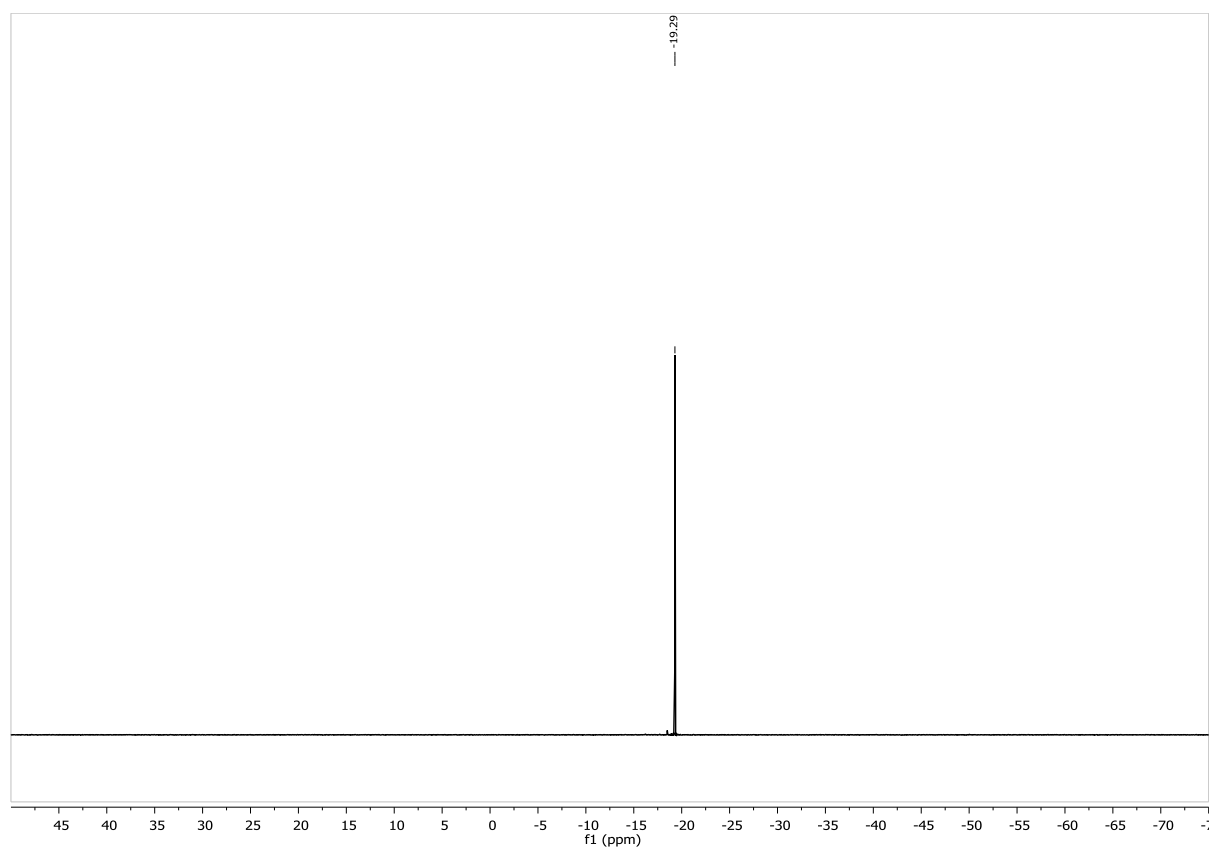

# Supporting Information

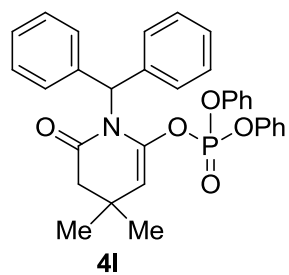

$^1\text{H}$  NMR, 400 MHz,  $\text{C}_6\text{D}_6$

▲ bisphosphate

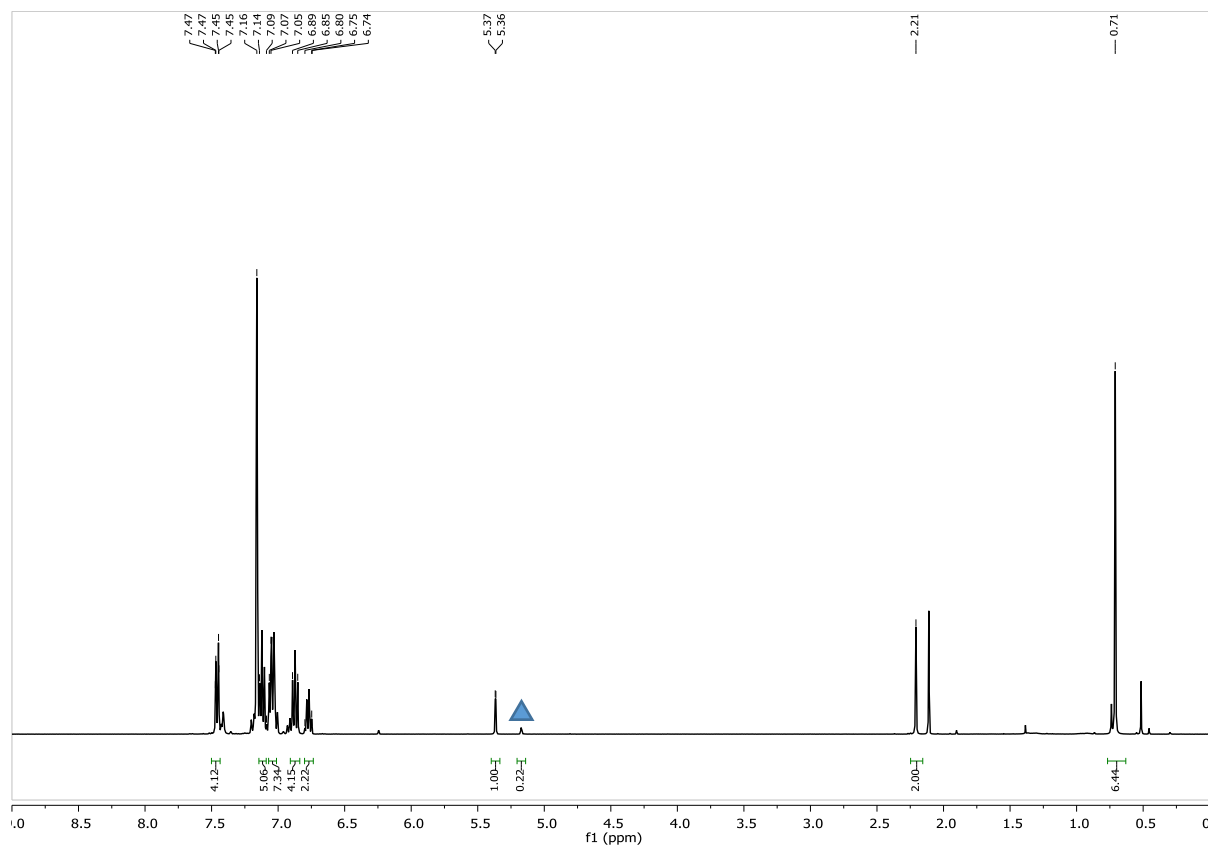

Supporting Information



$^{31}\text{P}\{^1\text{H}\}$  NMR, 162 MHz,  $\text{C}_6\text{D}_6$

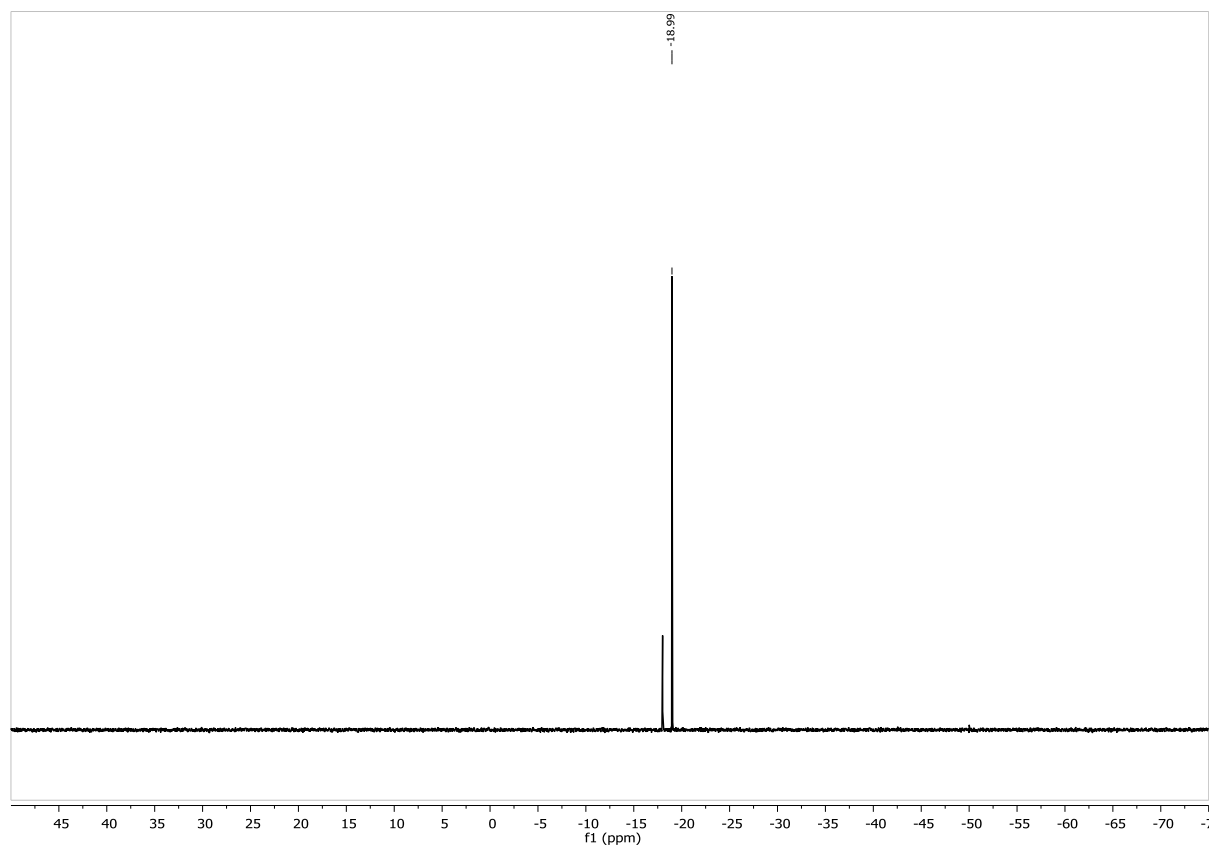

# Supporting Information

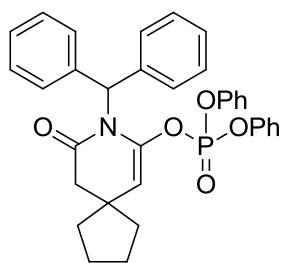

**4m**

$^1\text{H}$  NMR, 400 MHz,  $\text{C}_6\text{D}_6$

▲ bisphosphate

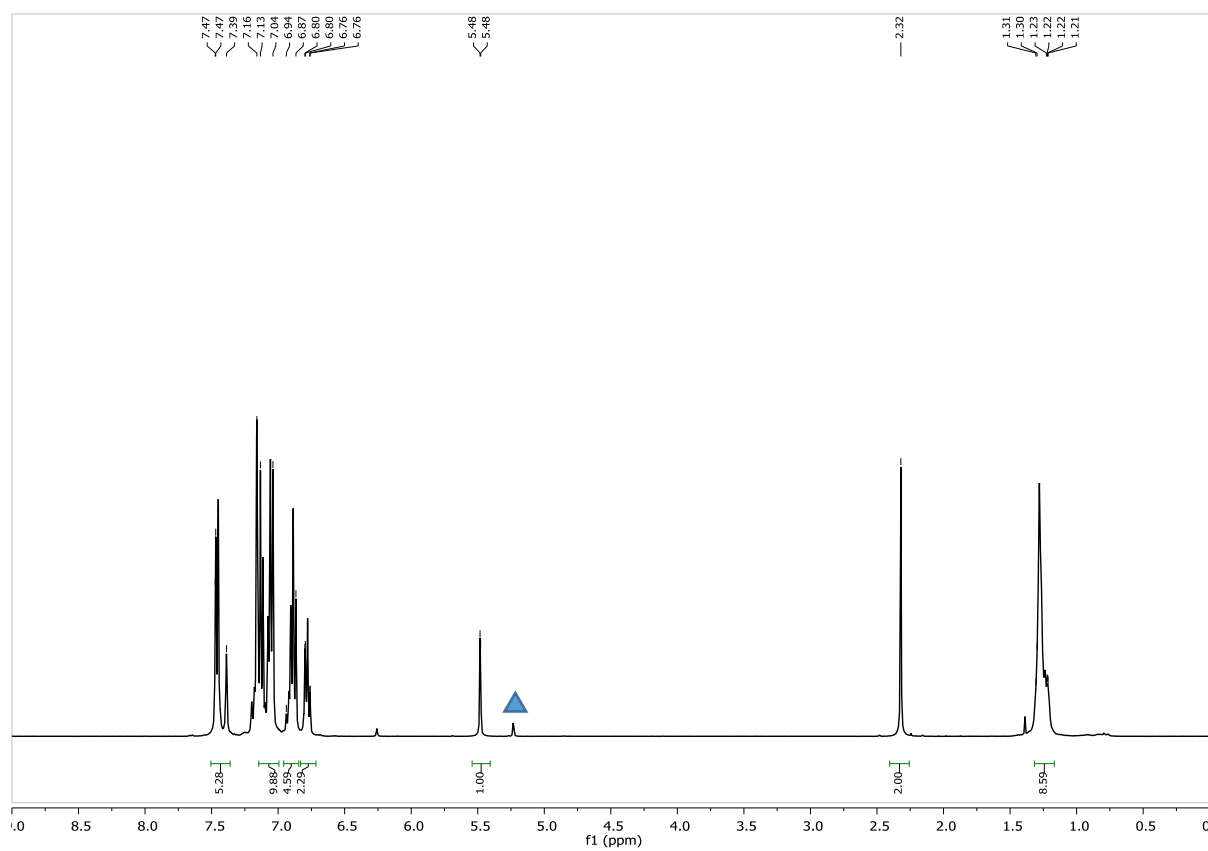

*Supporting Information*

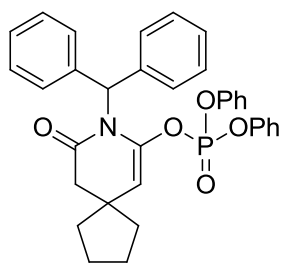

**4m**

$^{31}\text{P}\{^1\text{H}\}$  NMR, 162 MHz,  $\text{C}_6\text{D}_6$

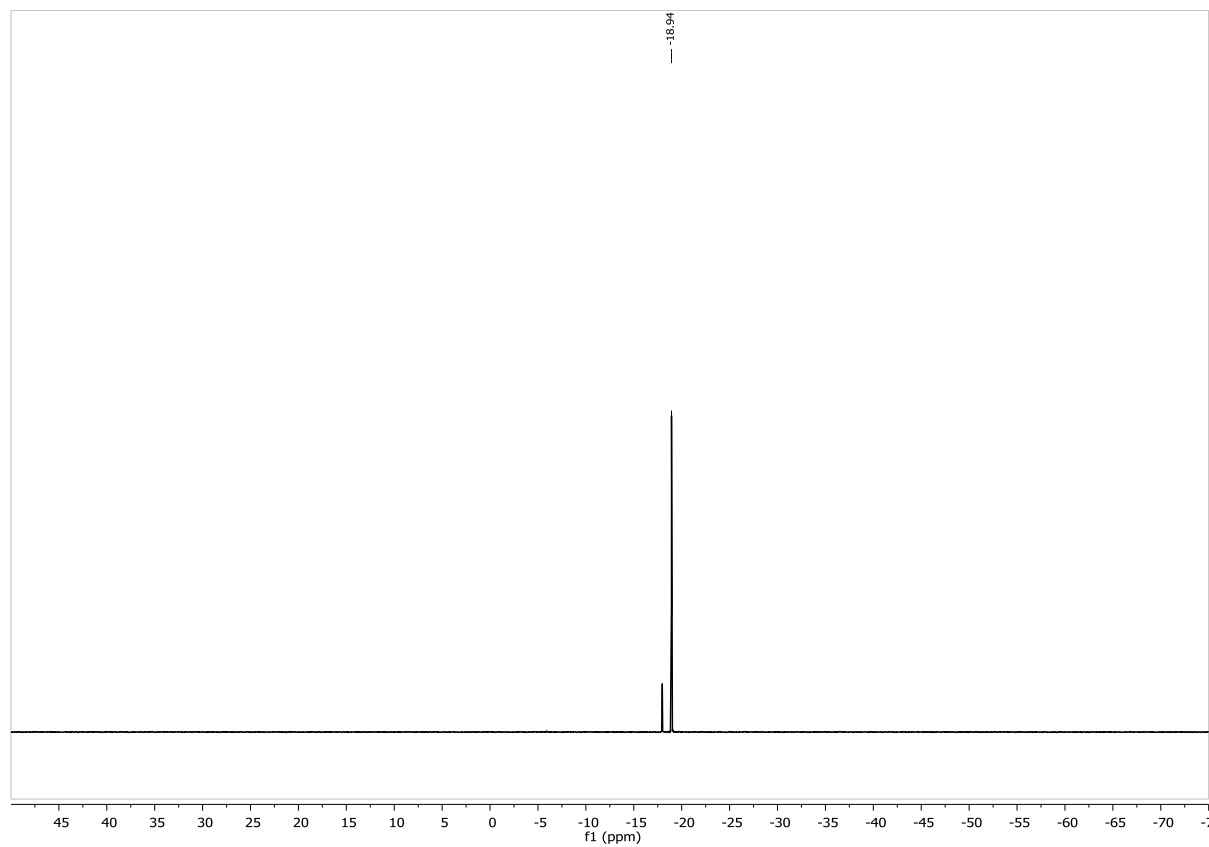



# Supporting Information

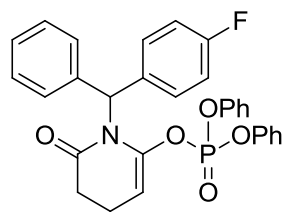

**4n**

$^1\text{H}$  NMR, 400 MHz,  $\text{C}_6\text{D}_6$

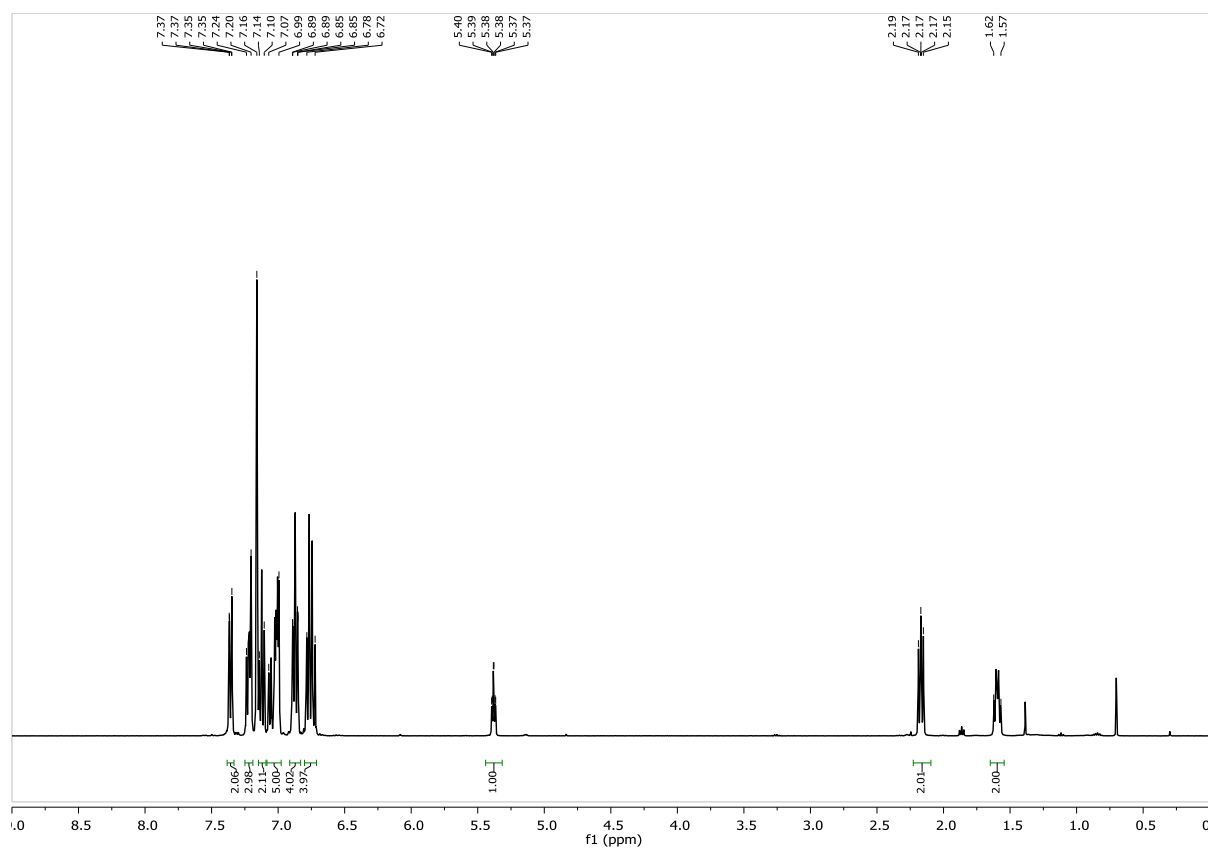

Supporting Information

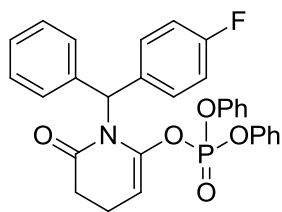

**4n**

$^{13}\text{C}\{^1\text{H}\}$  NMR, 151 MHz,  $\text{C}_6\text{D}_6$

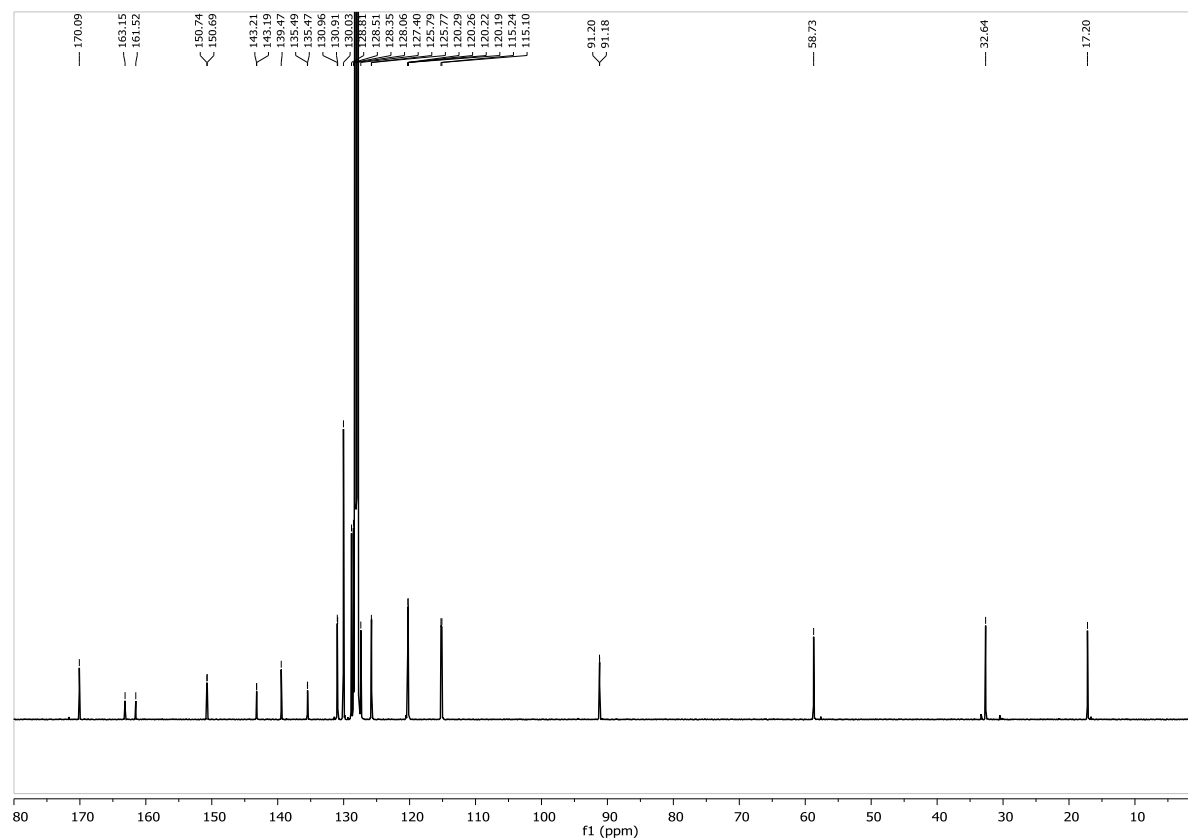

Supporting Information

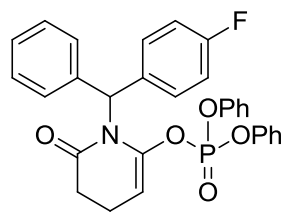

**4n**

$^{19}\text{F}\{^1\text{H}\}$  NMR, 376 MHz,  $\text{C}_6\text{D}_6$

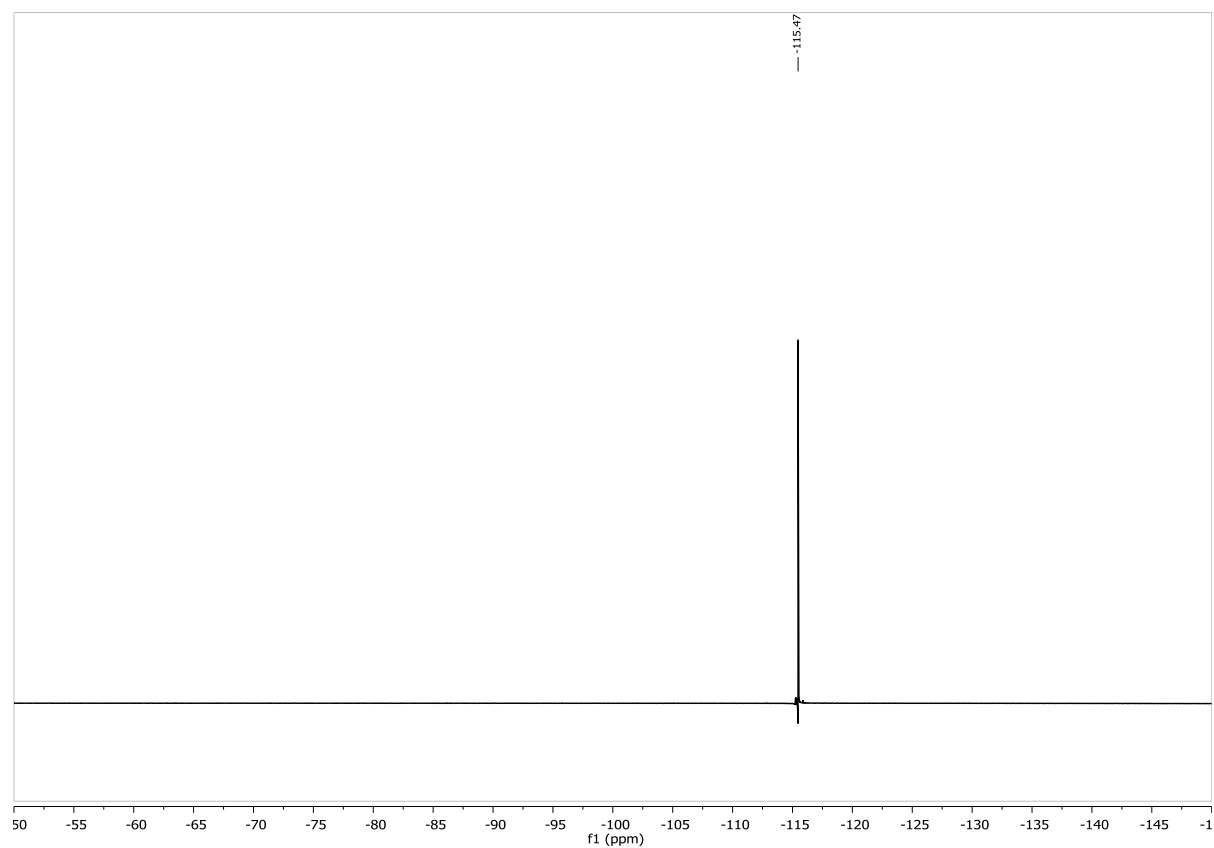

Supporting Information



**4n**

$^{31}\text{P}\{^1\text{H}\}$  NMR, 162 MHz,  $\text{C}_6\text{D}_6$

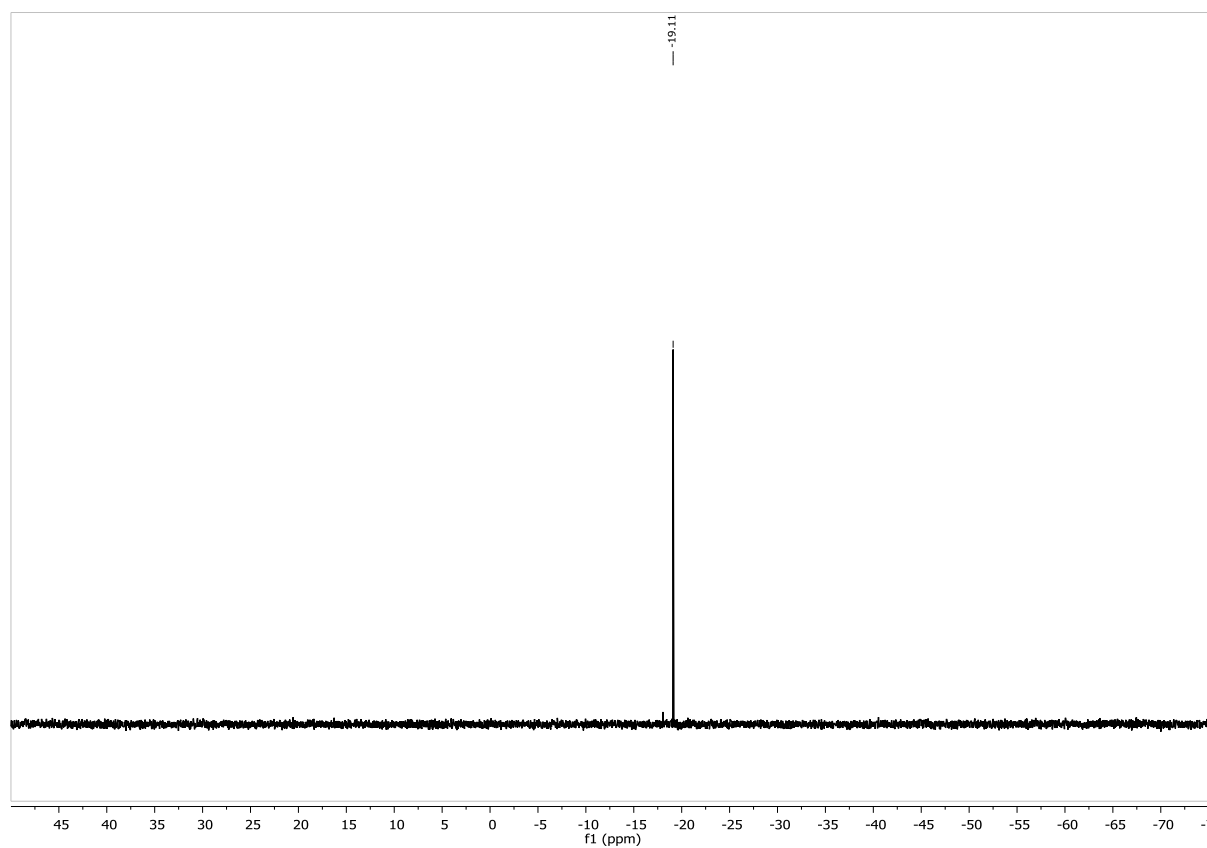

Supporting Information

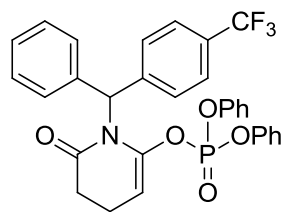

**4o**

$^1\text{H}$  NMR, 400 MHz,  $\text{C}_6\text{D}_6$

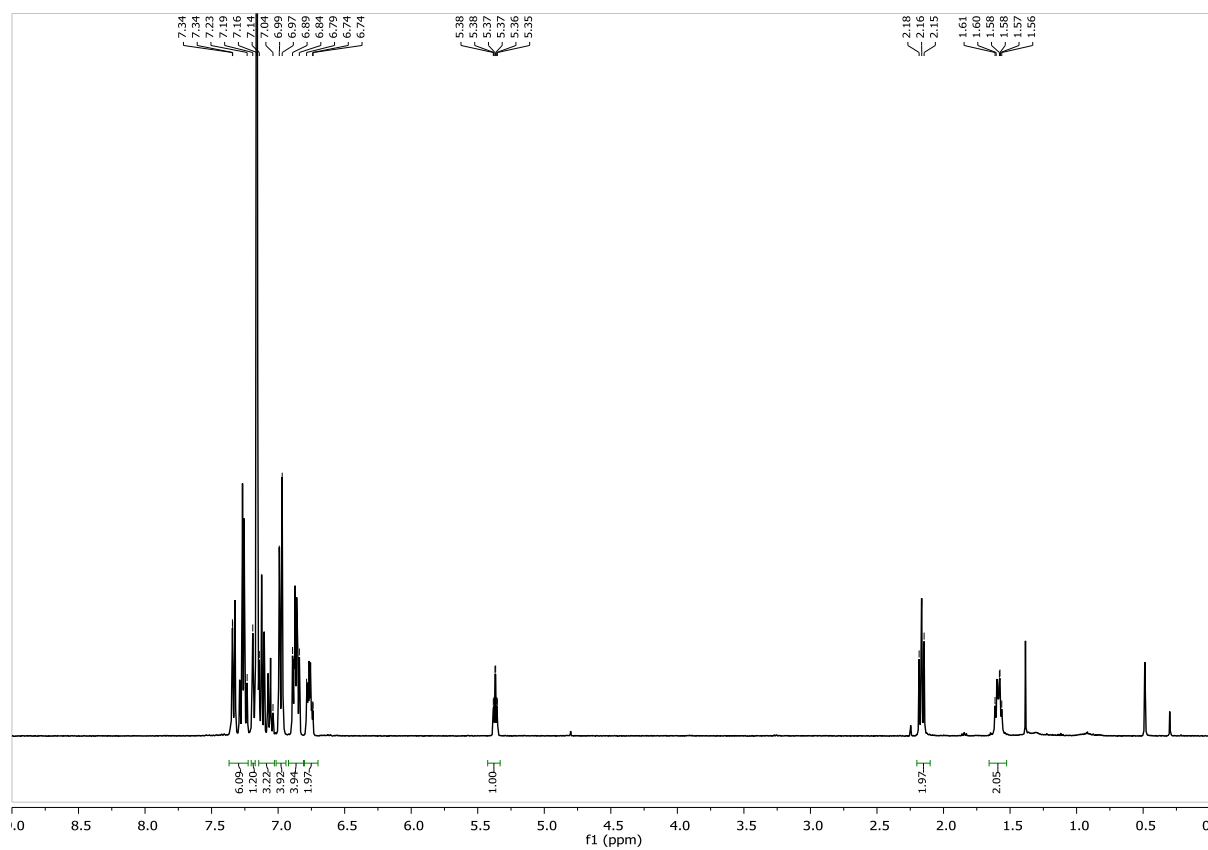

Supporting Information

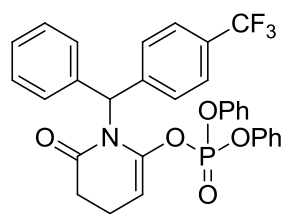

**4o**

$^{19}\text{F}\{^1\text{H}\}$  NMR, 376 MHz,  $\text{C}_6\text{D}_6$

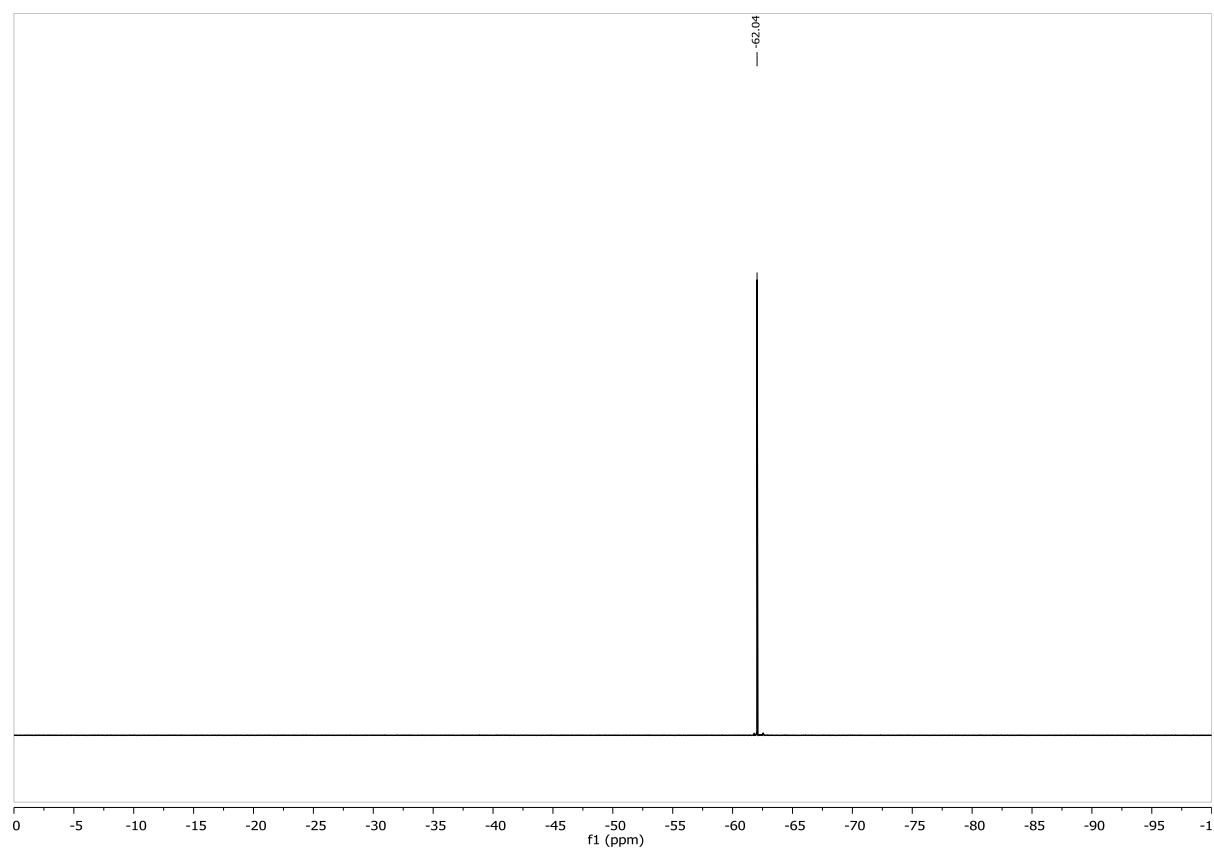

*Supporting Information*



**4o**

$^{31}\text{P}\{^1\text{H}\}$  NMR, 162 MHz,  $\text{C}_6\text{D}_6$

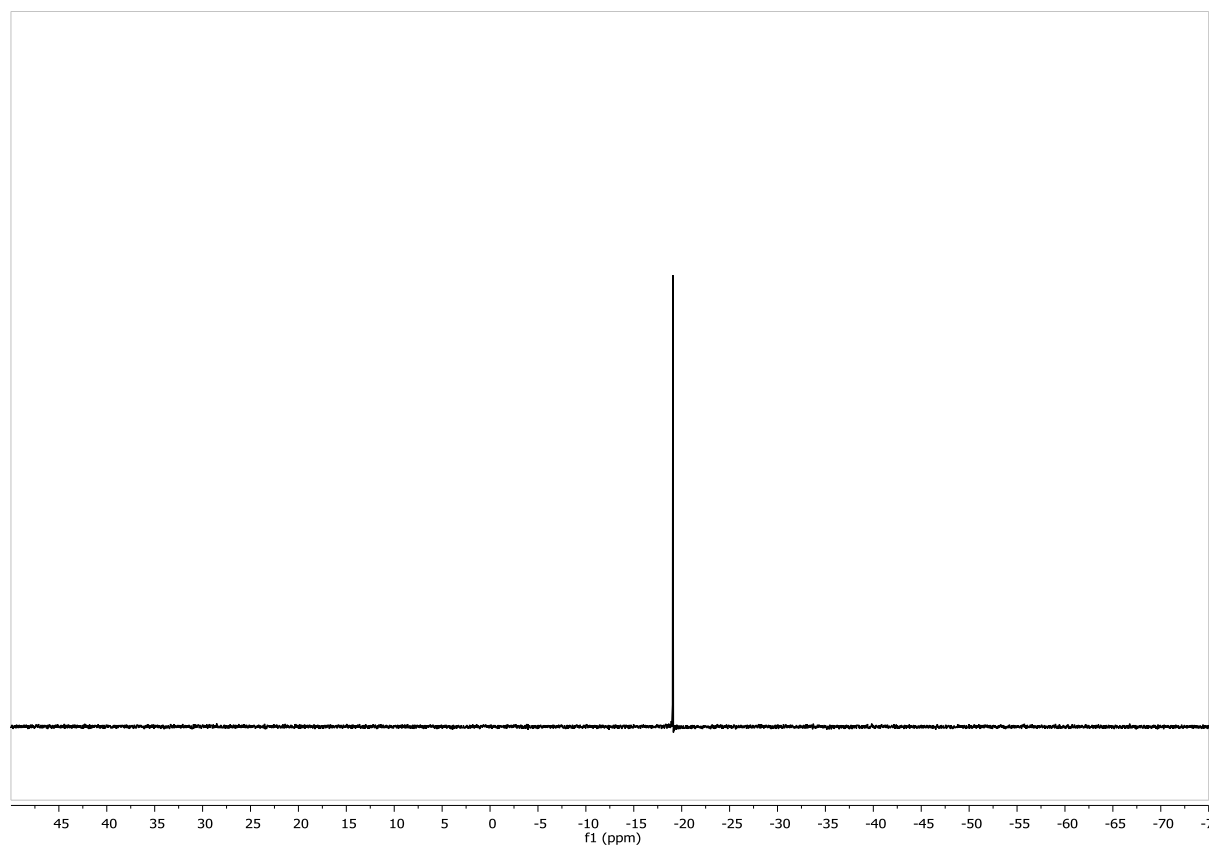

Supporting Information

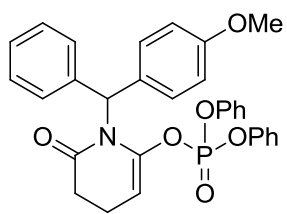

**4p**

$^1\text{H}$  NMR, 400 MHz,  $\text{C}_6\text{D}_6$

▲ starting material

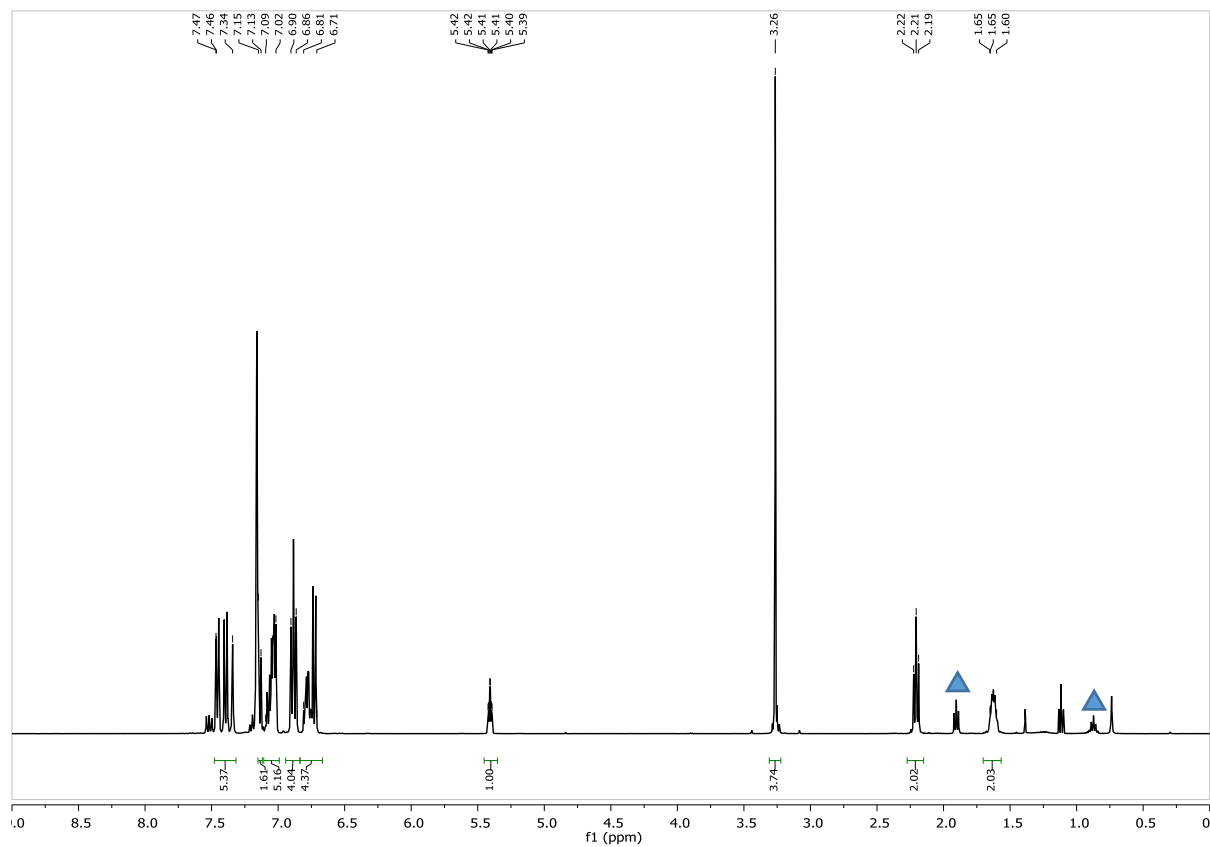



Supporting Information

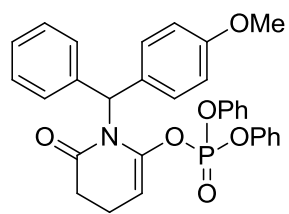

**4p**

$^{31}\text{P}\{^1\text{H}\}$  NMR, 162 MHz,  $\text{C}_6\text{D}_6$

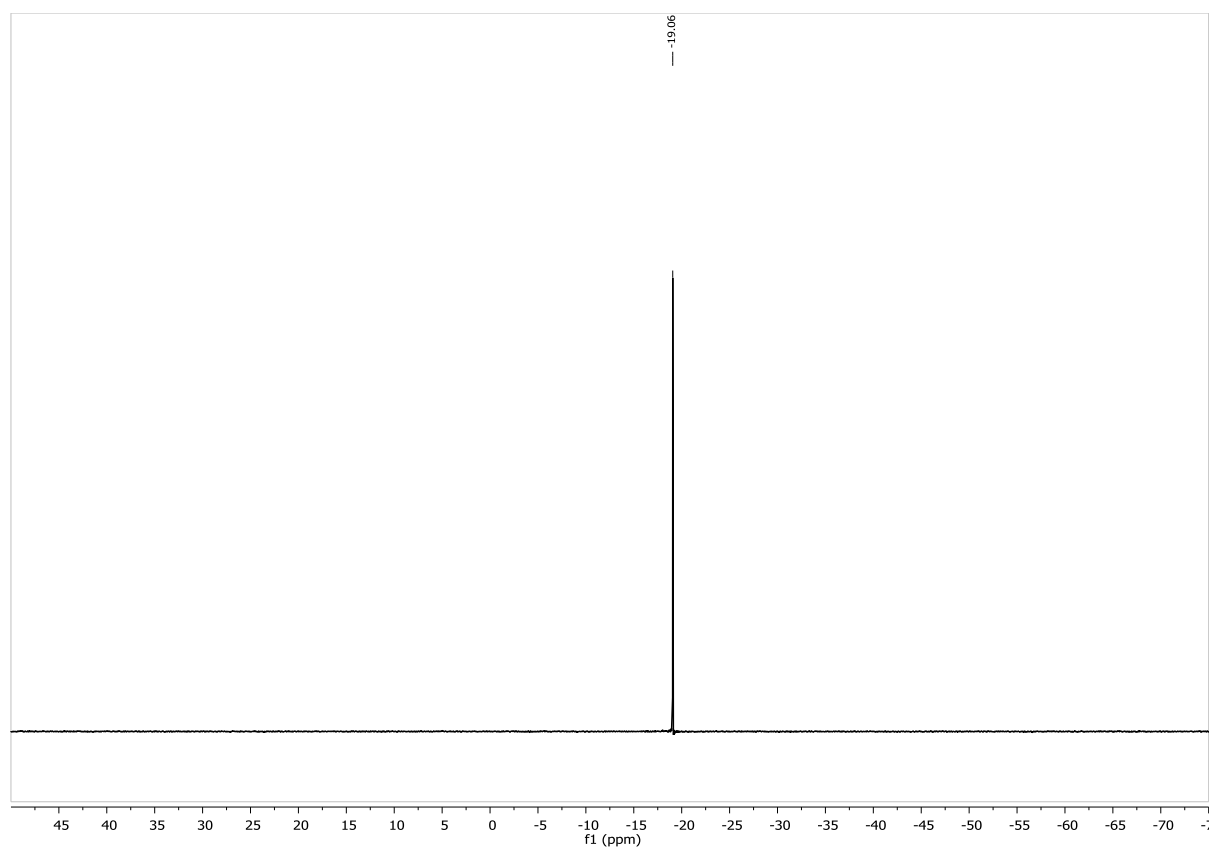

Supporting Information

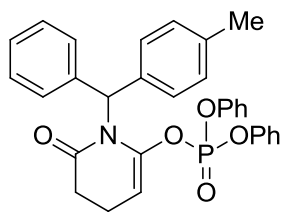

**4r**

$^1\text{H}$  NMR, 400 MHz,  $\text{C}_6\text{D}_6$

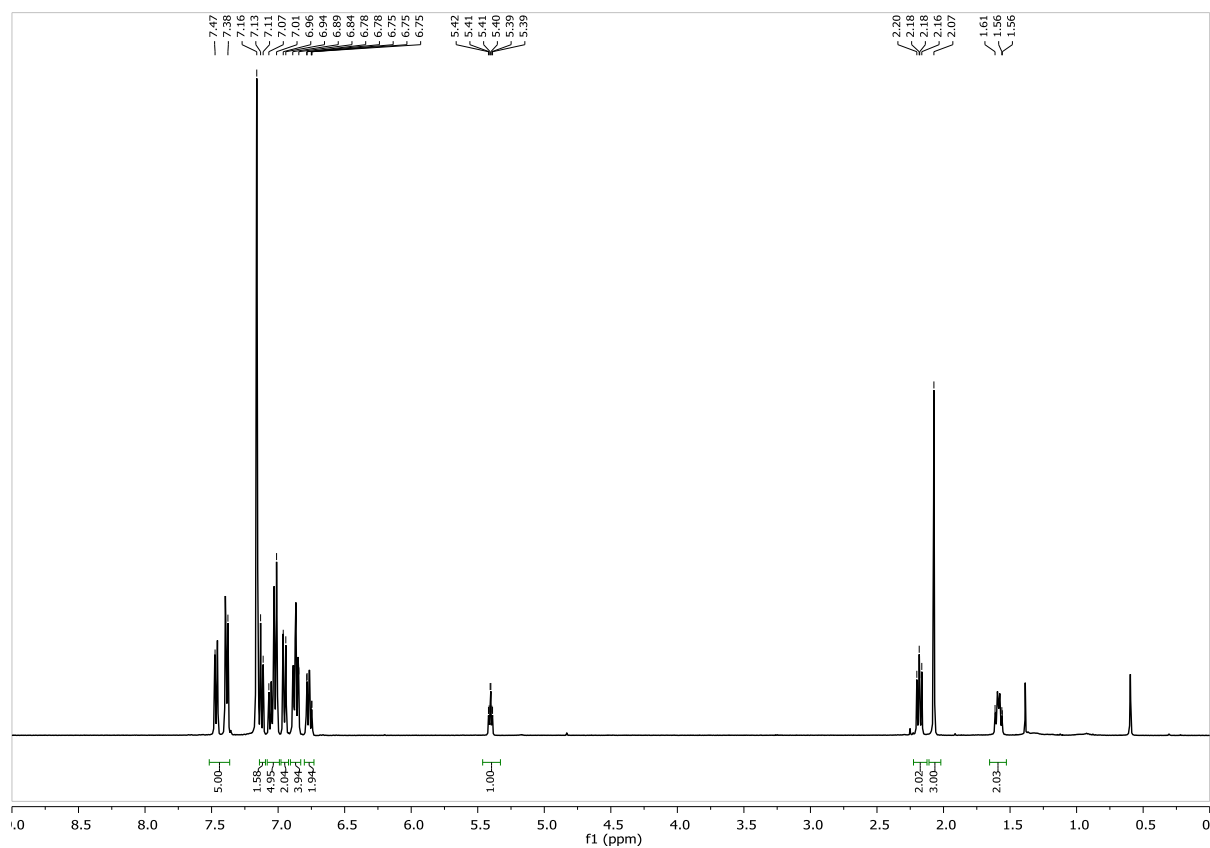

Supporting Information

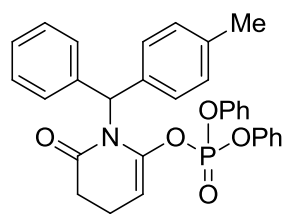

**4r**

$^{31}\text{P}\{^1\text{H}\}$  NMR, 162 MHz,  $\text{C}_6\text{D}_6$

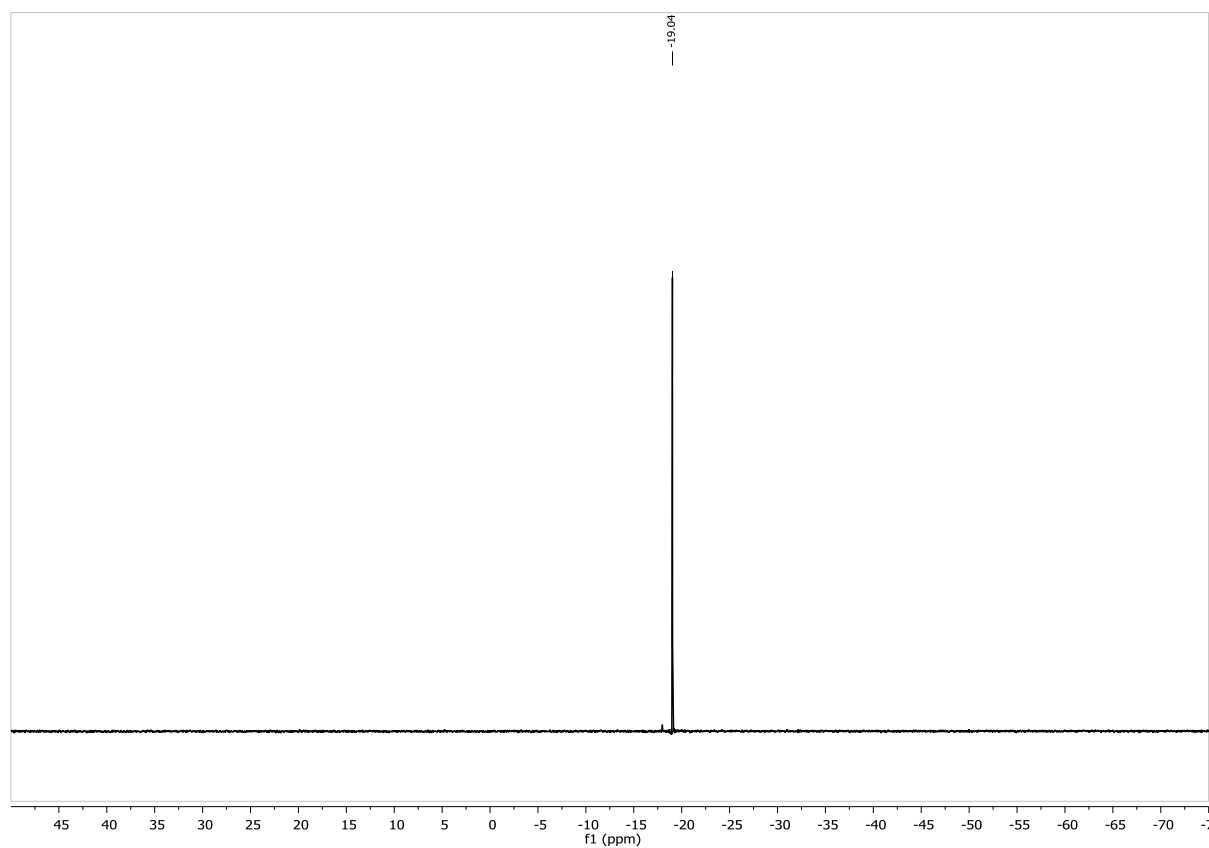

Supporting Information

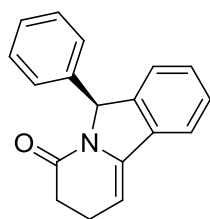

**5a**

$^1\text{H}$  NMR, 400 MHz,  $\text{C}_6\text{D}_6$

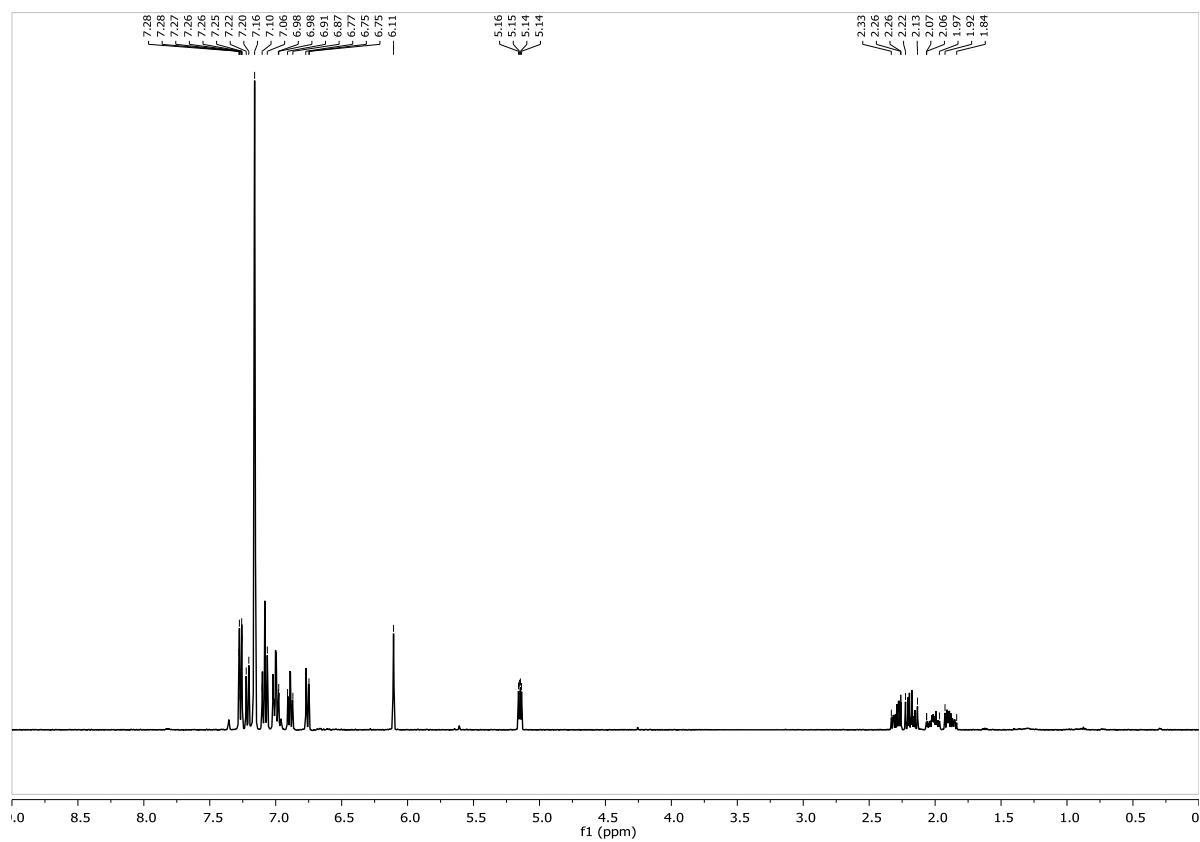

Supporting Information

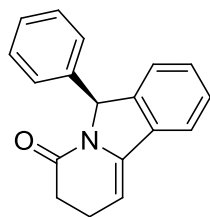

**5a**

$^{13}\text{C}\{^1\text{H}\}$  NMR, 101 MHz,  $\text{C}_6\text{D}_6$

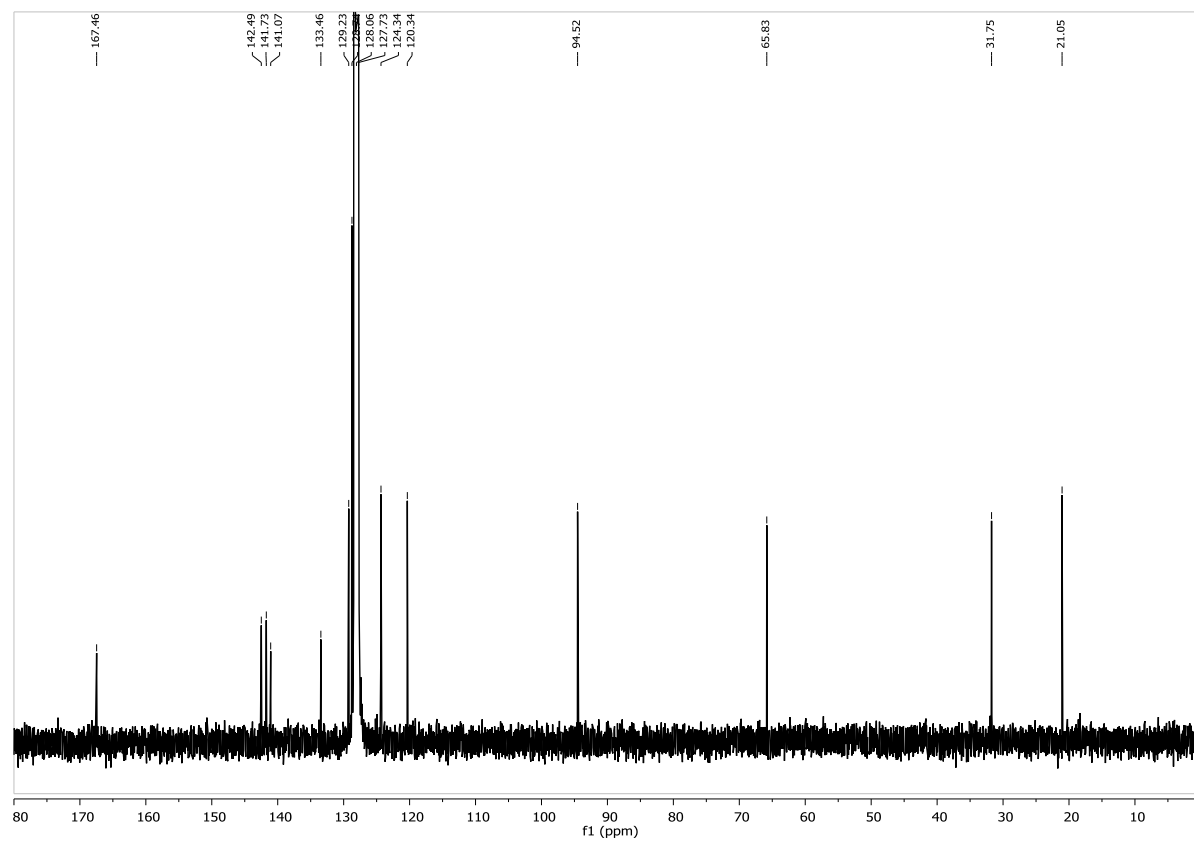

Supporting Information

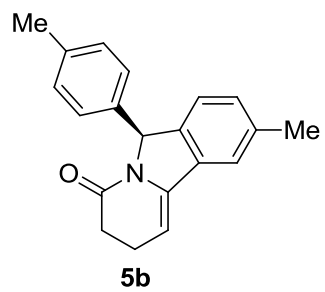

$^1\text{H}$  NMR, 400 MHz,  $\text{C}_6\text{D}_6$

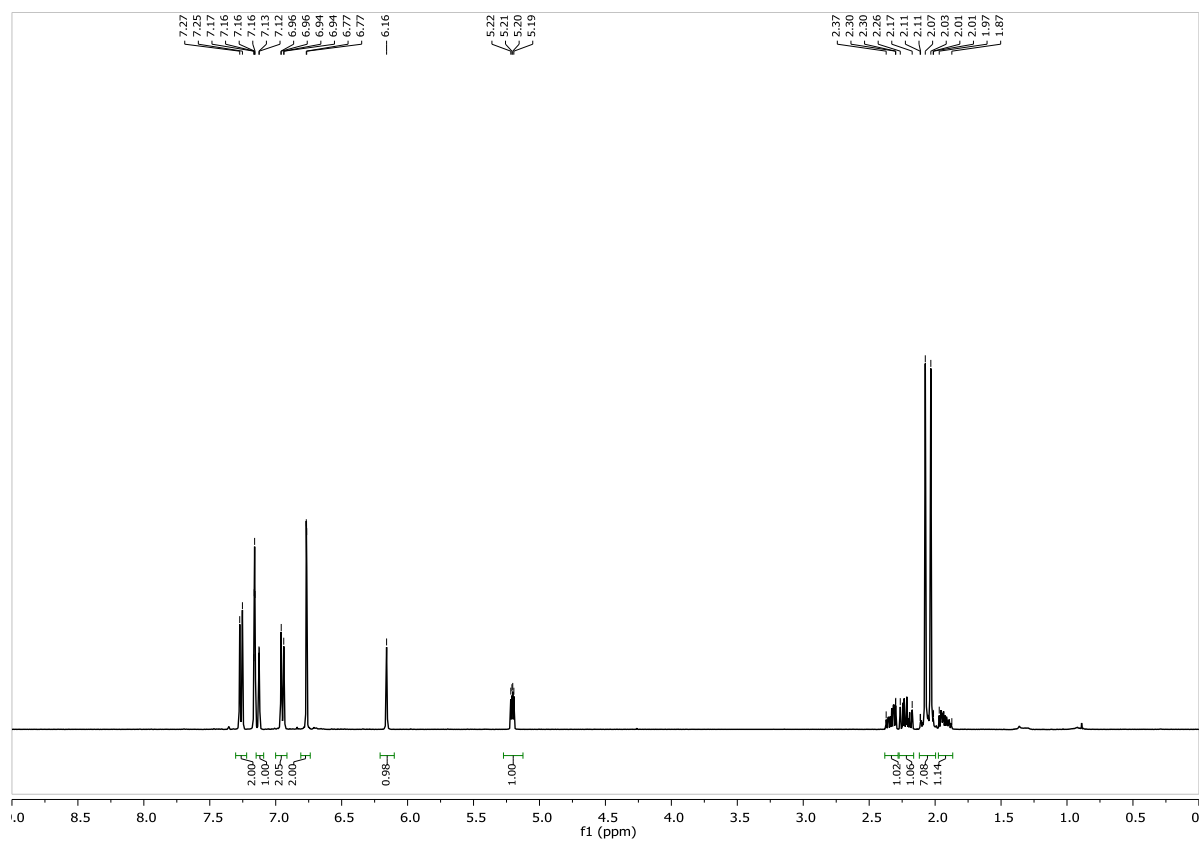

Supporting Information

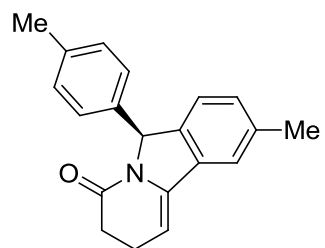

**5b**  
 $^{13}\text{C}\{^1\text{H}\}$  NMR, 101 MHz,  $\text{C}_6\text{D}_6$

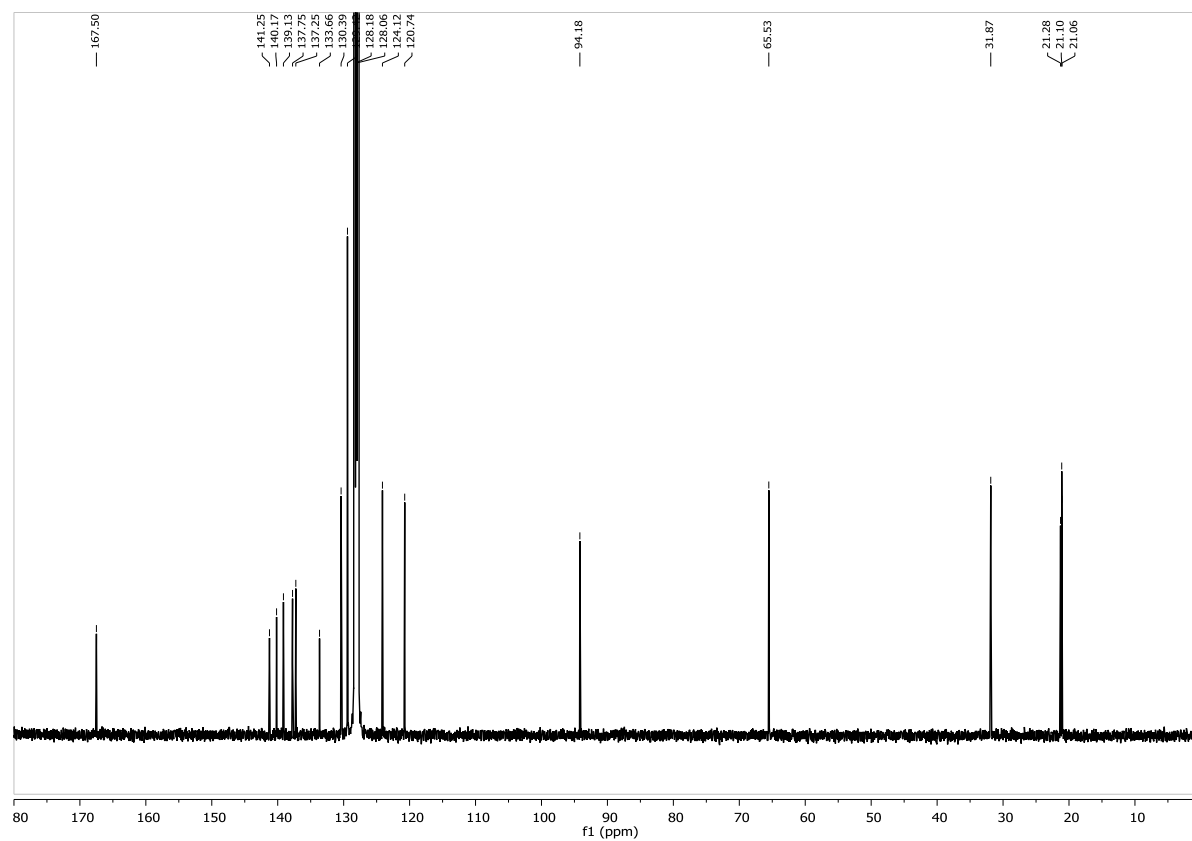

# Supporting Information

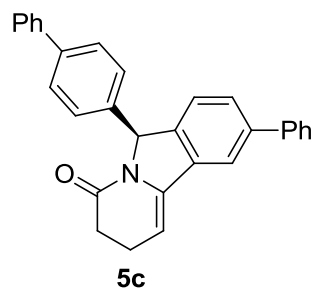

$^1\text{H}$  NMR, 600 MHz,  $\text{C}_6\text{D}_6$

▲ 4-methoxyphenol

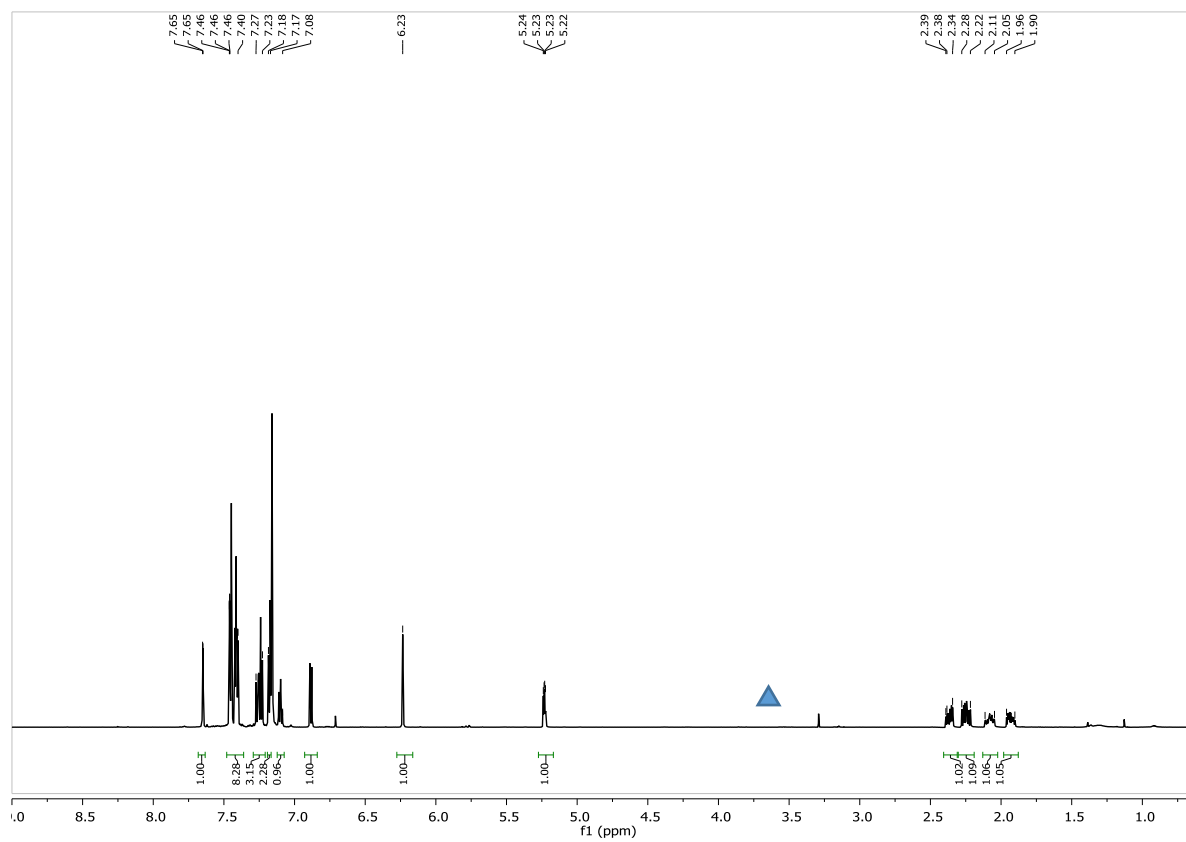



Supporting Information



$^{13}\text{C}\{^1\text{H}\}$  NMR, 151 MHz,  $\text{C}_6\text{D}_6$

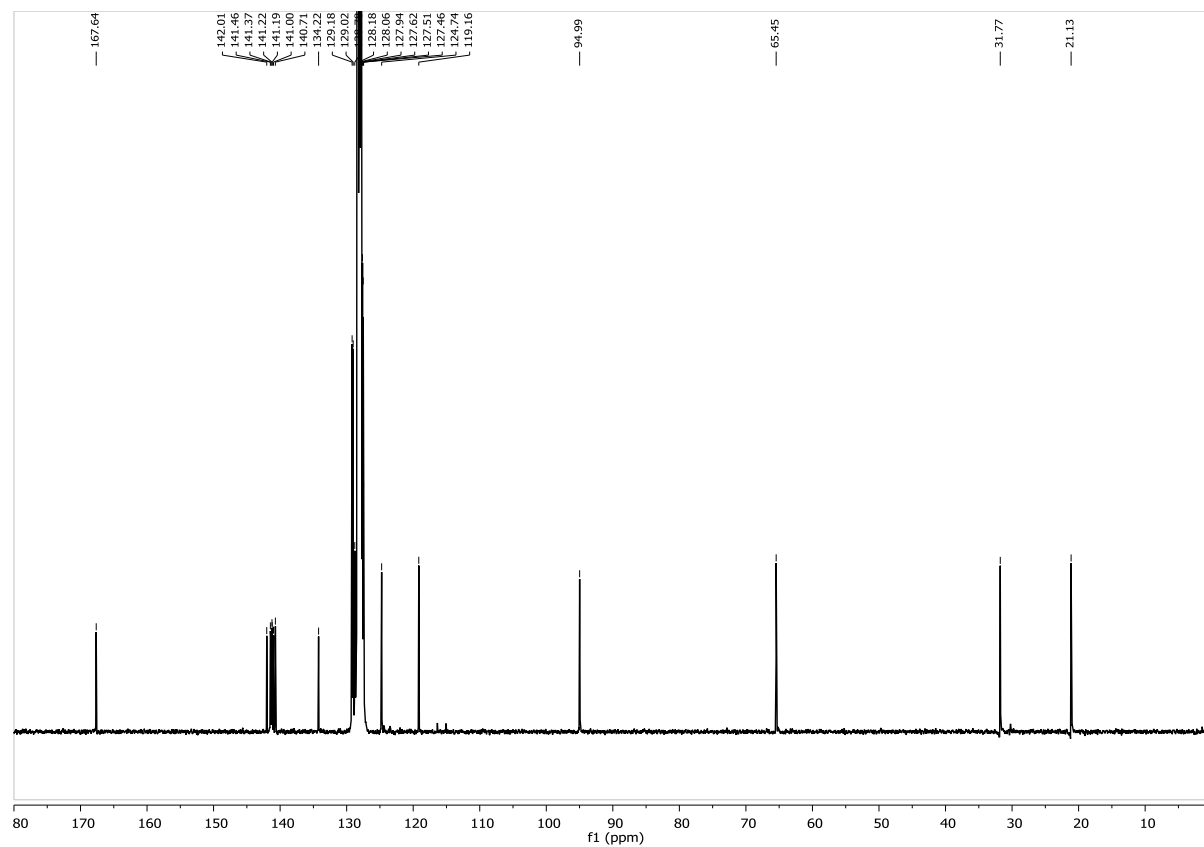

Supporting Information

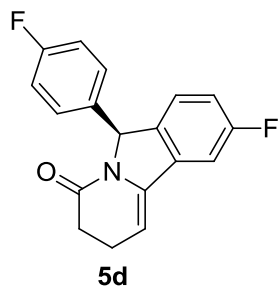

$^1\text{H}$  NMR, 400 MHz,  $\text{C}_6\text{D}_6$

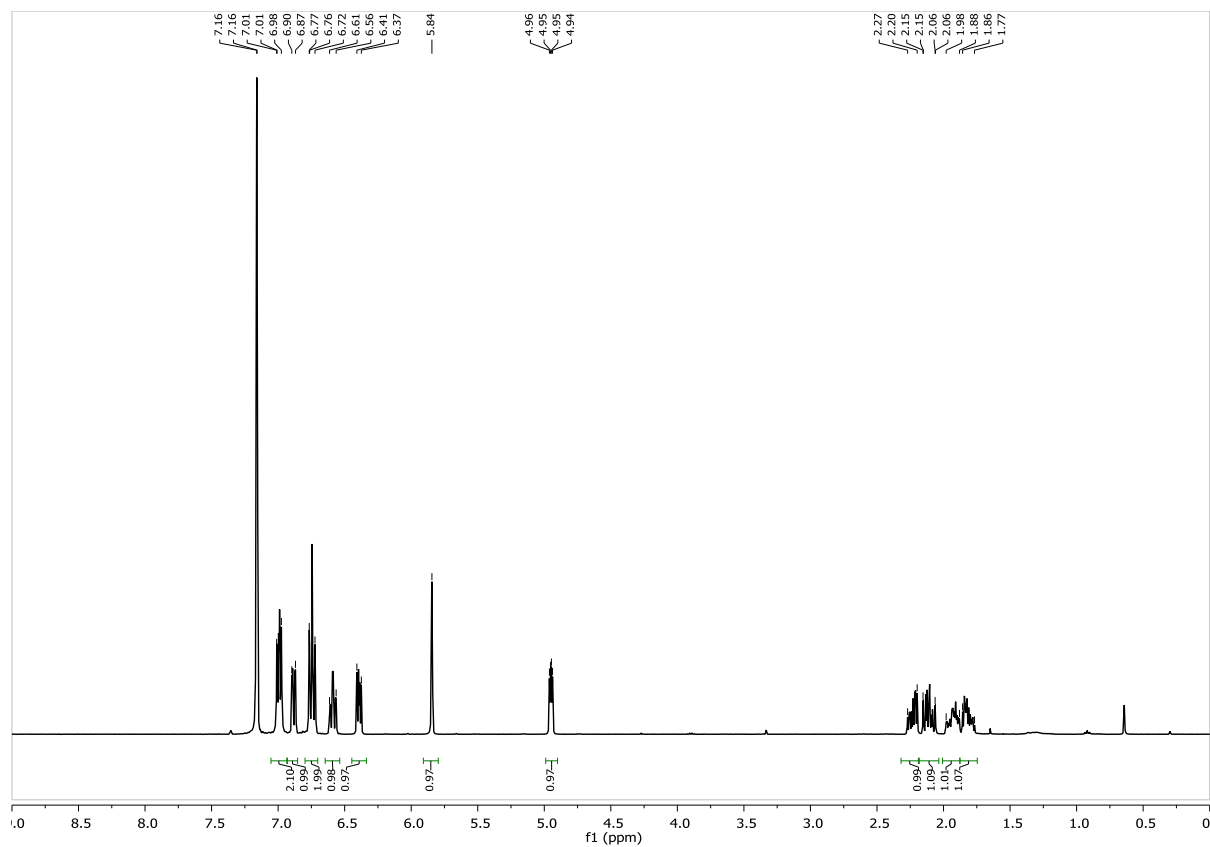

Supporting Information

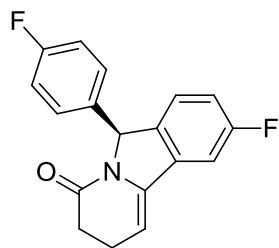

**5d**

$^{13}\text{C}\{^1\text{H}\}$  NMR, 151 MHz,  $\text{C}_6\text{D}_6$

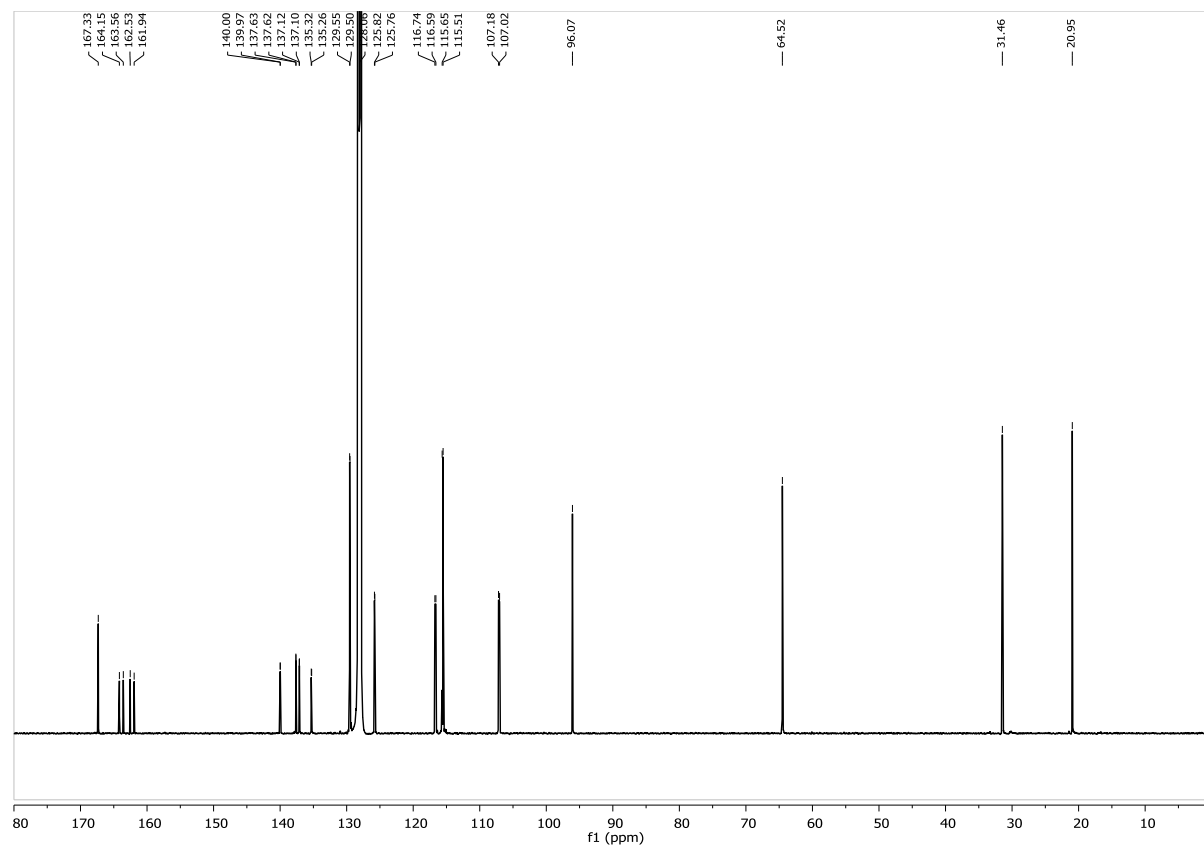

*Supporting Information*



$^{19}\text{F}\{^1\text{H}\}$  NMR, 376 MHz,  $\text{C}_6\text{D}_6$

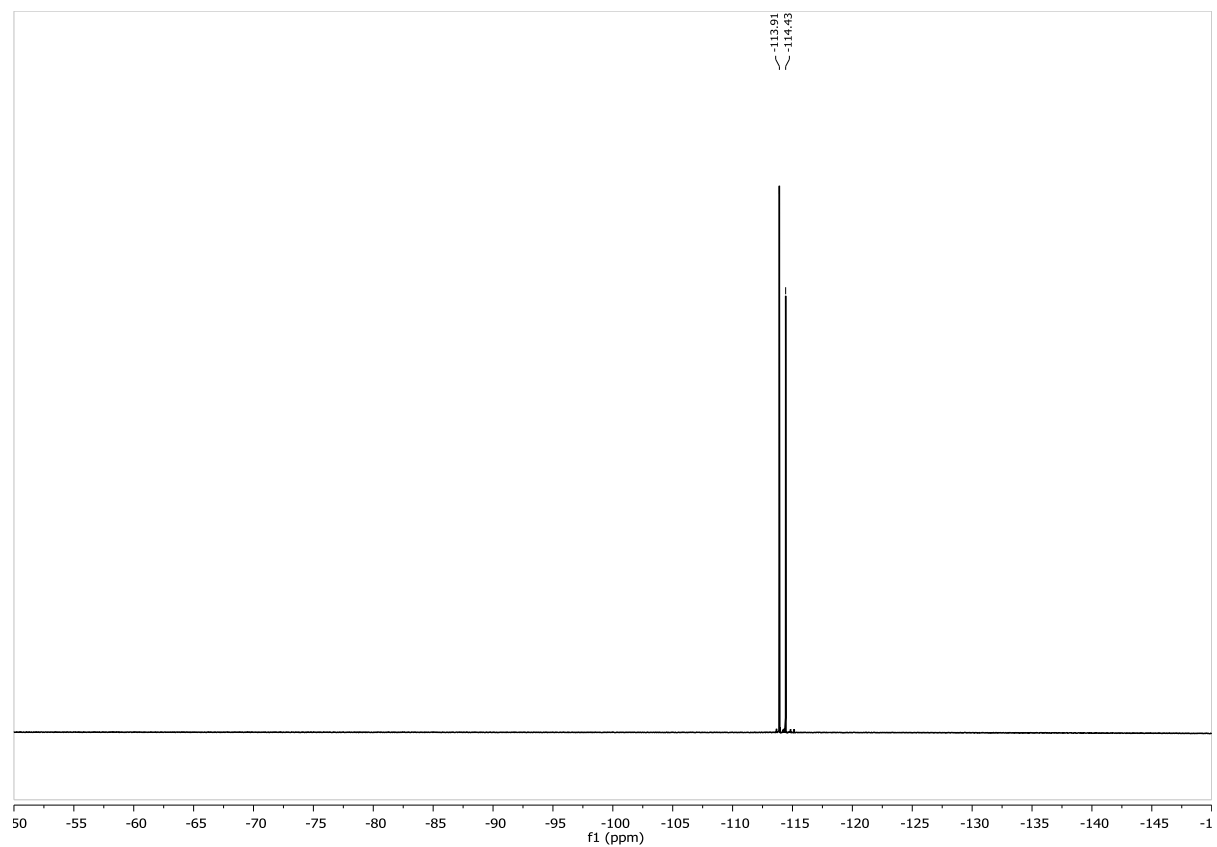

Supporting Information

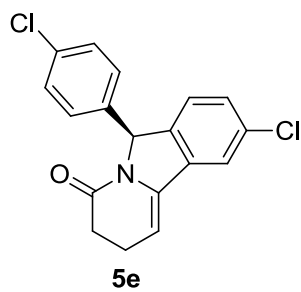

$^1\text{H}$  NMR, 600 MHz,  $\text{C}_6\text{D}_6$

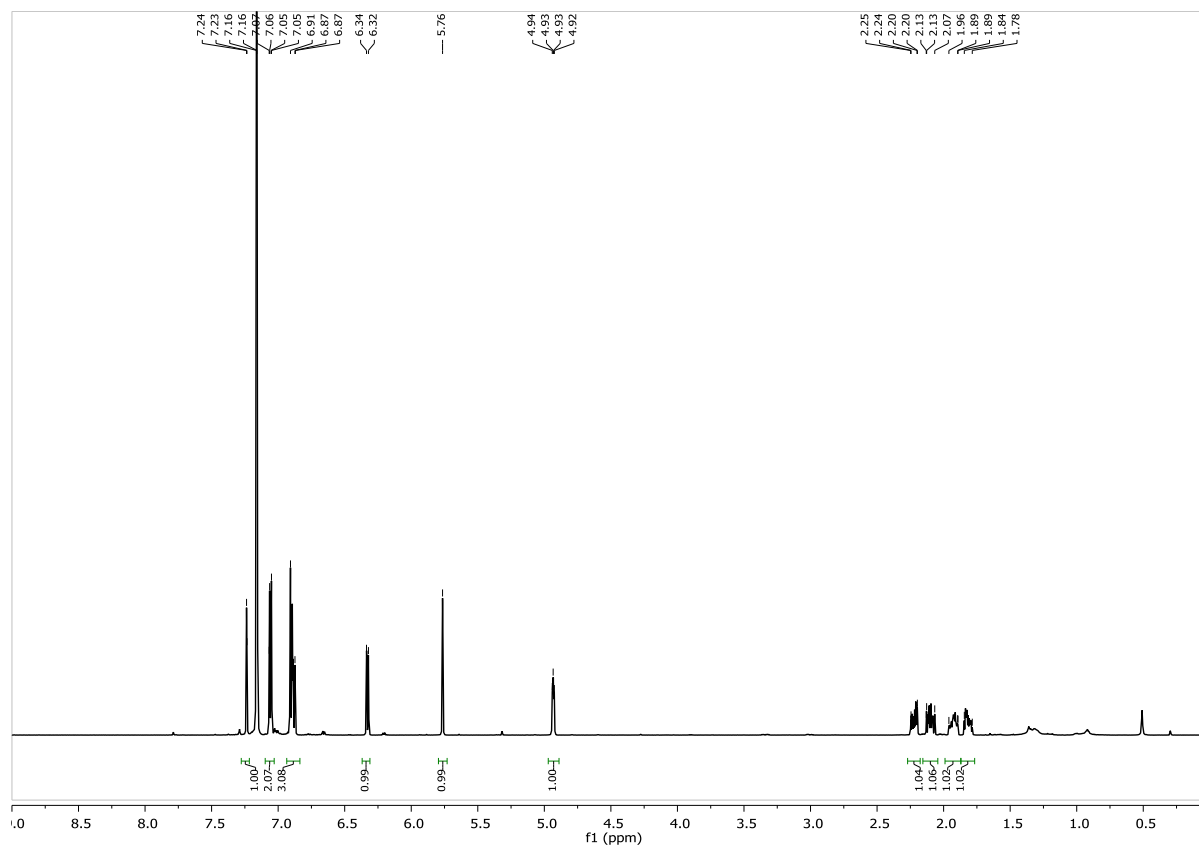

Supporting Information



**5e**  
 $^{13}\text{C}\{^1\text{H}\}$  NMR, 151 MHz,  $\text{C}_6\text{D}_6$

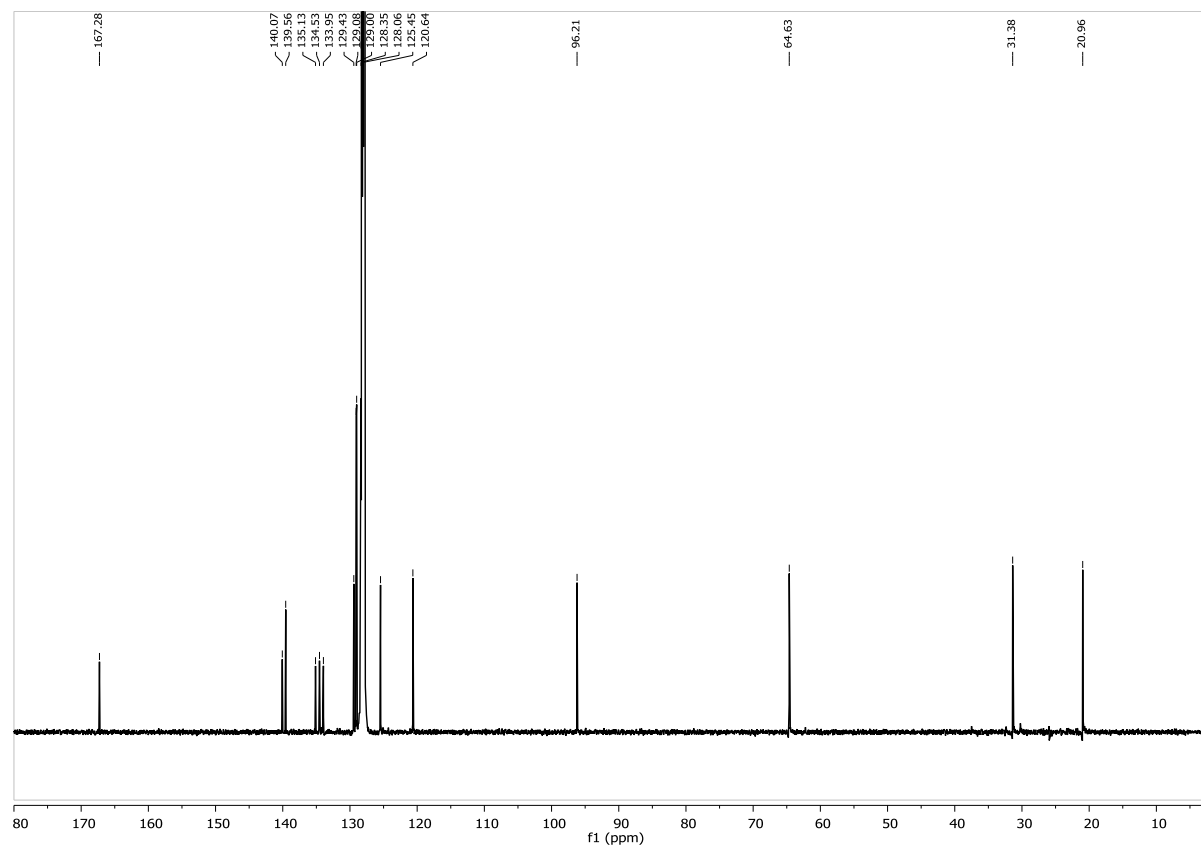

Supporting Information

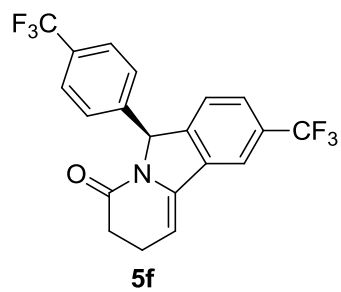

$^1\text{H}$  NMR, 400 MHz,  $\text{C}_6\text{D}_6$

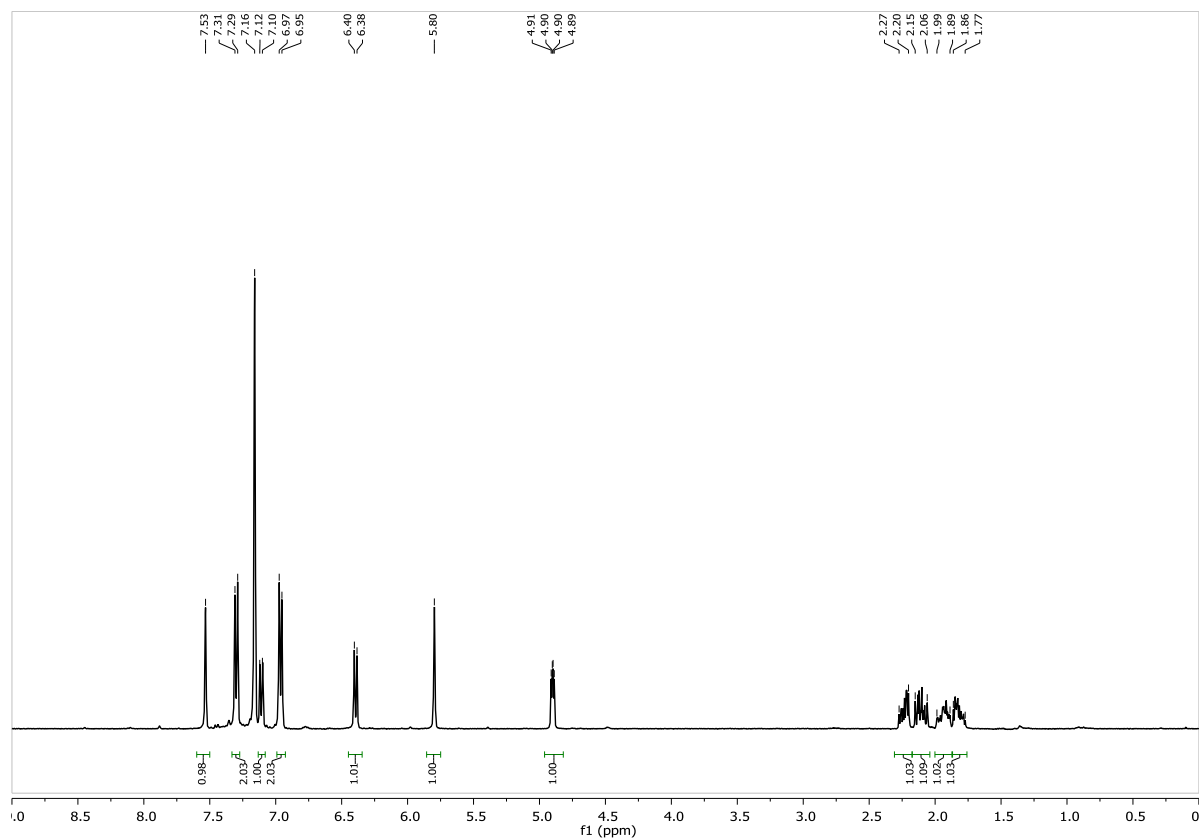

Supporting Information



$^{13}\text{C}\{^1\text{H}\}$  NMR, 101 MHz,  $\text{C}_6\text{D}_6$

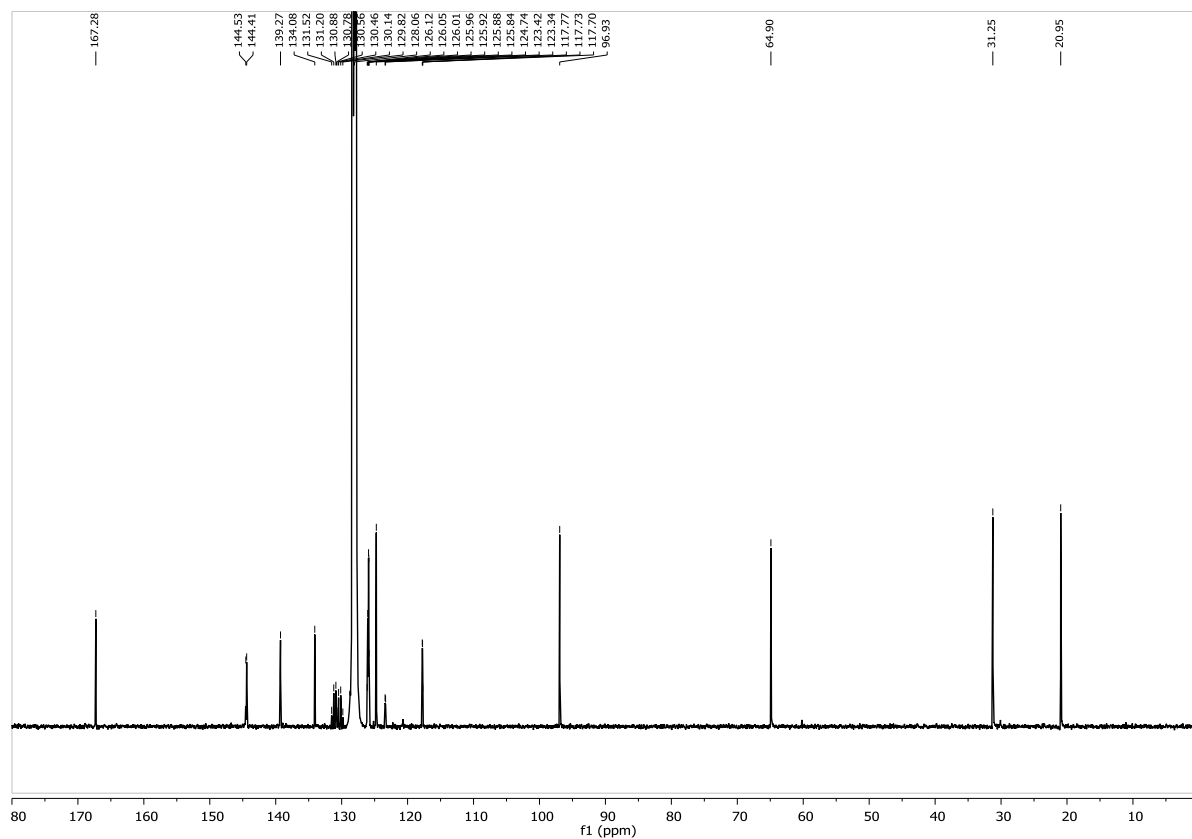



*Supporting Information*



**5f**  
<sup>19</sup>F{<sup>1</sup>H} NMR, 376 MHz, C<sub>6</sub>D<sub>6</sub>

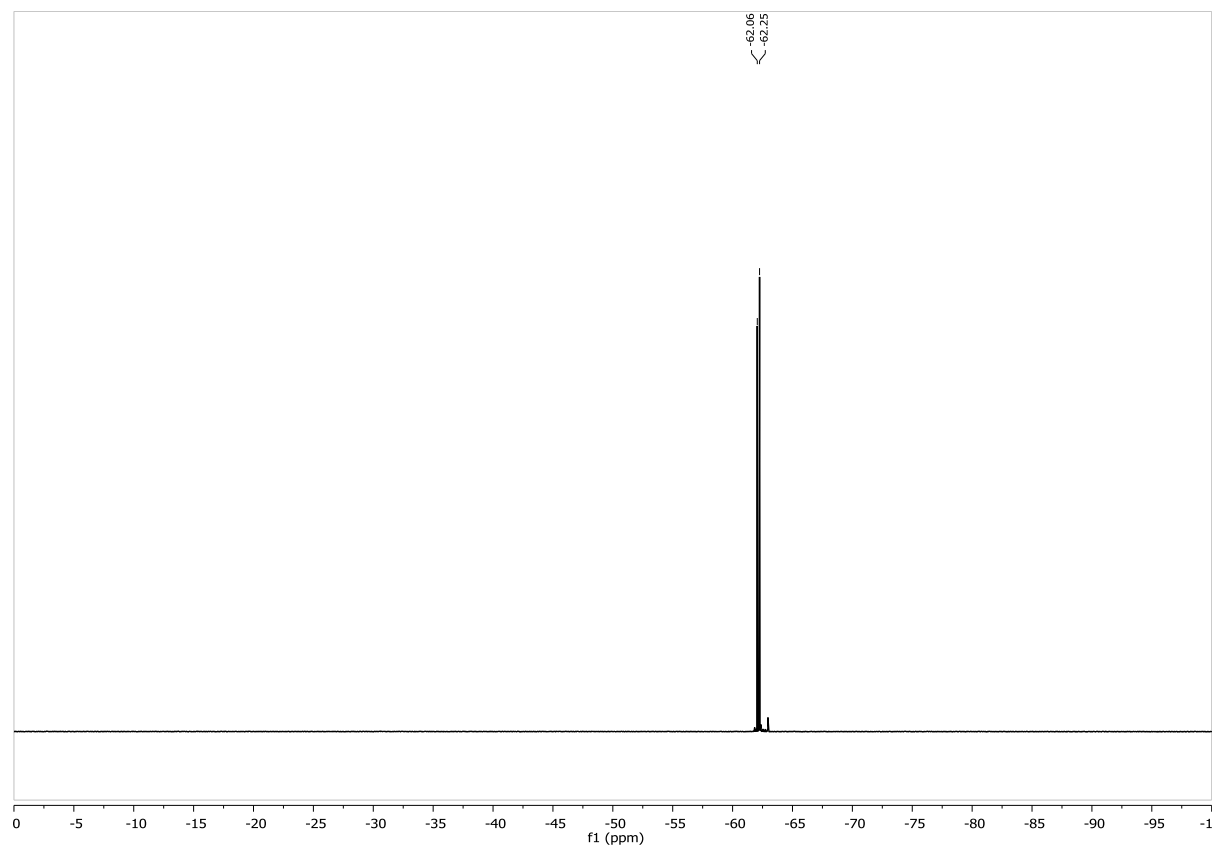

Supporting Information

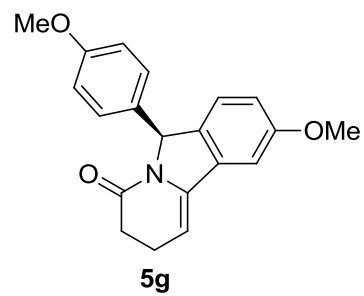

$^1\text{H}$  NMR, 400 MHz,  $\text{C}_6\text{D}_6$

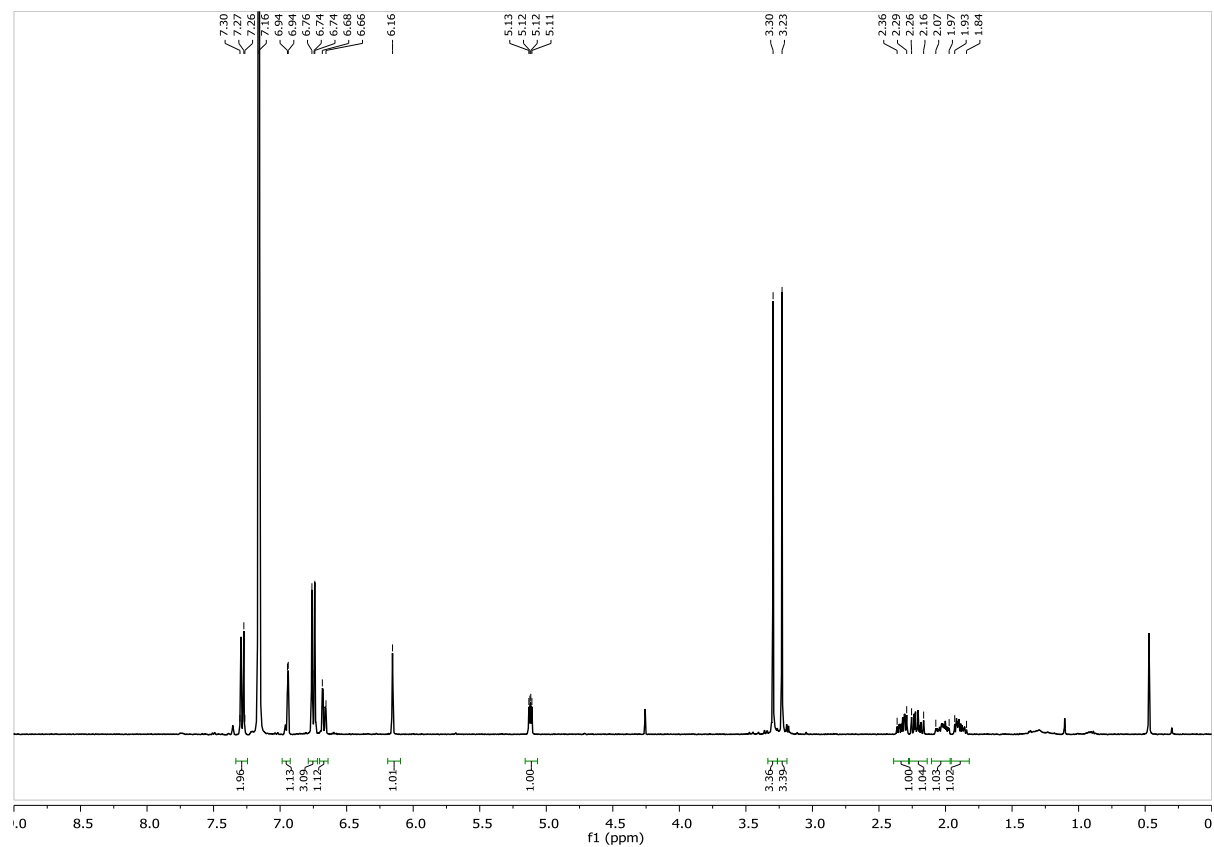

Supporting Information

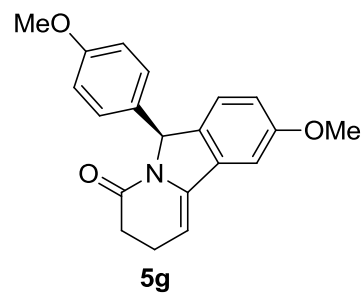

$^{13}\text{C}\{^1\text{H}\}$  NMR, 151 MHz,  $\text{C}_6\text{D}_6$

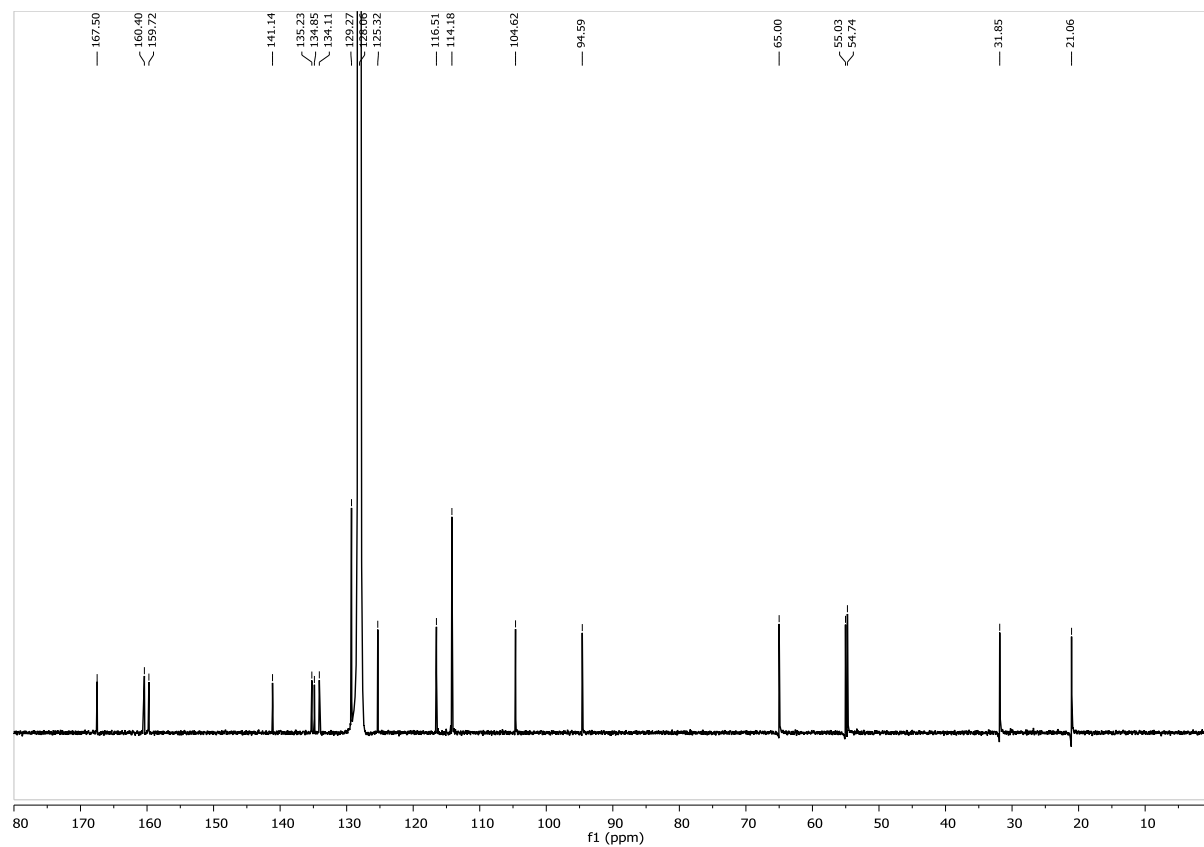

Supporting Information

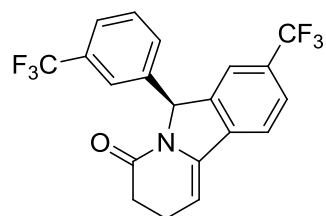

**5h**

$^1\text{H}$  NMR, 400 MHz,  $\text{C}_6\text{D}_6$

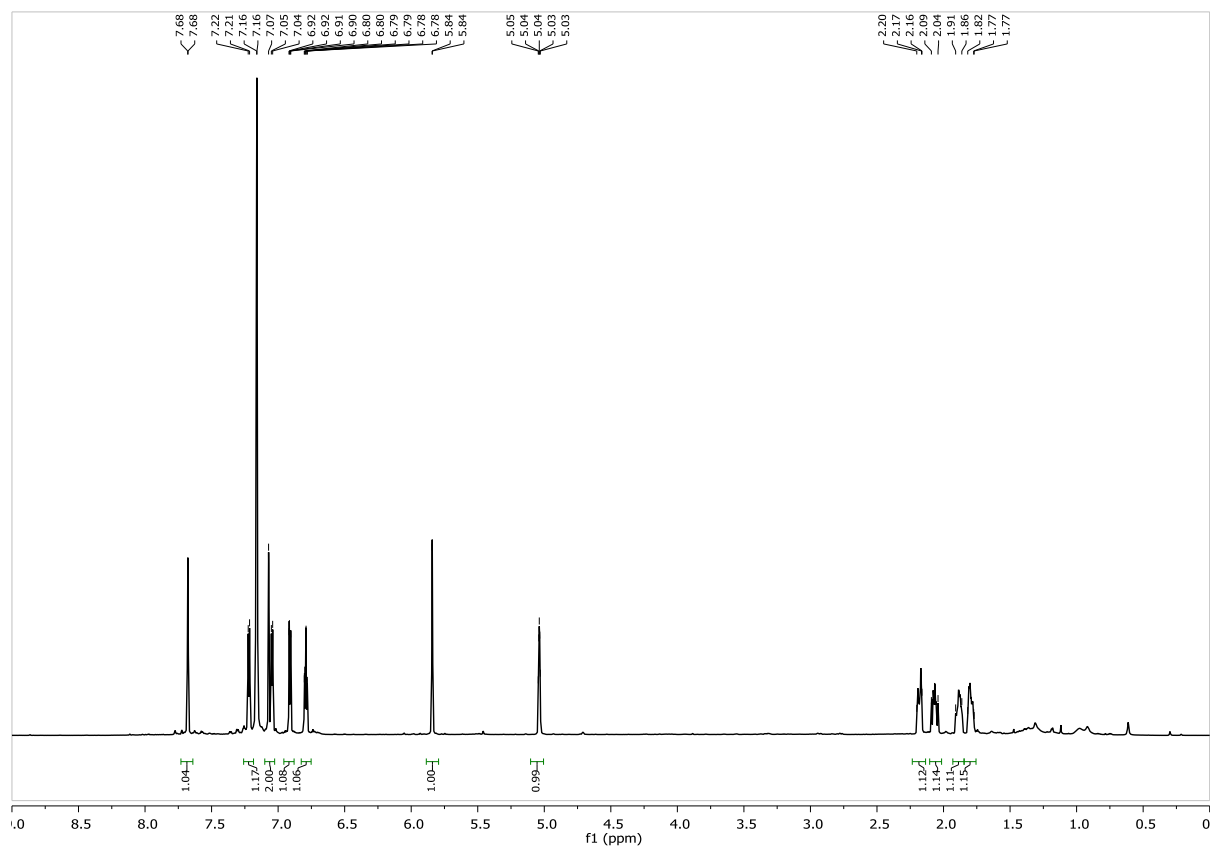

Supporting Information

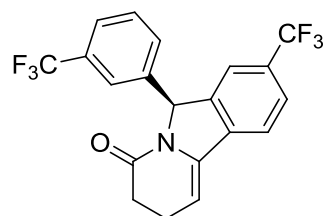

**5h**

$^{13}\text{C}\{^1\text{H}\}$  NMR, 201 MHz,  $\text{C}_6\text{D}_6$

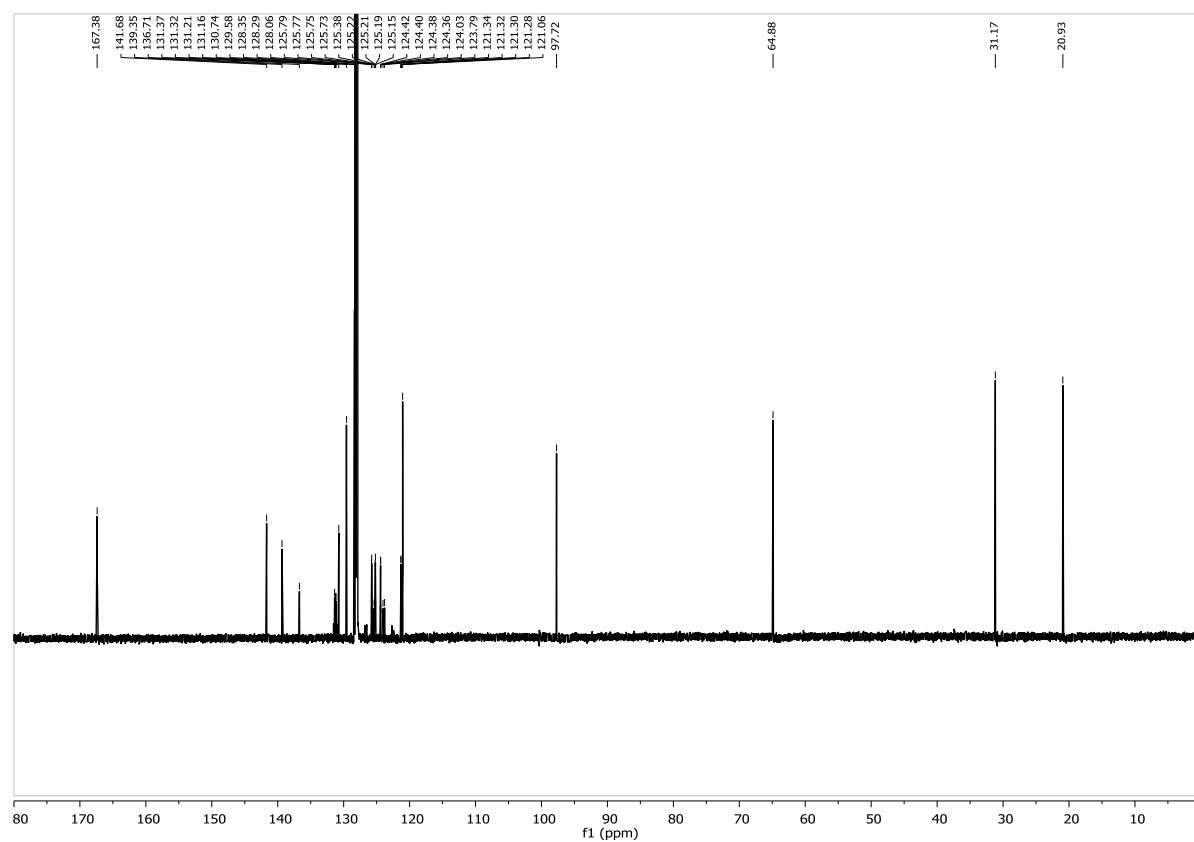

*Supporting Information*

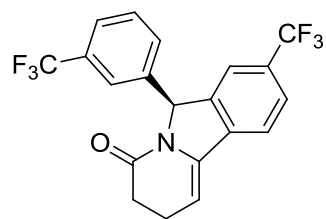

**5h**

<sup>19</sup>F{<sup>1</sup>H} NMR, 376 MHz, C<sub>6</sub>D<sub>6</sub>

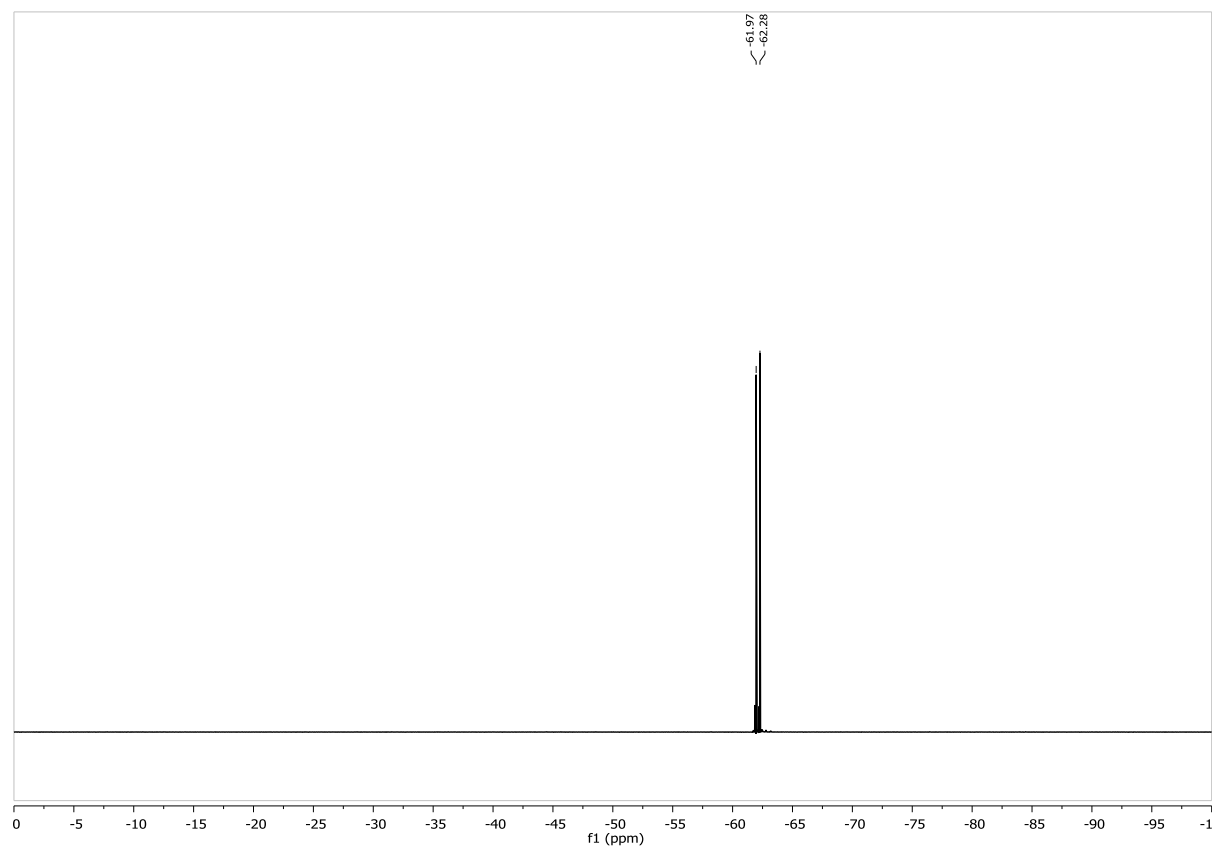

Supporting Information

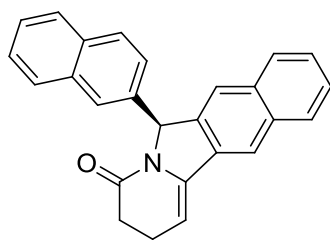

**5i**

$^1\text{H}$  NMR, 400 MHz,  $\text{C}_6\text{D}_6$

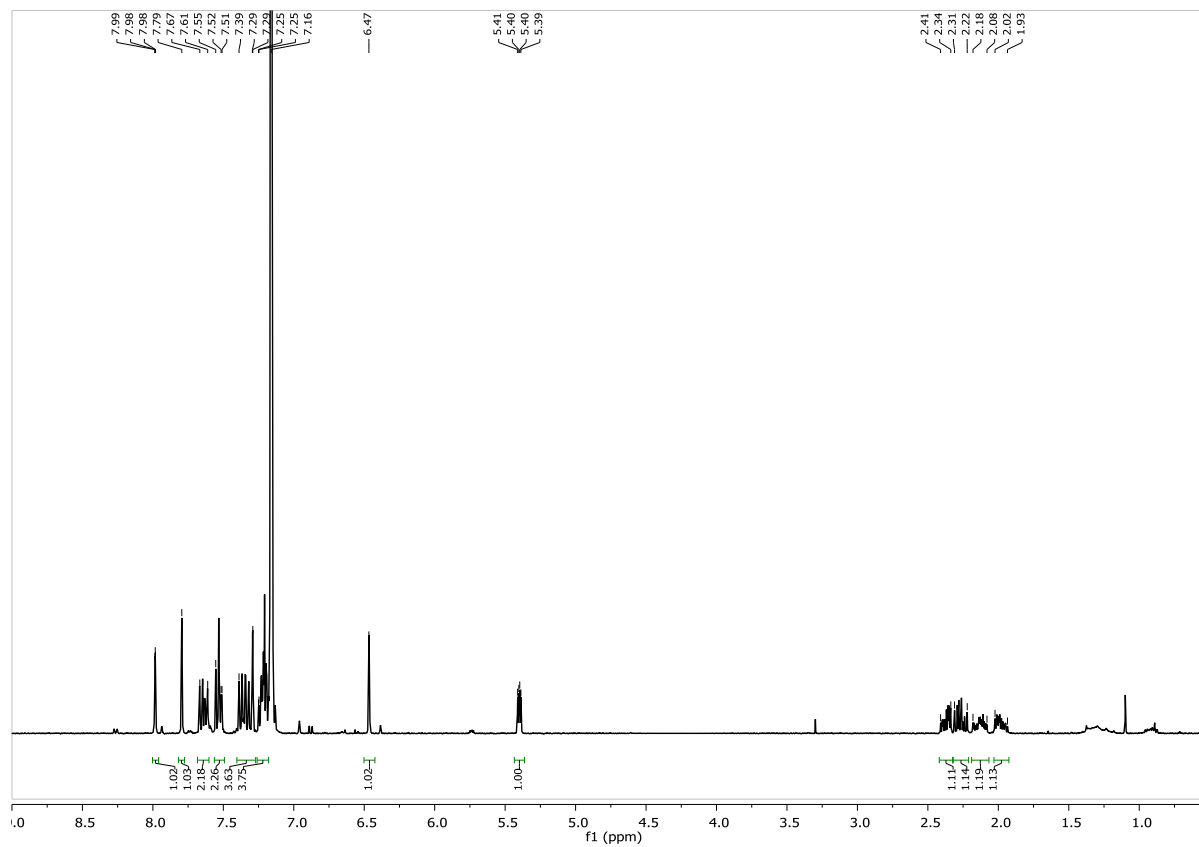

Supporting Information

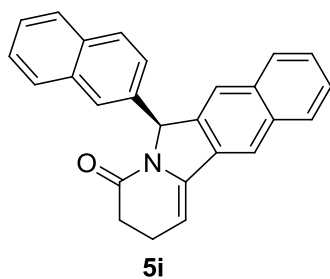

$^{13}\text{C}\{^1\text{H}\}$  NMR, 151 MHz,  $\text{C}_6\text{D}_6$

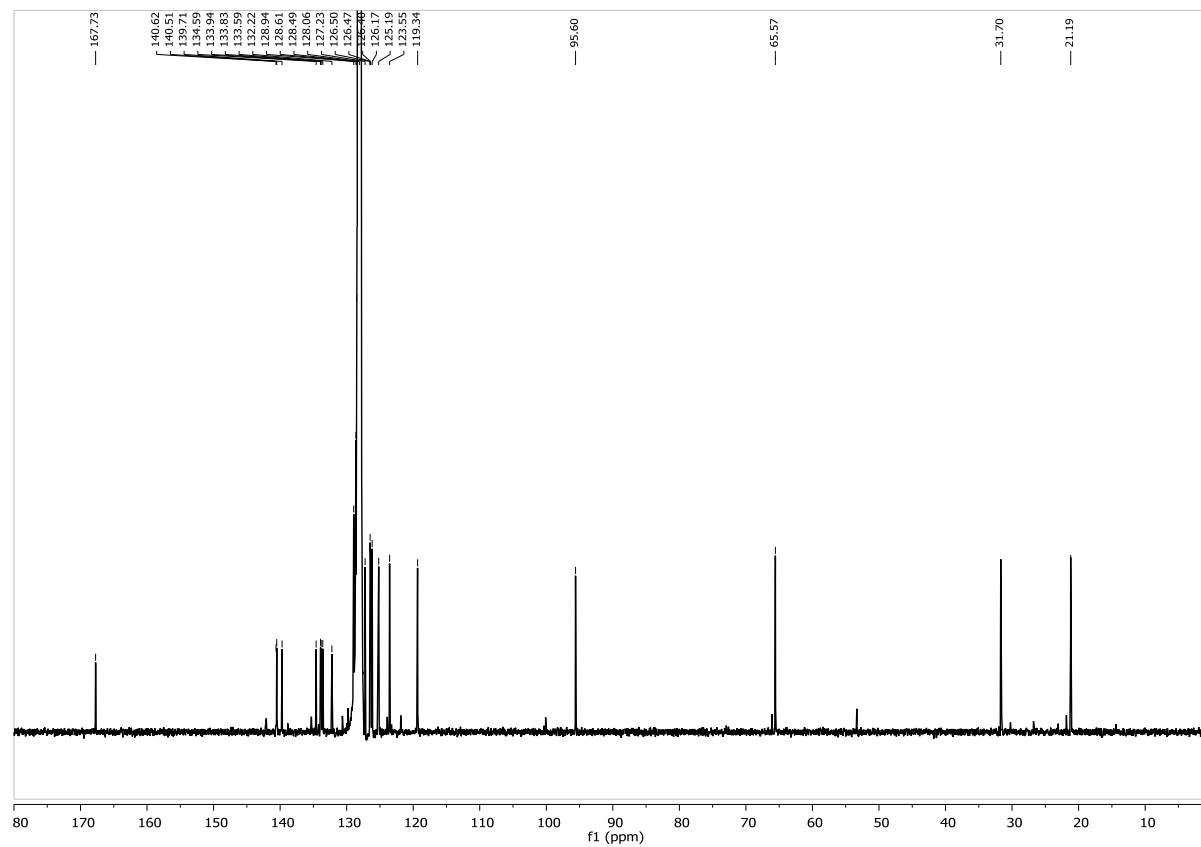



Supporting Information

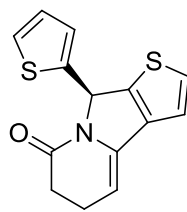

**5j**

$^1\text{H}$  NMR, 400 MHz,  $\text{C}_6\text{D}_6$

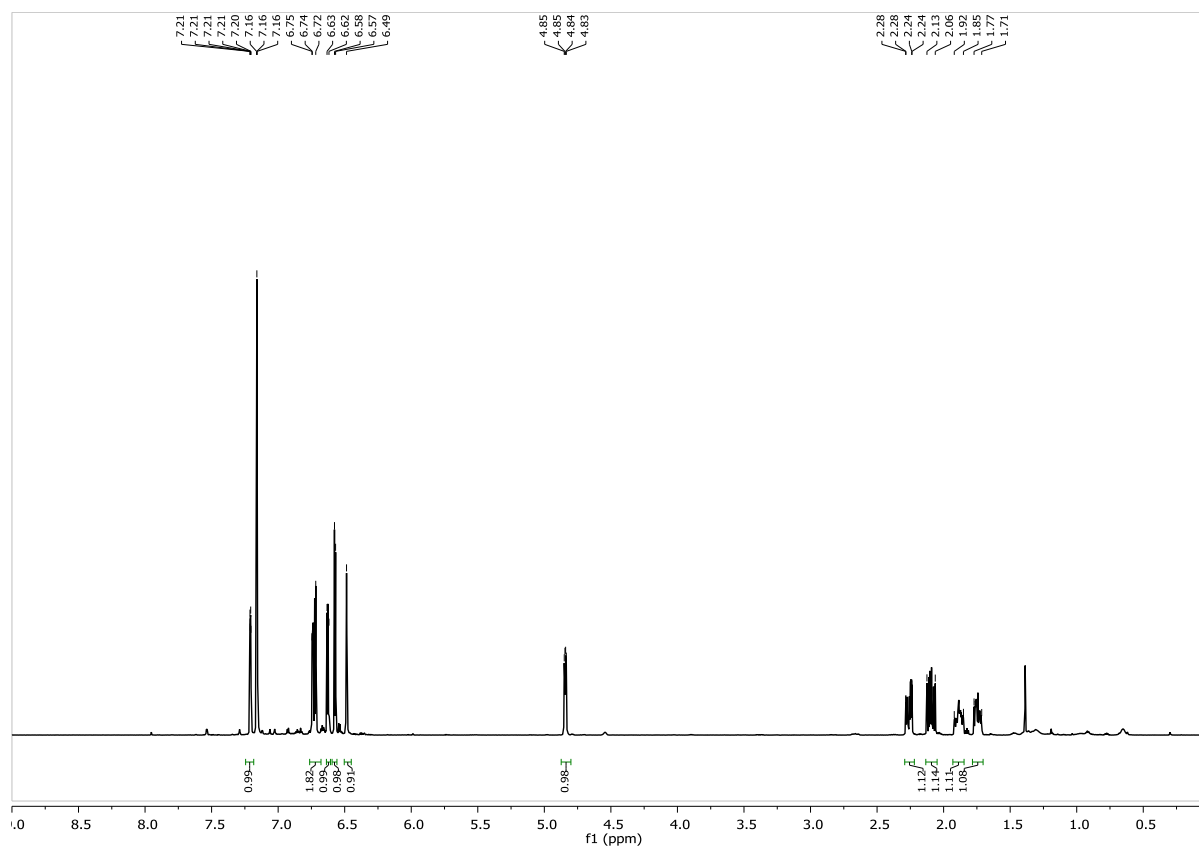

Supporting Information

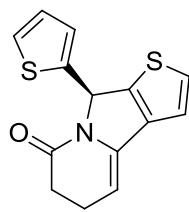

**5j**

$^{13}\text{C}\{^1\text{H}\}$  NMR, 151 MHz,  $\text{C}_6\text{D}_6$

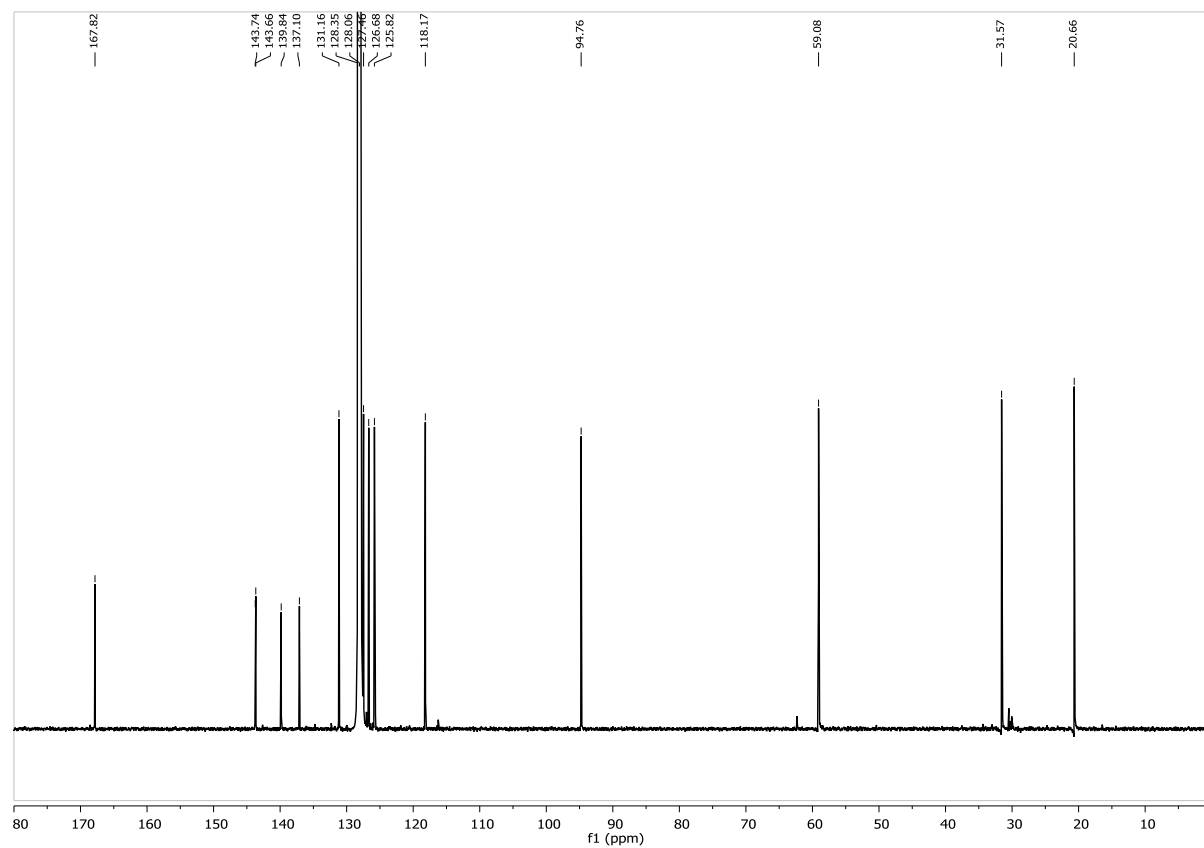

Supporting Information

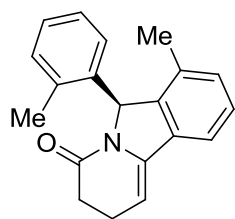

**5k**

$^1\text{H}$  NMR, 400 MHz,  $\text{C}_6\text{D}_6$

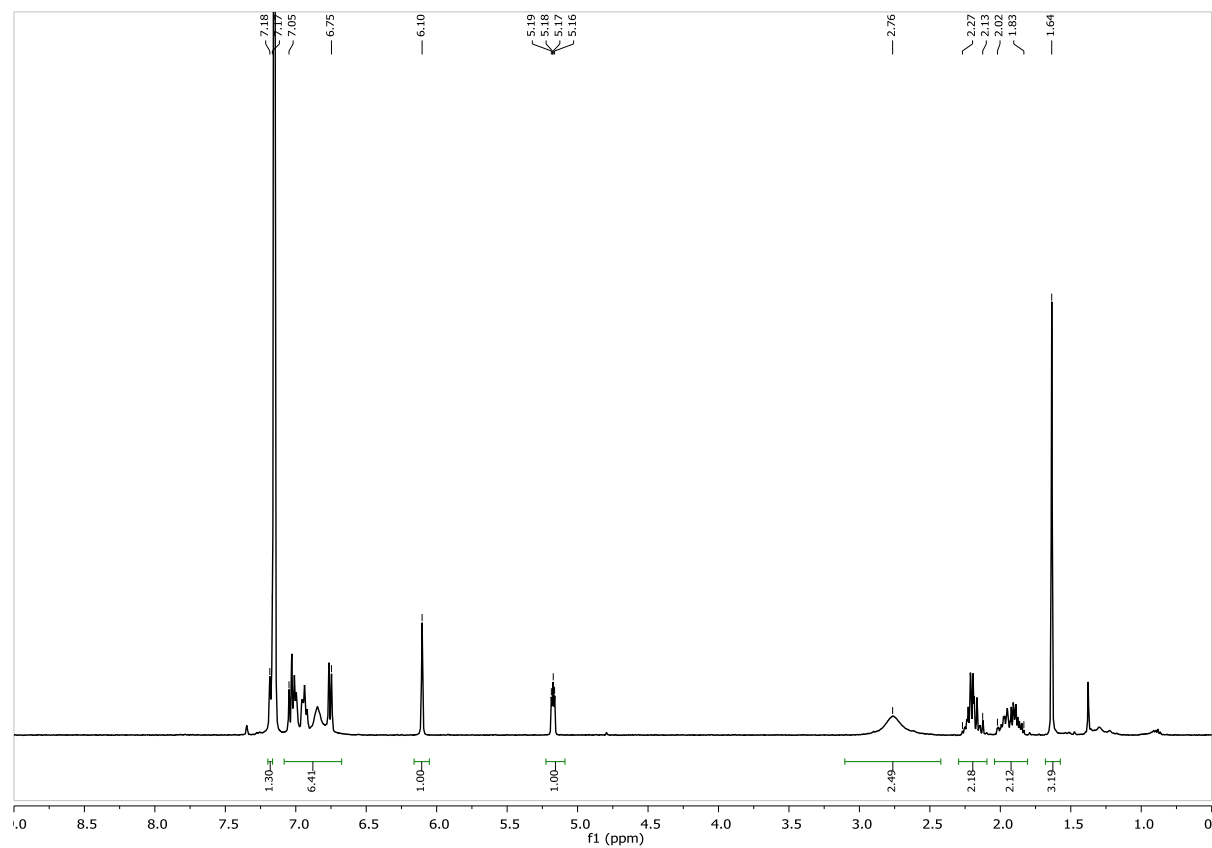

Supporting Information



**5k**

$^{13}\text{C}\{^1\text{H}\}$  NMR, 151 MHz,  $\text{C}_6\text{D}_6$

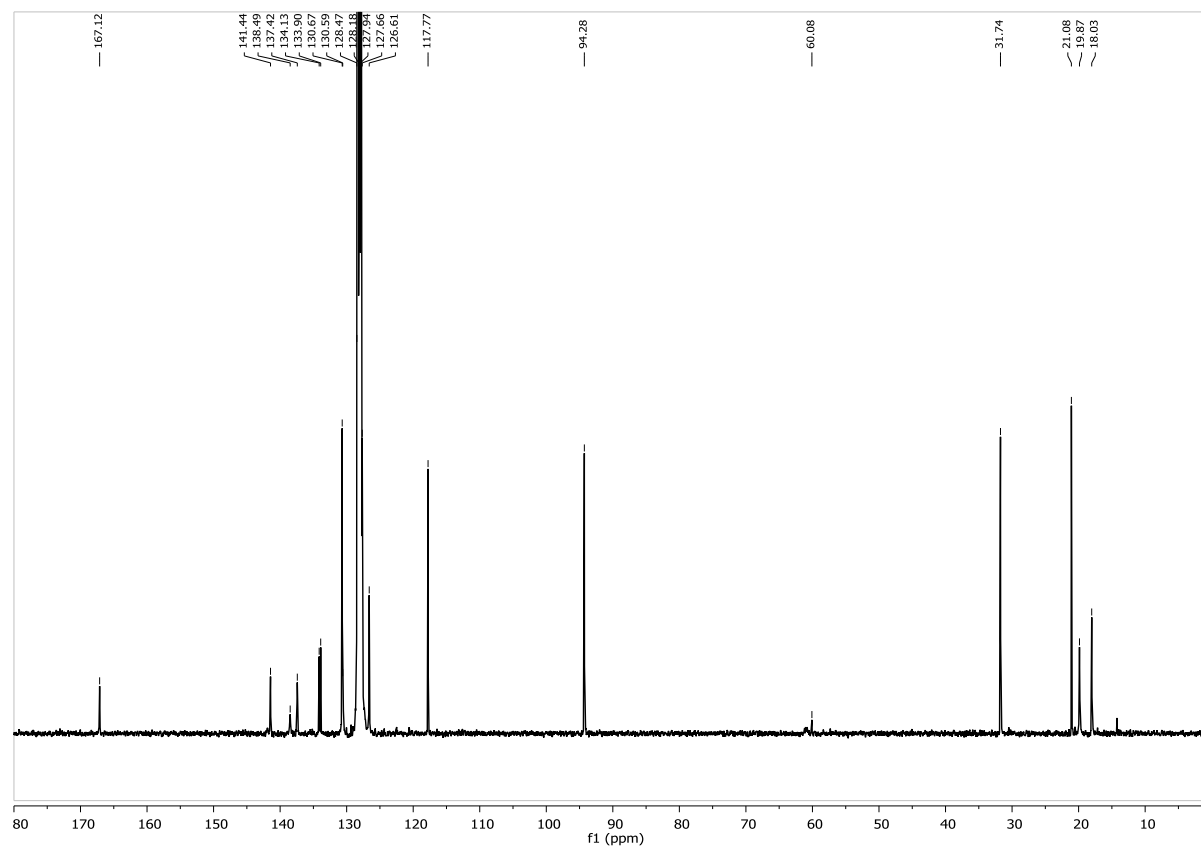

Supporting Information

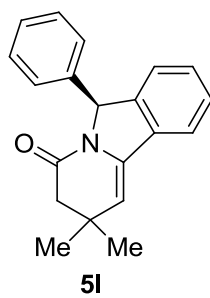

$^1\text{H}$  NMR, 400 MHz,  $\text{C}_6\text{D}_6$

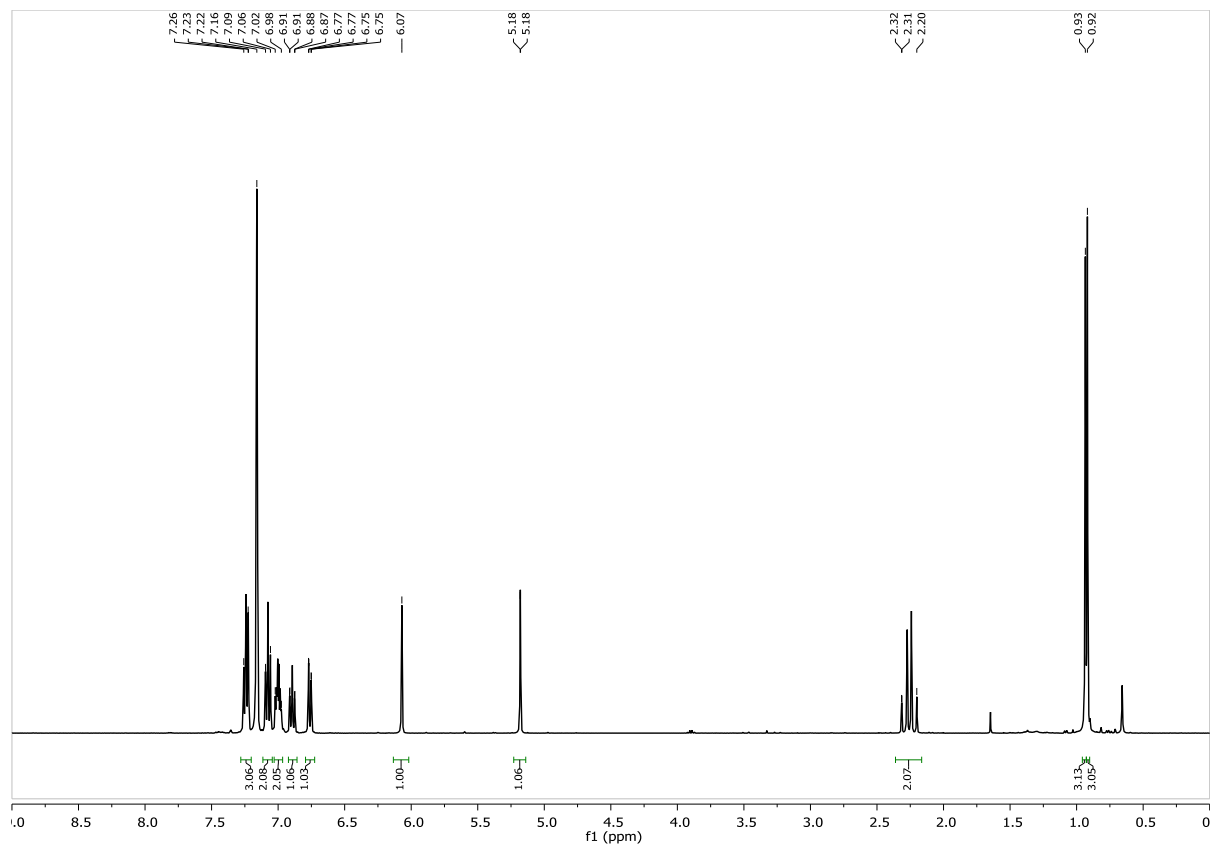

Supporting Information

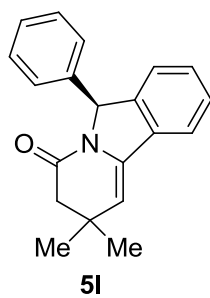

**5I**  
 $^{13}\text{C}\{^1\text{H}\}$  NMR, 151 MHz,  $\text{C}_6\text{D}_6$

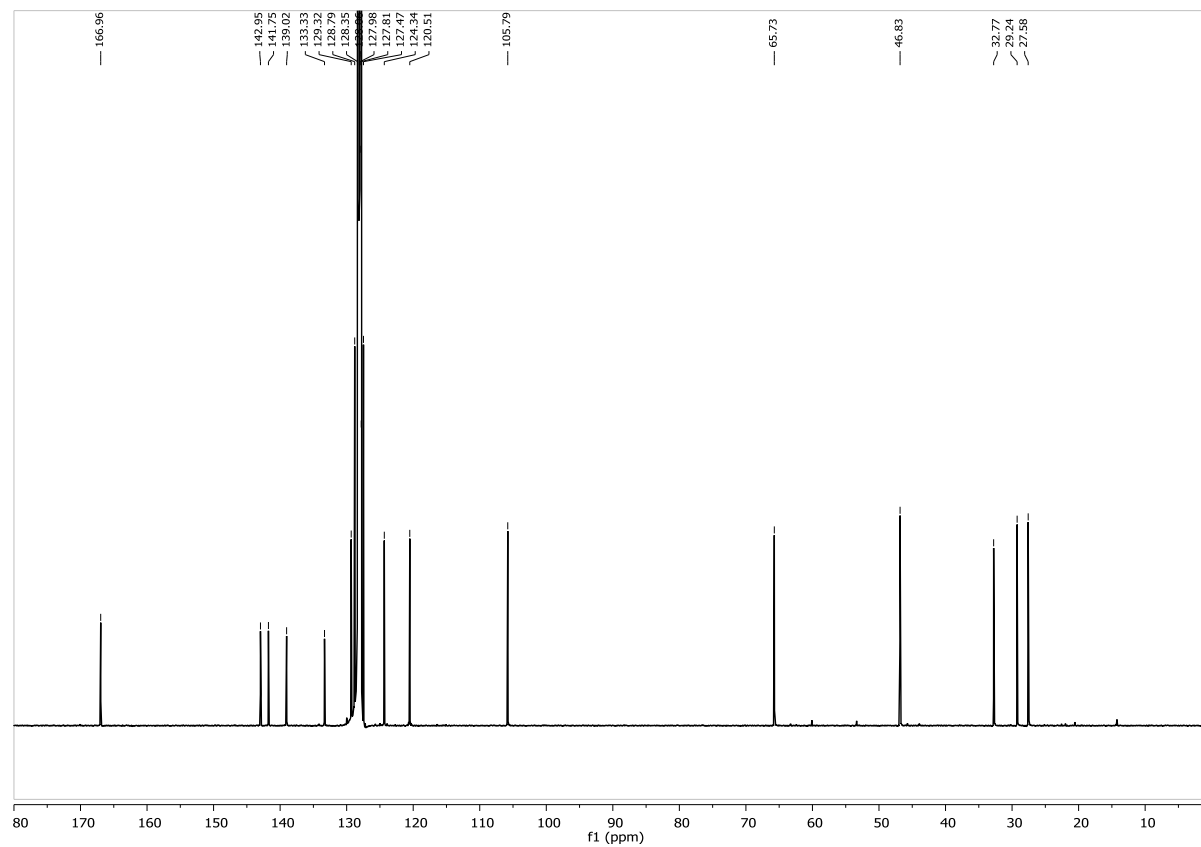

Supporting Information

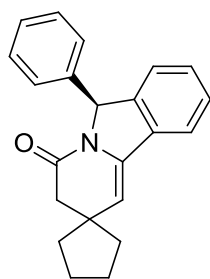

**5m**

$^1\text{H}$  NMR, 400 MHz,  $\text{C}_6\text{D}_6$

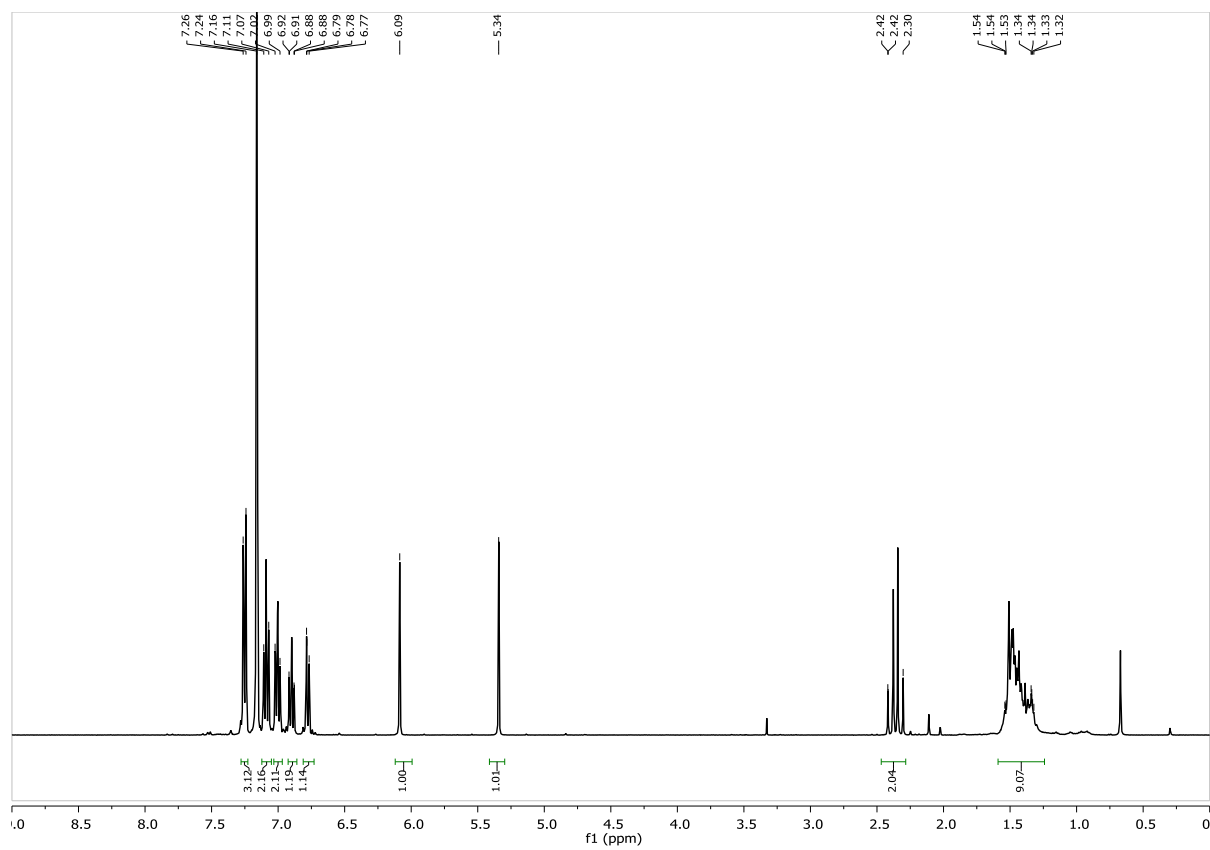

Supporting Information

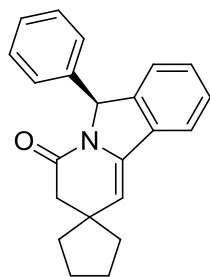

**5m**

$^{13}\text{C}\{^1\text{H}\}$  NMR, 151 MHz,  $\text{C}_6\text{D}_6$

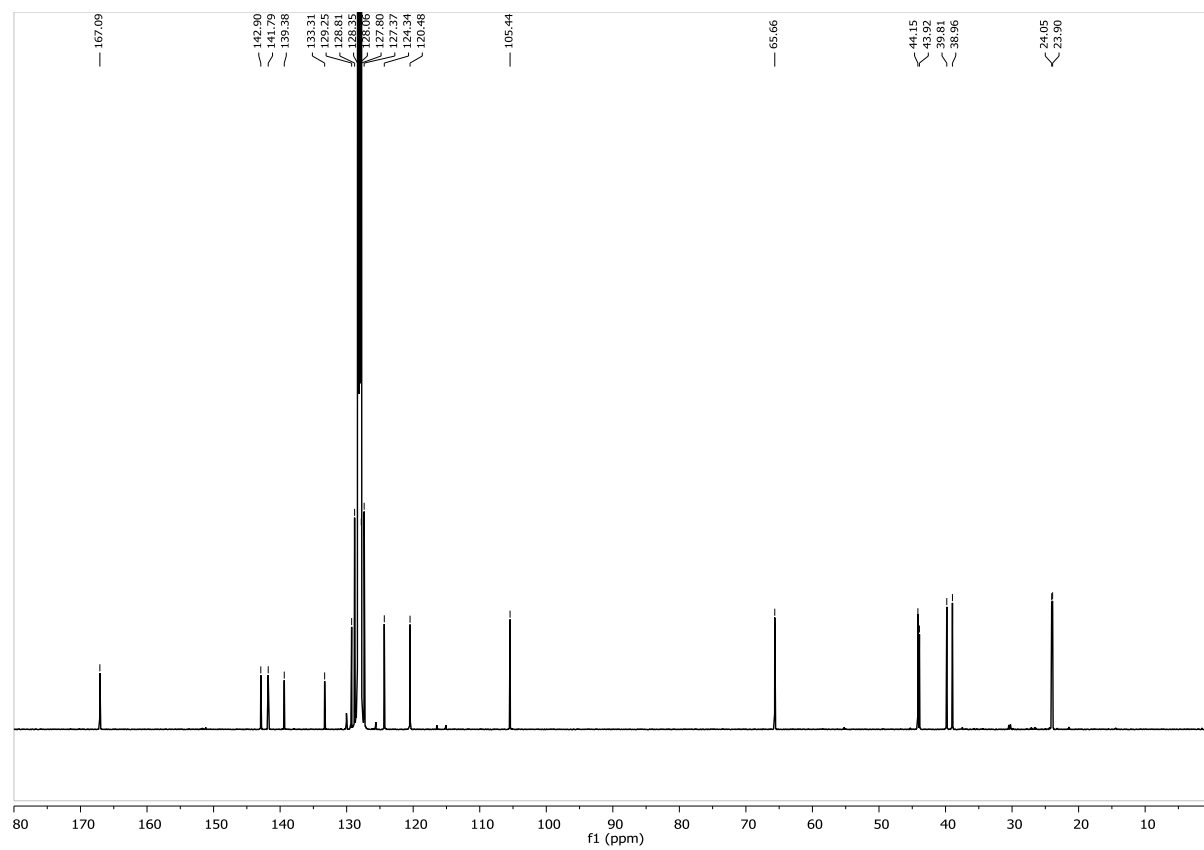



# Supporting Information

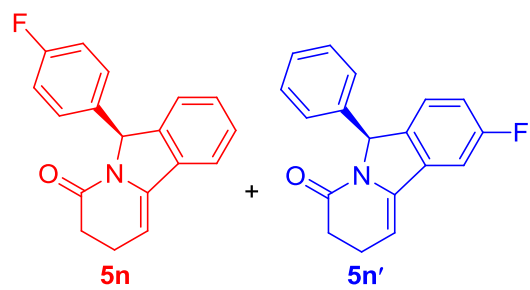

$^1\text{H}$  NMR, 400 MHz,  $\text{C}_6\text{D}_6$

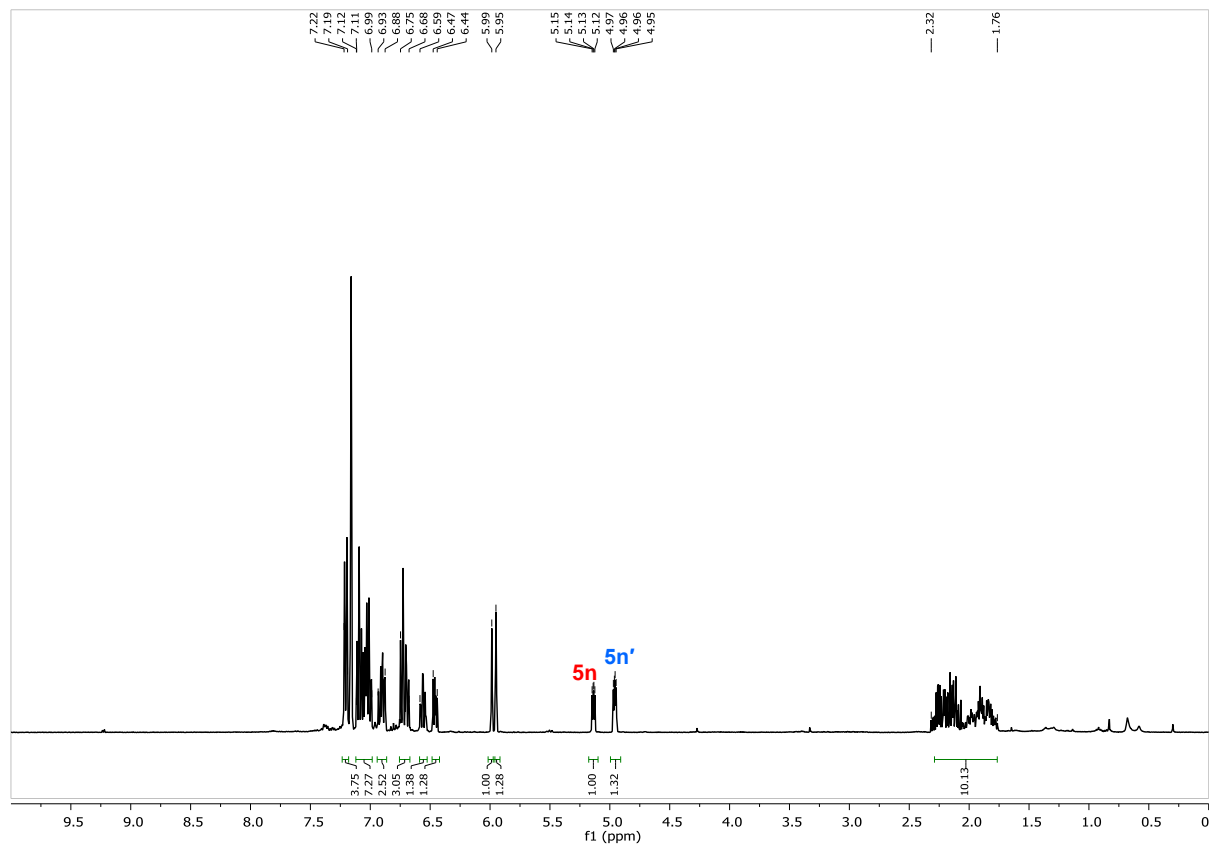

Supporting Information

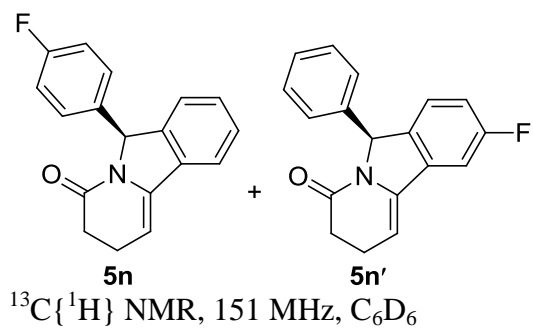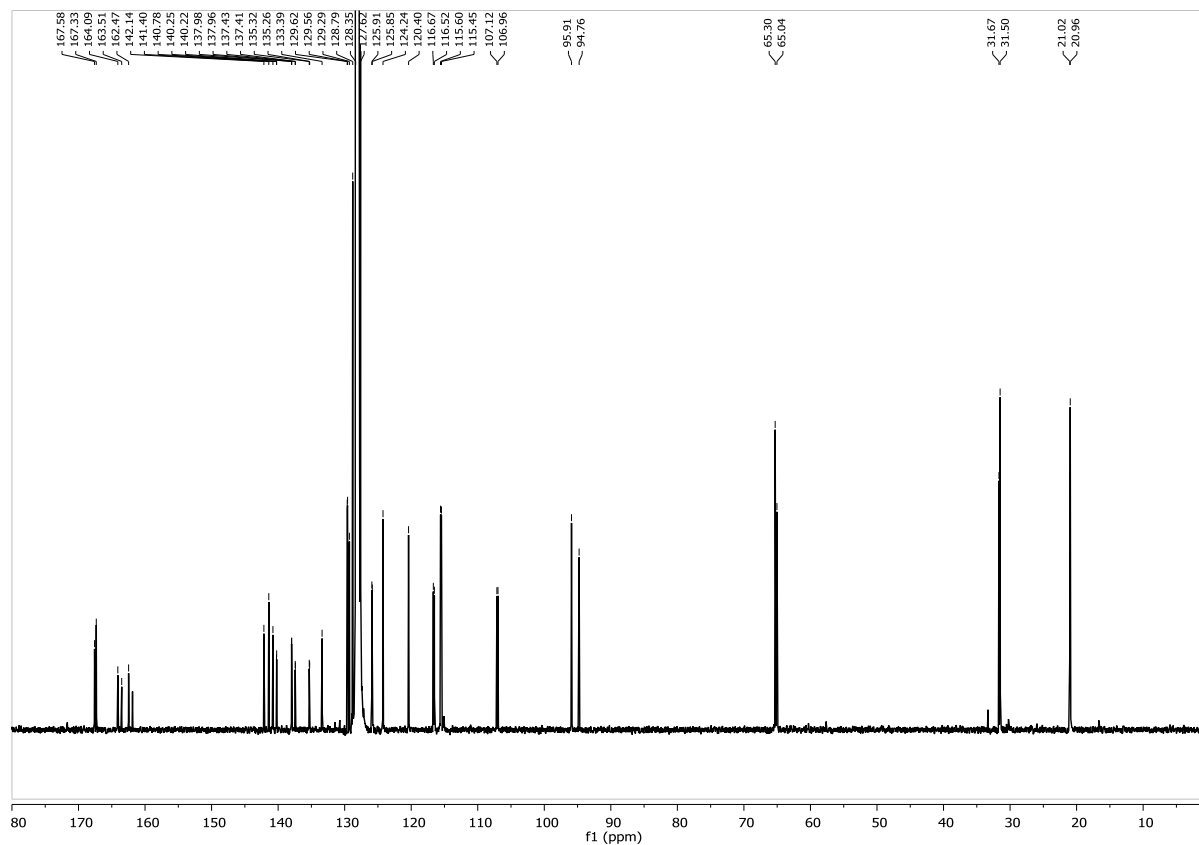

Supporting Information

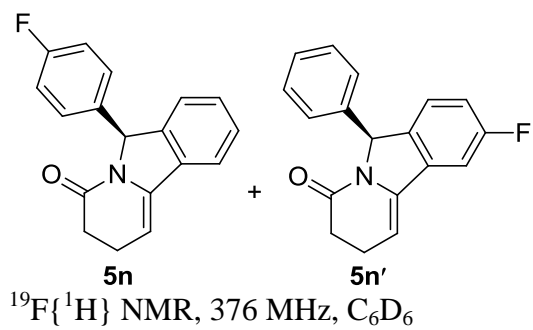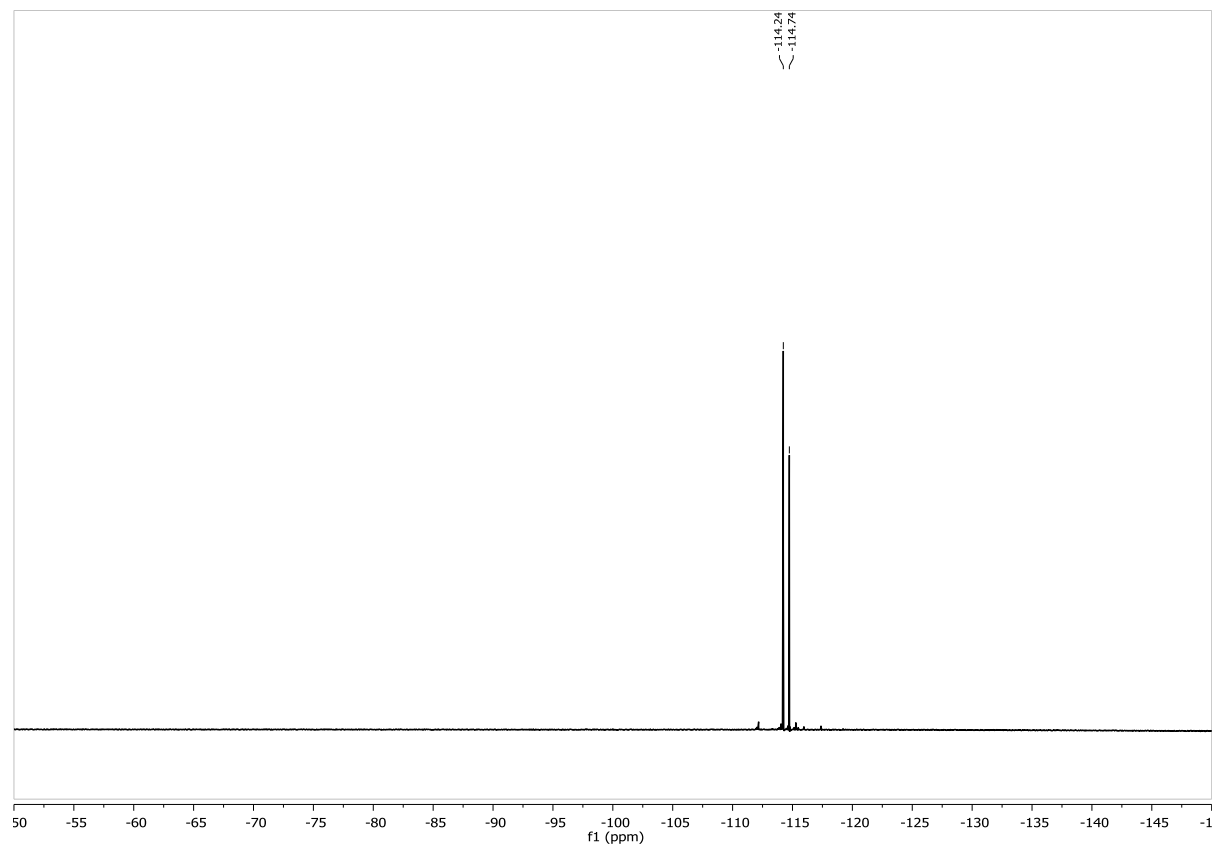

# Supporting Information

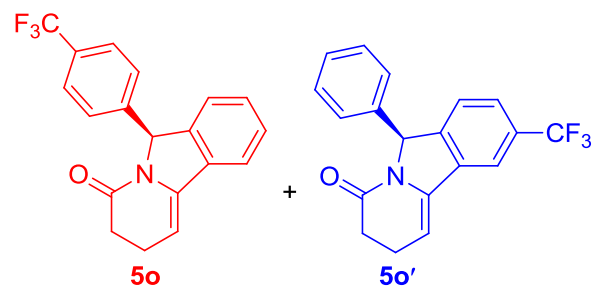

<sup>1</sup>H NMR, 400 MHz, C<sub>6</sub>D<sub>6</sub>

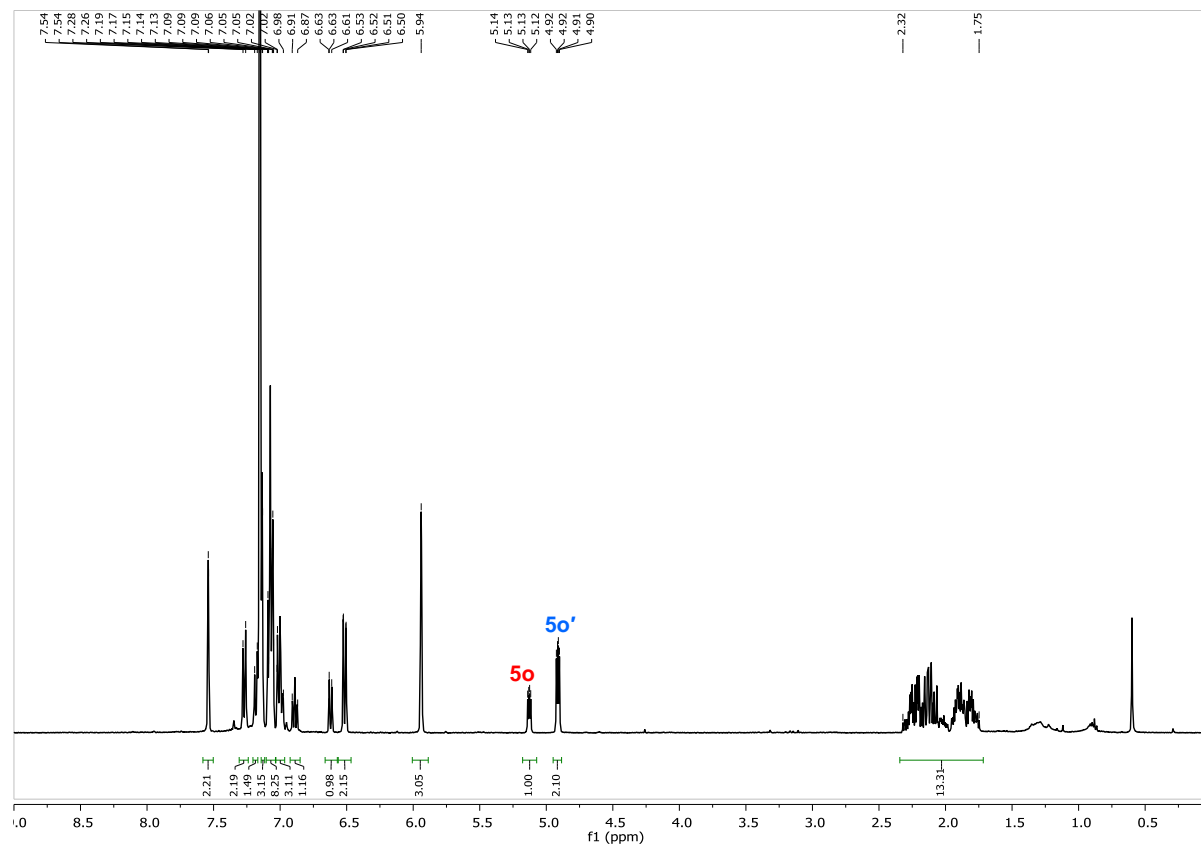

# Supporting Information

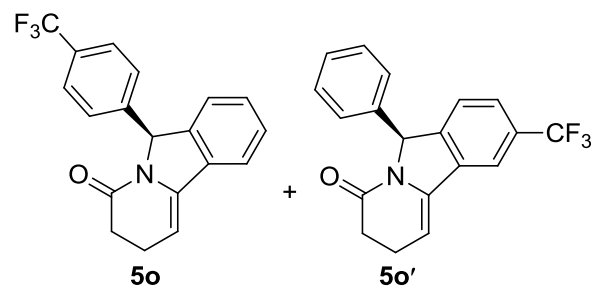

$^{13}\text{C}\{^1\text{H}\}$  NMR, 151 MHz,  $\text{C}_6\text{D}_6$

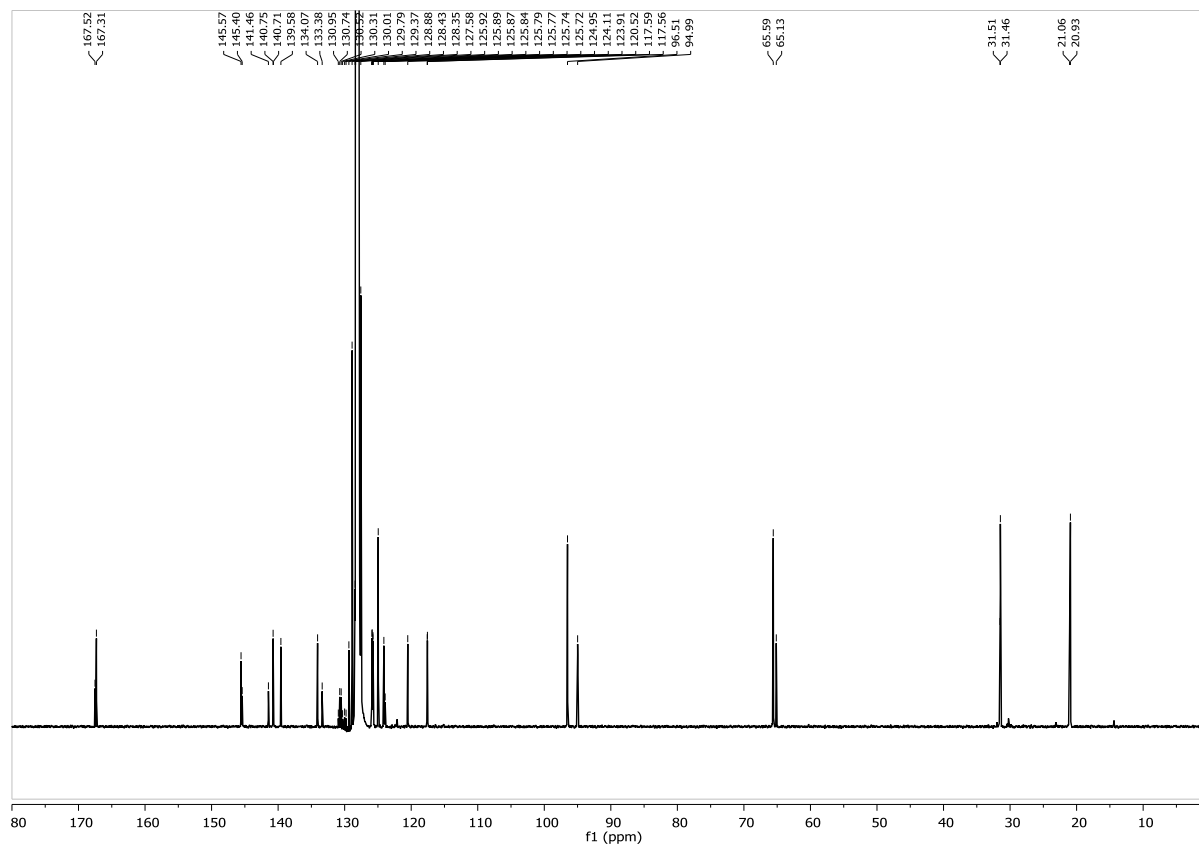

Supporting Information

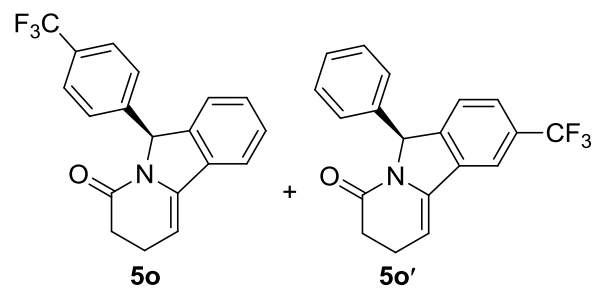

$^{19}\text{F}\{^1\text{H}\}$  NMR, 376 MHz,  $\text{C}_6\text{D}_6$

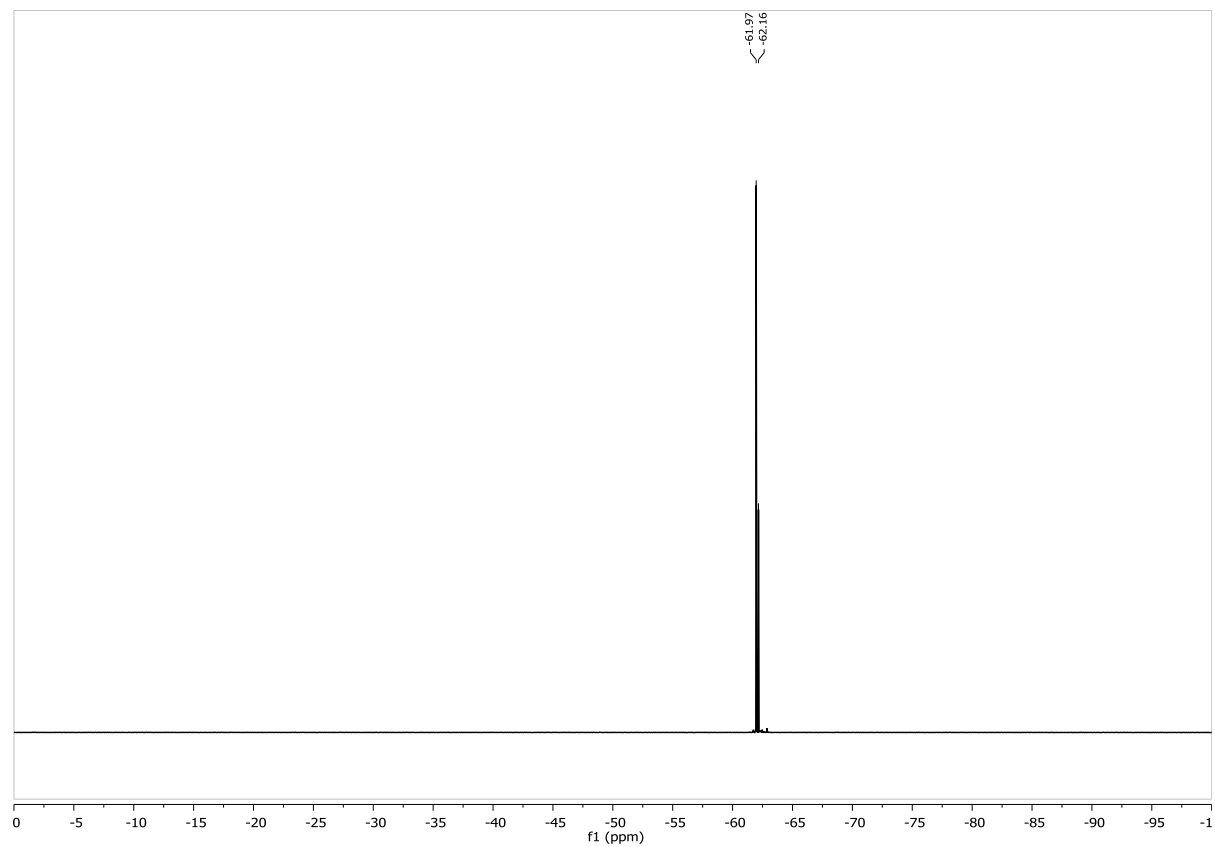

# Supporting Information

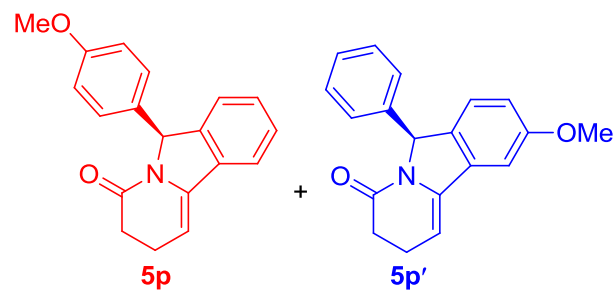

$^1\text{H}$  NMR, 400 MHz,  $\text{C}_6\text{D}_6$

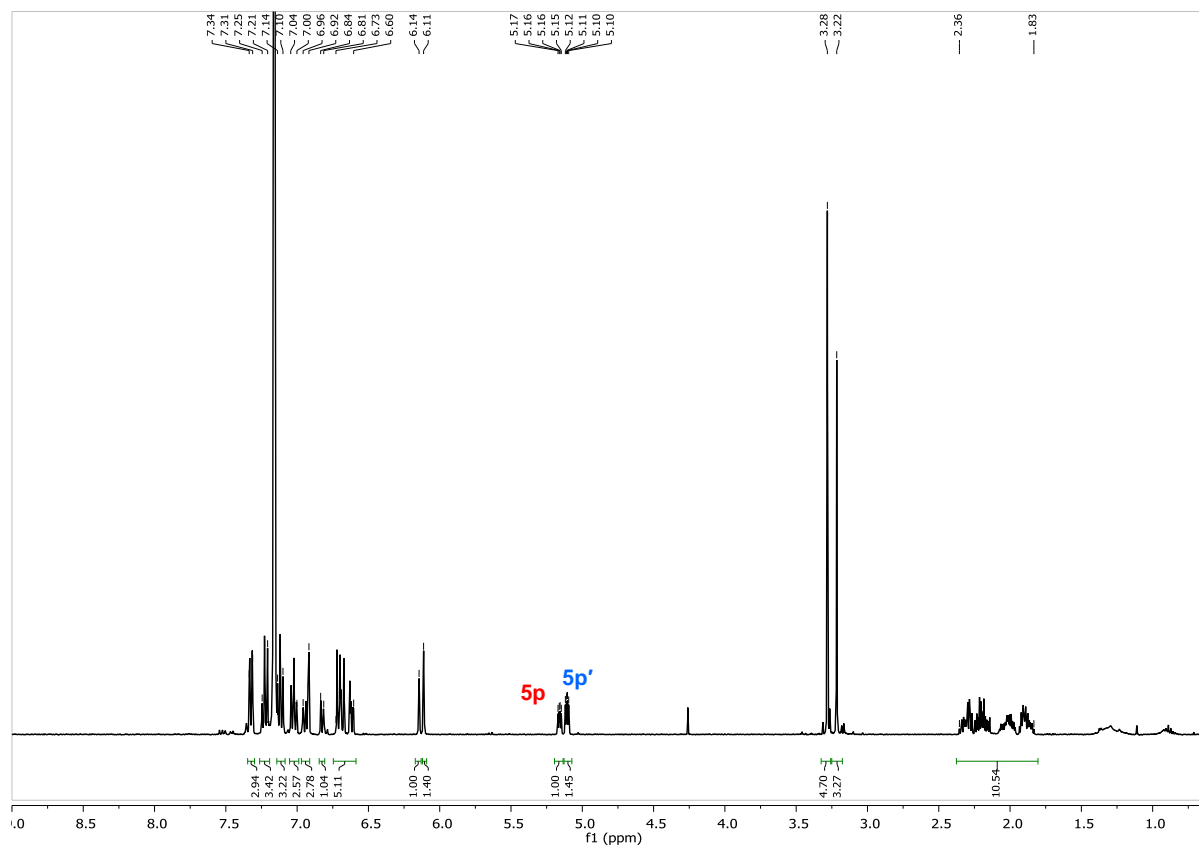

Supporting Information

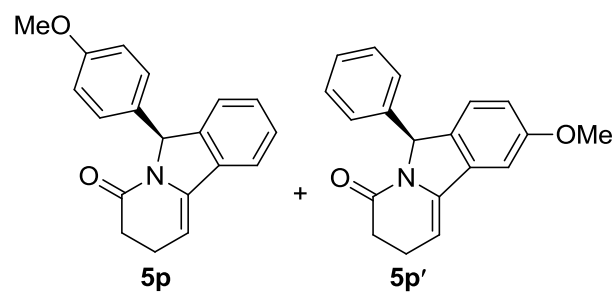

$^{13}\text{C}\{^1\text{H}\}$  NMR, 151 MHz,  $\text{C}_6\text{D}_6$

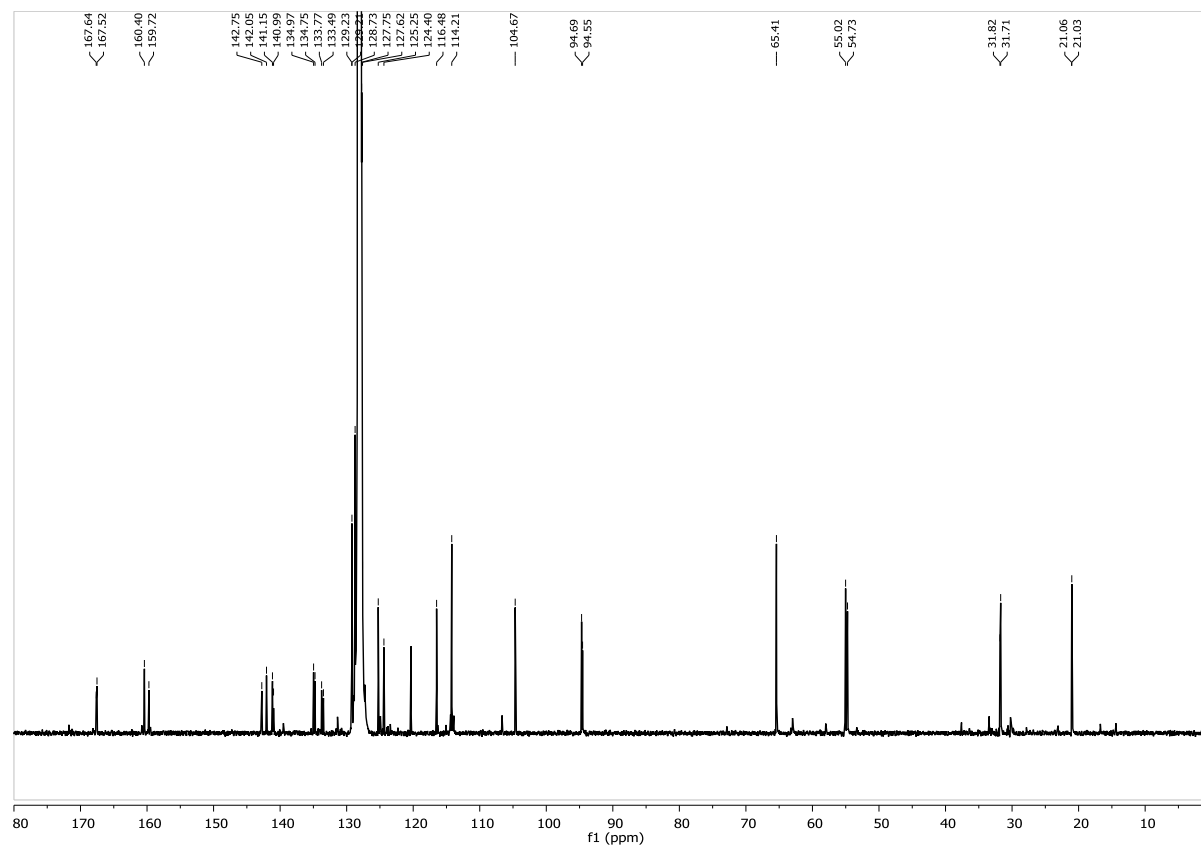



# Supporting Information

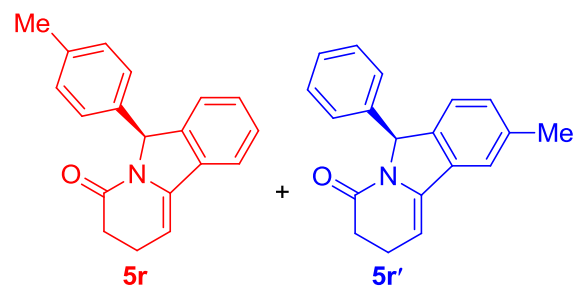

$^1\text{H}$  NMR, 400 MHz,  $\text{C}_6\text{D}_6$

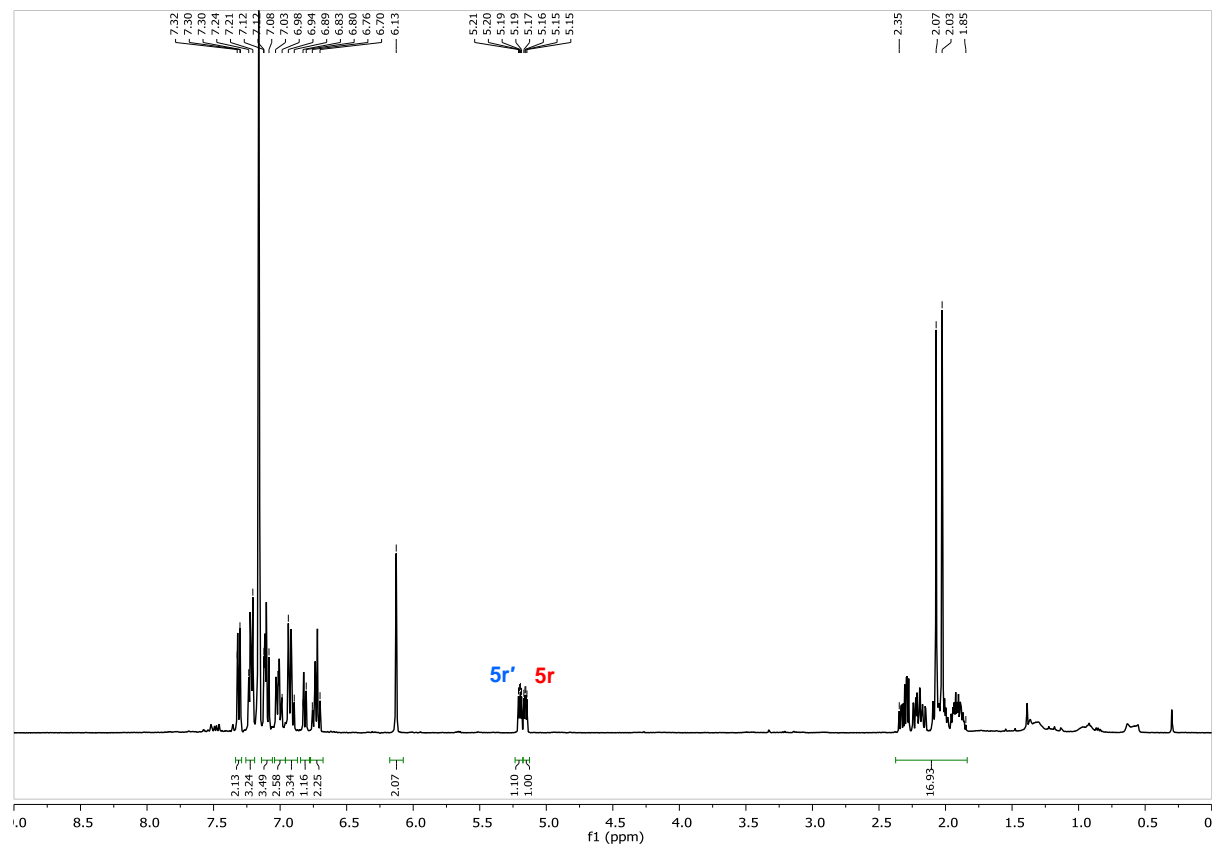

Supporting Information

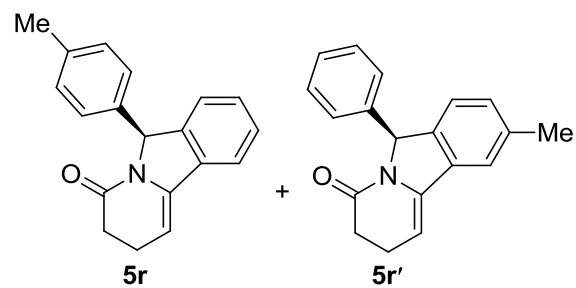

$^{13}\text{C}\{^1\text{H}\}$  NMR, 151 MHz,  $\text{C}_6\text{D}_6$

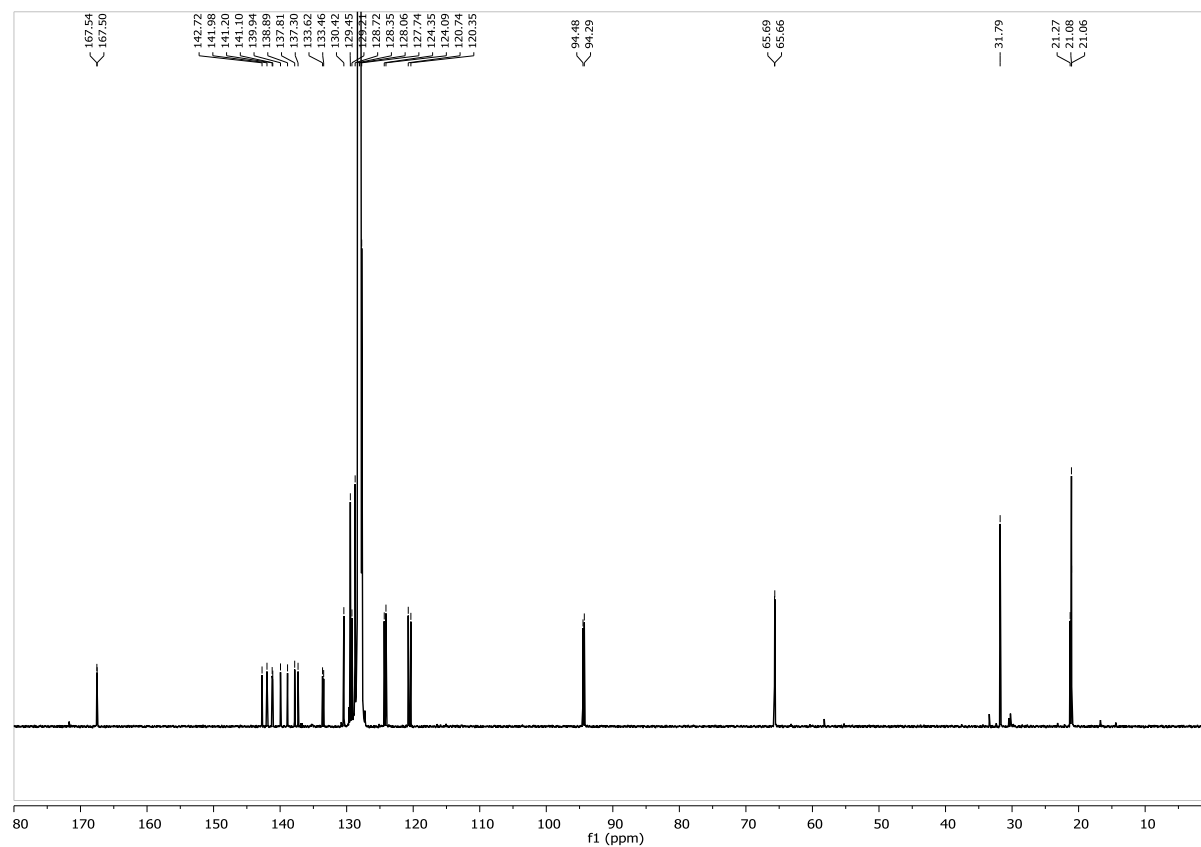

Supporting Information

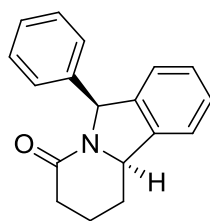

**6a**

$^1\text{H}$  NMR, 400 MHz,  $\text{C}_6\text{D}_6$

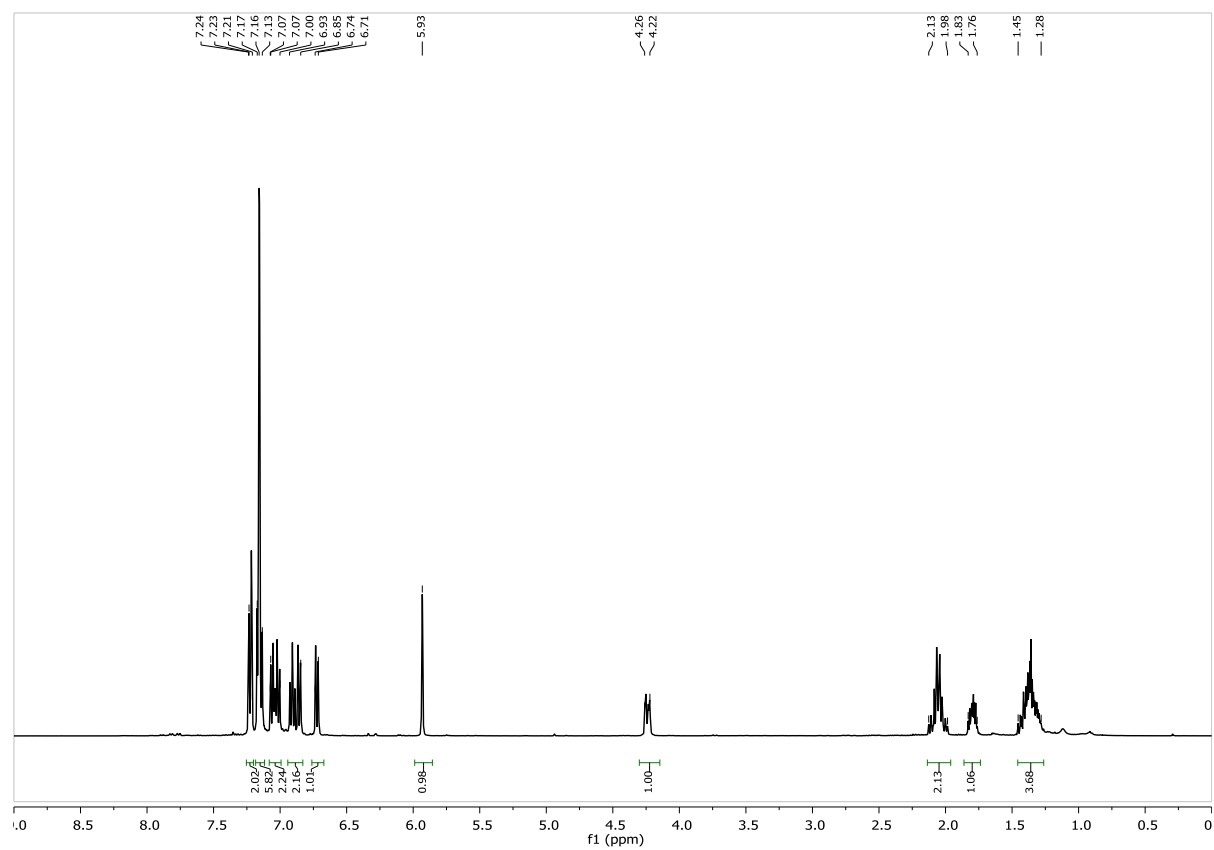

Supporting Information

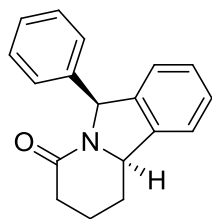

**6a**

$^{13}\text{C}\{^1\text{H}\}$  NMR, 101 MHz,  $\text{C}_6\text{D}_6$

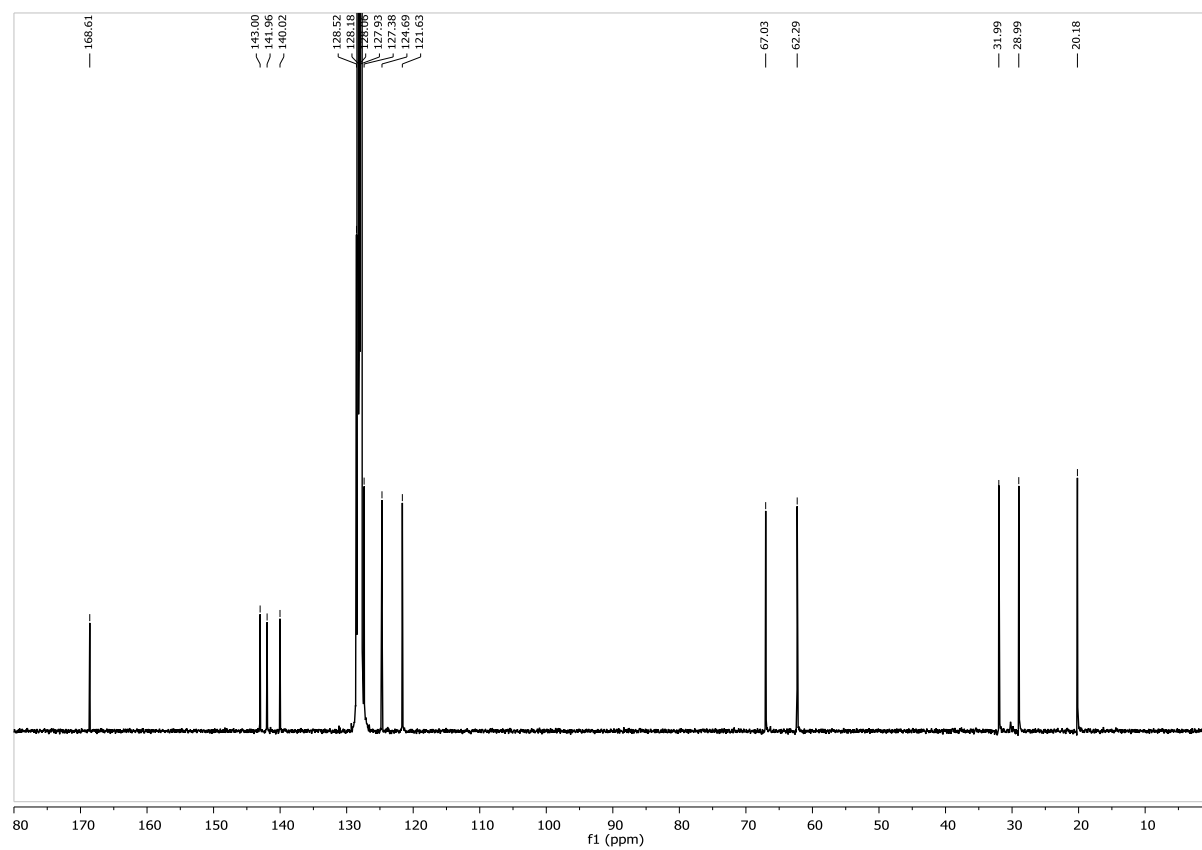

Supporting Information

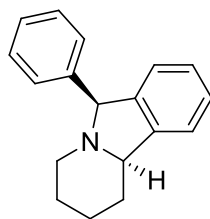

**7a**

$^1\text{H}$  NMR, 400 MHz,  $\text{C}_6\text{D}_6$

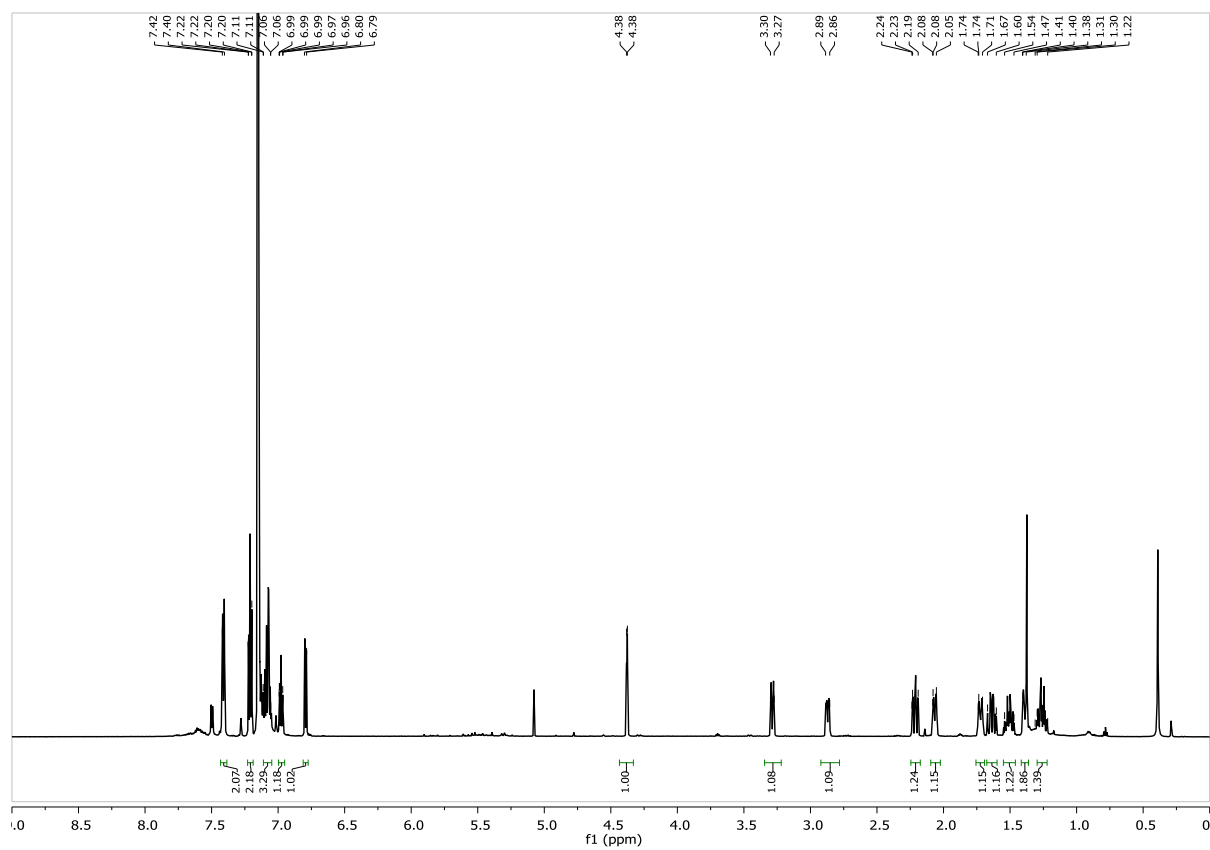

Supporting Information



**7a**

$^{13}\text{C}\{^1\text{H}\}$  NMR, 101 MHz,  $\text{C}_6\text{D}_6$

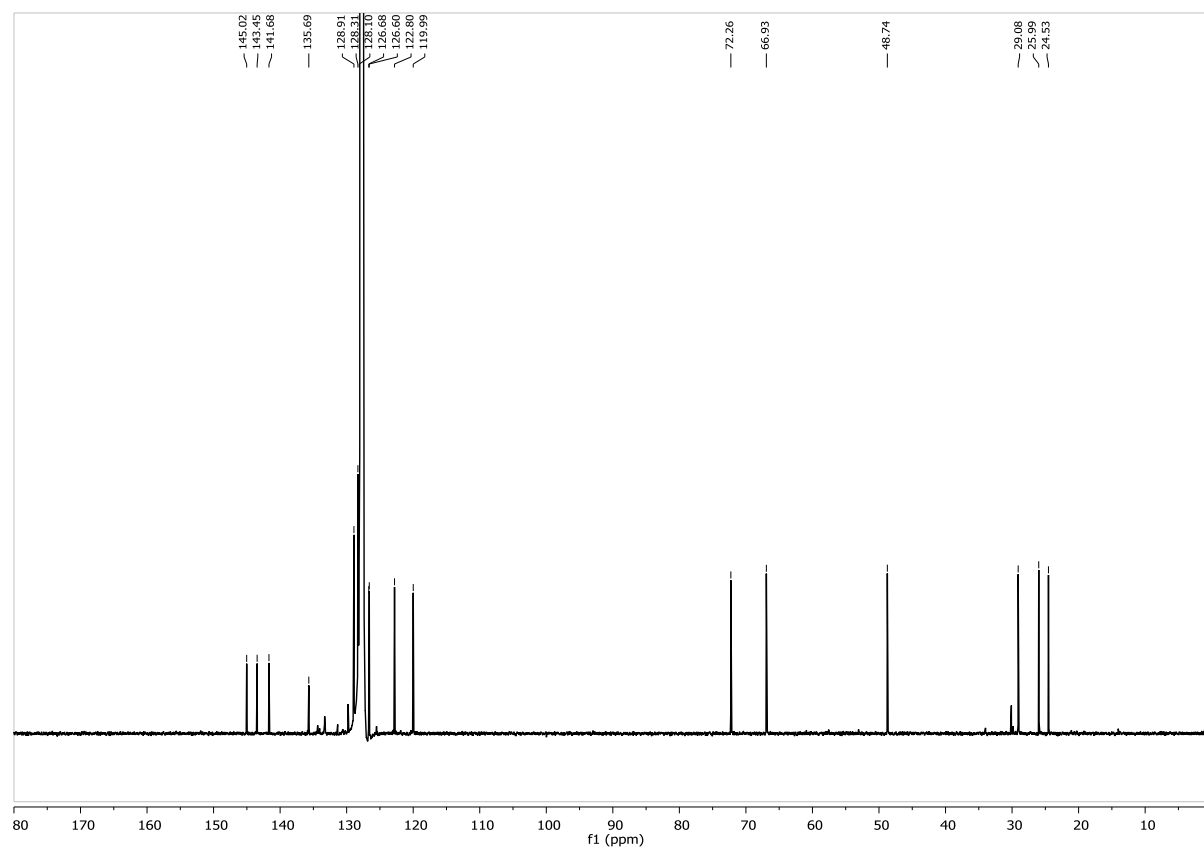

Supplement: Supplementary file 1 [file 9432949]
